# Supplementary material for: Recyclable rhodium-catalyzed C–H activation/[4 + 2] annulation with unconventional regioselectivity at ambient temperature: experimental development and mechanistic insight
Source: Royal Society of Chemistry journal article supplement (doi:10.1039/d2gc02347d), 2022-01-01

## *Supporting Information*

### **Recyclable rhodium-catalyzed C-H activation/[4+2] annulation with unconventional regioselectivity at ambient temperature: experimental development and mechanistic insight**

Haifang Meng,<sup>a</sup> Huiying Xu,<sup>c</sup> Zhi Zhou,<sup>c</sup> Zhenhao Tang,<sup>a</sup> Yidi Li,<sup>b,d</sup> Yu Zhou,<sup>\*,b,d</sup> Wei Yi<sup>\*,c</sup> and Xiaowei Wu<sup>\*,a,b,d</sup>

<sup>a</sup>Zhongshan Institute for Drug Discovery, Shanghai Institute of Materia Medica, Chinese Academy of Sciences, Zhongshan 528400, China

<sup>b</sup>Shanghai Institute of Materia Medica, Chinese Academy of Sciences, Shanghai 201203, China

<sup>c</sup>Guangzhou Municipal and Guangdong Provincial Key Laboratory of Protein Modification and Degradation & Molecular Target and Clinical Pharmacology, State Key Laboratory of Respiratory Disease, School of Pharmaceutical Sciences & the Fifth Affiliated Hospital, Guangzhou Medical University, Guangzhou, Guangdong 511436, China.

<sup>d</sup>University of Chinese Academy of Sciences, No.19A Yuquan Road, Beijing 100049, China

|                                                                                                                              |     |
|------------------------------------------------------------------------------------------------------------------------------|-----|
| General information.....                                                                                                     | 2   |
| Preparation of Starting Materials.....                                                                                       | 2   |
| General Procedure for the Synthesis of Isoquinolinones <b>3</b> .....                                                        | 5   |
| Characterization Data of Products <b>3</b> and <b>4</b> .....                                                                | 6   |
| NOESY Experiments for Product <b>3bi</b> , <b>3bj</b> , <b>3bk</b> , <b>4a</b> , <b>4b</b> , <b>4c</b> , and <b>4d</b> ..... | 24  |
| Intermolecular Competition Experiment and Gram-Scale Experiments.....                                                        | 28  |
| Control Experiments.....                                                                                                     | 31  |
| Mechanistic Experiments.....                                                                                                 | 32  |
| Catalyst Recycling Experiments.....                                                                                          | 37  |
| X-ray Data of Compound <b>3aa</b> .....                                                                                      | 38  |
| DFT Calculations.....                                                                                                        | 44  |
| References.....                                                                                                              | 137 |
| Copies of <sup>1</sup> H, <sup>13</sup> C NMR and <sup>19</sup> F NMR spectra.....                                           | 139 |

## General Information

The chemical reagents were purchased from commercial sources and used directly without purification. Analytical thin-layer chromatography (TLC): HSGF 254 (0.15-0.2 mm thickness). Detection was conducted under UV light at 254 nm. Preparative thin layer chromatography was HSGF 254 (0.4-0.5 mm thickness). Yields refer to isolated compounds.  $^1\text{H}$ ,  $^{13}\text{C}$ , and  $^{19}\text{F}$  NMR spectra were collected on a Bruker 500 MHz instrument in chloroform-*d* or DMSO-*d*<sub>6</sub>. Chemical shifts ( $\delta$ ) are expressed as parts per million (ppm). Proton coupling patterns were recorded as singlet (s), broad (br), doublet (d), triplet (t), quartet (q), and multiplet (m). HRMS (high-resolution mass) were measured on a spectrometer with an electrospray ionization (ESI) source.

## Preparation of Starting Materials

General procedure A for the preparation of **1aa-1at**.<sup>1-5</sup>

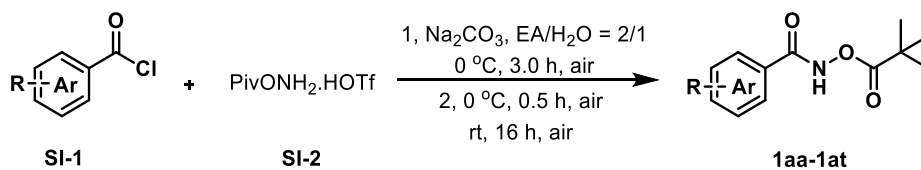

In a 100 mL round-bottom flask, O-pivaloylhydroxamine triflic acid (**SI-2**, 801 mg, 3.0 mmol, 1.0 eq.) and  $\text{Na}_2\text{CO}_3$  (635 mg, 6.0 mmol, 2.0 eq.) were combined in a 2:1 mixed solvent of EtOAc (20 mL) and  $\text{H}_2\text{O}$  (10 mL). The mixture was cooled under an ice bath and stirred at 0 °C for 1.0 h. Then acid chloride (**SI-1**, 3.0 mmol, 1.0 eq.) was added dropwise under an ice bath and stirred at 0 °C for 1.0 h. Then, the mixture was stirred for 16.0 h and slowly warmed up to room temperature. The reaction mixture was then diluted with EtOAc (20 mL) and washed twice with sat.  $\text{NaHCO}_3$  and brine. The organic layer was dried over  $\text{Na}_2\text{SO}_4$ , filtered, and concentrated. The purification was made by flash column chromatography using an appropriate solvent mixture (petroleum ether/ethyl acetate) to afford the pure products **1aa-1at**. Compounds were prepared similarly according to the literature procedure, and their characterization data were in accordance with that previously reported.

General procedure B for the preparation of propargyl alcohols **2aa-2am**, **2ar-2at**.<sup>6-11</sup>

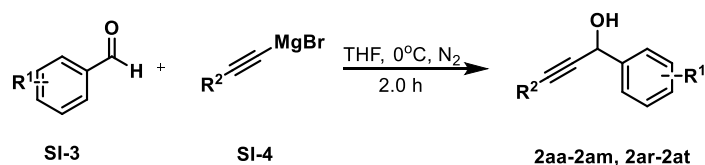

In a 100 mL round-bottom flask, the solution of the aldehyde (**SI-3**, 5.0 mmol, 1.0 eq.) in dry THF (10 mL) was added dropwise to the Grignard reagent (**SI-4**, 1.2 eq., 6.0 mmol, 0.5 M in THF) at 0°C under nitrogen atmosphere. The reaction mixture was stirred at 0°C for one hour and then another hour at room temperature. The completion of the reactions was confirmed by TLC, the mixture was quenched with a saturated solution of NH<sub>4</sub>Cl (added slowly under cooling) and extracted with ethyl acetate (3 × 100 mL), dried with anhydrous Na<sub>2</sub>SO<sub>4</sub>. The combined organic solvent was removed under vacuum. The crude product was purified by column chromatography on silica gel (petroleum ether/ethyl acetate) to obtain the pure products. Compounds were prepared similarly according to the literature procedure, and their characterization data were in accordance with that previously reported.

General procedure C for the preparation of **2ap** and **2aq**.

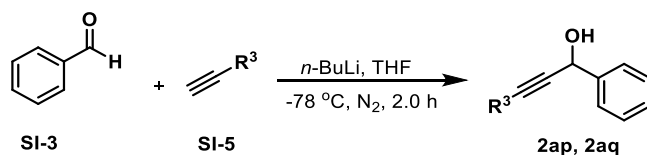

In a 100 mL round-bottom flask, a mixture solution of the benzaldehyde (**SI-3**, 5.0 mmol, 1.0 eq.) and alkyne (**SI-5**, 5.0 mmol, 1.0 eq.) in dry THF (15 mL) were added the *n*-BuLi (1.2 eq., 6.0 mmol, 1.6 M in THF) dropwise at -78°C under nitrogen atmosphere. The reaction mixture was stirred at 0°C for 2.0 h until the completion of the reaction. The mixture was quenched with a saturated solution of NH<sub>4</sub>Cl (added slowly under cooling) and extracted with ethyl acetate (3 × 100 mL), dried with anhydrous Na<sub>2</sub>SO<sub>4</sub>. The combined organic solvent was removed under vacuum. The crude product was purified by column chromatography on silica gel (petroleum ether/ethyl acetate) to give the pure products. Compounds were prepared similarly according to the literature procedure, and their characterization data were in accordance with that previously reported.

General procedure D for the preparation of **2au**.<sup>12</sup>

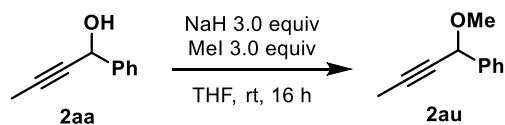

In a 50 mL round-bottom flask, 108 mg NaH were suspended in dry THF (10 mL) at room temperature under nitrogen atmosphere. **2aa** (1.5 mmol, 1.0 eq.) were added and the suspension was stirred for 30 min, followed by the addition of 0.28 mL (4.5 mmol, 3.0 eq.). The reaction mixture solution was stirred at room temperature for 16.0 h until the completion of the reaction. The mixture was quenched with water and extracted with DCM (3 × 20 mL), dried with anhydrous Na<sub>2</sub>SO<sub>4</sub>. No further purification was necessary. Compound was prepared similarly according to the literature procedure, and their characterization data were in accordance with that previously reported.

#### Characterization Data of **2am** and **2an**

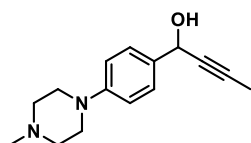

**1-(4-(4-methylpiperazin-1-yl)phenyl)but-2-yn-1-ol (2am)**: yellow solid (696 mg, yield 57%); <sup>1</sup>H NMR (500 MHz, DMSO-*d*<sub>6</sub>) δ 7.26 (d, *J* = 8.5 Hz, 2H), 6.88 (d, *J* = 9.0 Hz, 2H), 5.61 (d, *J* = 5.0 Hz, 1H), 5.18 (s, 1H), 3.10 (t, 4H), 2.44 (t, 4H), 2.21 (s, 3H), 1.82 (d, *J* = 2.5 Hz, 3H); <sup>13</sup>C NMR (126 MHz, DMSO-*d*<sub>6</sub>) δ 150.39, 133.15, 127.15, 114.92, 81.63, 80.46, 62.33, 54.55, 48.19, 45.76, 3.19.

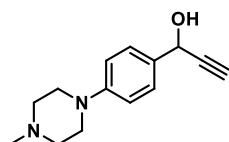

**1-(4-(4-methylpiperazin-1-yl)phenyl)prop-2-yn-1-ol (2an)**: yellow solid (921 mg, yield 80%); <sup>1</sup>H NMR (500 MHz, DMSO-*d*<sub>6</sub>) δ 7.28 (d, *J* = 8.5 Hz, 2H), 6.90 (d, *J* = 9.0 Hz, 2H), 5.80 (d, *J* = 6.0 Hz, 1H), 5.22 (dd, *J* = 5.5, 2.0 Hz, 1H), 3.42 (d, *J* = 2.5 Hz, 1H), 3.11 (t, 4H), 2.44 (t, 4H), 2.21 (s, 3H). <sup>13</sup>C NMR (126 MHz, DMSO-*d*<sub>6</sub>) δ 150.54, 132.15, 127.24, 114.92, 85.90, 75.34, 62.03, 54.53, 48.09, 45.74.

## Preparation of 1aa-D<sub>5</sub>

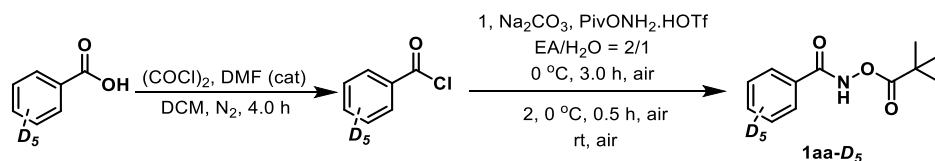

To a solution of the deuterium benzoic acid (99% Deuteration, 254.3 mg, 2.0 mmol, 1.0 eq.) in CH<sub>2</sub>Cl<sub>2</sub> (10 mL) at 0°C under nitrogen atmosphere was added dropwise oxalyl chloride (1.2 eq., 2.4 mmol, 2.0 M in CH<sub>2</sub>Cl<sub>2</sub>), then followed by a catalytic amount of DMF (2 drops). The reaction was allowed to stir at 0°C for 4.0 h until completion. The solvent was then removed under reduce pressure to afford the corresponding crude acid chloride. O-pivaloylhydroxamine triflic acid (SI-2, 534 mg, 2.0 mmol, 1.0 eq.) and Na<sub>2</sub>CO<sub>3</sub> (424 mg, 4.0 mmol, 2.0 eq.) was stirred at 0°C under air for 3.0 h in a 2:1 mixture of EtOAc (20 mL) and H<sub>2</sub>O (10 mL). The resulting solution was followed by addition of a solution unpurified acid chloride in a minimum amount of EtOAc dropwise at 0°C under air. The reaction was stirred until the acid chloride disappeared. The two layers were separated and extracted with EtOAc (40 mL x 2). The combined organic phase was dried over anhydrous Na<sub>2</sub>SO<sub>4</sub>, filtered, and evaporated under reduced pressure. The residue was purified by flash column chromatography on silica gel (petroleum ether/ethyl acetate) to obtain the product 1aa-D<sub>5</sub>. The NMR spectral data was in accordance with that previously reported.

## General Procedure for the Synthesis of Isoquinolinones 3

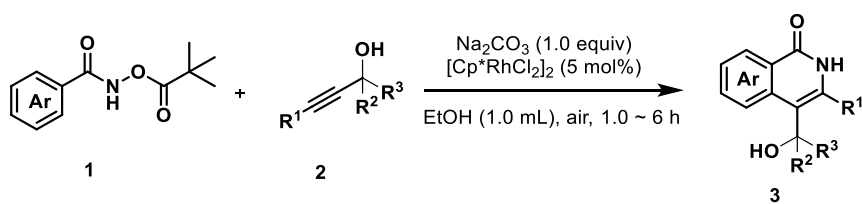

In an 8 mL reaction tube, the mixture of 1 (0.25 mmol), 2 (0.3 mmol), [Cp<sup>\*</sup>RhCl<sub>2</sub>]<sub>2</sub> (5.0 mol%) and Na<sub>2</sub>CO<sub>3</sub> (1.0 eq.) was added EtOH (1.0 mL). Then the resulting mixture was stirred for 1 ~ 6 h. When the reaction was finished, the desired product precipitated out as a solid, and the product was simply collected by filtration. For some cases, if the precipitation did not occur, the reaction mixture was subjected directly to flash chromatography on silica gel (petroleum ether/ethyl acetate) to provide the desired products 3.

#### Characterization Data of Products 3 and 4

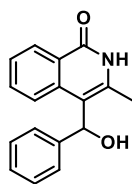

**4-(hydroxy(phenyl)methyl)-3-methylisoquinolin-1(2H)-one (3aa):** white solid (54 mg, yield 81%),  $^1\text{H}$  NMR (500 MHz,  $\text{DMSO-}d_6$ )  $\delta$  11.22 (br, 1H), 8.14 (dd,  $J = 8.0, 1.5$  Hz, 1H), 7.76 (d,  $J = 8.0$  Hz, 1H), 7.43 – 7.38 (m, 1H), 7.36 (s, 1H), 7.34 (s, 1H), 7.32 – 7.26 (m, 3H), 7.16 (t,  $J = 7.5$  Hz, 1H), 6.14 (d,  $J = 3.5$  Hz, 1H), 5.95 (d,  $J = 3.5$  Hz, 1H), 2.38 (s, 3H);  $^{13}\text{C}$  NMR (126 MHz,  $\text{DMSO-}d_6$ )  $\delta$  161.90, 144.58, 136.82, 136.37, 131.13, 128.03, 126.55, 126.15, 125.80, 125.49, 125.28, 124.88, 114.00, 68.01, 16.78; HRMS (ESI)  $m/z$  calculated for  $\text{C}_{17}\text{H}_{14}\text{NO}_2^-$  [M-H] $^-$  264.1030, found: 264.1024.

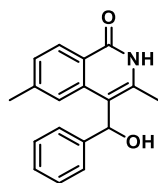

**4-(hydroxy(phenyl)methyl)-3,6-dimethylisoquinolin-1(2H)-one (3ab):** white solid (58 mg, yield 83%),  $^1\text{H}$  NMR (500 MHz,  $\text{DMSO-}d_6$ )  $\delta$  11.12 (br, 1H), 8.04 (d,  $J = 8.0$  Hz, 1H), 7.60 (s, 1H), 7.37 – 7.33 (m, 2H), 7.30 – 7.25 (m, 2H), 7.18 – 7.12 (m, 2H), 6.14 (s, 1H), 5.93 (br, 1H), 2.34 (s, 3H), 2.20 (s, 3H);  $^{13}\text{C}$  NMR (126 MHz,  $\text{DMSO-}d_6$ )  $\delta$  161.81, 144.67, 140.84, 137.01, 136.47, 127.97, 126.62, 126.36, 126.11, 125.34, 125.27, 123.24, 113.88, 67.93, 21.68, 16.84; HRMS (ESI)  $m/z$  calculated for  $\text{C}_{18}\text{H}_{16}\text{NO}_2^-$  [M-H] $^-$  278.1187, found: 278.1184.

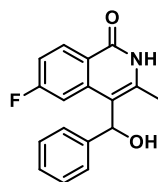

**6-fluoro-4-(hydroxy(phenyl)methyl)-3-methylisoquinolin-1(2H)-one (3ac):** white solid (51 mg, yield 55%),  $^1\text{H}$  NMR (500 MHz,  $\text{DMSO-}d_6$ )  $\delta$  11.33 (br, 1H), 8.23 – 8.15 (m, 1H), 7.46 – 7.42 (m, 1H), 7.38 – 7.34 (m, 2H), 7.32 – 7.27 (m, 2H), 7.20 – 7.12 (m, 2H), 6.16 – 6.0 (m, 2H), 2.39 (s, 3H);  $^{13}\text{C}$  NMR (126 MHz,  $\text{DMSO-}d_6$ )  $\delta$  163.47 (d,  $J = 246.8$  Hz), 161.19, 144.12, 139.21 (d,  $J =$

10.7 Hz), 138.15, 129.95 (d,  $J = 10.2$  Hz), 128.15, 126.35, 125.25, 122.41, 113.60, 113.58, 113.42 (d,  $J = 23.7$  Hz), 110.76 (d,  $J = 23.5$  Hz), 67.92, 16.75;  $^{19}\text{F}$  NMR (471 MHz,  $\text{DMSO-}d_6$ )  $\delta$  -107.49 (s); HRMS (ESI)  $m/z$  calculated for  $\text{C}_{17}\text{H}_{13}\text{FNO}_2^-$   $[\text{M-H}]^-$  282.0936, found: 282.0931.

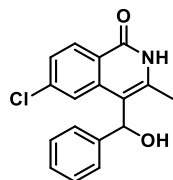

**6-chloro-4-(hydroxy(phenyl)methyl)-3-methylisoquinolin-1(2H)-one (3ad):** white solid (53 mg, yield 71%),  $^1\text{H}$  NMR (500 MHz,  $\text{DMSO-}d_6$ )  $\delta$  11.37 (s, 1H), 8.12 (d,  $J = 8.5$  Hz, 1H), 7.78 (d,  $J = 2.0$  Hz, 1H), 7.36 – 7.29 (m, 5H), 7.19 (t,  $J = 7.0$  Hz, 1H), 6.11 – 6.05 (m, 2H), 2.39 (s, 3H);  $^{13}\text{C}$  NMR (126 MHz,  $\text{DMSO-}d_6$ )  $\delta$  161.25, 144.08, 138.20, 138.16, 136.22, 128.86, 128.15, 126.38, 125.22, 125.10, 124.14, 113.19, 67.87, 16.77; HRMS (ESI)  $m/z$  calculated for  $\text{C}_{17}\text{H}_{14}\text{ClNO}_2^+$   $[\text{M+H}]^+$  300.0791, found: 300.0787.

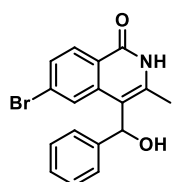

**6-bromo-4-(hydroxy(phenyl)methyl)-3-methylisoquinolin-1(2H)-one (3ae):** white solid (68 mg, yield 79%),  $^1\text{H}$  NMR (500 MHz,  $\text{DMSO-}d_6$ )  $\delta$  11.38 (br, 1H), 8.04 (d,  $J = 8.5$  Hz, 1H), 7.95 (d,  $J = 2.0$  Hz, 1H), 7.44 (dd,  $J = 8.5, 2.0$  Hz, 1H), 7.35 (d,  $J = 7.5$  Hz, 2H), 7.30 (t,  $J = 7.5$  Hz, 2H), 7.22 – 7.16 (m, 1H), 6.15 – 6.02 (m, 2H), 2.40 (s, 3H);  $^{13}\text{C}$  NMR (126 MHz,  $\text{DMSO-}d_6$ )  $\delta$  161.37, 144.08, 138.33, 138.14, 128.88, 128.22, 128.13, 127.82, 126.35, 125.47, 125.20, 124.39, 113.08, 67.84, 16.78; HRMS (ESI)  $m/z$  calculated for  $\text{C}_{17}\text{H}_{13}\text{BrNO}_2^-$   $[\text{M-H}]^-$  342.0135, found: 342.1024.

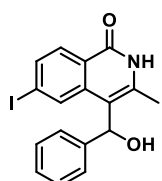

**4-(hydroxy(phenyl)methyl)-6-iodo-3-methylisoquinolin-1(2H)-one (3af):** white solid (65 mg, yield 66%),  $^1\text{H}$  NMR (500 MHz,  $\text{DMSO-}d_6$ )  $\delta$  11.35 (br, 1H), 8.18 (s, 1H), 7.85 (d,  $J = 8.0$  Hz,

1H), 7.61 (d,  $J = 8.0$  Hz, 1H), 7.35 – 7.28 (m, 4H), 7.21 – 7.17 (m, 1H), 6.25 – 5.9 (m, 1H), 2.39 (s, 3H);  $^{13}\text{C}$  NMR (126 MHz,  $\text{DMSO-}d_6$ )  $\delta$  161.65, 144.19, 138.19, 137.83, 134.60, 133.43, 128.48, 128.12, 126.35, 125.20, 124.65, 112.93, 99.93, 67.85, 16.83; HRMS (ESI)  $m/z$  calculated for  $\text{C}_{17}\text{H}_{13}\text{INO}_2^-$   $[\text{M-H}]^-$  389.9996, found: 389.9988.

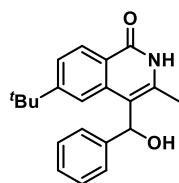

**6-(tert-butyl)-4-(hydroxy(phenyl)methyl)-3-methylisoquinolin-1(2H)-one (3ag):** white solid (56 mg, yield 70%),  $^1\text{H}$  NMR (500 MHz,  $\text{DMSO-}d_6$ )  $\delta$  11.09 (br, 1H), 8.03 (d,  $J = 8.5$  Hz, 1H), 7.72 (s, 1H), 7.40 – 7.31 (m, 3H), 7.27 (t,  $J = 7.0$  Hz, 2H), 7.15 (t,  $J = 7.0$  Hz, 1H), 6.12 (s, 1H), 5.91 (br, 1H), 2.41 (s, 3H), 1.08 (s, 9H);  $^{13}\text{C}$  NMR (126 MHz,  $\text{DMSO-}d_6$ )  $\delta$  161.74, 153.33, 144.94, 136.41, 136.14, 127.83, 126.18, 125.92, 125.13, 123.29, 122.58, 122.56, 114.39, 67.98, 34.76, 30.73, 16.71; HRMS (ESI)  $m/z$  calculated for  $\text{C}_{21}\text{H}_{22}\text{NO}_2^-$   $[\text{M-H}]^-$  320.1656, found: 320.1656.

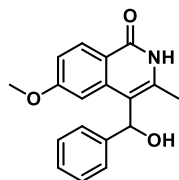

**4-(hydroxy(phenyl)methyl)-6-methoxy-3-methylisoquinolin-1(2H)-one (3ah):** white solid (42 mg, yield 59%),  $^1\text{H}$  NMR (500 MHz,  $\text{DMSO-}d_6$ )  $\delta$  11.05 (s, 1H), 8.03 (d,  $J = 9.0$  Hz, 1H), 7.39 – 7.35 (m, 2H), 7.30 – 7.26 (m, 2H), 7.19 – 7.15 (m, 2H), 6.88 (dd,  $J = 8.5, 2.5$  Hz, 1H), 6.11 (s, 1H), 5.93 (br, 1H), 3.56 (s, 3H), 2.39 (s, 3H);  $^{13}\text{C}$  NMR (126 MHz,  $\text{DMSO-}d_6$ )  $\delta$  161.51, 161.02, 144.68, 138.64, 137.08, 128.48, 127.97, 126.09, 125.18, 119.29, 113.79, 107.82, 68.00, 54.96, 16.76; HRMS (ESI)  $m/z$  calculated for  $\text{C}_{18}\text{H}_{16}\text{NO}_3^-$   $[\text{M-H}]^-$  294.1136, found: 294.1134.

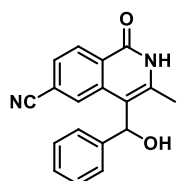



**4-(hydroxy(phenyl)methyl)-3-methyl-1-oxo-1,2-dihydroisoquinoline-6-carbonitrile (3ai):**

white solid (52 mg, yield 72%), <sup>1</sup>H NMR (500 MHz, DMSO-*d*<sub>6</sub>) δ 11.49 (br, 1H), δ 8.26 (d, *J* = 7.5 Hz, 1H), 8.14 (s, 1H), 7.65 (d, *J* = 7.5 Hz, 1H), 7.38 – 7.29 (m, 4H), 7.20 (t, *J* = 7.5 Hz, 1H), 6.50 – 5.8 (m, 2H), 2.41 (s, 3H); <sup>13</sup>C NMR (126 MHz, DMSO-*d*<sub>6</sub>) δ 161.03, 143.97, 139.02, 136.81, 130.60, 128.25, 128.06, 128.05, 126.61, 126.52, 125.26, 118.57, 113.45, 113.32, 67.80, 16.89; HRMS (ESI) *m/z* calculated for C<sub>18</sub>H<sub>13</sub>N<sub>2</sub>O<sub>2</sub><sup>-</sup> [M-H]<sup>-</sup> 289.0983, found: 289.0980.

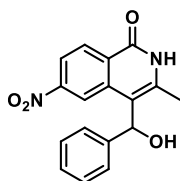

**4-(hydroxy(phenyl)methyl)-3-methyl-6-nitrosoquinolin-1(2H)-one (3aj):**

pale green solid (77 mg, yield 99%), <sup>1</sup>H NMR (500 MHz, DMSO-*d*<sub>6</sub>) δ 8.70 (d, *J* = 2.0 Hz, 1H), 8.33 (d, *J* = 8.5 Hz, 1H), 8.01 (dd, *J* = 8.5, 2.0 Hz, 1H), 7.43 – 7.38 (m, 2H), 7.32 – 7.28 (m, 2H), 7.18 (t, *J* = 7.0 Hz, 1H), 6.45 – 6.0 (m, 2H), 2.46 (s, 3H); <sup>13</sup>C NMR (126 MHz, DMSO-*d*<sub>6</sub>) δ 160.95, 148.72, 143.97, 139.33, 137.32, 129.27, 128.87, 128.20, 126.49, 125.25, 121.37, 118.43, 114.16, 67.94, 16.91; HRMS (ESI) *m/z* calculated for C<sub>17</sub>H<sub>13</sub>N<sub>2</sub>O<sub>4</sub><sup>-</sup> [M-H]<sup>-</sup> 309.0881, found: 309.0875.

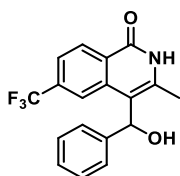

**4-(hydroxy(phenyl)methyl)-3-methyl-6-(trifluoromethyl)isoquinolin-1(2H)-one (3ak):**

pale yellow solid (65 mg, yield 78%), <sup>1</sup>H NMR (500 MHz, DMSO-*d*<sub>6</sub>) δ 11.55 (br, 1H), 8.30 (d, *J* = 8.3 Hz, 1H), 8.14 (s, 1H), 7.57 (d, *J* = 8.4 Hz, 1H), 7.39 – 7.34 (m, 2H), 7.29 (t, *J* = 7.7 Hz, 2H), 7.17 (t, *J* = 7.3 Hz, 1H), 6.30 – 5.90 (m, 2H), 2.45 (s, 3H); <sup>13</sup>C NMR (126 MHz, DMSO-*d*<sub>6</sub>) δ 161.09, 144.11, 138.34, 136.81, 128.07, 127.97, 126.34, 125.15, 124.95, 123.57, 123.24, 122.78, 120.57, 113.97, 67.87, 16.77; <sup>19</sup>F NMR (471 MHz, DMSO-*d*<sub>6</sub>) δ -60.98 (s); HRMS (ESI) *m/z* calculated for C<sub>18</sub>H<sub>13</sub>F<sub>3</sub>NO<sub>2</sub><sup>-</sup> [M-H]<sup>-</sup> 332.0904, found: 332.0899.

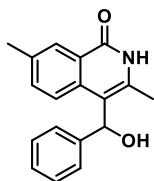

**4-(hydroxy(phenyl)methyl)-3,7-dimethylisoquinolin-1(2H)-one (3aI):** The major regioisomer was isolated from a ~8:1 mixture of regioisomers (the ratio was determined by  $^1\text{H-NMR}$  of crude products), yellow solid (54 mg, 77% yield),  $^1\text{H NMR}$  (500 MHz,  $\text{DMSO-}d_6$ )  $\delta$  11.12 (s, 1H), 7.93 (s, 1H), 7.65 (d,  $J = 8.5$  Hz, 1H), 7.35 – 7.32 (m, 2H), 7.28 – 7.21 (m, 3H), 7.15 (t,  $J = 7.0$  Hz, 1H), 6.11 (d,  $J = 3.5$  Hz, 1H), 5.95 (d,  $J = 3.5$  Hz, 1H), 2.35 (s, 3H), 2.32 (s, 3H);  $^{13}\text{C NMR}$  (126 MHz,  $\text{DMSO-}d_6$ )  $\delta$  161.84, 144.69, 135.25, 134.54, 134.25, 132.57, 128.01, 126.12, 126.05, 125.82, 125.47, 125.31, 113.99, 68.01, 20.72, 16.66; HRMS (ESI)  $m/z$  calculated for  $\text{C}_{18}\text{H}_{14}\text{NO}_2^+$   $[\text{M}+\text{H}]^+$  280.1337, found: 280.1331.

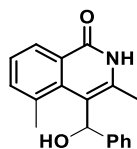

**4-(hydroxy(phenyl)methyl)-3,5-dimethylisoquinolin-1(2H)-one (3aI'):** yellow solid (7.0 mg, 10% yield),  $^1\text{H NMR}$  (500 MHz,  $\text{DMSO-}d_6$ )  $\delta$  10.14 (s, 1H), 8.02 (s, 1H), 7.64 (d,  $J = 8.5$  Hz, 1H), 7.57 (dd,  $J = 8.5, 1.5$  Hz, 1H), 7.44 – 7.40 (m, 2H), 7.33 (t,  $J = 7.5$  Hz, 2H), 7.26 (d,  $J = 7.5$  Hz, 1H), 6.34 (d,  $J = 4.5$  Hz, 1H), 5.97 (d,  $J = 4.5$  Hz, 1H), 2.43 (s, 3H), 2.19 (s, 3H);  $^{13}\text{C NMR}$  (126 MHz,  $\text{DMSO-}d_6$ )  $\delta$  161.04, 142.27, 137.91, 136.22, 135.56, 133.88, 128.31, 127.33, 126.48, 126.20, 125.05, 123.49, 106.11, 68.89, 20.81, 11.76; HRMS (ESI)  $m/z$  calculated for  $\text{C}_{18}\text{H}_{14}\text{NO}_2^+$   $[\text{M}+\text{H}]^+$  280.1337, found: 280.1329.

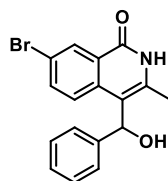

**7-bromo-4-(hydroxy(phenyl)methyl)-3-methylisoquinolin-1(2H)-one (3aIII):** The major regioisomer was isolated from a ~11:1 mixture of regioisomers (the ratio was determined by  $^1\text{H-NMR}$  of crude products), pale yellow solid (58 mg, isolated yield 67%),  $^1\text{H NMR}$  (500 MHz,

DMSO-*d*<sub>6</sub>) δ 11.43 (s, 1H), 8.22 (d, *J* = 2.5 Hz, 1H), 7.70 (d, *J* = 9.0 Hz, 1H), 7.58 (dd, *J* = 9.0, 2.5 Hz, 1H), 7.35 – 7.30 (m, 2H), 7.27 (t, *J* = 7.5 Hz, 2H), 7.17 (t, *J* = 7.5 Hz, 1H), 6.11 (d, *J* = 4.0 Hz, 1H), 6.05 (d, *J* = 4.0 Hz, 1H), 2.37 (s, 3H); <sup>13</sup>C NMR (126 MHz, DMSO-*d*<sub>6</sub>) δ 160.71, 144.20, 137.22, 135.76, 133.94, 128.65, 128.34, 128.10, 127.20, 126.29, 125.29, 117.96, 113.79, 67.86, 16.77; HRMS (ESI) *m/z* calculated for C<sub>17</sub>H<sub>13</sub>BrNO<sub>2</sub><sup>-</sup> [M-H]<sup>-</sup> 342.0135, found: 342.0137.

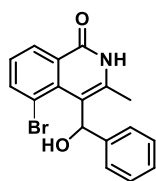

**5-bromo-4-(hydroxy(phenyl)methyl)-3-methylisoquinolin-1(2H)-one (3am')**: The minor isomer contained some inseparable impurities. <sup>1</sup>H NMR (500 MHz, DMSO-*d*<sub>6</sub>) δ 10.57 (br, 1H), 8.35 – 8.30 (m, 1H), 8.06 – 8.00 (m, 1H), 7.41 – 7.32 (m, 6H), 6.51 (d, *J* = 4.6 Hz, 1H), 5.96 (d, *J* = 4.6 Hz, 1H), 2.44 (s, 3H).

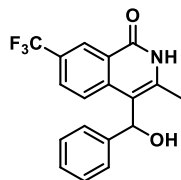

**4-(hydroxy(phenyl)methyl)-3-methyl-7-(trifluoromethyl)isoquinolin-1(2H)-one (3an)**: The major regioisomer was isolated from a ~12:1 mixture of regioisomers (the ratio was determined by <sup>1</sup>H-NMR of crude products), yellow solid (53 mg, yield 64%), <sup>1</sup>H NMR (500 MHz, DMSO-*d*<sub>6</sub>) δ 11.60 (br, 1H), 8.39 (s, 1H), 7.95 (d, *J* = 9.0 Hz, 1H), 7.73 (dd, *J* = 9.0, 2.0 Hz, 1H), 7.38 – 7.33 (m, 2H), 7.28 (t, *J* = 7.5 Hz, 2H), 7.18 (t, *J* = 7.0 Hz, 1H), 6.16 (d, *J* = 4.0 Hz, 1H), 6.11 (d, *J* = 4.0 Hz, 1H), 2.43 (s, 3H); <sup>13</sup>C NMR (126 MHz, DMSO-*d*<sub>6</sub>) δ 161.26, 144.07, 139.76, 139.60, 128.15, 127.25, 126.97 (m), 126.36, 125.32, 125.19, 124.92, 123.66 (m), 123.02, 113.88, 67.84, 16.96; <sup>19</sup>F NMR (471 MHz, DMSO-*d*<sub>6</sub>) δ -61.02; HRMS (ESI) *m/z* calculated for C<sub>18</sub>H<sub>13</sub>F<sub>3</sub>NO<sub>2</sub><sup>-</sup> [M-H]<sup>-</sup> 332.0909, found: 332.0907.

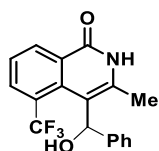

**4-(hydroxy(phenyl)methyl)-3-methyl-5-(trifluoromethyl)isoquinolin-1(2H)-one (3an')**: yellow solid (4 mg, yield 5%),  $^1\text{H}$  NMR (500 MHz,  $\text{DMSO-}d_6$ )  $\delta$  10.78 (s, 1H), 8.46 (s, 1H), 8.03 (dd,  $J = 9.0, 2.0$  Hz, 1H), 7.95 (d,  $J = 8.5$  Hz, 1H), 7.44 (d,  $J = 7.5$  Hz, 2H), 7.34 (dd,  $J = 7.5, 2.0$  Hz, 2H), 7.28 – 7.25 (m, 1H), 6.47 (d,  $J = 4.5$  Hz, 1H), 6.01 (d,  $J = 4.5$  Hz, 1H), 2.23 (s, 3H);  $^{13}\text{C}$  NMR (126 MHz,  $\text{DMSO-}d_6$ )  $\delta$  160.53, 142.17, 141.73, 141.40, 128.35, 127.47, 126.27, 125.92, 125.21, 125.16, 124.87, 123.91 (m), 106.02, 69.21, 11.72;  $^{19}\text{F}$  NMR (471 MHz,  $\text{DMSO-}d_6$ )  $\delta$  -60.86; HRMS (ESI)  $m/z$  calculated for  $\text{C}_{18}\text{H}_{13}\text{F}_3\text{NO}_2^-$   $[\text{M-H}]^-$  332.0909, found: 332.0907.

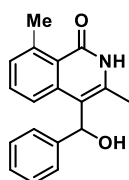

**4-(hydroxy(phenyl)methyl)-3,8-dimethylisoquinolin-1(2H)-one (3ao)**: white solid (12 mg, yield 17%),  $^1\text{H}$  NMR (500 MHz,  $\text{DMSO-}d_6$ )  $\delta$  10.96 (s, 1H), 7.59 (d,  $J = 8.5$  Hz, 1H), 7.32 (d,  $J = 8.5$  Hz, 2H), 7.26 (t,  $J = 7.5$  Hz, 2H), 7.22 – 7.18 (m, 1H), 7.15 (t,  $J = 7.5$  Hz, 1H), 7.01 (d,  $J = 7.0$  Hz, 1H), 6.09 (s, 1H), 5.98 (br, 1H), 2.76 (s, 3H), 2.34 (s, 3H);  $^{13}\text{C}$  NMR (126 MHz,  $\text{DMSO-}d_6$ )  $\delta$  162.95, 144.68, 140.06, 138.43, 136.52, 130.19, 127.98, 127.75, 126.03, 125.20, 124.00, 123.80, 113.65, 68.12, 23.72, 16.54; HRMS (ESI)  $m/z$  calculated for  $\text{C}_{18}\text{H}_{18}\text{NO}_2^+$   $[\text{M+H}]^+$  280.1337, found: 280.1325.

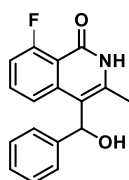

**8-fluoro-4-(hydroxy(phenyl)methyl)-3-methylisoquinolin-1(2H)-one (3ap)**: yellow solid (35 mg, yield 49%),  $^1\text{H}$  NMR (500 MHz,  $\text{DMSO-}d_6$ )  $\delta$  11.22 (s, 1H), 7.54 (d,  $J = 8.4$  Hz, 1H), 7.41 – 7.31 (m, 3H), 7.29 – 7.24 (m, 2H), 7.19 – 7.15 (m, 1H), 7.03 – 6.97 (m, 1H), 6.10 (s, 1H), 6.00 (br, 1H), 2.36 (s, 3H);  $^{13}\text{C}$  NMR (126 MHz,  $\text{DMSO-}d_6$ )  $\delta$  161.64 (d,  $J = 260.3$  Hz), 159.29 (d,  $J = 3.1$

Hz), 144.31, 139.68, 138.12, 132.12 (d,  $J = 10.6$  Hz), 128.06, 126.20, 125.22, 124.19, 121.84, 114.41 (d,  $J = 5.1$  Hz), 113.23, 111.42 (d,  $J = 21.0$  Hz), 67.94, 16.71;  $^{19}\text{F}$  NMR (471 MHz, DMSO- $d_6$ )  $\delta$  -111.34; HRMS (ESI)  $m/z$  calculated for  $\text{C}_{17}\text{H}_{15}\text{FNO}_2^+$   $[\text{M}+\text{H}]^+$  284.1087, found: 284.1076.

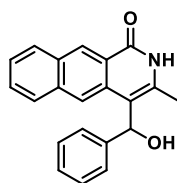

**4-(hydroxy(phenyl)methyl)-3-methylbenzo[g]isoquinolin-1(2H)-one (3aq):** yellow solid (35 mg, yield 44%),  $^1\text{H}$  NMR (500 MHz, DMSO- $d_6$ )  $\delta$  11.04 (br, 1H), 8.83 (s, 1H), 8.32 (s, 1H), 8.06 (d,  $J = 8.0$  Hz, 1H), 7.72 (d,  $J = 8.5$  Hz, 1H), 7.53 – 7.43 (m, 4H), 7.28 (t,  $J = 7.5$  Hz, 2H), 7.15 (t,  $J = 7.5$  Hz, 1H), 6.27 (s, 1H), 5.97 (br, 1H), 2.38 (s, 3H);  $^{13}\text{C}$  NMR (126 MHz, DMSO- $d_6$ )  $\delta$  162.31, 144.67, 135.36, 134.22, 132.58, 129.89, 128.86, 127.98, 127.87, 127.73, 127.50, 126.13, 125.62, 125.34, 124.48, 123.90, 113.63, 68.20, 16.95; HRMS (ESI)  $m/z$  calculated for  $\text{C}_{21}\text{H}_{16}\text{NO}_2^-$   $[\text{M}-\text{H}]^-$  314.1187, found: 314.1182.

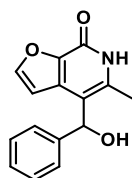

**4-(hydroxy(phenyl)methyl)-5-methylfuro[2,3-c]pyridin-7(6H)-one (3ar):** yellow solid (41 mg, yield 54%),  $^1\text{H}$  NMR (500 MHz, DMSO- $d_6$ )  $\delta$  11.39 (br, 1H), 7.89 (d,  $J = 2.0$  Hz, 1H), 7.37 – 7.32 (m, 2H), 7.29 (t,  $J = 7.5$  Hz, 2H), 7.19 (t,  $J = 7.5$  Hz, 1H), 6.63 (d,  $J = 2.0$  Hz, 1H), 6.10 – 5.62 (m, 2H), 2.32 (s, 3H);  $^{13}\text{C}$  NMR (126 MHz, DMSO- $d_6$ )  $\delta$  152.67, 147.98, 144.18, 141.73, 135.28, 133.53, 128.00, 126.50, 125.70, 113.31, 107.95, 68.46, 15.81; HRMS (ESI)  $m/z$  calculated for  $\text{C}_{15}\text{H}_{14}\text{NO}_3^+$   $[\text{M}+\text{H}]^+$  256.0973, found: 256.0969.

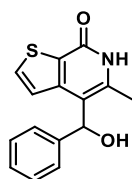

**4-(hydroxy(phenyl)methyl)-5-methylthieno[2,3-c]pyridin-7(6H)-one (3as):** white solid (64 mg, yield 94%),  $^1\text{H}$  NMR (500 MHz,  $\text{DMSO-}d_6$ )  $\delta$  11.40 (br, 1H), 7.79 (d,  $J = 5.5$  Hz, 1H), 7.37 – 7.33 (m, 2H), 7.30 – 7.25 (m, 3H), 7.18 (t,  $J = 7.0$  Hz, 1H), 6.20 – 5.65 (m, 2H), 2.37 (s, 3H);  $^{13}\text{C}$  NMR (126 MHz,  $\text{DMSO-}d_6$ )  $\delta$  158.23, 145.83, 144.29, 136.87, 132.42, 128.00, 127.79, 126.35, 125.53, 125.25, 115.49, 68.24, 16.09; HRMS (ESI)  $m/z$  calculated for  $\text{C}_{15}\text{H}_{13}\text{NO}_2\text{S}^+$   $[\text{M}+\text{H}]^+$  272.0745, found: 272.0740.

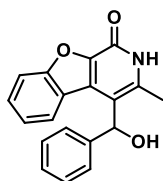

**4-(hydroxy(phenyl)methyl)-3-methylbenzofuro[2,3-c]pyridin-1(2H)-one (3at):** white solid (47 mg, yield 62%),  $^1\text{H}$  NMR (500 MHz,  $\text{DMSO-}d_6$ )  $\delta$  11.82 (br, 1H), 7.97 (d,  $J = 8.0$  Hz, 1H), 7.66 (d,  $J = 8.5$  Hz, 1H), 7.43 (t,  $J = 7.5$  Hz, 1H), 7.38 – 7.35 (m, 2H), 7.27 (t,  $J = 7.5$  Hz, 2H), 7.19 – 7.11 (m, 2H), 6.40 – 5.75 (m, 2H), 2.38 (s, 3H);  $^{13}\text{C}$  NMR (126 MHz,  $\text{DMSO-}d_6$ )  $\delta$  155.94, 153.61, 143.15, 142.98, 136.65, 129.11, 128.11, 126.86, 126.61, 125.96, 122.67, 122.60, 113.41, 111.83, 68.02, 16.42; HRMS (ESI)  $m/z$  calculated for  $\text{C}_{19}\text{H}_{14}\text{NO}_3^-$   $[\text{M}-\text{H}]^-$  304.0979, found: 304.0973.

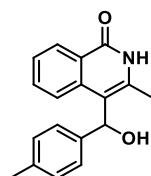

**4-(hydroxy(p-tolyl)methyl)-3-methylisoquinolin-1(2H)-one (3au):** white solid (57 mg, yield 82%),  $^1\text{H}$  NMR (500 MHz,  $\text{DMSO-}d_6$ )  $\delta$  11.20 (br, 1H), 8.13 (dd,  $J = 8.0, 1.2$  Hz, 1H), 7.76 (d,  $J = 8.3$  Hz, 1H), 7.46 – 7.37 (m, 1H), 7.33 – 7.26 (m, 1H), 7.24 – 7.20 (m, 2H), 7.10 – 7.06 (m, 2H), 6.08 (s, 1H), 5.94 (br, 1H), 2.36 (s, 3H), 2.23 (s, 3H);  $^{13}\text{C}$  NMR (126 MHz,  $\text{DMSO-}d_6$ )  $\delta$  161.86, 141.53, 136.83, 136.17, 135.02, 131.07, 128.60, 126.49, 125.87, 125.46, 125.21, 124.83, 114.04, 67.87, 20.56, 16.73; HRMS (ESI)  $m/z$  calculated for  $\text{C}_{18}\text{H}_{18}\text{NO}_2^+$   $[\text{M}+\text{H}]^+$  280.1337, found: 280.1328.

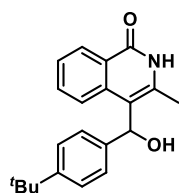

**4-((4-(tert-butyl)phenyl)(hydroxy)methyl)-3-methylisoquinolin-1(2H)-one (3av):** white solid (65 mg, yield 81%),  $^1\text{H}$  NMR (500 MHz,  $\text{DMSO-}d_6$ )  $\delta$  11.21 (br, 1H), 8.14 (d,  $J = 7.0$  Hz, 1H), 7.81 (d,  $J = 8.5$  Hz, 1H), 7.45 – 7.40 (m, 1H), 7.32 – 7.24 (m, 5H), 6.09 (s, 1H), 5.93 (br, 1H), 2.36 (s, 3H), 1.23 (s, 9H);  $^{13}\text{C}$  NMR (126 MHz,  $\text{DMSO-}d_6$ )  $\delta$  161.85, 148.33, 141.46, 136.88, 136.11, 131.13, 126.50, 125.88, 125.45, 125.01, 124.84, 124.76, 113.98, 67.92, 34.04, 31.16, 16.74; HRMS (ESI)  $m/z$  calculated for  $\text{C}_{21}\text{H}_{22}\text{NO}_2^-$   $[\text{M-H}]^-$  320.1656, found: 320.1660.

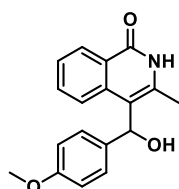

**4-(hydroxy(4-methoxyphenyl)methyl)-3-methylisoquinolin-1(2H)-one (3aw):** white solid (63 mg, yield 85%),  $^1\text{H}$  NMR (500 MHz,  $\text{DMSO-}d_6$ )  $\delta$  11.20 (br, 1H), 8.14 (dd,  $J = 7.5, 1.0$  Hz, 1H), 7.77 (d,  $J = 8.0$  Hz, 1H), 7.43 – 7.39 (m, 1H), 7.32 – 7.28 (m, 1H), 7.23 (d,  $J = 8.5$  Hz, 2H), 6.85 – 6.81 (m, 2H), 6.07 (s, 1H), 5.87 (br, 1H), 3.69 (s, 3H), 2.35 (s, 3H);  $^{13}\text{C}$  NMR (126 MHz,  $\text{DMSO-}d_6$ )  $\delta$  161.86, 157.64, 136.86, 136.36, 136.11, 131.06, 126.49, 126.43, 125.89, 125.48, 124.82, 114.01, 113.40, 67.69, 54.91, 16.72; HRMS (ESI)  $m/z$  calculated for  $\text{C}_{18}\text{H}_{16}\text{NO}_3^-$   $[\text{M-H}]^-$  294.1136, found: 294.1135.

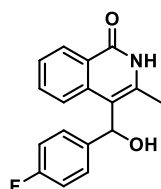

**4-((4-fluorophenyl)(hydroxy)methyl)-3-methylisoquinolin-1(2H)-one (3ax):** white solid (55 mg, yield 78%),  $^1\text{H}$  NMR (500 MHz,  $\text{DMSO-}d_6$ )  $\delta$  11.23 (br, 1H), 8.16 – 8.13 (m, 1H), 7.71 (d,  $J = 8.0$  Hz, 1H), 7.44 – 7.40 (m, 1H), 7.37 – 7.34 (m, 2H), 7.30 (t,  $J = 7.5$  Hz, 1H), 7.12 – 7.08 (m, 2H), 6.20 – 5.80 (m, 2H), 2.37 (s, 3H);  $^{13}\text{C}$  NMR (126 MHz,  $\text{DMSO-}d_6$ )  $\delta$  161.84, 160.75 (d,  $J = 242.0$  Hz), 140.64, 136.67, 136.49, 131.16, 127.21 (d,  $J = 8.1$  Hz), 126.58, 125.64, 125.50, 124.90,

114.69 (d,  $J = 21.0$  Hz), 113.63, 67.58, 16.71;  $^{19}\text{F}$  NMR (471 MHz,  $\text{DMSO-}d_6$ )  $\delta$  -117.32. HRMS (ESI)  $m/z$  calculated for  $\text{C}_{17}\text{H}_{13}\text{FNO}_2^-$   $[\text{M-H}]^-$  282.0936, found: 282.0935.

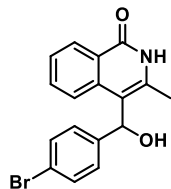

**4-((4-bromophenyl)(hydroxymethyl)-3-methylisoquinolin-1(2H)-one (3ay):** white solid (74 mg, yield 82%),  $^1\text{H}$  NMR (500 MHz,  $\text{DMSO-}d_6$ )  $\delta$  11.25 (br, 1H), 8.14 (dd,  $J = 8.0, 1.5$  Hz, 1H), 7.69 (d,  $J = 8.5$  Hz, 1H), 7.48 – 7.40 (m, 3H), 7.33 – 7.28 (m, 3H), 6.25 – 5.90 (m, 2H), 2.37 (s, 3H);  $^{13}\text{C}$  NMR (126 MHz,  $\text{DMSO-}d_6$ )  $\delta$  161.86, 144.14, 136.67, 136.59, 131.25, 130.88, 127.68, 126.61, 125.55, 125.49, 124.95, 119.24, 113.42, 67.62, 30.68, 16.73; HRMS (ESI)  $m/z$  calculated for  $\text{C}_{17}\text{H}_{13}\text{BrNO}_2^-$   $[\text{M-H}]^-$  342.0135, found: 342.0134.

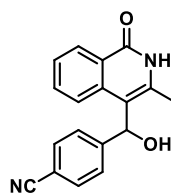

**4-(hydroxy(3-methyl-1-oxo-1,2-dihydroisoquinolin-4-yl)methyl)benzotrile (3az):** pale red solid (68 mg, yield 97%),  $^1\text{H}$  NMR (500 MHz,  $\text{DMSO-}d_6$ )  $\delta$  11.28 (br, 1H), 8.14 (dd,  $J = 8.0, 1.0$  Hz, 1H), 7.74 (d,  $J = 8.5$  Hz, 2H), 7.62 (d,  $J = 8.5$  Hz, 1H), 7.54 (d,  $J = 8.0$  Hz, 2H), 7.42 (t,  $J = 7.5$  Hz, 1H), 7.31 (t,  $J = 7.5$  Hz, 1H), 6.40 – 6.10 (m, 2H), 2.38 (s, 3H);  $^{13}\text{C}$  NMR (126 MHz,  $\text{DMSO-}d_6$ )  $\delta$  161.83, 150.68, 137.10, 136.43, 132.05, 131.36, 126.69, 126.39, 125.46, 125.28, 125.03, 118.94, 113.06, 108.99, 67.87, 16.75; HRMS (ESI)  $m/z$  calculated for  $\text{C}_{18}\text{H}_{13}\text{N}_2\text{O}_2^-$   $[\text{M-H}]^-$  289.0983, found: 289.0980.

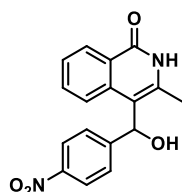

**4-(hydroxy(3-methyl-1-oxo-1,2-dihydroisoquinolin-4-yl)methyl)benzotrile (3ba):** yellow solid (30 mg, yield 38%),  $^1\text{H}$  NMR (500 MHz,  $\text{DMSO-}d_6$ )  $\delta$  11.30 (br, 1H), 8.17 – 8.14 (m, 3H),



7.69 – 7.60 (m, 3H), 7.44 – 7.40 (m, 1H), 7.31 (t,  $J = 7.0$  Hz, 1H), 6.41 – 6.05 (m, 2H), 2.40 (s, 3H);  $^{13}\text{C}$  NMR (126 MHz,  $\text{DMSO-}d_6$ )  $\delta$  161.85, 152.90, 146.07, 137.17, 136.41, 131.44, 127.67, 126.65, 125.48, 125.23, 125.09, 123.30, 113.07, 67.91, 16.77; HRMS (ESI)  $m/z$  calculated for  $\text{C}_{17}\text{H}_{13}\text{N}_2\text{O}_4^-$  [M-H] $^-$  309.0881, found: 309.0875.

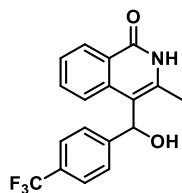

**4-(hydroxy(phenyl)methyl)-3-methyl-6-(trifluoromethyl)isoquinolin-1(2H)-one (3bb):** white solid (34 mg, yield 41%),  $^1\text{H}$  NMR (500 MHz,  $\text{DMSO-}d_6$ )  $\delta$  11.28 (br, 1H), 8.15 (dd,  $J = 8.0, 1.5$  Hz, 1H), 7.68 – 7.63 (m, 3H), 7.57 (d,  $J = 8.0$  Hz, 2H), 7.44 – 7.40 (m, 1H), 7.33 – 7.29 (m, 1H), 6.19 (br, 2H), 2.39 (s, 3H);  $^{13}\text{C}$  NMR (126 MHz,  $\text{DMSO-}d_6$ )  $\delta$  161.88, 149.59, 136.93, 136.54, 131.36, 127.04, 126.68, 126.14, 125.50, 125.40, 125.03, 124.97 (m), 123.32, 113.33, 67.83, 16.76;  $^{19}\text{F}$  NMR (471 MHz,  $\text{DMSO-}d_6$ )  $\delta$  -60.69; HRMS (ESI)  $m/z$  calculated for  $\text{C}_{18}\text{H}_{13}\text{F}_3\text{NO}_2^-$  [M-H] $^-$  332.0904, found: 332.0898.

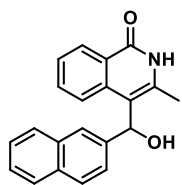

**4-(hydroxy(naphthalen-2-yl)methyl)-3-methylisoquinolin-1(2H)-one (3bc):** yellow solid (75 mg, yield 95%),  $^1\text{H}$  NMR (500 MHz,  $\text{DMSO-}d_6$ )  $\delta$  11.28 (br, 1H), 8.15 (dd,  $J = 8.0, 1.5$  Hz, 1H), 7.97 (s, 1H), 7.88 (d,  $J = 7.0$  Hz, 1H), 7.84 – 7.78 (m, 3H), 7.46 – 7.44 (m, 3H), 7.38 – 7.34 (m, 1H), 7.27 (t,  $J = 7.0$  Hz, 1H), 6.30 (s, 1H), 6.13 (br, 1H), 2.44 (s, 3H);  $^{13}\text{C}$  NMR (126 MHz,  $\text{DMSO-}d_6$ )  $\delta$  161.93, 142.32, 136.86, 136.62, 132.84, 131.79, 131.16, 127.84, 127.55, 127.39, 126.56, 125.97, 125.66, 125.50, 125.43, 124.87, 124.19, 123.39, 113.83, 68.19, 16.86; HRMS (ESI)  $m/z$  calculated for  $\text{C}_{21}\text{H}_{16}\text{NO}_2^-$  [M-H] $^-$  314.1187, found: 314.1186.

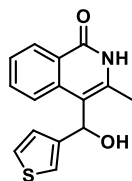

**4-(hydroxy(thiophen-3-yl)methyl)-3-methylisoquinolin-1(2H)-one (3bd):** white solid (55 mg, yield 81%),  $^1\text{H}$  NMR (500 MHz,  $\text{DMSO-}d_6$ )  $\delta$  11.19 (br, 1H), 8.14 (dd,  $J = 8.0, 1.5$  Hz, 1H), 7.91 (d,  $J = 8.5$  Hz, 1H), 7.48 – 7.43 (m, 1H), 7.40 – 7.38 (m, 1H), 7.32 (t,  $J = 7.0$  Hz, 1H), 7.23 – 7.22 (m, 1H), 6.88 (dd,  $J = 5.0, 1.0$  Hz, 1H), 6.11 (s, 1H), 5.93 (br, 1H), 2.36 (s, 3H);  $^{13}\text{C}$  NMR (126 MHz,  $\text{DMSO-}d_6$ )  $\delta$  161.85, 146.43, 136.90, 135.80, 131.10, 126.48, 126.34, 125.93, 125.64, 125.38, 124.86, 119.92, 113.78, 66.57, 16.64; HRMS (ESI)  $m/z$  calculated for  $\text{C}_{15}\text{H}_{12}\text{NO}_2\text{S}^-$  [M-H] $^-$  270.0594, found: 270.0591.

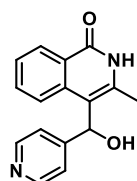

**4-(hydroxy(pyridin-4-yl)methyl)-3-methylisoquinolin-1(2H)-one (3be):** yellow solid (66 mg, yield 83%),  $^1\text{H}$  NMR (500 MHz,  $\text{DMSO-}d_6$ )  $\delta$  11.28 (s, 1H), 8.45 (d,  $J = 5.0$  Hz, 2H), 8.15 (d,  $J = 7.1$  Hz, 1H), 7.64 (d,  $J = 8.5$  Hz, 1H), 7.45 – 7.40 (m, 1H), 7.38 – 7.28 (m, 3H), 6.21 (br, 1H), 6.11 (s, 1H), 2.38 (s, 3H);  $^{13}\text{C}$  NMR (126 MHz,  $\text{DMSO-}d_6$ )  $\delta$  161.86, 153.75, 149.37, 137.13, 136.44, 131.36, 126.69, 125.45, 125.28, 125.05, 120.68, 112.89, 67.30, 16.76; HRMS (ESI)  $m/z$  calculated for  $\text{C}_{16}\text{H}_{13}\text{N}_2\text{O}_2^-$  [M-H] $^-$  265.0983, found: 265.0981.

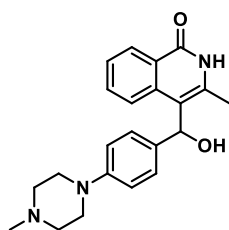

**4-(hydroxy(4-(4-methylpiperazin-1-yl)phenyl)methyl)-3-methylisoquinolin-1(2H)-one (3bf):** white solid (43 mg, yield 47%),  $^1\text{H}$  NMR (500 MHz,  $\text{DMSO-}d_6$ )  $\delta$  11.18 (br, 1H), 8.15 – 8.12 (m, 1H), 7.80 (d,  $J = 8.5$  Hz, 1H), 7.44 – 7.39 (m, 1H), 7.30 (t,  $J = 7.5$  Hz, 1H), 7.15 (d,  $J = 8.5$  Hz, 2H), 6.83 (d,  $J = 9.0$  Hz, 2H), 6.05 (s, 1H), 5.81 (br, 1H), 3.06 – 3.03 (m, 4H), 2.51 – 2.39 (m, 4H),

2.35 (s, 3H), 2.19 (s, 3H);  $^{13}\text{C}$  NMR (126 MHz,  $\text{DMSO-}d_6$ )  $\delta$  161.86, 149.37, 136.95, 135.93, 134.64, 131.03, 126.46, 125.99, 125.96, 125.45, 124.79, 115.02, 114.13, 67.75, 54.63, 48.16, 45.75, 16.72; HRMS (ESI)  $m/z$  calculated for  $\text{C}_{22}\text{H}_{24}\text{N}_3\text{O}_2^-$  [M-H] $^-$  362.1874, found: 362.1870.

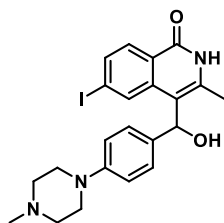

**4-(hydroxy(4-(4-methylpiperazin-1-yl)phenyl)methyl)-6-iodo-3-methylisoquinolin-1(2H)-one**

**(3bg):** white solid (70 mg, yield 72%),  $^1\text{H}$  NMR (500 MHz,  $\text{DMSO-}d_6$ )  $\delta$  11.32 (br, 1H), 8.26 (d,  $J = 1.5$  Hz, 1H), 7.86 (d,  $J = 8.5$  Hz, 1H), 7.62 (dd,  $J = 8.0, 1.5$  Hz, 1H), 7.14 (d,  $J = 8.5$  Hz, 2H), 6.85 (d,  $J = 9.0$  Hz, 2H), 6.00 (s, 1H), 5.87 (br, 1H), 3.08 – 3.05 (m, 4H), 2.42 – 2.39 (m, 4H), 2.35 (s, 3H), 2.19 (s, 3H);  $^{13}\text{C}$  NMR (126 MHz,  $\text{DMSO-}d_6$ )  $\delta$  161.61, 149.48, 138.37, 137.35, 134.77, 134.13, 133.37, 128.42, 125.90, 124.63, 115.01, 113.10, 99.93, 67.65, 54.61, 48.13, 45.77, 16.78; HRMS (ESI)  $m/z$  calculated for  $\text{C}_{22}\text{H}_{23}\text{IN}_3\text{O}_2^-$  [M-H] $^-$  488.0840, found: 488.0850.

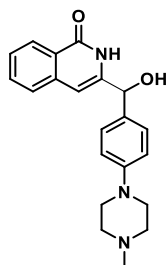

**3-(hydroxy(4-(4-methylpiperazin-1-yl)phenyl)methyl)isoquinolin-1(2H)-one (3bh):**

yellow solid (39 mg, yield 45%),  $^1\text{H}$  NMR (500 MHz,  $\text{DMSO-}d_6$ )  $\delta$  10.97 (br, 1H), 8.10 (d,  $J = 8.0$  Hz, 1H), 7.67 – 7.61 (m, 2H), 7.42 – 7.39 (m, 1H), 7.29 (d,  $J = 8.5$  Hz, 2H), 6.88 (d,  $J = 8.5$  Hz, 2H), 6.57 (s, 1H), 5.43 (s, 1H), 3.10 – 3.07 (m, 4H), 2.43 – 2.40 (m, 4H), 2.19 (s, 3H);  $^{13}\text{C}$  NMR (126 MHz,  $\text{DMSO-}d_6$ )  $\delta$  162.09, 150.47, 145.66, 137.87, 132.68, 132.40, 127.43, 126.55, 126.31, 125.82, 124.70, 114.91, 100.24, 70.83, 54.54, 48.07, 45.75; HRMS (ESI)  $m/z$  calculated for  $\text{C}_{21}\text{H}_{22}\text{N}_3\text{O}_2^-$  [M-H] $^-$  348.1718, found: 348.1717.

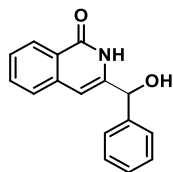

**3-(hydroxy(phenyl)methyl)isoquinolin-1(2H)-one (3bi):** yellow oil (42 mg, yield 63%),  $^1\text{H}$  NMR (500 MHz,  $\text{DMSO-}d_6$ )  $\delta$  11.06 (br, 1H), 8.11 (d,  $J = 8.0$  Hz, 1H), 7.68 – 7.63 (m, 2H), 7.50 – 7.48 (m, 2H), 7.45 – 7.41 (m, 1H), 7.36 – 7.32 (m, 2H), 7.28 – 7.24 (m, 1H), 6.60 (s, 1H), 6.20 (br, 1H), 5.54 (s, 1H);  $^{13}\text{C}$  NMR (126 MHz,  $\text{DMSO-}d_6$ )  $\delta$  162.24, 145.20, 142.57, 137.86, 132.59, 128.25, 127.61, 126.72, 126.66, 126.47, 126.10, 124.84, 100.85, 71.21; HRMS (ESI)  $m/z$  calculated for  $\text{C}_{16}\text{H}_{14}\text{NO}_2^+$   $[\text{M}+\text{H}]^+$  252.1024, found: 252.1019.

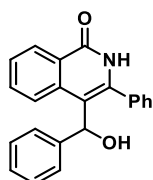

**4-(hydroxy(phenyl)methyl)-3-phenylisoquinolin-1(2H)-one (3bj):** yellow solid (51 mg, yield 95%),  $^1\text{H}$  NMR (500 MHz,  $\text{DMSO-}d_6$ )  $\delta$  11.40 (s, 1H), 8.24 (dd,  $J = 8.0, 1.0$  Hz, 1H), 7.79 (d,  $J = 8.0$  Hz, 1H), 7.69 – 7.60 (m, 2H), 7.52 – 7.46 (m, 3H), 7.46 – 7.41 (m, 1H), 7.40 – 7.34 (m, 3H), 7.25 (t,  $J = 7.5$  Hz, 2H), 7.14 (t,  $J = 7.5$  Hz, 1H), 6.08 (br, 1H), 5.71 (s, 1H);  $^{13}\text{C}$  NMR (126 MHz,  $\text{DMSO-}d_6$ )  $\delta$  161.65, 144.50, 140.07, 136.20, 134.51, 131.18, 129.35, 129.00, 128.41, 128.06, 127.17, 126.69, 126.52, 126.18, 125.79, 125.24, 114.00, 69.20; HRMS (ESI)  $m/z$  calculated for  $\text{C}_{22}\text{H}_{16}\text{NO}_2^-$   $[\text{M}-\text{H}]^-$  326.1187, found: 326.1191.

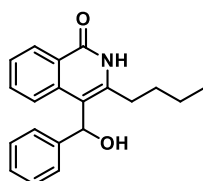

**3-butyl-4-(hydroxy(phenyl)methyl)isoquinolin-1(2H)-one (3bk):** yellow solid (51 mg, yield 70%),  $^1\text{H}$  NMR (500 MHz,  $\text{DMSO-}d_6$ )  $\delta$  11.21 (br, 1H), 8.14 (d,  $J = 7.8$  Hz, 1H), 7.68 (d,  $J = 8.3$  Hz, 1H), 7.40 – 7.32 (m, 3H), 7.30 – 7.23 (m, 3H), 7.16 (t,  $J = 7.1$  Hz, 1H), 6.10 (s, 1H), 6.04 (br, 1H), 2.75 – 2.62 (m, 2H), 1.65 – 1.53 (m, 2H), 1.39 – 1.30 (m, 2H), 0.87 (t,  $J = 7.3$  Hz, 3H);  $^{13}\text{C}$  NMR (126 MHz,  $\text{DMSO-}d_6$ )  $\delta$  162.04, 144.84, 140.92, 136.84, 130.97, 128.02, 126.48, 126.15,

126.27, 125.65, 125.31, 124.92, 113.29, 67.74, 31.69, 27.03, 22.07, 13.70; HRMS (ESI)  $m/z$  calculated for  $C_{20}H_{20}NO_2^-$   $[M-H]^-$  306.1500, found: 306.1497.

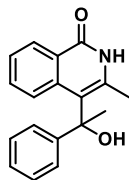

**4-(1-hydroxy-1-phenylethyl)-3-methylisoquinolin-1(2H)-one (3bl):** yellow solid (51 mg, yield 70%),  $^1H$  NMR (500 MHz, DMSO- $d_6$ )  $\delta$  9.99 (s, 1H), 8.27 (dd,  $J = 8.0, 0.5$  Hz, 1H), 7.74 – 7.70 (m, 1H), 7.65 (d,  $J = 8.5$  Hz, 1H), 7.50 (t,  $J = 7.5$  Hz, 1H), 7.44 – 7.40 (m, 2H), 7.35 (t,  $J = 7.5$  Hz, 2H), 7.29 (t,  $J = 7.5$  Hz, 1H), 6.66 (s, 1H), 1.92 (s, 3H), 1.75 (s, 3H);  $^{13}C$  NMR (126 MHz, DMSO- $d_6$ )  $\delta$  160.23, 145.51, 142.04, 139.30, 132.54, 128.29, 127.44, 126.81, 126.12, 125.85, 124.91, 123.18, 105.06, 72.83, 26.67, 12.89; HRMS (ESI)  $m/z$  calculated for  $C_{18}H_{18}NO_2^+$   $[M+H]^+$  280.1337, found: 280.1329.

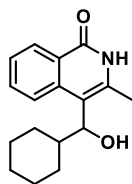

**4-(cyclohexyl(hydroxy)methyl)-3-methylisoquinolin-1(2H)-one (3bm):** white solid (55 mg, yield 81%),  $^1H$  NMR (500 MHz, DMSO- $d_6$ )  $\delta$  11.06 (s, 1H), 8.39 – 8.15 (m, 2H), 7.68 – 7.58 (m, 1H), 7.42 – 7.35 (m, 1H), 5.17 (br, 1H), 4.54 (br, 1H), 2.26 (s, 3H), 1.99 – 1.83 (m, 1H), 1.76 – 1.72 (m, 1H), 1.62 – 1.49 (m, 2H), 1.30 – 0.9 (m, 6H), 0.88 – 0.75 (m, 1H);  $^{13}C$  NMR (126 MHz, DMSO- $d_6$ )  $\delta$  161.66, 137.29, 131.24, 126.69, 125.40, 124.89, 113.40, 73.18, 42.69, 30.46, 29.16, 26.04, 25.74, 25.63, 17.15.; HRMS (ESI)  $m/z$  calculated for  $C_{17}H_{22}NO_2^+$   $[M+H]^+$  272.1651, found: 272.1645.

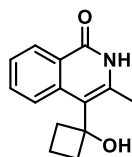

**4-(1-hydroxycyclobutyl)-3-methylisoquinolin-1(2H)-one (3bn):** white solid (30 mg, yield 53%),  $^1H$  NMR (500 MHz, DMSO- $d_6$ )  $\delta$  10.98 (s, 1H), 8.16 (dd,  $J = 8.0, 1.5$  Hz, 1H), 7.81 (d,  $J = 8.0$  Hz,

1H), 7.63 – 7.59 (m, 1H), 7.40 – 7.36 (m, 1H), 5.48 (br, 1H), 2.56 – 2.53 (m, 2H), 2.47 – 2.42 (m, 2H), 2.26 – 2.18 (m, 4H), 1.75 – 1.67 (m, 1H); <sup>13</sup>C NMR (126 MHz, DMSO-*d*<sub>6</sub>) δ 161.59, 137.28, 135.46, 131.19, 126.58, 124.88, 124.78, 124.75, 117.57, 76.78, 38.90, 18.27, 16.46; HRMS (ESI) *m/z* calculated for C<sub>14</sub>H<sub>14</sub>NO<sub>2</sub><sup>-</sup> [M-H]<sup>-</sup> 228.1030, found: 228.1024.

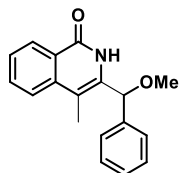

**3-(methoxy(phenyl)methyl)-4-methylisoquinolin-1(2H)-one (4a):** yellow solid (30 mg, yield 43%), <sup>1</sup>H NMR (500 MHz, CDCl<sub>3</sub>) δ 11.39 (br, 1H), 8.43 (d, *J* = 7.0 Hz, 1H), 7.65 (d, *J* = 8.0 Hz, 1H), 7.48 – 7.44 (m, 1H), 7.40 – 7.36 (m, 2H), 7.34 – 7.30 (m, 2H), 7.29 – 7.24 (m, 3H), 2.63 (s, 3H), 2.18 (s, 3H); <sup>13</sup>C NMR (126 MHz, CDCl<sub>3</sub>) δ 164.19, 139.14, 138.40, 136.77, 132.17, 128.57, 127.50, 125.65, 125.58, 125.29, 125.23, 110.99, 71.66, 21.09, 17.78; HRMS (ESI) *m/z* calculated for C<sub>18</sub>H<sub>18</sub>NO<sub>2</sub><sup>+</sup> [M+H]<sup>+</sup> 280.1338, found: 280.1329.

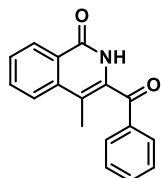

**3-benzoyl-4-methylisoquinolin-1(2H)-one (4b):** yellow solid (51 mg, yield 78%), <sup>1</sup>H NMR (500 MHz, DMSO-*d*<sub>6</sub>) δ 11.64 (s, 1H), 8.24 (dd, *J* = 8.0, 1.0 Hz, 1H), 7.84 (dd, *J* = 8.0, 2.0 Hz, 2H), 7.70 – 7.66 (m, 1H), 7.60 – 7.55 (m, 1H), 7.53 (t, *J* = 8.0 Hz, 2H), 7.48 – 7.44 (m, 1H), 7.10 (d, *J* = 8.0 Hz, 1H), 2.05 (s, 3H); <sup>13</sup>C NMR (126 MHz, DMSO-*d*<sub>6</sub>) δ 196.01, 161.76, 138.14, 137.75, 135.83, 134.05, 132.72, 129.31, 129.19, 126.97, 126.05, 124.06, 123.71, 113.41, 17.34; HRMS (ESI) *m/z* calculated for C<sub>17</sub>H<sub>14</sub>NO<sub>2</sub><sup>+</sup> [M+H]<sup>+</sup> 264.1025, found: 264.1019.

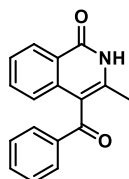

**4-benzoyl-3-methylisoquinolin-1(2H)-one (4b')**: yellow solid (9 mg, yield 14%), <sup>1</sup>H NMR (500 MHz, CDCl<sub>3</sub>) δ 9.47 (br, 1H), 8.49 (d, *J* = 7.5 Hz, 1H), 7.85 (d, *J* = 7.5 Hz, 2H), 7.82 – 7.77 (m, 2H), 7.68 – 7.60 (m, 2H), 7.51 (t, *J* = 7.5 Hz, 2H), 2.21 (s, 3H); <sup>13</sup>C NMR (126 MHz, CDCl<sub>3</sub>) δ 192.00, 161.69, 137.70, 137.11, 133.98, 133.02, 132.50, 129.61, 128.98, 128.50, 128.01, 127.17, 124.57, 115.27, 14.80; HRMS (ESI) *m/z* calculated for C<sub>17</sub>H<sub>14</sub>NO<sub>2</sub><sup>+</sup> [M+H]<sup>+</sup> 264.1025, found: 264.1018.

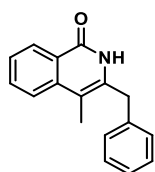

**3-benzyl-4-methylisoquinolin-1(2H)-one (4c)**: white solid (yield 27%), <sup>1</sup>H NMR (500 MHz, DMSO-*d*<sub>6</sub>) δ 11.27 (s, 1H), 8.21 (d, *J* = 8.1 Hz, 1H), 7.76 – 7.68 (m, 2H), 7.49 – 7.42 (m, 1H), 7.33 – 7.27 (m, 2H), 7.26 – 7.23 (m, 2H), 7.20 (t, *J* = 7.1 Hz, 1H), 3.99 (s, 2H), 2.22 (s, 3H); <sup>13</sup>C NMR (126 MHz, DMSO-*d*<sub>6</sub>) δ 161.76, 138.51, 138.45, 136.83, 132.42, 128.51, 128.10, 126.80, 126.31, 125.59, 124.95, 123.29, 107.19, 35.70, 12.30; HRMS (ESI) *m/z* calculated for C<sub>17</sub>H<sub>16</sub>NO<sup>+</sup> [M+H]<sup>+</sup> 250.1232, found: 250.1221.

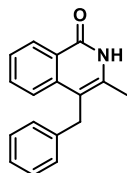

**4-benzyl-3-methylisoquinolin-1(2H)-one (4c')**: white solid (yield 45%), <sup>1</sup>H NMR (500 MHz, DMSO-*d*<sub>6</sub>) δ 11.27 (s, 1H), 8.21 – 8.16 (m, 1H), 7.62 – 7.50 (m, 2H), 7.43 – 7.33 (m, 1H), 7.28 – 7.21 (m, 2H), 7.18 – 7.13 (m, 3H), 4.07 (s, 2H), 2.29 (s, 3H); <sup>13</sup>C NMR (126 MHz, DMSO-*d*<sub>6</sub>) δ 161.73, 140.19, 138.01, 136.37, 132.30, 128.45, 127.69, 126.90, 125.90, 125.11, 124.99, 123.29, 109.22, 31.38, 16.65; HRMS (ESI) *m/z* calculated for C<sub>17</sub>H<sub>16</sub>NO<sup>+</sup> [M+H]<sup>+</sup> 250.1232, found: 250.1223.

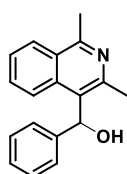

**(1,3-dimethylisoquinolin-4-yl)(phenyl)methanol (4d):** white solid (yield 72%),  $^1\text{H}$  NMR (500 MHz,  $\text{DMSO-}d_6$ )  $\delta$  8.16 – 8.10 (m, 2H), 7.53 – 7.45 (m, 2H), 7.28 – 7.25 (m, 4H), 7.22 – 7.12 (m, 1H), 6.47 (d,  $J = 4.2$  Hz, 1H), 6.20 (d,  $J = 4.2$  Hz, 1H), 2.85 (s, 3H), 2.68 (s, 3H);  $^{13}\text{C}$  NMR (126 MHz,  $\text{DMSO-}d_6$ )  $\delta$  156.86, 147.64, 144.65, 134.16, 128.94, 128.23, 128.04, 126.25, 126.20, 125.92, 125.82, 125.55, 125.25, 68.98, 22.70, 22.15; HRMS (ESI)  $m/z$  calculated for  $\text{C}_{18}\text{H}_{18}\text{NO}^+$   $[\text{M}+\text{H}]^+$  264.1388, found: 264.1376.

### NOESY Experiments for Product 3bi, 3bj, 3bk, 4a, 4b, 4c, and 4d

#### 1) NOESY spectra of product 3bi

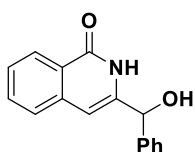

3bi

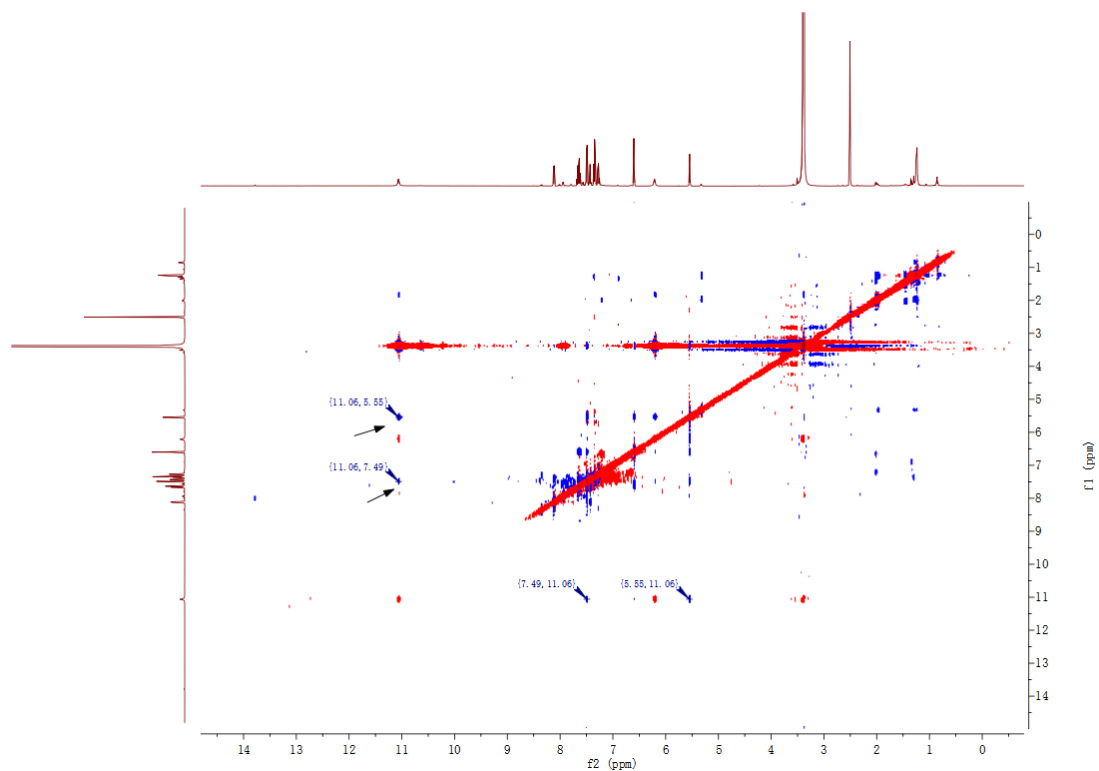



2) NOESY spectra of product **3bj**

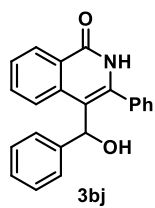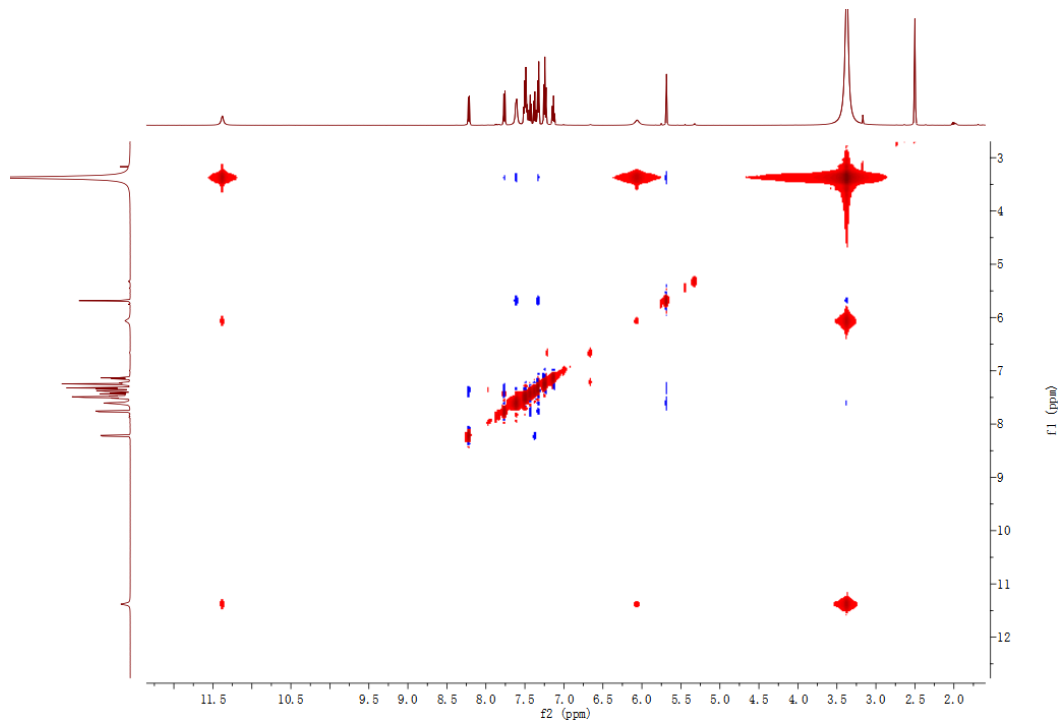

3) NOESY data of product **3bk**

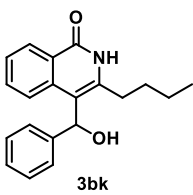

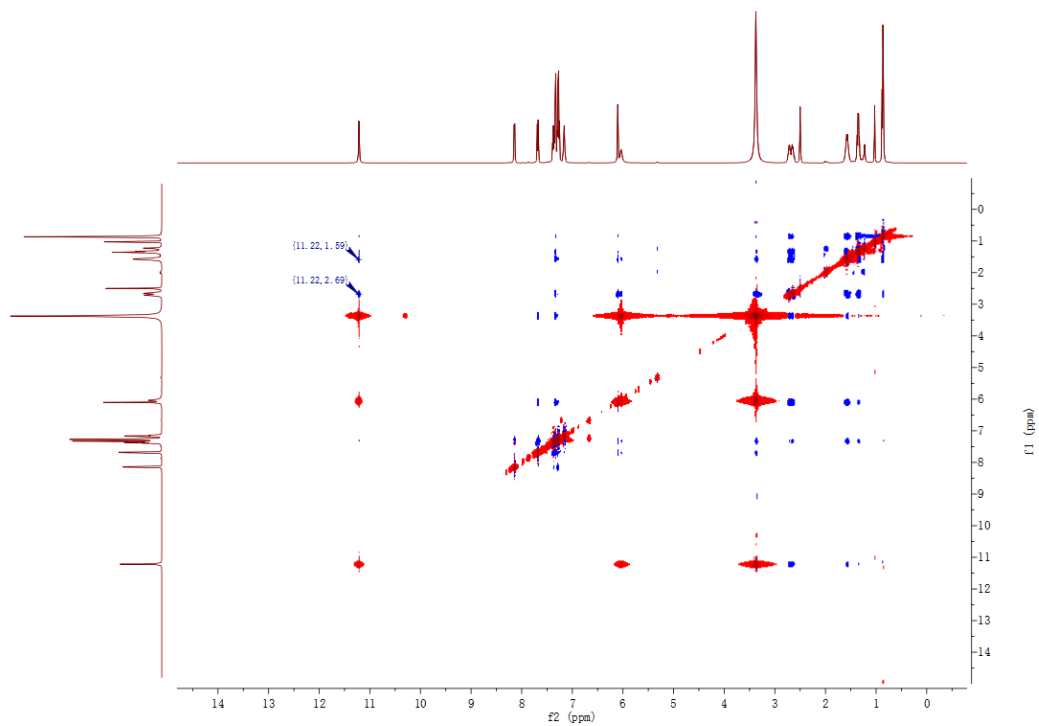

4) NOESY data of product **4a**

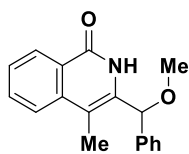

**4a**

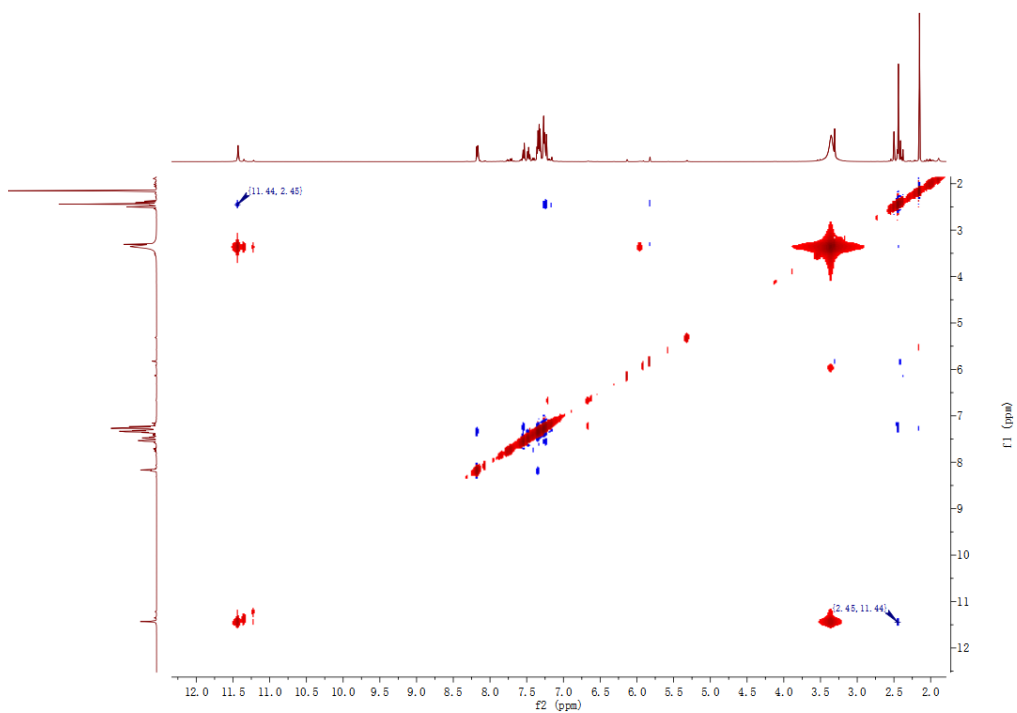

5) NOESY data of product **4b**

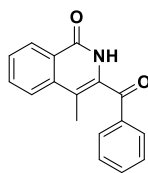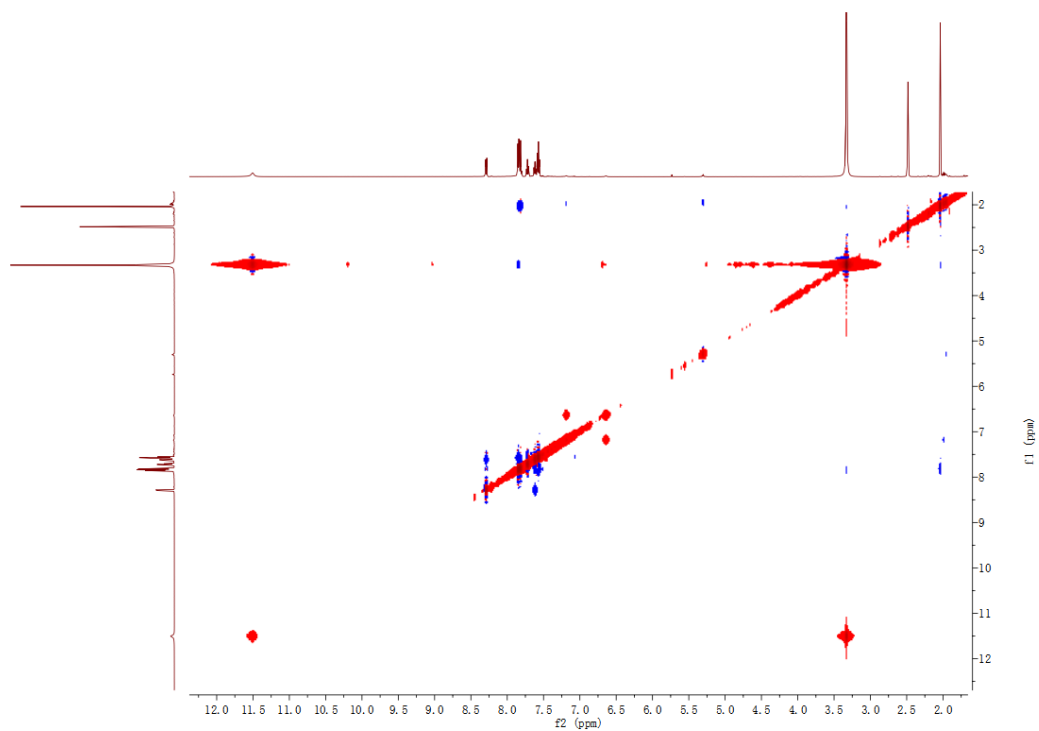

6) NOESY data of product **4c**

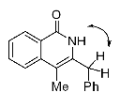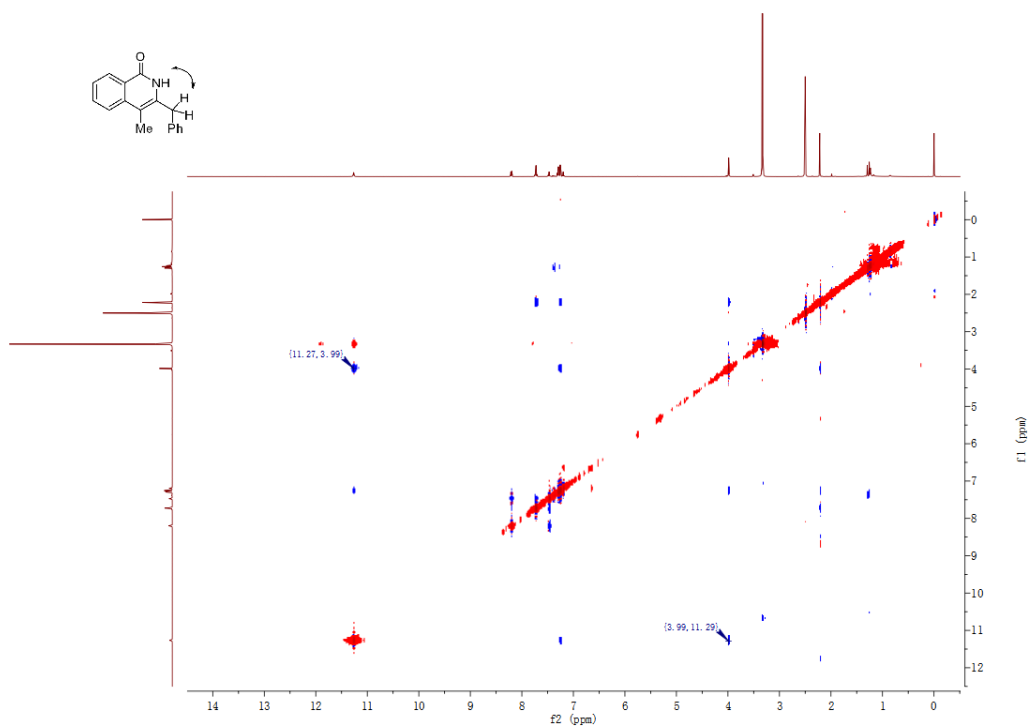

## 7) NOESY data of product **4d**

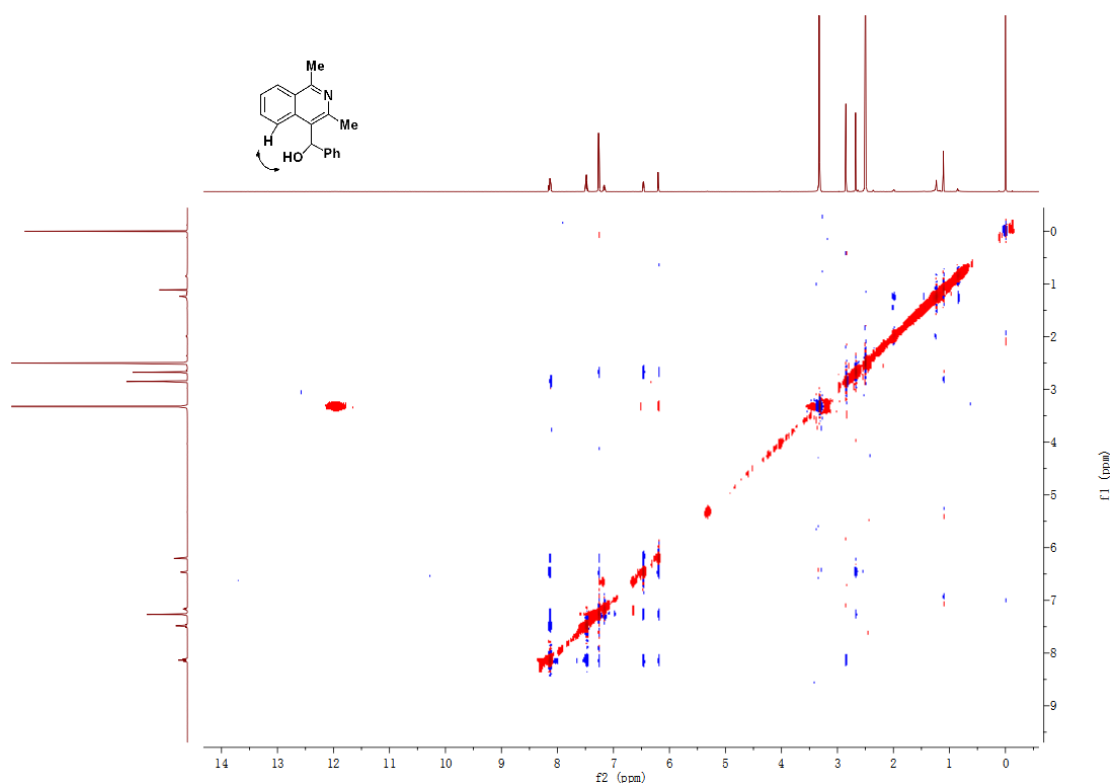

## Intermolecular Competition Experiment

The competition experiment between **1ab** and **1aj**

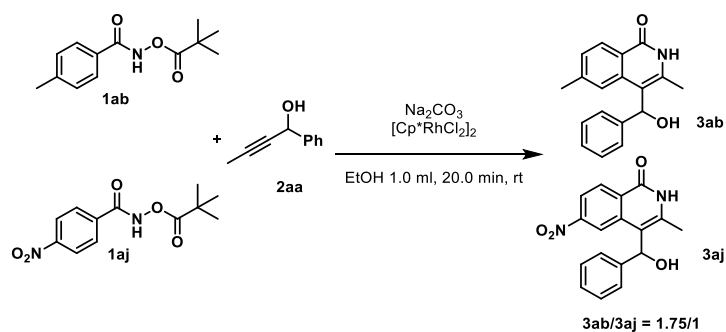

To a mixture of **1ab** (29.4 mg, 0.125 mmol, 1.0 eq.), **1aj** (33.3 mg, 0.125 mmol, 1.0 equiv), **2aa** (43.9 mg, 0.3 mmol, 1.2 eq.),  $[\text{Cp}^*\text{RhCl}_2]_2$  (7.7 mg, 0.0125 mmol, 5 mol%) and  $\text{Na}_2\text{CO}_3$  (26.5 mg, 0.25 mmol, 1.0 eq.) in a 10 mL reaction tube was added EtOH (1.0 mL). Then the resulting mixture was stirred at the temperature for 20.0 min. The solvent was removed in vacuum and  $^1\text{H}$  NMR was taken using 0.25 mmol 1,3,5-trimethoxybenzene as the internal standard.

The reaction of **1ab** (29.4 mg, 0.125 mmol, 1.0 eq.), **1aj** (33.3 mg, 0.125 mmol, 1.0 equiv) with **2aa** (43.9 mg, 0.3 mmol, 1.2 eq.) provided the product **3ab** in 21% NMR yield, **3aj** in 12% NMR yield. The ratio of **3ab/3aj** was 1.75 (0.21/0.12)

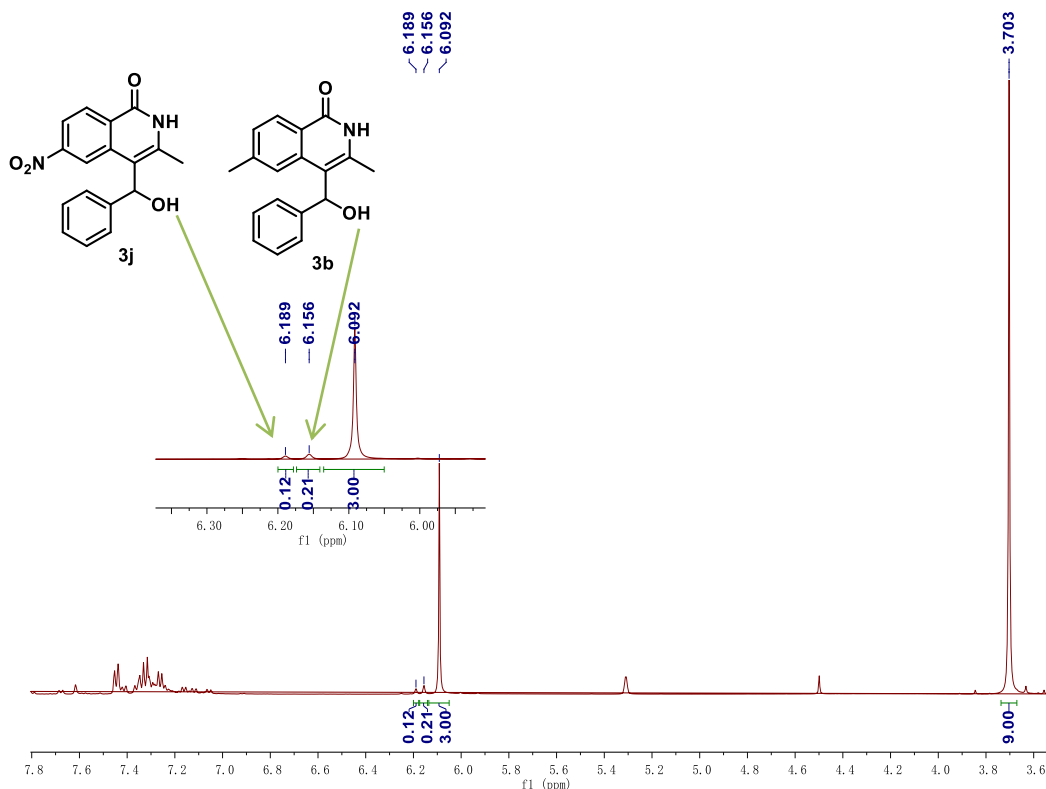

<sup>1</sup>H NMR of the products **3ab/3aj**.

### Gram-Scale Experiments

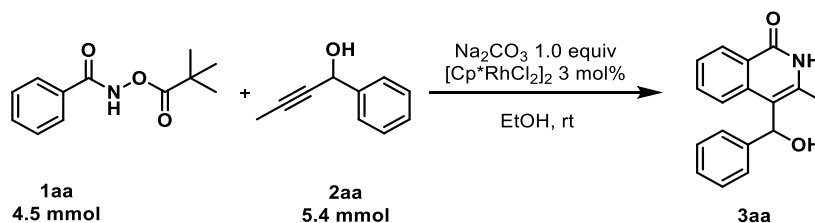

In a 100 mL reaction tube, the mixture of **1aa** (995.7 mg, 4.5 mmol, 1.0 eq.), **2aa** (789.4 mg, 6.0 mmol, 1.2 eq.),  $[\text{Cp}^*\text{RhCl}_2]_2$  (83.0 mg, 0.135 mmol, 3 mol%) and  $\text{Na}_2\text{CO}_3$  (477 mg, 4.5 mmol, 1.0 eq.) was added EtOH (8.0 mL). Then the resulting mixture was stirred at the temperature for 1.0 h. When the reaction was finished, the product precipitated out was simply collected by filtration, and the precipitation was washed with water. The product **3aa** was obtained as a white solid (1.10 g, 92% yield).

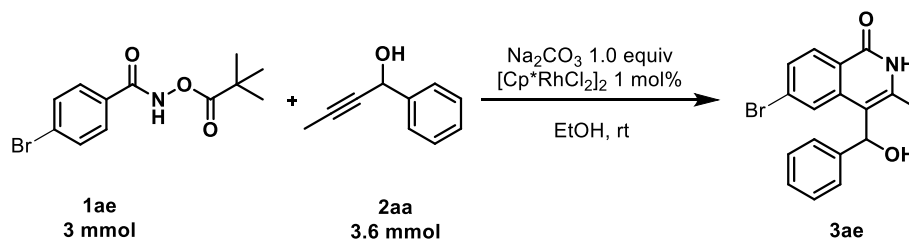

In a 100 mL reaction tube, the mixture of **1ae** (900.5 mg, 3 mmol, 1.0 eq.), **2aa** (526.3 mg, 3.6 mmol, 1.2 eq.),  $[\text{Cp}^*\text{RhCl}_2]_2$  (18.5 mg, 1 mol%) and  $\text{Na}_2\text{CO}_3$  (318.0 mg, 3 mmol, 1.0 eq.) was added EtOH (8.0 mL). Then the resulting mixture was stirred at the temperature for 2.0 h. When the reaction was finished, the product precipitated out was simply collected by filtration, and the precipitation was washed with water. The product **3ae** was obtained as a white solid (0.919 g, 89% yield).

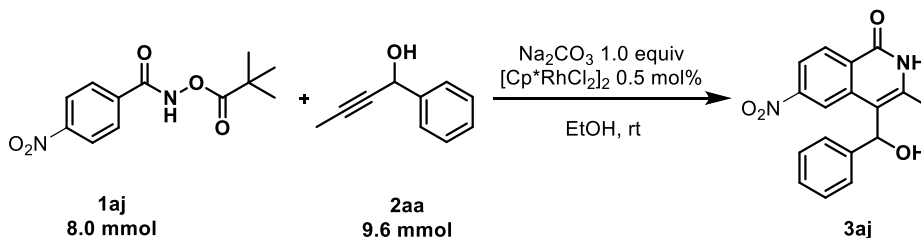

In a 100 mL reaction tube, the mixture of **1aj** (2130 mg, 8 mmol, 1.0 eq.), **2aa** (1403 mg, 9.6 mmol, 1.2 eq.),  $[\text{Cp}^*\text{RhCl}_2]_2$  (24.7 mg, 0.5 mol%) and  $\text{Na}_2\text{CO}_3$  (848.0 mg, 8 mmol, 1.0 eq.) was added EtOH (15.0 mL). Then the resulting mixture was stirred at the temperature for 3.5 h. When the reaction was finished, the product precipitated out was simply collected by filtration, and the precipitation was washed with water. The product **3aj** was obtained as a white solid (2.035 g, 82% yield).

## Control Experiments

### a) Procedure for the Synthesis of **4a**

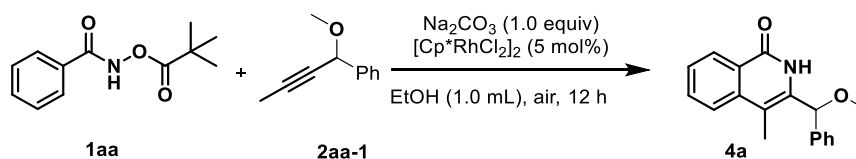

In a 10 mL reaction tube, the mixture of **1aa** (0.25 mmol), **2aa-1** (0.3 mmol),  $[\text{Cp}^*\text{RhCl}_2]_2$  (5.0 mol%) and  $\text{Na}_2\text{CO}_3$  (1.0 eq.) was added EtOH (1.0 mL). Then the resulting mixture was stirred for 12 h. When the reaction was finished, the solvent was removed under vacuum. The reaction mixture was subjected directly to flash chromatography on silica gel (petroleum ether/ethyl acetate) to provide the products **4a** in 43% yield.

### b) Procedure for the Synthesis of **4b**

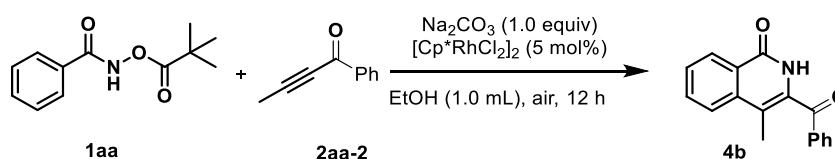

In a 10 mL reaction tube, the mixture of **1aa** (0.25 mmol), **2aa-2** (0.3 mmol),  $[\text{Cp}^*\text{RhCl}_2]_2$  (5.0 mol%) and  $\text{Na}_2\text{CO}_3$  (1.0 eq.) was added EtOH (1.0 mL). Then the resulting mixture was stirred for 12 h. When the reaction was finished, the solvent was removed under vacuum. The reaction mixture was subjected directly to flash chromatography on silica gel (petroleum ether/ethyl acetate) to provide the products **4b** (78% yield) and **4b'** (14% yield).

### c) Procedure for the Synthesis of **4c**

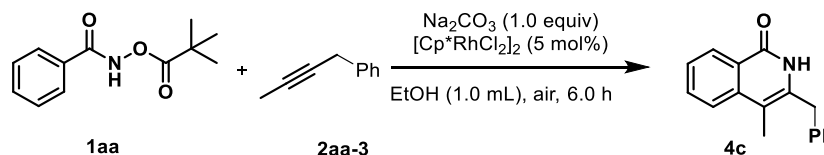

In a 10 mL reaction tube, the mixture of **1aa** (0.25 mmol), **2aa-1** (0.3 mmol),  $[\text{Cp}^*\text{RhCl}_2]_2$  (5.0 mol%) and  $\text{Na}_2\text{CO}_3$  (1.0 eq.) was added EtOH (1.0 mL). Then the resulting mixture was stirred for 6.0 h. When the reaction was finished, the solvent was removed under vacuum. The reaction

mixture was subjected directly to flash chromatography on silica gel (petroleum ether/ethyl acetate) to provide the products **4c** (27% yield) and **4c'** (45% yield).

d) Procedure for the Synthesis of **4d**

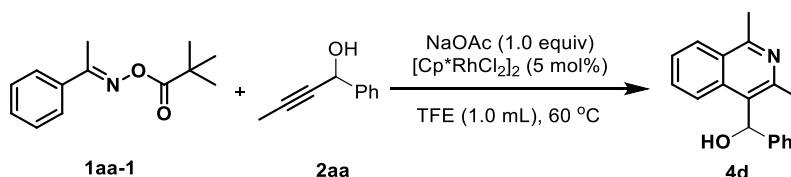

In a 10 mL reaction tube, the mixture of **1aa-1** (0.25 mmol), **2aa** (0.3 mmol),  $[\text{Cp}^*\text{RhCl}_2]_2$  (5.0 mol%) and  $\text{Na}_2\text{CO}_3$  (1.0 eq.) was added TFE (1.0 mL). Then the resulting mixture was stirred for 12 h at 60 °C. When the reaction was finished, the solvent was removed under vacuum. The reaction mixture was subjected directly to flash chromatography on silica gel (petroleum ether/ethyl acetate) to provide the products **4d** (72% yield).

## Mechanistic Experiments

### Deuterium Incorporation Experiment A

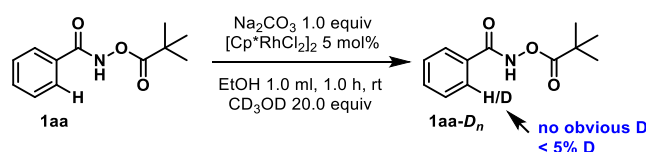

To a mixture of **1aa** (55.3 mg, 0.25 mmol, 1.0 eq.),  $[\text{Cp}^*\text{RhCl}_2]_2$  (7.7 mg, 0.0125 mmol, 5 mol%) and  $\text{Na}_2\text{CO}_3$  (26.5 mg, 0.25 mmol, 1.0 eq.) in a 10 mL reaction tube was added  $\text{CD}_3\text{OD}$  (180.4 mg, 5.0 mmol, 20.0 eq.). Then the resulting mixture was stirred at the temperature for 1.0 h. After removal of the solvents under vacuum, the residue obtained was directly used for  $^1\text{H}$ NMR analysis. The reaction of **1aa** (55.3 mg, 0.25 mmol, 1.0 equiv) without **2aa** provided the product **1aa-D<sub>n</sub>**. Found no obvious H/D exchange occurred at the C2-position of the **1aa** (< 5% D).



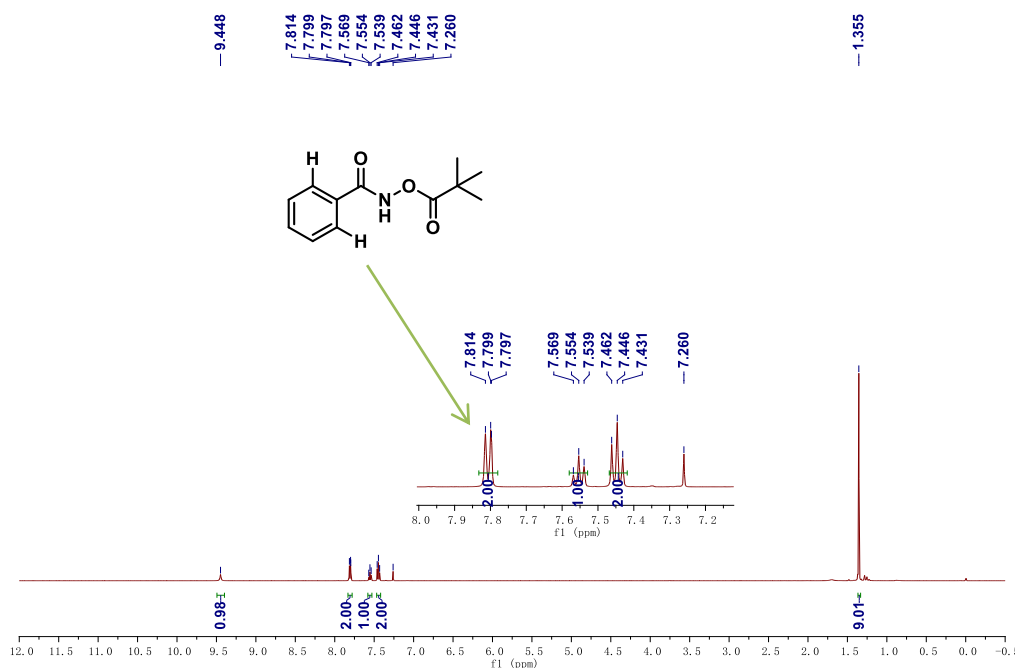

$^1\text{H}$  NMR of the product **1aa-D<sub>n</sub>** of this reaction.

#### Deuterium Incorporation Experiment B

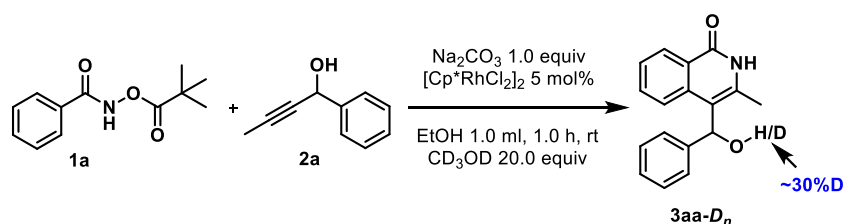

To a mixture of **1aa** (55.3 mg, 0.25 mmol, 1.0 eq.), **2aa** (43.9 mg, 0.3 mmol, 1.2 eq.),  $[\text{Cp}^*\text{RhCl}_2]_2$  (7.7 mg, 0.0125 mmol, 5 mol%) and  $\text{Na}_2\text{CO}_3$  (26.5 mg, 0.25 mmol, 1.0 eq.),  $\text{CD}_3\text{OD}$  (180.4 mg, 5.0 mmol, 20.0 eq.) in a 10 mL reaction tube was added EtOH (1.0 mL). Then the resulting mixture was stirred at the temperature for 1.0 h. After removal of the solvents under vacuum, the residue obtained was directly used for  $^1\text{H}$ NMR analysis.

The reaction of **1aa** (55.3 mg, 0.25 mmol, 1.0 equiv) with **2aa** (43.9 mg, 0.3 mmol, 1.2 eq.) provided the product **3aa-D**, found 30% deuterium incorporation at the hydrogen of hydroxyl group.

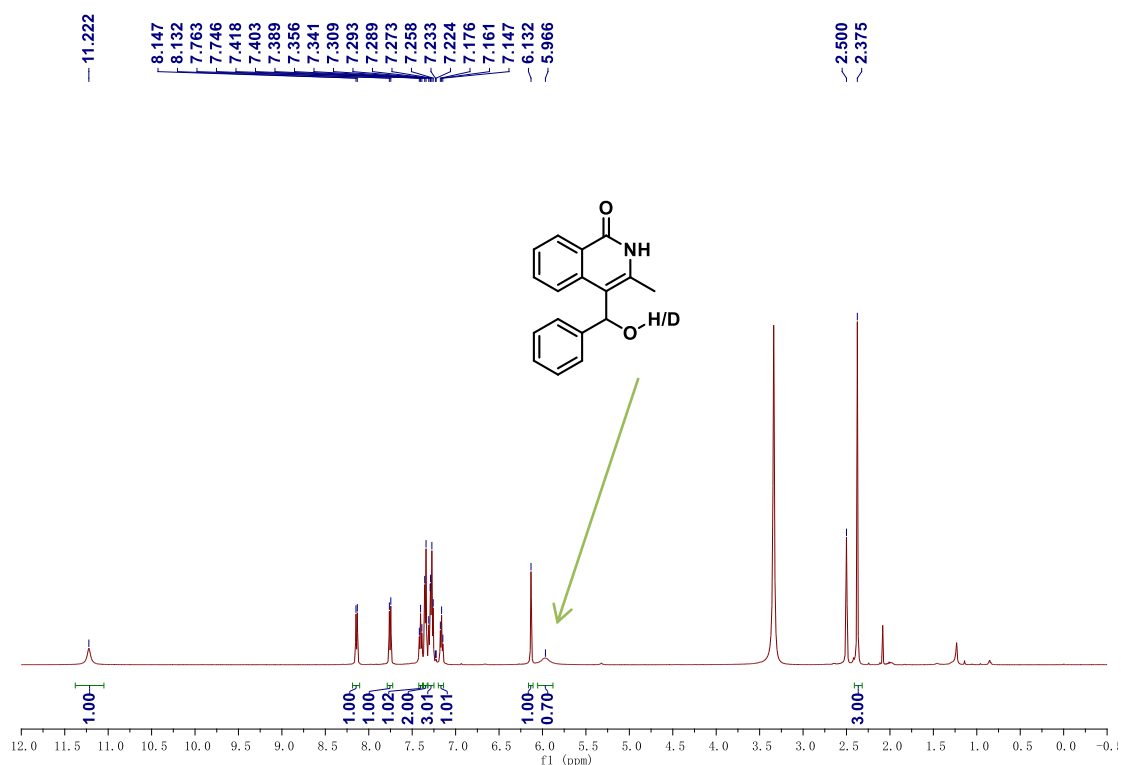

$^1\text{H}$  NMR of the product **3aa-D** of this reaction.

## Determination of the KIE

### (1) The intermolecular competition experiments

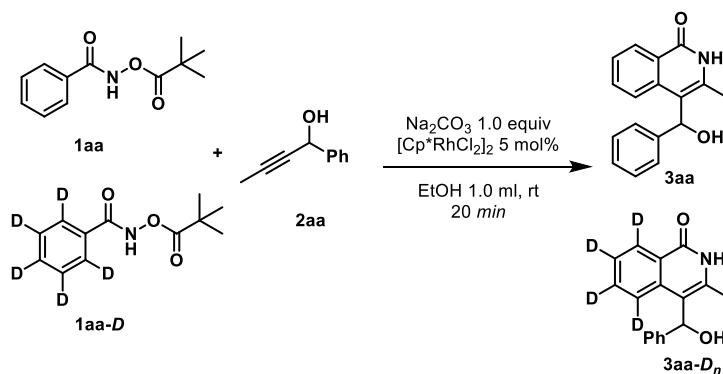

To a mixture of **1aa** (27.7 mg, 0.125 mmol, 1.0 eq.), **1aa-D** (28.3 mg, 0.125 mmol, 1.0 equiv.), **2aa** (43.9 mg, 0.3 mmol, 1.2 eq.),  $[\text{Cp}^*\text{RhCl}_2]_2$  (7.7 mg, 0.0125 mmol, 5 mol%) and  $\text{Na}_2\text{CO}_3$  (26.5 mg, 0.25 mmol, 1.0 eq.) in a 10 mL reaction tube was added EtOH (1.0 mL). Then the resulting mixture was stirred at the temperature for 20.0 min. The solvent was removed under vacuum and  $^1\text{H}$  NMR was taken by using 0.25 mmol 1,3,5-trimethoxybenzene as the internal standard.

The ratio of **3aa/3aa-D<sub>n</sub>** was 1.70  $[0.63/(1.0 - 0.63)]$  based on  $^1\text{H}$  NMR.

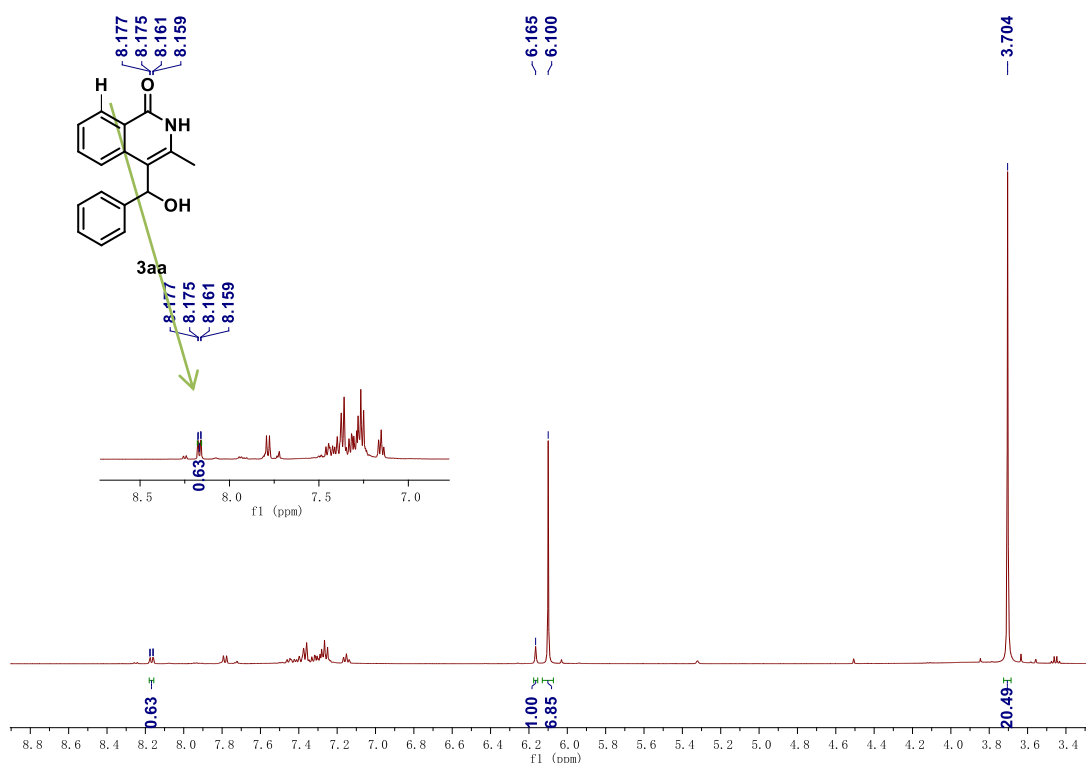

$^1\text{H}$  NMR of the products **3aa/3aa- $D_n$**  of this reaction.

(2) Two parallel reactions for KIE value measurement

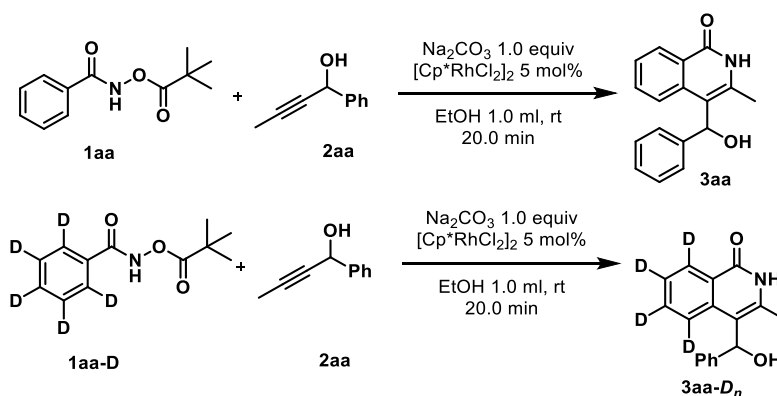

To a mixture of **1aa** (55.3 mg, 0.25 mmol, 1.0 eq.), **2aa** (43.9 mg, 0.3 mmol, 1.2 eq.),  $[\text{Cp}^*\text{RhCl}_2]_2$  (7.7 mg, 0.0125 mmol, 5 mol%) and  $\text{Na}_2\text{CO}_3$  (26.5 mg, 0.25 mmol, 1.0 eq.), in a 10 mL reaction tube was added  $\text{EtOH}$  (1.0 mL). Then the resulting mixture was stirred at the temperature for 20.0 min. The solvent was removed under vacuum and  $^1\text{H}$  NMR was taken using 0.25 mmol 1,3,5-trimethoxybenzene as the internal standard.

The reaction of **1aa** (55.3 mg, 0.25 mmol, 1.0 equiv) with **2aa** (43.9 mg, 0.3 mmol, 1.2 eq.) provided the product **3aa** in 62% NMR yield.

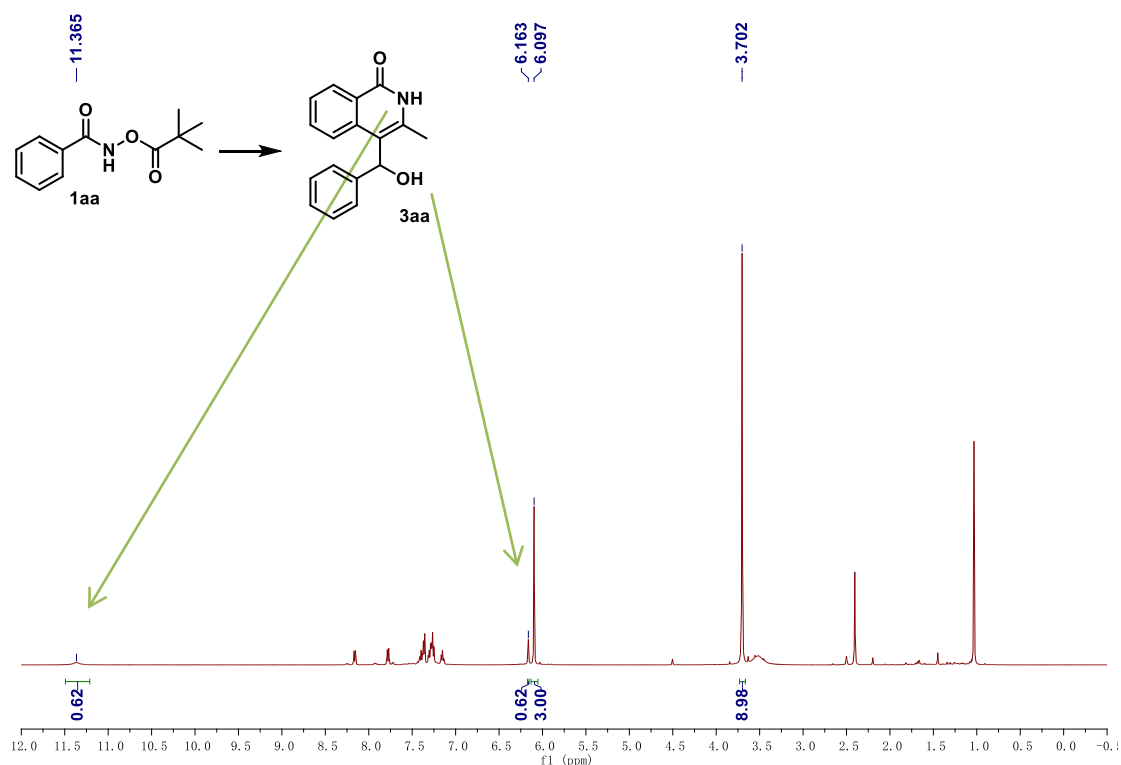

<sup>1</sup>H NMR of the crude product **3aa**.

To a mixture of **1aa-D** (56.6 mg, 0.25 mmol, 1.0 equiv), **2aa** (43.9 mg, 0.3 mmol, 1.2 eq.), [Cp\**Rh*Cl<sub>2</sub>]<sub>2</sub> (7.7 mg, 0.0125 mmol, 5 mol%) and Na<sub>2</sub>CO<sub>3</sub> (26.5 mg, 0.25 mmol, 1.0 eq.) in a 10 mL reaction tube was added EtOH (1.0 mL). Then the resulting mixture was stirred at the temperature for 20.0 min. The solvent was removed in vacuum and <sup>1</sup>H NMR was taken using 0.25 mmol 1,3,5-trimethoxybenzene as the internal standard.

The reaction of **1aa-D** (56.6 mg, 0.25 mmol, 1.0 equiv) with **2aa** (43.9 mg, 0.3 mmol, 1.2 eq.) provided the product **3aa-D<sub>n</sub>** in 38% yield. The ratio of **3aa/3aa-D<sub>n</sub>** was 1.63 (0.62/0.38)

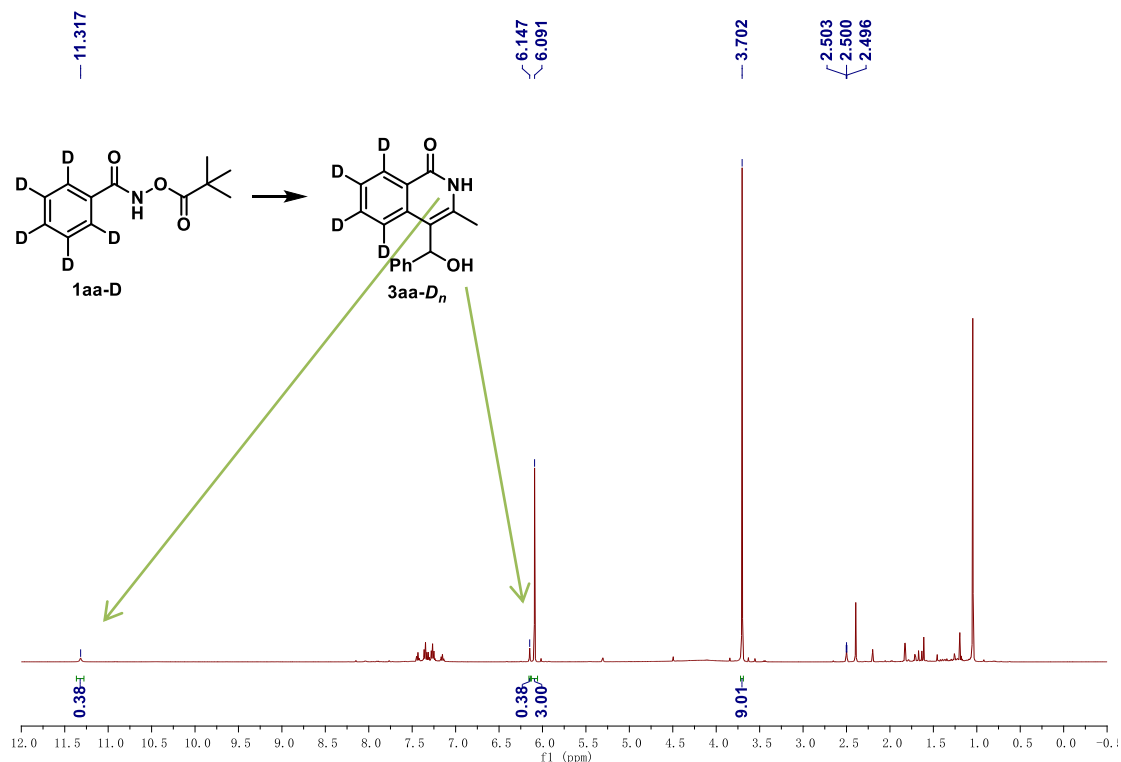

$^1\text{H}$  NMR of the crude product  $3\text{aa-}D_n$

### Catalyst Recycling Experiments

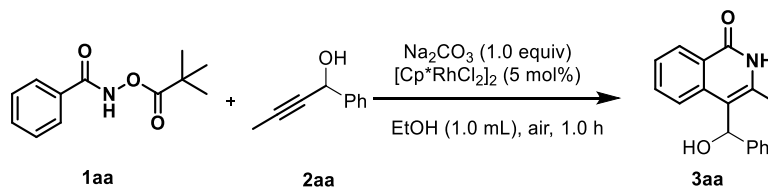

In a 10 mL reaction tube, the mixture of  $1\text{aa}$  (0.25 mmol),  $2\text{aa}$  (0.3 mmol),  $[\text{Cp}^*\text{RhCl}_2]_2$  (5.0 mol%) and  $\text{Na}_2\text{CO}_3$  (1.0 eq.) was added EtOH (1.0 mL). Then the resulting mixture was stirred for 1.0 h. When the reaction was finished, the desired product precipitated out as a solid, and the product  $3\text{aa}$  was simply collected by filtration. Due to  $\text{Na}_2\text{CO}_3$  are coarse white granules in EtOH, it can be separated from the product easily by using Pasteur pipet during filtration. The precipitation was washed with ethanol (1.0 mL) and dried under vacuum. The filtrate (concentrated to  $\sim 1$  mL) was reused in the next cycle without adding additional rhodium catalyst.  $1\text{aa}$  (0.25 mmol),  $2\text{aa}$  (0.3 mmol), and  $\text{Na}_2\text{CO}_3$  (1.0 eq.) were added to the filtrate in each cycle. Repeating the above-mentioned procedure for 10 times in three days, the overall results showed that no obvious decrease in catalytic activity was observed.

**X-ray data of compound 3aa (Deposition Data: CCDC 2156445)**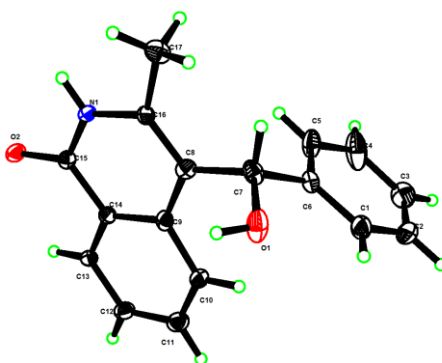**Table S1. Crystal data and structure refinement for compound 3aa.**

|                                             |                                                               |
|---------------------------------------------|---------------------------------------------------------------|
| Identification code                         | mo_2022197_0m                                                 |
| Empirical formula                           | C <sub>17</sub> H <sub>15</sub> NO <sub>2</sub>               |
| Formula weight                              | 265.30                                                        |
| Temperature/K                               | 150.0                                                         |
| Crystal system                              | monoclinic                                                    |
| Space group                                 | Pc                                                            |
| a/Å                                         | 6.9187(10)                                                    |
| b/Å                                         | 12.6378(19)                                                   |
| c/Å                                         | 14.994(2)                                                     |
| α/°                                         | 90                                                            |
| β/°                                         | 96.541(5)                                                     |
| γ/°                                         | 90                                                            |
| Volume/Å <sup>3</sup>                       | 1302.5(3)                                                     |
| Z                                           | 4                                                             |
| ρ <sub>calc</sub> /cm <sup>3</sup>          | 1.353                                                         |
| μ/mm <sup>-1</sup>                          | 0.089                                                         |
| F(000)                                      | 560.0                                                         |
| Crystal size/mm <sup>3</sup>                | 0.12 × 0.08 × 0.05                                            |
| Radiation                                   | Mo Kα (λ = 0.71073)                                           |
| 2θ range for data collection/°              | 4.226 to 52.848                                               |
| Index ranges                                | -8 ≤ h ≤ 8, -15 ≤ k ≤ 15, -18 ≤ l ≤ 18                        |
| Reflections collected                       | 11327                                                         |
| Independent reflections                     | 4770 [R <sub>int</sub> = 0.0896, R <sub>sigma</sub> = 0.1247] |
| Data/restraints/parameters                  | 4770/2/365                                                    |
| Goodness-of-fit on F <sup>2</sup>           | 1.008                                                         |
| Final R indexes [I ≥ 2σ (I)]                | R <sub>1</sub> = 0.0692, wR <sub>2</sub> = 0.1402             |
| Final R indexes [all data]                  | R <sub>1</sub> = 0.1481, wR <sub>2</sub> = 0.1807             |
| Largest diff. peak/hole / e Å <sup>-3</sup> | 0.39/-0.32                                                    |

**Table S2. Fractional Atomic Coordinates ( $\times 10^4$ ) and Equivalent Isotropic Displacement Parameters ( $\text{\AA}^2 \times 10^3$ ) for mo\_2022197\_0m.  $U_{\text{eq}}$  is defined as 1/3 of of the trace of the orthogonalised  $U_{\text{ij}}$  tensor.**

| Atom | <i>x</i>  | <i>y</i>  | <i>z</i> | $U_{\text{eq}}$ |
|------|-----------|-----------|----------|-----------------|
| O3   | -8256(7)  | -6753(4)  | -4125(4) | 26.6(12)        |
| O2   | -1599(7)  | -5714(4)  | -5871(4) | 30.3(13)        |
| C20  | -4466(15) | -6492(9)  | -3156(7) | 25(2)           |
| O4   | -2157(8)  | -3585(5)  | -5470(4) | 40.1(15)        |
| N1   | -2030(9)  | -7165(5)  | -5052(4) | 24.6(15)        |
| O1   | -7663(9)  | -8868(5)  | -4477(5) | 46.2(17)        |
| N2   | -7840(9)  | -5286(5)  | -4958(4) | 25.0(15)        |
| C12  | -7135(13) | -6150(8)  | -7278(7) | 31(2)           |
| C24  | -4144(11) | -4939(6)  | -4094(5) | 22.7(17)        |
| C26  | -6796(12) | -4429(7)  | -5214(6) | 25(2)           |
| C18  | -7199(11) | -5992(6)  | -4305(5) | 24.5(18)        |
| C31  | -4157(18) | -1499(9)  | -3082(8) | 38(3)           |
| C19  | -5286(11) | -5807(6)  | -3842(5) | 22.8(17)        |
| C25  | -4984(13) | -4230(7)  | -4802(6) | 25(2)           |
| C14  | -4594(10) | -6676(6)  | -6157(5) | 22.0(17)        |
| C10  | -7606(11) | -7627(6)  | -6320(5) | 27.9(19)        |
| C15  | -2654(10) | -6484(6)  | -5707(5) | 22.3(17)        |
| C7   | -6008(15) | -9171(7)  | -4900(7) | 32(2)           |
| C11  | -8315(13) | -6945(8)  | -7003(6) | 35(2)           |
| C6   | -6660(12) | -9941(7)  | -5661(6) | 29(2)           |
| C3   | -7740(18) | -11327(9) | -7067(8) | 47(3)           |
| C27  | -7839(11) | -3815(7)  | -5980(5) | 31(2)           |
| C16  | -3075(12) | -8030(7)  | -4777(6) | 24(2)           |
| C8   | -4883(12) | -8231(7)  | -5188(6) | 26(2)           |
| C30  | -4678(14) | -2208(7)  | -3777(6) | 40(2)           |
| C28  | -3858(15) | -3280(7)  | -5091(7) | 29(2)           |
| C29  | -3313(12) | -2501(7)  | -4335(6) | 29(2)           |
| C9   | -5680(11) | -7532(6)  | -5883(5) | 24.4(18)        |
| C1   | -8529(13) | -10346(7) | -5793(7) | 40(2)           |
| C23  | -2249(11) | -4831(7)  | -3670(5) | 28.2(19)        |
| C22  | -1543(12) | -5530(8)  | -3005(5) | 32(2)           |
| C17  | -2005(12) | -8640(7)  | -4019(6) | 36(2)           |
| C21  | -2683(15) | -6348(8)  | -2735(7) | 32(3)           |
| C33  | -1005(14) | -1335(7)  | -3502(7) | 44(2)           |
| C35  | -1466(13) | -2046(6)  | -4199(6) | 37(2)           |
| C5   | -5333(14) | -10267(7) | -6227(7) | 41(2)           |

|     |           |            |           |       |
|-----|-----------|------------|-----------|-------|
| C2  | -9060(13) | -11029(7)  | -6496(7)  | 44(2) |
| C32 | -2360(20) | -1068(9)   | -2933(8)  | 47(3) |
| C13 | -5248(14) | -6007(8)   | -6855(8)  | 25(2) |
| C4  | -5830(20) | -10951(10) | -6931(10) | 65(5) |

**Table S3. Anisotropic Displacement Parameters ( $\text{\AA}^2 \times 10^3$ ) for mo\_2022197\_0m. The Anisotropic displacement factor exponent takes the form:  $-2\pi^2[h^2a^2U_{11}+2hka*b*U_{12}+\dots]$ .**

| Atom | $U_{11}$ | $U_{22}$ | $U_{33}$ | $U_{23}$ | $U_{13}$ | $U_{12}$ |
|------|----------|----------|----------|----------|----------|----------|
| O3   | 20(3)    | 25(3)    | 35(3)    | 2(3)     | 5(2)     | -3(2)    |
| O2   | 21(3)    | 31(3)    | 38(3)    | 5(3)     | 1(2)     | -4(3)    |
| C20  | 28(5)    | 28(6)    | 22(5)    | 4(4)     | 10(4)    | 3(4)     |
| O4   | 39(4)    | 40(4)    | 45(4)    | -10(3)   | 19(3)    | -9(3)    |
| N1   | 18(3)    | 23(4)    | 31(4)    | 3(3)     | -3(3)    | -2(3)    |
| O1   | 50(4)    | 37(4)    | 59(4)    | -16(3)   | 35(3)    | -16(3)   |
| N2   | 17(3)    | 32(4)    | 27(4)    | 1(3)     | 3(3)     | -3(3)    |
| C12  | 25(5)    | 35(6)    | 31(6)    | 0(4)     | -2(4)    | 3(4)     |
| C24  | 21(4)    | 24(4)    | 23(4)    | -2(4)    | 6(3)     | 3(3)     |
| C26  | 22(5)    | 26(5)    | 29(5)    | 6(4)     | 12(4)    | 4(4)     |
| C18  | 24(4)    | 25(5)    | 26(4)    | -3(4)    | 8(4)     | 5(4)     |
| C31  | 54(7)    | 35(7)    | 27(6)    | -4(5)    | 12(5)    | -8(5)    |
| C19  | 25(4)    | 22(4)    | 22(4)    | -5(3)    | 3(3)     | -1(4)    |
| C25  | 32(5)    | 19(4)    | 26(5)    | -5(4)    | 10(4)    | -8(4)    |
| C14  | 21(4)    | 22(4)    | 22(4)    | -3(3)    | 4(3)     | 1(3)     |
| C10  | 22(4)    | 28(5)    | 35(5)    | -2(4)    | 5(4)     | -2(4)    |
| C15  | 20(4)    | 24(4)    | 24(4)    | -2(3)    | 8(3)     | -2(3)    |
| C7   | 40(6)    | 24(5)    | 33(6)    | -1(4)    | 14(6)    | 1(5)     |
| C11  | 27(5)    | 40(6)    | 38(5)    | -6(5)    | 5(4)     | 2(4)     |
| C6   | 34(5)    | 20(5)    | 34(5)    | 0(4)     | 4(4)     | -3(4)    |
| C3   | 59(8)    | 44(7)    | 35(7)    | -3(6)    | -12(6)   | -4(6)    |
| C27  | 24(4)    | 34(5)    | 36(5)    | 7(4)     | 2(4)     | 4(4)     |
| C16  | 22(5)    | 20(5)    | 30(5)    | 5(4)     | 4(4)     | -2(4)    |
| C8   | 24(5)    | 30(5)    | 24(5)    | -3(4)    | 7(4)     | 1(4)     |
| C30  | 49(6)    | 35(5)    | 38(5)    | -7(4)    | 17(5)    | -11(4)   |
| C28  | 36(6)    | 24(5)    | 30(5)    | 3(4)     | 14(5)    | -9(5)    |
| C29  | 35(5)    | 27(5)    | 27(5)    | 9(4)     | 5(4)     | -4(4)    |
| C9   | 27(4)    | 23(4)    | 25(4)    | -9(4)    | 6(3)     | -2(3)    |
| C1   | 34(5)    | 28(5)    | 59(6)    | -11(5)   | 13(5)    | -2(4)    |
| C23  | 24(4)    | 33(5)    | 27(5)    | -2(4)    | 1(4)     | 1(4)     |
| C22  | 22(5)    | 47(6)    | 25(5)    | -8(5)    | -6(4)    | -4(4)    |
| C17  | 38(5)    | 36(5)    | 35(5)    | 12(4)    | 10(4)    | 3(4)     |
| C21  | 38(6)    | 31(6)    | 28(5)    | -1(4)    | 2(5)     | 4(5)     |



|     |         |       |       |        |        |        |
|-----|---------|-------|-------|--------|--------|--------|
| C33 | 48(6)   | 22(5) | 57(7) | 4(5)   | -12(5) | -5(4)  |
| C35 | 41(5)   | 29(5) | 41(5) | 1(4)   | 1(4)   | 1(4)   |
| C5  | 46(6)   | 32(5) | 50(6) | -9(5)  | 24(5)  | -14(4) |
| C2  | 32(5)   | 36(6) | 60(7) | -10(5) | -9(5)  | -4(4)  |
| C32 | 77(9)   | 28(6) | 36(7) | -5(5)  | 3(6)   | 0(6)   |
| C13 | 18(5)   | 23(5) | 34(6) | -1(5)  | 4(4)   | 1(4)   |
| C4  | 104(12) | 41(7) | 58(9) | -23(7) | 45(9)  | -24(8) |

**Table S4. Bond Lengths for mo\_2022197\_0m.**

| Atom | Atom | Length/Å  | Atom | Atom | Length/Å  |
|------|------|-----------|------|------|-----------|
| O3   | C18  | 1.256(9)  | C14  | C9   | 1.405(10) |
| O2   | C15  | 1.258(9)  | C14  | C13  | 1.382(14) |
| C20  | C19  | 1.413(14) | C10  | C11  | 1.385(12) |
| C20  | C21  | 1.332(16) | C10  | C9   | 1.421(11) |
| O4   | C28  | 1.418(11) | C7   | C6   | 1.528(13) |
| N1   | C15  | 1.340(10) | C7   | C8   | 1.510(12) |
| N1   | C16  | 1.398(10) | C6   | C1   | 1.384(11) |
| O1   | C7   | 1.423(11) | C6   | C5   | 1.383(12) |
| N2   | C26  | 1.380(11) | C3   | C2   | 1.374(15) |
| N2   | C18  | 1.361(10) | C3   | C4   | 1.399(18) |
| C12  | C11  | 1.386(12) | C16  | C8   | 1.354(12) |
| C12  | C13  | 1.397(14) | C16  | C17  | 1.497(11) |
| C24  | C19  | 1.427(10) | C8   | C9   | 1.428(12) |
| C24  | C25  | 1.459(12) | C30  | C29  | 1.382(12) |
| C24  | C23  | 1.397(11) | C28  | C29  | 1.515(13) |
| C26  | C25  | 1.356(12) | C29  | C35  | 1.395(11) |
| C26  | C27  | 1.501(11) | C1   | C2   | 1.378(13) |
| C18  | C19  | 1.442(11) | C23  | C22  | 1.379(12) |
| C31  | C30  | 1.391(15) | C22  | C21  | 1.388(13) |
| C31  | C32  | 1.350(17) | C33  | C35  | 1.388(12) |
| C25  | C28  | 1.521(12) | C33  | C32  | 1.381(15) |
| C14  | C15  | 1.453(10) | C5   | C4   | 1.377(17) |

**Table S5. Bond Angles for mo\_2022197\_0m.**

| Atom | Atom | Atom | Angle/°   | Atom | Atom | Atom | Angle/°   |
|------|------|------|-----------|------|------|------|-----------|
| C21  | C20  | C19  | 122.3(10) | C1   | C6   | C7   | 122.3(8)  |
| C15  | N1   | C16  | 125.7(7)  | C5   | C6   | C7   | 119.2(8)  |
| C18  | N2   | C26  | 125.2(7)  | C5   | C6   | C1   | 118.5(8)  |
| C11  | C12  | C13  | 120.7(10) | C2   | C3   | C4   | 120.0(11) |
| C19  | C24  | C25  | 118.5(7)  | N1   | C16  | C17  | 113.5(7)  |

|     |     |     |           |     |     |     |           |
|-----|-----|-----|-----------|-----|-----|-----|-----------|
| C23 | C24 | C19 | 118.3(7)  | C8  | C16 | N1  | 119.7(8)  |
| C23 | C24 | C25 | 123.1(7)  | C8  | C16 | C17 | 126.9(8)  |
| N2  | C26 | C27 | 113.4(7)  | C16 | C8  | C7  | 119.8(9)  |
| C25 | C26 | N2  | 120.3(8)  | C16 | C8  | C9  | 118.4(8)  |
| C25 | C26 | C27 | 126.3(8)  | C9  | C8  | C7  | 121.8(9)  |
| O3  | C18 | N2  | 120.5(7)  | C29 | C30 | C31 | 119.3(10) |
| O3  | C18 | C19 | 123.1(7)  | O4  | C28 | C25 | 112.0(7)  |
| N2  | C18 | C19 | 116.5(7)  | O4  | C28 | C29 | 109.2(8)  |
| C32 | C31 | C30 | 122.6(11) | C29 | C28 | C25 | 113.1(7)  |
| C20 | C19 | C24 | 118.3(8)  | C30 | C29 | C28 | 119.8(8)  |
| C20 | C19 | C18 | 121.4(8)  | C30 | C29 | C35 | 118.6(8)  |
| C24 | C19 | C18 | 120.2(7)  | C35 | C29 | C28 | 121.6(8)  |
| C24 | C25 | C28 | 121.2(9)  | C14 | C9  | C10 | 115.7(7)  |
| C26 | C25 | C24 | 119.3(8)  | C14 | C9  | C8  | 121.0(7)  |
| C26 | C25 | C28 | 119.5(9)  | C10 | C9  | C8  | 123.2(8)  |
| C9  | C14 | C15 | 119.3(7)  | C2  | C1  | C6  | 120.3(9)  |
| C13 | C14 | C15 | 117.1(8)  | C22 | C23 | C24 | 120.2(8)  |
| C13 | C14 | C9  | 123.6(8)  | C23 | C22 | C21 | 121.4(8)  |
| C11 | C10 | C9  | 121.5(8)  | C20 | C21 | C22 | 119.4(10) |
| O2  | C15 | N1  | 119.7(7)  | C32 | C33 | C35 | 120.6(10) |
| O2  | C15 | C14 | 124.3(7)  | C33 | C35 | C29 | 120.4(9)  |
| N1  | C15 | C14 | 115.9(7)  | C4  | C5  | C6  | 122.2(10) |
| O1  | C7  | C6  | 108.7(8)  | C3  | C2  | C1  | 120.7(10) |
| O1  | C7  | C8  | 112.5(7)  | C31 | C32 | C33 | 118.5(11) |
| C8  | C7  | C6  | 113.9(7)  | C14 | C13 | C12 | 118.3(10) |
| C10 | C11 | C12 | 120.0(9)  | C5  | C4  | C3  | 118.3(12) |

**Table S6. Hydrogen Atom Coordinates ( $\text{\AA}\times 10^4$ ) and Isotropic Displacement Parameters ( $\text{\AA}^2\times 10^3$ ) for mo\_2022197\_0m.**

| Atom | x        | y        | z        | U(eq) |
|------|----------|----------|----------|-------|
| H20  | -5212.79 | -7074.58 | -2987.76 | 30    |
| H4   | -2331.21 | -4180.99 | -5713.69 | 60    |
| H1   | -859.95  | -7058.45 | -4769.18 | 29    |
| H1A  | -7455.7  | -8278.62 | -4225.5  | 69    |
| H2   | -9013.05 | -5383.2  | -5239.17 | 30    |
| H12  | -7615.11 | -5698.8  | -7759.91 | 37    |
| H31  | -5100.97 | -1309.25 | -2696.98 | 46    |
| H10  | -8425.43 | -8170.89 | -6139.34 | 33    |
| H7   | -5120.87 | -9569.65 | -4444.92 | 38    |
| H11  | -9609.82 | -7021.35 | -7282.27 | 42    |

|      |           |           |          |    |
|------|-----------|-----------|----------|----|
| H3   | -8126.51  | -11789.07 | -7554.86 | 57 |
| H27A | -9054.35  | -4177.2   | -6197.6  | 47 |
| H27B | -7012.37  | -3764.94  | -6467.27 | 47 |
| H27C | -8131.8   | -3102.61  | -5775    | 47 |
| H30  | -5959.99  | -2488.36  | -3867.4  | 48 |
| H28  | -4720.59  | -2899.64  | -5566.8  | 35 |
| H1B  | -9450.86  | -10153.17 | -5398.64 | 48 |
| H23  | -1444.1   | -4273.97  | -3839.74 | 34 |
| H22  | -248.21   | -5450.3   | -2725.6  | 39 |
| H17A | -1173.95  | -9171.83  | -4260.35 | 54 |
| H17B | -2942.29  | -8992.48  | -3675.7  | 54 |
| H17C | -1198.42  | -8154.95  | -3625.68 | 54 |
| H21  | -2196.7   | -6800.83  | -2255.96 | 39 |
| H33  | 256.23    | -1028.41  | -3414.99 | 53 |
| H35  | -518.21   | -2223.16  | -4585.11 | 45 |
| H5   | -4036.35  | -10009.36 | -6127.84 | 49 |
| H2A  | -10350.59 | -11296.46 | -6585.51 | 53 |
| H32  | -2042.26  | -593.42   | -2447.09 | 57 |
| H13  | -4436.17  | -5463.41  | -7042.91 | 30 |
| H4A  | -4893.85  | -11162.96 | -7313.36 | 78 |

### Crystal structure determination of compound 3aa

Crystal data for C<sub>17</sub>H<sub>15</sub>NO<sub>2</sub> (M = 265.30 g/mol): monoclinic, space group Pc (no. 7), a = 6.9187(10) Å, b = 12.6378(19) Å, c = 14.994(2) Å, β = 96.541(5)°, V = 1302.5(3) Å<sup>3</sup>, Z = 4, T = 150.0 K, μ (MoKα) = 0.089 mm<sup>-1</sup>, D<sub>calc</sub> = 1.353 g/cm<sup>3</sup>, 11327 reflections measured (4.226° ≤ 2θ ≤ 52.848°), 4770 unique (R<sub>int</sub> = 0.0896, R<sub>sigma</sub> = 0.1247) which were used in all calculations. The final R<sub>1</sub> was 0.0692 (I > 2σ(I)) and wR<sub>2</sub> was 0.1807 (all data).

## DFT Calculations

### Computational details:

Density functional theory (DFT)<sup>13</sup> calculations were performed by using Gaussian 09 quantum chemical package.<sup>14</sup> Unless otherwise specified, geometry optimizations were performed using B3LYP<sup>15</sup> functional with Grimme D3 correction<sup>16</sup> Herein, the Stuttgart/Dresden effective core potential (SDD)<sup>17</sup> for Rh in conjunction with a standard 6-31G(d,p) basis set<sup>18</sup> for all other atoms. This level of theory is denoted as B3LYP-D3(BJ)/6-31G(d,p) SDD. Frequency analysis was conducted at the same level of theory to verify the stationary points to be real minima or saddle points and to obtain the thermodynamic energy corrections. Intrinsic reaction coordinate (IRC) calculations<sup>19</sup> were carried out to confirm that all transition state structures connect the corresponding reactants and products. Solvent effects in dichloromethane were estimated by using the SMD<sup>20</sup> solvation method at the M06<sup>21</sup> level of theory with Grimme D3 correction. Herein, SDD was used for Rh and the 6-311++G(d,p) basis set was used for all other atoms (BS2). This level of theory is denoted as M06-D3 SMD/6-311++G(d,p) SDD. If not noted, the energies presented in this paper are the M06-D3 SMD -calculated single point energies with B3LYP-D3(BJ)-calculated thermodynamic corrections which were calculated under standard conditions (1 atm and 298.15 K) (denoted as  $\Delta G_{\text{sol}}$  (M06-D3 SMD/6-311++G(d,p) SDD//B3LYP-D3(BJ)/6-31G(d,p) SDD) or  $\Delta G$  for clarity). The 3D diagrams of optimized structures are illustrated using CYLView.<sup>22</sup> Multiwfn was utilized to analyze interactions with the independent gradient model based on Hirshfeld partition of molecular density (IGMH) and the graphics are displayed using VMD program.

**Table S7.** Gibbs free energy differences between **TS-a** and **TS-b** at several levels of theory.

| Computational level                                       | $\Delta G(\text{TS-b})-\Delta G(\text{TS-a})$<br>(kcal/mol) |
|-----------------------------------------------------------|-------------------------------------------------------------|
| B3LYP-D3(BJ)/6-31G(d,p) SDD (gas)                         | -5.03                                                       |
| M06-D3 SMD/6-311++G(d,p) SDD//B3LYP-D3(BJ)/6-31G(d,p) SDD | 0.57                                                        |
| M06-D3 SMD/def2-TZVPP//B3LYP-D3(BJ)/6-31G(d,p) SDD        | 0.94                                                        |
| M06-D3 SMD/def2-QZVP//B3LYP-D3(BJ)/6-31G(d,p) SDD         | 0.82                                                        |
| M062x-D3 SMD/def2-TZVPP//B3LYP-D3(BJ)/6-31G(d,p) SDD      | 1.08                                                        |
| M06-D3 SMD/6-31G(d,p) SDD*                                | -0.69                                                       |
| M06-D3 SMD/6-311++G(d,p) SDD//M06-D3 SMD/6-31G(d,p) SDD*  | 0.36                                                        |

\* Geometry optimizations were done with SMD solvation model (**TS-a<sub>SMD</sub>** and **TS-b<sub>SMD</sub>**).

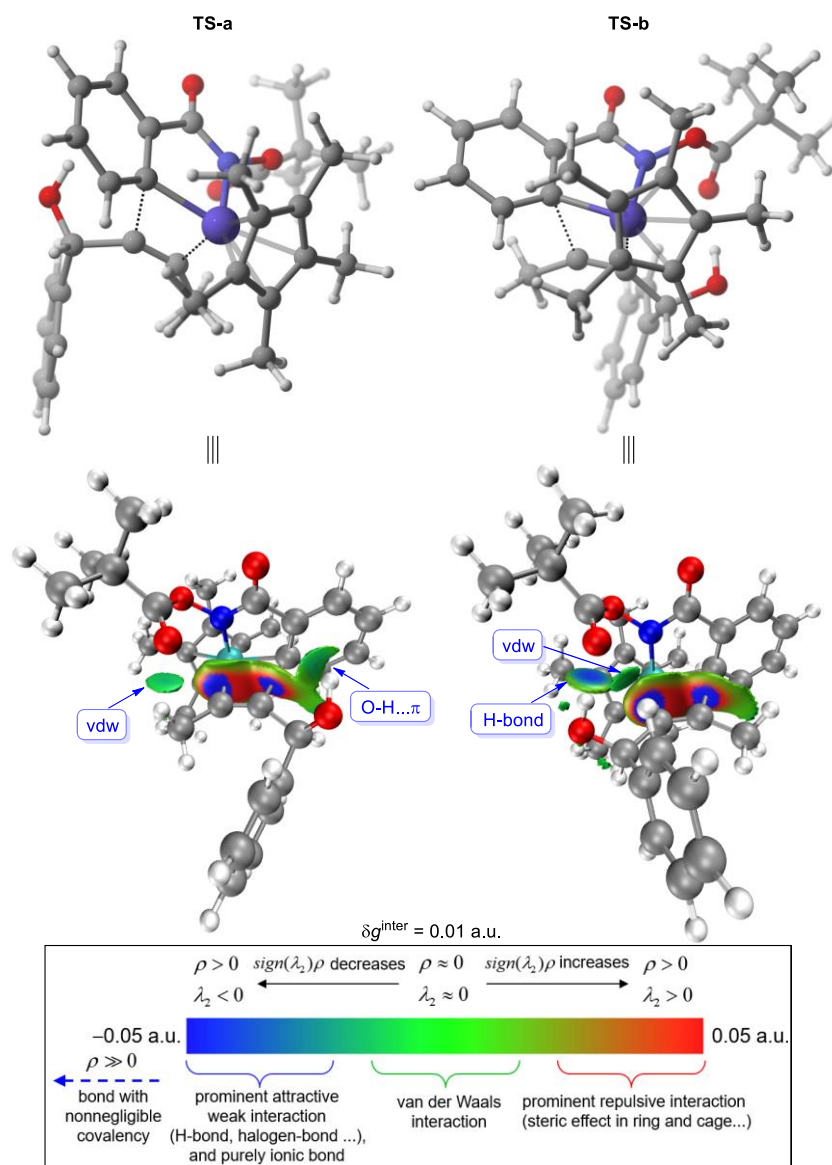

**Figure S1.** Interaction analysis using IGMH method (below shows IGMH colorbar).

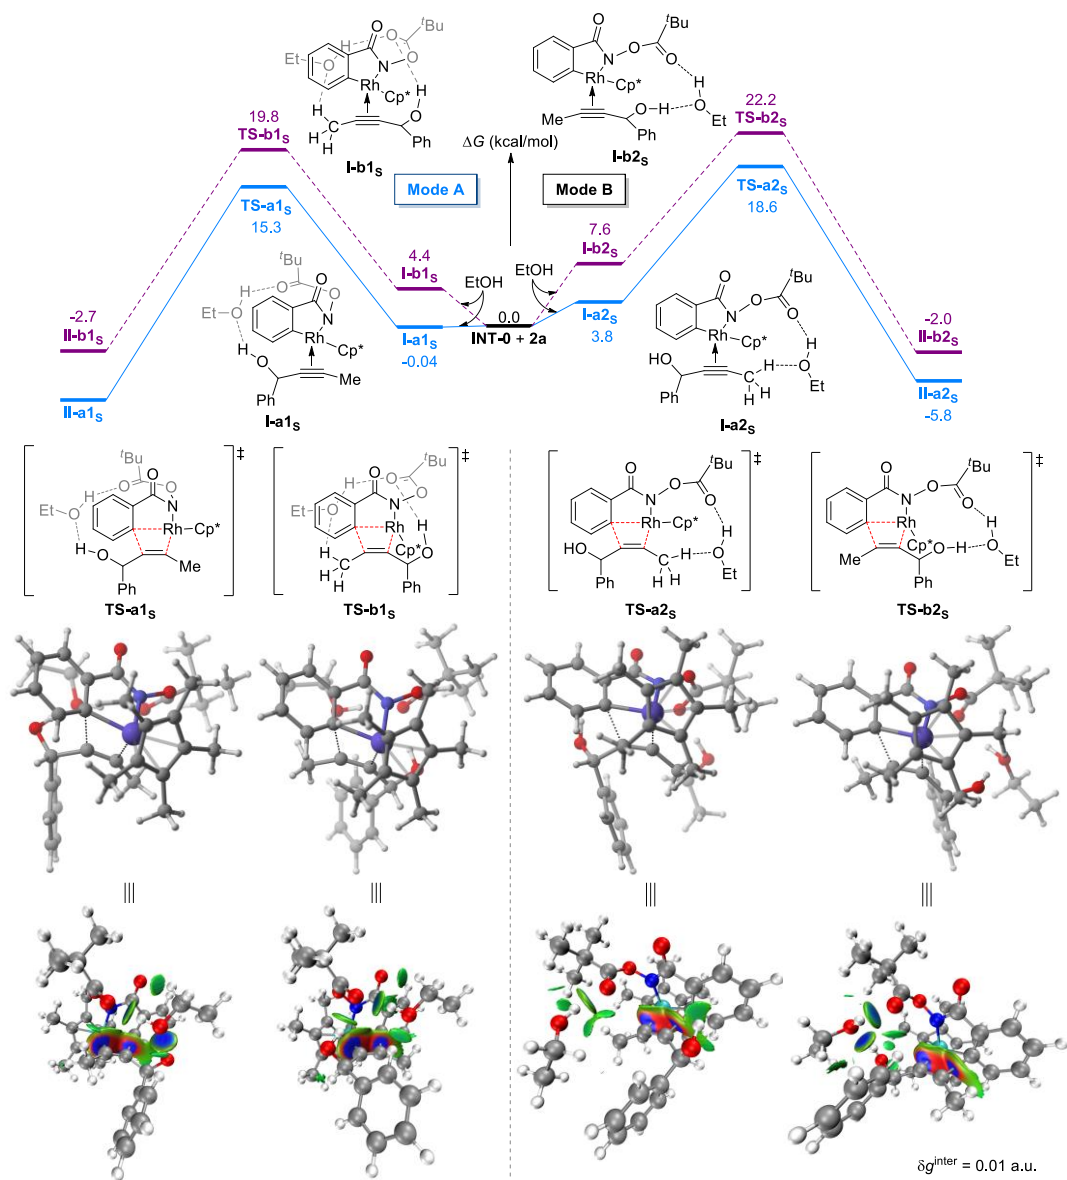

**Figure S2.** Computed Gibbs free energies for regioselective alkyne insertion involving one molecule of ethanol and interaction analysis of the four transition states using IGMH method.

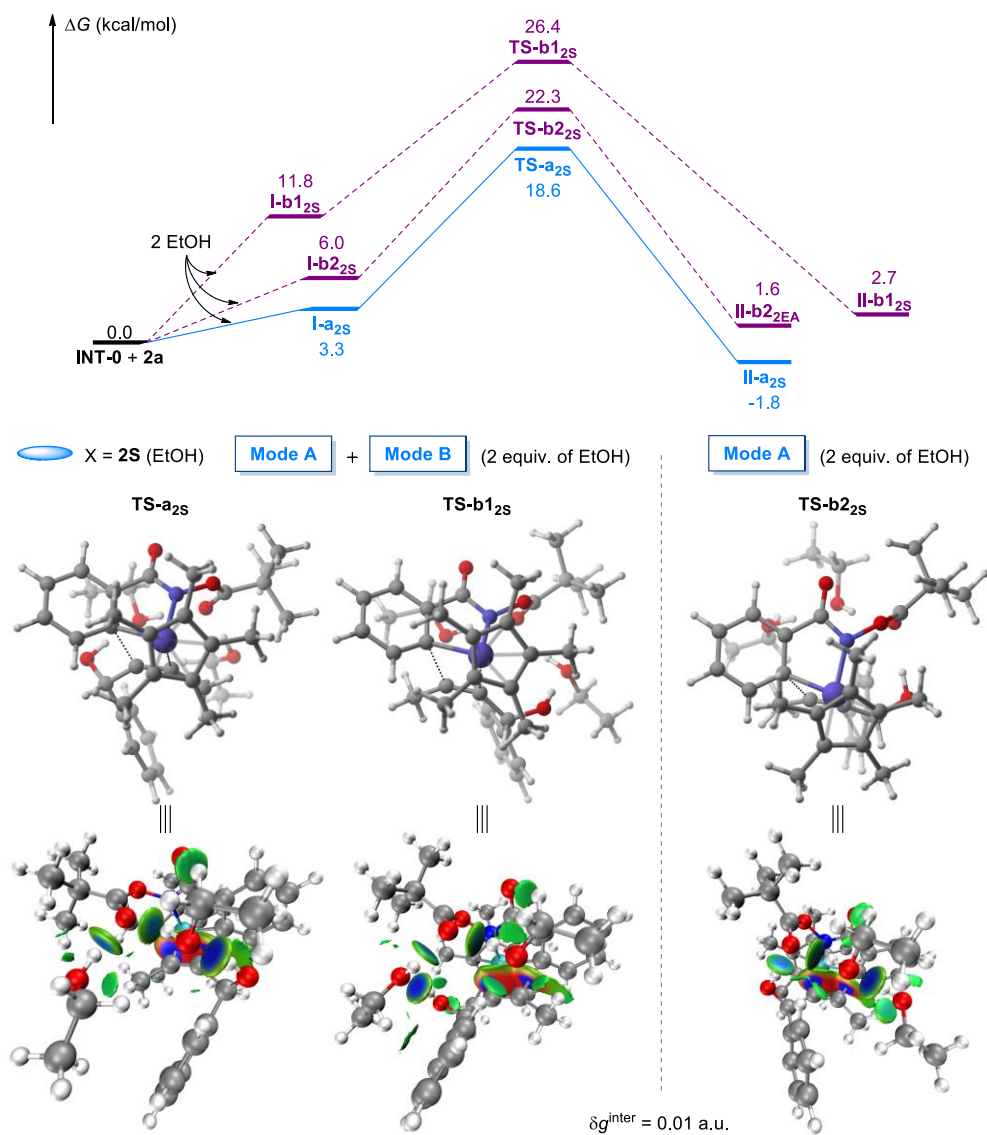

**Figure S3.** Computed Gibbs free energies for regioselective alkyne insertion involving two molecules of ethanol and interaction analysis of the three transition states using IGMH method.

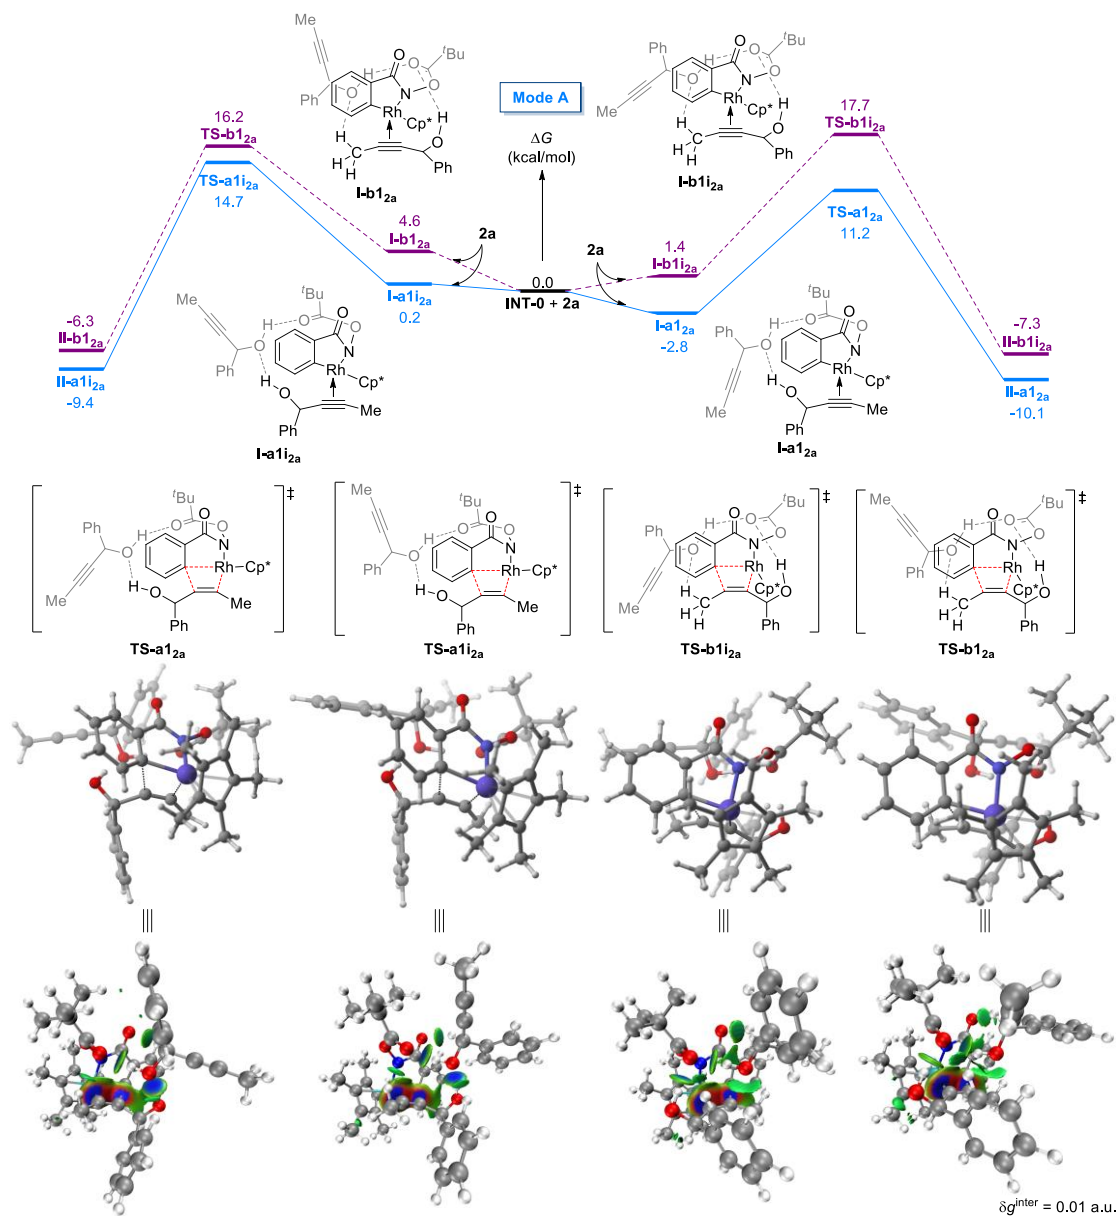

**Figure S4.** Computed Gibbs free energies for regioselective alkyne insertion involving another molecule of substrate **2a** and interaction analysis of the four transition states using IGMH method.

### Various energy values for the reported species and imaginary frequencies for the transition states

**Table S8.** Energy, enthalpy and free energy corrections of the structures calculated at B3LYP-D3(BJ)/6-31G(d,p) SDD, single point energies at the M06-D3 SMD/6-311++G(d,p) SDD//B3LYP-D3(BJ)/6-31G(d,p) SDD level (in Hartree) and imaginary frequencies of the transition states.



| Structures                  | corr. to<br>ZPE | corr. to <i>E</i> | corr. to <i>H</i> | corr. to <i>G</i> | SP <sub>SMD</sub> | Imaginary<br>frequency |
|-----------------------------|-----------------|-------------------|-------------------|-------------------|-------------------|------------------------|
| <b>2a</b> ( <i>R</i> -type) | 0.170816        | 0.181758          | 0.182702          | 0.130782          | -462.036668       | —                      |
| <b>INT-0</b>                | 0.455282        | 0.484919          | 0.485864          | 0.395527          | -1245.745977      | —                      |
| EtOH                        | 0.080201        | 0.084484          | 0.085428          | 0.054820          | -154.994401       | —                      |
| <b>I-a</b>                  | 0.628772        | 0.669945          | 0.670889          | 0.555135          | -1707.811359      | —                      |
| <b>TS-a</b>                 | 0.627809        | 0.668287          | 0.669231          | 0.555103          | -1707.788088      | -290.31                |
| <b>II-a</b>                 | 0.630583        | 0.670928          | 0.671873          | 0.557532          | -1707.832535      | —                      |
| <b>I-b</b>                  | 0.629918        | 0.670474          | 0.671418          | 0.557448          | -1707.806073      | —                      |
| <b>TS-b</b>                 | 0.629268        | 0.669293          | 0.670237          | 0.557199          | -1707.789281      | -282.29                |
| <b>II-b</b>                 | 0.632192        | 0.671892          | 0.672837          | 0.561562          | -1707.828576      | —                      |
| <b>I-a<sub>1s</sub></b>     | 0.712736        | 0.758715          | 0.759660          | 0.633473          | -1862.829452      | —                      |
| <b>TS-a<sub>1s</sub></b>    | 0.712017        | 0.757229          | 0.758173          | 0.634290          | -1862.805762      | -277.75                |
| <b>II-a<sub>1s</sub></b>    | 0.713443        | 0.759205          | 0.760149          | 0.633326          | -1862.842257      | —                      |
| <b>I-b<sub>1s</sub></b>     | 0.712466        | 0.758760          | 0.759705          | 0.632635          | -1862.821587      | —                      |
| <b>TS-b<sub>1s</sub></b>    | 0.711904        | 0.757364          | 0.758308          | 0.633362          | -1862.797661      | -304.44                |
| <b>II-b<sub>1s</sub></b>    | 0.714484        | 0.759872          | 0.760816          | 0.636686          | -1862.836927      | —                      |
| <b>I-a<sub>2s</sub></b>     | 0.711585        | 0.758134          | 0.759078          | 0.631408          | -1862.821344      | —                      |
| <b>TS-a<sub>2s</sub></b>    | 0.710472        | 0.756533          | 0.757477          | 0.630485          | -1862.796824      | -281.75                |
| <b>II-a<sub>2s</sub></b>    | 0.713513        | 0.759275          | 0.760219          | 0.634697          | -1862.839780      | —                      |
| <b>I-b<sub>2s</sub></b>     | 0.712669        | 0.758521          | 0.759465          | 0.634080          | -1862.817934      | —                      |
| <b>TS-b<sub>2s</sub></b>    | 0.712578        | 0.757545          | 0.758489          | 0.635801          | -1862.796393      | -284.60                |
| <b>II-b<sub>2s</sub></b>    | 0.714751        | 0.759975          | 0.760919          | 0.637372          | -1862.836459      | —                      |
| <b>I-a<sub>2s</sub></b>     | 0.795332        | 0.846927          | 0.847871          | 0.709004          | -2017.839291      | —                      |
| <b>TS-a<sub>2s</sub></b>    | 0.795198        | 0.845666          | 0.846610          | 0.710849          | -2017.816677      | -302.74                |
| <b>II-a<sub>2s</sub></b>    | 0.796709        | 0.847574          | 0.848518          | 0.710900          | -2017.849252      | —                      |
| <b>I-b<sub>12s</sub></b>    | 0.796391        | 0.847401          | 0.848345          | 0.713042          | -2017.829726      | —                      |
| <b>TS-b<sub>12s</sub></b>   | 0.795493        | 0.845856          | 0.846800          | 0.712395          | -2017.805813      | -297.03                |
| <b>II-b<sub>12s</sub></b>   | 0.797836        | 0.848317          | 0.849261          | 0.714523          | -2017.845728      | —                      |
| <b>I-b<sub>22s</sub></b>    | 0.795174        | 0.846880          | 0.847824          | 0.707284          | -2017.833160      | —                      |
| <b>TS-b<sub>22s</sub></b>   | 0.795166        | 0.845834          | 0.846778          | 0.709559          | -2017.809567      | -285.86                |
| <b>II-b<sub>22s</sub></b>   | 0.797465        | 0.848223          | 0.849167          | 0.712289          | -2017.845205      | —                      |
| <b>I-a<sub>12a</sub></b>    | 0.802493        | 0.855706          | 0.856650          | 0.711907          | -2169.878610      | —                      |
| <b>TS-a<sub>12a</sub></b>   | 0.801796        | 0.854177          | 0.855121          | 0.712957          | -2169.857408      | -273.28                |
| <b>II-a<sub>12a</sub></b>   | 0.804470        | 0.856891          | 0.857835          | 0.715605          | -2169.893850      | —                      |
| <b>I-a<sub>1i2a</sub></b>   | 0.802705        | 0.855755          | 0.856700          | 0.712635          | -2169.874613      | —                      |
| <b>TS-a<sub>1i2a</sub></b>  | 0.802617        | 0.854614          | 0.855558          | 0.715015          | -2169.853807      | -263.85                |
| <b>II-a<sub>1i2a</sub></b>  | 0.804944        | 0.857090          | 0.858034          | 0.717323          | -2169.894587      | —                      |
| <b>I-b<sub>12a</sub></b>    | 0.803946        | 0.856580          | 0.857524          | 0.715392          | -2169.870360      | —                      |
| <b>TS-b<sub>12a</sub></b>   | 0.802897        | 0.854934          | 0.855879          | 0.715468          | -2169.851816      | -279.85                |
| <b>II-b<sub>12a</sub></b>   | 0.804720        | 0.857049          | 0.857994          | 0.717669          | -2169.889877      | —                      |
| <b>I-b<sub>1i2a</sub></b>   | 0.803038        | 0.856102          | 0.857046          | 0.712958          | -2169.872913      | —                      |
| <b>TS-b<sub>1i2a</sub></b>  | 0.802823        | 0.854808          | 0.855753          | 0.715207          | -2169.849264      | -298.96                |
| <b>II-b<sub>1i2a</sub></b>  | 0.804667        | 0.857213          | 0.858157          | 0.714784          | -2169.888623      | —                      |

**Table S9.** Energy, enthalpy and free energy corrections of the structures calculated at M06-D3 SMD/6-31G(d,p) SDD, single point energies at the M06-D3 SMD/6-311++G(d,p) SDD//B3LYP-D3(BJ)/6-31G(d,p) SDD level (in Hartree) and imaginary frequencies of the transition states.

| Structures          | corr. to ZPE | corr. to $E$ | corr. to $H$ | corr. to $G$ | SP <sub>SMD</sub> | Imaginary frequency |
|---------------------|--------------|--------------|--------------|--------------|-------------------|---------------------|
| TS-a <sub>SMD</sub> | 0.626505     | 0.664995     | 0.665939     | 0.558767     | -1707.797976      | -260.42             |
| TS-b <sub>SMD</sub> | 0.626826     | 0.665364     | 0.666308     | 0.559692     | -1707.798330      | -275.22             |

### Cartesian coordinates of the optimized structures

#### 2a (*R*-type)

|   |             |             |             |
|---|-------------|-------------|-------------|
| C | -2.77382800 | -0.58976000 | -0.01820000 |
| C | -1.86587900 | 0.17508400  | -0.24274500 |
| C | -0.74102300 | 1.06499300  | -0.54115600 |
| O | -0.90303000 | 2.25704200  | 0.23148800  |
| H | -0.10052900 | 2.78058800  | 0.09809000  |
| C | -3.87029800 | -1.50812400 | 0.26618100  |
| H | -3.49568000 | -2.48719700 | 0.58504600  |
| H | -4.50825700 | -1.11846500 | 1.06714600  |
| H | -4.50106600 | -1.66160800 | -0.61647300 |
| H | -0.76960800 | 1.30508000  | -1.61739300 |
| C | 0.58850100  | 0.37763700  | -0.24850600 |
| C | 1.34791300  | -0.17677500 | -1.28068200 |
| C | 1.05136800  | 0.29420300  | 1.06931800  |
| C | 2.55780800  | -0.81458400 | -1.00190000 |
| H | 0.99112700  | -0.10891900 | -2.30537600 |
| C | 2.26107900  | -0.33861400 | 1.34805600  |
| H | 0.45596600  | 0.73419200  | 1.86279500  |
| C | 3.01662800  | -0.89596800 | 0.31313700  |
| H | 3.14329800  | -1.24131400 | -1.81090900 |
| H | 2.61575400  | -0.39899100 | 2.37285100  |
| H | 3.95963100  | -1.38826300 | 0.53130700  |

#### INT-0

|    |             |             |             |
|----|-------------|-------------|-------------|
| Rh | -0.83303500 | -0.34696100 | 0.24083100  |
| N  | 0.64967000  | 0.86836800  | 0.65942000  |
| C  | -2.19901100 | -2.05181400 | 0.51691900  |
| C  | -2.19719000 | -1.68257900 | -0.85318900 |
| C  | -0.83137900 | -1.80078100 | -1.32832200 |
| C  | -0.02708900 | -2.40676300 | -0.27752600 |

|   |             |             |             |
|---|-------------|-------------|-------------|
| C | -0.84804200 | -2.51386400 | 0.86217600  |
| O | 1.99676400  | 0.47185400  | 0.83236500  |
| C | 0.53256000  | 2.24298600  | 0.44458800  |
| C | -0.90478000 | 2.56819400  | 0.21069400  |
| C | -1.77693800 | 1.47086200  | 0.09038100  |
| C | -1.34699100 | 3.88471500  | 0.12873300  |
| C | -3.13518100 | 1.73992700  | -0.09460800 |
| C | -2.70817600 | 4.13335200  | -0.06695900 |
| H | -0.62421700 | 4.69050400  | 0.21747400  |
| C | -3.59670800 | 3.06242700  | -0.16947700 |
| H | -3.85383700 | 0.93056000  | -0.17791600 |
| H | -3.07310000 | 5.15380900  | -0.13503800 |
| H | -4.65778100 | 3.25290800  | -0.31060500 |
| O | 1.46400400  | 3.03365000  | 0.44764000  |
| C | -0.44538900 | -3.01081700 | 2.21333400  |
| H | 0.63903100  | -2.99270400 | 2.33709900  |
| H | -0.88712200 | -2.40042000 | 3.00549700  |
| H | -0.78783900 | -4.04262100 | 2.36148100  |
| C | 1.41151500  | -2.79913300 | -0.40244200 |
| H | 1.94248700  | -2.67197300 | 0.54395100  |
| H | 1.50211200  | -3.85108000 | -0.69958000 |
| H | 1.91582900  | -2.19181500 | -1.15468000 |
| C | -0.35109700 | -1.48823600 | -2.70763200 |
| H | 0.62492500  | -0.99931700 | -2.67178400 |
| H | -0.26236100 | -2.41033600 | -3.29677200 |
| H | -1.04591400 | -0.82157200 | -3.22166100 |
| C | -3.36878900 | -1.28747500 | -1.69618200 |
| H | -3.15832100 | -0.39333200 | -2.28697500 |
| H | -3.62447600 | -2.09912700 | -2.38762000 |
| H | -4.24996900 | -1.08535700 | -1.08501600 |
| C | -3.37358000 | -2.07936700 | 1.44313300  |
| H | -4.14375100 | -1.37259500 | 1.12759000  |
| H | -3.82330100 | -3.07984300 | 1.47682200  |
| H | -3.07746800 | -1.81350800 | 2.46095100  |
| C | 2.70837200  | 0.33828700  | -0.32587500 |
| O | 2.21118100  | 0.34977400  | -1.42974600 |
| C | 4.20163000  | 0.21806800  | -0.02608100 |
| C | 4.89626500  | -0.43481600 | -1.22861000 |
| H | 4.68069500  | 0.11224800  | -2.14828700 |
| H | 5.97896600  | -0.44593200 | -1.06932300 |
| H | 4.56274200  | -1.46892000 | -1.36504900 |
| C | 4.70830000  | 1.66783100  | 0.16392500  |
| H | 4.15451000  | 2.17322800  | 0.95774100  |
| H | 5.77340000  | 1.65180900  | 0.41761300  |

|   |            |             |             |
|---|------------|-------------|-------------|
| H | 4.57753900 | 2.24608600  | -0.75473900 |
| C | 4.46238200 | -0.59804300 | 1.25211500  |
| H | 3.99377300 | -0.13727800 | 2.12317800  |
| H | 4.08147900 | -1.62040200 | 1.15671400  |
| H | 5.54114900 | -0.65834900 | 1.42894400  |

**EtOH**

|   |             |             |             |
|---|-------------|-------------|-------------|
| C | -1.22175200 | -0.22226100 | 0.00000300  |
| C | 0.08754100  | 0.54848800  | -0.00005900 |
| H | -1.28770400 | -0.85931900 | -0.88675400 |
| H | -1.28573400 | -0.86158700 | 0.88528300  |
| H | -2.07407000 | 0.46438800  | 0.00189200  |
| H | 0.13623900  | 1.20150900  | 0.88663300  |
| H | 0.13638300  | 1.20137100  | -0.88682500 |
| O | 1.14954000  | -0.39872200 | -0.00004100 |
| H | 1.98383400  | 0.08605200  | 0.00043800  |

**I-a**

|    |             |             |             |
|----|-------------|-------------|-------------|
| N  | 1.61132500  | -0.02953300 | 0.59969700  |
| C  | 0.90904300  | -1.81488300 | 1.90419800  |
| C  | 0.98565500  | -2.68340300 | 2.99313700  |
| H  | 1.86808100  | -2.63892200 | 3.62450600  |
| C  | -0.05503100 | -3.57952600 | 3.23625700  |
| H  | -0.01043600 | -4.25458900 | 4.08531200  |
| C  | -1.15608800 | -3.60510700 | 2.37740800  |
| H  | -1.97175700 | -4.30013600 | 2.55850100  |
| C  | -1.22342000 | -2.73471700 | 1.27958700  |
| H  | -2.09296200 | -2.77981300 | 0.62965500  |
| C  | -0.18929700 | -1.82577200 | 1.03138100  |
| C  | 0.66692600  | -0.08343200 | -2.68901000 |
| C  | 1.13684300  | -1.38765700 | -2.25398800 |
| C  | -0.00151700 | -2.23104300 | -2.04741700 |
| C  | -1.17905600 | -1.43457300 | -2.25350400 |
| C  | -0.75169500 | -0.11810100 | -2.68543500 |
| Rh | -0.02923800 | -0.53539400 | -0.55342500 |
| C  | 2.02590600  | -0.88035600 | 1.58348700  |
| O  | 3.13240800  | -0.88413500 | 2.12367800  |
| C  | -1.68904200 | 0.99088400  | -3.04654600 |
| H  | -2.20516600 | 0.76671000  | -3.98712400 |
| H  | -2.44908400 | 1.13225800  | -2.27224500 |
| H  | -1.16170500 | 1.93840400  | -3.17032000 |
| C  | 1.55377500  | 1.04917500  | -3.10195900 |
| H  | 2.01507600  | 0.84868700  | -4.07654500 |
| H  | 0.99432900  | 1.98347900  | -3.18705200 |

|   |             |             |             |
|---|-------------|-------------|-------------|
| H | 2.35196700  | 1.19869200  | -2.37423800 |
| C | 2.57477500  | -1.78903500 | -2.14398700 |
| H | 2.97771600  | -2.05417900 | -3.12921300 |
| H | 3.17283900  | -0.97404700 | -1.73312400 |
| H | 2.69526000  | -2.65183700 | -1.48616700 |
| C | 0.03137700  | -3.69086900 | -1.72288100 |
| H | 0.04746600  | -4.28159000 | -2.64702500 |
| H | 0.91666400  | -3.94963000 | -1.13905400 |
| H | -0.84188000 | -3.99304500 | -1.14274500 |
| C | -2.59452800 | -1.92239800 | -2.24945800 |
| H | -2.87040400 | -2.33267200 | -3.22912100 |
| H | -2.74703500 | -2.71145400 | -1.50927900 |
| H | -3.28954400 | -1.11014300 | -2.02621900 |
| O | 2.69743100  | 0.69932600  | 0.03677000  |
| C | 3.17128100  | 1.71362000  | 0.83033500  |
| O | 2.56136600  | 2.18937400  | 1.75744600  |
| C | 4.57962500  | 2.12777200  | 0.39868400  |
| C | 4.87100200  | 3.52195500  | 0.97115400  |
| H | 4.73909800  | 3.53140700  | 2.05443000  |
| H | 5.90042100  | 3.81084800  | 0.73645400  |
| H | 4.19848200  | 4.27362300  | 0.54567100  |
| C | 5.54881500  | 1.08822400  | 1.00688600  |
| H | 5.31558800  | 0.08281700  | 0.65214900  |
| H | 6.57704700  | 1.34390200  | 0.72841400  |
| H | 5.46992100  | 1.07599300  | 2.09634300  |
| C | 4.72989000  | 2.14315800  | -1.13249300 |
| H | 4.58593500  | 1.14859300  | -1.55957400 |
| H | 4.01576600  | 2.82964600  | -1.59980600 |
| H | 5.73760300  | 2.48164300  | -1.39412700 |
| C | -0.83039800 | 1.37383900  | 0.19064200  |
| C | -1.67361100 | 0.49594000  | 0.45926400  |
| C | -2.95238100 | -0.00508100 | 1.03705300  |
| O | -2.82013400 | -0.29855600 | 2.41639800  |
| H | -2.10661800 | -0.95041300 | 2.49777500  |
| C | -0.16440500 | 2.67470000  | 0.10328900  |
| H | -0.88777100 | 3.46560600  | 0.33227200  |
| H | 0.65711200  | 2.71693200  | 0.82360300  |
| H | 0.24306100  | 2.84870200  | -0.89702400 |
| H | -3.27139600 | -0.89538000 | 0.47784700  |
| C | -3.99620100 | 1.08072500  | 0.85629700  |
| C | -4.88220000 | 1.03437700  | -0.22223500 |
| C | -4.03274100 | 2.16958100  | 1.73321300  |
| C | -5.79270700 | 2.07079500  | -0.43391900 |
| H | -4.86842400 | 0.17867200  | -0.89275300 |

|   |             |            |             |
|---|-------------|------------|-------------|
| C | -4.94578600 | 3.20194300 | 1.52530500  |
| H | -3.35216100 | 2.18732200 | 2.57724400  |
| C | -5.82424300 | 3.15830500 | 0.43943100  |
| H | -6.48085800 | 2.02391800 | -1.27277200 |
| H | -4.97406700 | 4.04247400 | 2.21245100  |
| H | -6.53370000 | 3.96467400 | 0.27972100  |

**TS-a**

|    |             |             |             |
|----|-------------|-------------|-------------|
| N  | 1.39968800  | 0.22221000  | 0.73423900  |
| C  | 0.06405400  | -0.49495400 | 2.48276700  |
| C  | -0.10467300 | -0.81601300 | 3.83034500  |
| H  | 0.52042300  | -0.30590000 | 4.55678000  |
| C  | -1.04082200 | -1.78221800 | 4.20474700  |
| H  | -1.17718800 | -2.03196200 | 5.25225500  |
| C  | -1.79692800 | -2.43524600 | 3.22453000  |
| H  | -2.51779800 | -3.19527600 | 3.51238600  |
| C  | -1.64907100 | -2.09830000 | 1.87893100  |
| H  | -2.27896300 | -2.57334200 | 1.13272300  |
| C  | -0.72569500 | -1.11320900 | 1.48620500  |
| C  | 1.56081300  | -1.61696600 | -2.11296500 |
| C  | 1.94817500  | -2.42652500 | -0.95719500 |
| C  | 0.85850600  | -3.26413900 | -0.61176900 |
| C  | -0.23360700 | -2.95520500 | -1.51353800 |
| C  | 0.23096800  | -1.99254100 | -2.47296500 |
| Rh | 0.26299500  | -1.06108600 | -0.41800400 |
| C  | 1.16897400  | 0.42197500  | 2.05549700  |
| O  | 1.78067800  | 1.17536900  | 2.81582000  |
| C  | -0.55422200 | -1.51127500 | -3.65253900 |
| H  | -0.54581200 | -2.26497900 | -4.44931100 |
| H  | -1.59754700 | -1.32024100 | -3.38810900 |
| H  | -0.13681800 | -0.59147300 | -4.06619400 |
| C  | 2.46642900  | -0.66492200 | -2.83085100 |
| H  | 3.16283000  | -1.19802000 | -3.49045200 |
| H  | 1.89726300  | 0.03928100  | -3.44297800 |
| H  | 3.05142000  | -0.08391500 | -2.11576100 |
| C  | 3.28939800  | -2.35696000 | -0.29621200 |
| H  | 4.04189700  | -2.88014000 | -0.89874200 |
| H  | 3.60720600  | -1.31904500 | -0.17654200 |
| H  | 3.27121500  | -2.81424900 | 0.69476000  |
| C  | 0.80598100  | -4.27252400 | 0.49269400  |
| H  | 0.87492500  | -5.29282000 | 0.09658500  |
| H  | 1.62676700  | -4.12984400 | 1.19817300  |
| H  | -0.12673100 | -4.19366000 | 1.05829200  |
| C  | -1.55639300 | -3.65690400 | -1.56137000 |

|             |             |             |             |
|-------------|-------------|-------------|-------------|
| H           | -1.53806900 | -4.47504100 | -2.29271900 |
| H           | -1.81049100 | -4.09051400 | -0.59191000 |
| H           | -2.36060000 | -2.97477600 | -1.85029400 |
| O           | 2.49196900  | 0.96746700  | 0.23697700  |
| C           | 2.28005900  | 2.31785500  | 0.13234200  |
| O           | 1.19411500  | 2.84074200  | 0.20272100  |
| C           | 3.61026100  | 3.05181600  | -0.03465900 |
| C           | 3.32631900  | 4.46439700  | -0.56235100 |
| H           | 2.63506900  | 4.99324000  | 0.09641900  |
| H           | 4.26017100  | 5.03196800  | -0.62500800 |
| H           | 2.87807000  | 4.43113200  | -1.56051600 |
| C           | 4.24350500  | 3.12350600  | 1.37407000  |
| H           | 4.40551200  | 2.12306100  | 1.77969000  |
| H           | 5.20166200  | 3.65142200  | 1.31745800  |
| H           | 3.58757400  | 3.65649500  | 2.06678400  |
| C           | 4.55180300  | 2.30314600  | -0.99498300 |
| H           | 4.79284000  | 1.30600400  | -0.62115100 |
| H           | 4.10725300  | 2.20229300  | -1.99102800 |
| H           | 5.48593900  | 2.86425400  | -1.10135900 |
| C           | -0.94609900 | 0.55754100  | -0.74961200 |
| C           | -1.61276400 | 0.18926300  | 0.28410600  |
| C           | -2.91507900 | 0.47847100  | 0.99864300  |
| O           | -2.72194100 | 1.05455300  | 2.27221900  |
| H           | -1.97773800 | 0.60710700  | 2.70056300  |
| C           | -0.92412600 | 1.58895600  | -1.80982900 |
| H           | -1.91206800 | 2.04341500  | -1.93291800 |
| H           | -0.21605800 | 2.36608500  | -1.50871300 |
| H           | -0.59650100 | 1.17467600  | -2.76595500 |
| H           | -3.48133400 | -0.46110600 | 1.08171000  |
| C           | -3.68781200 | 1.44873500  | 0.12589900  |
| C           | -4.49181200 | 0.96326700  | -0.90926700 |
| C           | -3.53250400 | 2.82690500  | 0.29283500  |
| C           | -5.13363300 | 1.84642300  | -1.77629200 |
| H           | -4.60975700 | -0.11021000 | -1.03693100 |
| C           | -4.17815900 | 3.71093800  | -0.57232300 |
| H           | -2.90466500 | 3.18750200  | 1.09895800  |
| C           | -4.97573300 | 3.22454600  | -1.60980000 |
| H           | -5.75874000 | 1.46197400  | -2.57691500 |
| H           | -4.05363800 | 4.78140300  | -0.43869500 |
| H           | -5.47538700 | 3.91452600  | -2.28328900 |
| <b>II-a</b> |             |             |             |
| N           | 0.54549300  | 1.37072000  | 0.75243800  |
| C           | 0.85641800  | -0.33637800 | 2.26263000  |

|    |             |             |             |
|----|-------------|-------------|-------------|
| C  | 1.91434200  | -0.52103300 | 3.16948700  |
| H  | 2.28467400  | 0.34302900  | 3.71186500  |
| C  | 2.46360500  | -1.77881700 | 3.37201700  |
| H  | 3.28171100  | -1.90830200 | 4.07427800  |
| C  | 1.95342000  | -2.88729100 | 2.67552700  |
| H  | 2.37854900  | -3.87334800 | 2.83792300  |
| C  | 0.89388700  | -2.72443200 | 1.79676100  |
| H  | 0.47817700  | -3.58052600 | 1.27333700  |
| C  | 0.31141100  | -1.45531800 | 1.56517300  |
| C  | 2.13183900  | 0.62194300  | -2.15278500 |
| C  | 3.19036900  | 0.86884000  | -1.16082300 |
| C  | 3.61533500  | -0.36967700 | -0.67365500 |
| C  | 2.85708600  | -1.42072500 | -1.36947900 |
| C  | 2.03559400  | -0.81022300 | -2.35427500 |
| Rh | 1.29930500  | -0.18797300 | -0.37230700 |
| C  | 0.30914500  | 1.06675800  | 2.04770600  |
| O  | -0.18903700 | 1.75794400  | 2.92943200  |
| C  | 1.24615100  | -1.50494900 | -3.41853100 |
| H  | 1.87249300  | -1.67830600 | -4.30248000 |
| H  | 0.87511900  | -2.47323000 | -3.07542000 |
| H  | 0.38701800  | -0.90970800 | -3.73135600 |
| C  | 1.47830800  | 1.68976100  | -2.97115200 |
| H  | 2.15160500  | 2.04739900  | -3.76088000 |
| H  | 0.56753200  | 1.32143500  | -3.44787100 |
| H  | 1.20715400  | 2.54117800  | -2.34265400 |
| C  | 3.60204600  | 2.23534500  | -0.71247400 |
| H  | 4.06640700  | 2.79311100  | -1.53393100 |
| H  | 2.73231500  | 2.80224600  | -0.36674500 |
| H  | 4.31662500  | 2.18806600  | 0.11143000  |
| C  | 4.59913100  | -0.64839200 | 0.41788100  |
| H  | 5.44532000  | -1.23493500 | 0.04145200  |
| H  | 4.99093200  | 0.27466800  | 0.84903800  |
| H  | 4.13315800  | -1.22137600 | 1.22699500  |
| C  | 3.06791500  | -2.88737300 | -1.15640400 |
| H  | 3.97709100  | -3.22989400 | -1.66668200 |
| H  | 3.17473100  | -3.11515600 | -0.09280300 |
| H  | 2.22618300  | -3.46788400 | -1.54002000 |
| O  | -0.02109700 | 2.58461700  | 0.28769300  |
| C  | -1.38071900 | 2.66574300  | 0.32164800  |
| O  | -2.12188200 | 1.75318800  | 0.61183300  |
| C  | -1.83197600 | 4.08254500  | -0.03202000 |
| C  | -3.35455500 | 4.07673100  | -0.22013100 |
| H  | -3.85811400 | 3.72155900  | 0.68125600  |
| H  | -3.70276400 | 5.09030800  | -0.44202400 |



|   |             |             |             |
|---|-------------|-------------|-------------|
| H | -3.64796900 | 3.42131700  | -1.04520200 |
| C | -1.44132400 | 4.99328200  | 1.15309400  |
| H | -0.35778200 | 5.01410700  | 1.28915300  |
| H | -1.79350300 | 6.01269400  | 0.96420600  |
| H | -1.89095600 | 4.63599700  | 2.08361900  |
| C | -1.13546000 | 4.56181900  | -1.32012100 |
| H | -0.05131200 | 4.60081100  | -1.19468900 |
| H | -1.36267100 | 3.89972600  | -2.16265200 |
| H | -1.48882800 | 5.56559100  | -1.57692800 |
| C | -0.64527400 | -0.73637800 | -0.48935100 |
| C | -0.90235700 | -1.34644000 | 0.67311600  |
| C | -2.23846000 | -1.71174300 | 1.30281500  |
| O | -2.65006200 | -0.65801600 | 2.16263100  |
| H | -2.46421300 | 0.18236900  | 1.70654200  |
| C | -1.55091100 | -0.36262600 | -1.61831900 |
| H | -2.58973800 | -0.26839700 | -1.29801000 |
| H | -1.24202800 | 0.59295700  | -2.05289400 |
| H | -1.51736000 | -1.11734100 | -2.41249900 |
| H | -2.07159900 | -2.57180300 | 1.96725400  |
| C | -3.30434900 | -2.11756300 | 0.29519000  |
| C | -3.05951900 | -3.16431600 | -0.60177200 |
| C | -4.53874100 | -1.46713600 | 0.25869500  |
| C | -4.02419400 | -3.54127600 | -1.53331900 |
| H | -2.09825000 | -3.67170500 | -0.57647200 |
| C | -5.50554300 | -1.83973600 | -0.67797000 |
| H | -4.72235100 | -0.66829800 | 0.96805300  |
| C | -5.25168300 | -2.87423900 | -1.57833800 |
| H | -3.82024100 | -4.35291800 | -2.22633900 |
| H | -6.45974400 | -1.32079400 | -0.70182600 |
| H | -6.00356200 | -3.16304900 | -2.30694000 |

**I-b**

|   |             |             |             |
|---|-------------|-------------|-------------|
| N | -0.40080500 | 0.67001100  | 0.72582700  |
| C | 0.83789900  | -0.07207100 | 2.57578500  |
| C | 1.05999700  | -0.28915700 | 3.93828300  |
| H | 0.32215600  | 0.07561800  | 4.64668700  |
| C | 2.22324400  | -0.93454600 | 4.35039900  |
| H | 2.40901200  | -1.11105400 | 5.40548700  |
| C | 3.15919300  | -1.34207500 | 3.39432400  |
| H | 4.07430600  | -1.83751800 | 3.70929500  |
| C | 2.92889600  | -1.12228700 | 2.03228900  |
| H | 3.66351000  | -1.46637500 | 1.31046600  |
| C | 1.75927800  | -0.48737300 | 1.60468600  |
| C | 1.28708400  | 1.41055100  | -2.07341400 |

|    |             |             |             |
|----|-------------|-------------|-------------|
| C  | 2.13821400  | 1.83299300  | -0.96937900 |
| C  | 3.20637500  | 0.88117500  | -0.84449800 |
| C  | 2.95395800  | -0.18427900 | -1.76698900 |
| C  | 1.78087200  | 0.17386800  | -2.54756600 |
| Rh | 1.22322000  | -0.07579000 | -0.33622600 |
| C  | -0.30808100 | 0.74463100  | 2.10107200  |
| O  | -1.03802000 | 1.42417100  | 2.82209500  |
| C  | 1.21581400  | -0.62684200 | -3.67784100 |
| H  | 1.75153900  | -0.40712300 | -4.60958400 |
| H  | 1.31085100  | -1.69898900 | -3.48739400 |
| H  | 0.15876200  | -0.39872000 | -3.82309300 |
| C  | 0.12484500  | 2.16462900  | -2.64019300 |
| H  | 0.41367000  | 2.66477800  | -3.57274400 |
| H  | -0.70698700 | 1.48734900  | -2.84702300 |
| H  | -0.22324500 | 2.92479600  | -1.94176400 |
| C  | 2.01888500  | 3.12660200  | -0.22521700 |
| H  | 2.45683300  | 3.94900000  | -0.80467600 |
| H  | 0.97291600  | 3.36439600  | -0.02831100 |
| H  | 2.53790600  | 3.07822300  | 0.73451600  |
| C  | 4.39870300  | 1.03382100  | 0.04575300  |
| H  | 5.11329000  | 1.72916400  | -0.41141600 |
| H  | 4.12246300  | 1.42583100  | 1.02617400  |
| H  | 4.91341200  | 0.08464700  | 0.20104200  |
| C  | 3.82291200  | -1.37685700 | -2.02170000 |
| H  | 4.52339200  | -1.18610800 | -2.84414100 |
| H  | 4.41200400  | -1.63941300 | -1.13966200 |
| H  | 3.22151900  | -2.24747400 | -2.29547200 |
| O  | -1.00194200 | 1.89610300  | 0.26973100  |
| C  | -2.34432000 | 1.89072900  | 0.16074000  |
| O  | -3.01597100 | 0.88562200  | 0.01281900  |
| C  | -2.94876600 | 3.29140600  | 0.24460600  |
| C  | -3.88000500 | 3.48325100  | -0.96547900 |
| H  | -4.60675300 | 2.67031800  | -1.02314200 |
| H  | -4.41773900 | 4.43214200  | -0.87393500 |
| H  | -3.31254000 | 3.50397200  | -1.90236200 |
| C  | -3.76771700 | 3.29276300  | 1.55710300  |
| H  | -3.11709400 | 3.08282100  | 2.40970900  |
| H  | -4.23799900 | 4.27225200  | 1.69239800  |
| H  | -4.54713300 | 2.52802900  | 1.52126100  |
| C  | -1.89103900 | 4.40203100  | 0.30032100  |
| H  | -1.22481200 | 4.26563400  | 1.15448200  |
| H  | -1.28535500 | 4.43326100  | -0.61072300 |
| H  | -2.39104400 | 5.37097800  | 0.39965200  |
| C  | -0.08279200 | -1.74691200 | -0.85738500 |

|   |             |             |             |
|---|-------------|-------------|-------------|
| C | 0.86674500  | -2.29740200 | -0.26877700 |
| C | 1.65666000  | -3.38987600 | 0.31316000  |
| C | -1.37867900 | -1.77085500 | -1.60573600 |
| H | -1.18537600 | -2.33340300 | -2.52726000 |
| H | 2.70440300  | -3.34562400 | 0.00124600  |
| O | -1.82899300 | -0.50095400 | -2.02636700 |
| H | -2.24463100 | -0.06620900 | -1.25165400 |
| C | -2.41398800 | -2.53468000 | -0.79272700 |
| C | -3.15048300 | -3.56115900 | -1.38834400 |
| C | -2.65498800 | -2.19885000 | 0.54577400  |
| C | -4.12088600 | -4.25003400 | -0.65880900 |
| H | -2.96542300 | -3.82055300 | -2.42778400 |
| C | -3.62761300 | -2.88254500 | 1.27129700  |
| H | -2.08943900 | -1.39380600 | 1.00194000  |
| C | -4.36025100 | -3.91101100 | 0.67291000  |
| H | -4.68695900 | -5.04848600 | -1.12964000 |
| H | -3.81369500 | -2.61176500 | 2.30629300  |
| H | -5.11447400 | -4.44539900 | 1.24319000  |
| H | 1.63266000  | -3.35692500 | 1.40441700  |
| H | 1.23643700  | -4.34514300 | -0.02001300 |

**TS-b**

|    |             |             |             |
|----|-------------|-------------|-------------|
| N  | 0.16670500  | 1.11256400  | 0.81147500  |
| C  | 0.96990500  | -0.20844000 | 2.54221400  |
| C  | 1.42717400  | -0.36280400 | 3.84961700  |
| H  | 1.09193400  | 0.35172100  | 4.59513400  |
| C  | 2.31781300  | -1.39286800 | 4.15885400  |
| H  | 2.67750000  | -1.51442900 | 5.17612900  |
| C  | 2.75674800  | -2.26092200 | 3.15332100  |
| H  | 3.46032300  | -3.05470500 | 3.38914400  |
| C  | 2.27541900  | -2.12609900 | 1.85041900  |
| H  | 2.57293700  | -2.84071400 | 1.08802200  |
| C  | 1.37134600  | -1.10260000 | 1.52773500  |
| C  | 1.59869400  | 0.96303200  | -2.21799800 |
| C  | 2.65245200  | 1.20762000  | -1.23096600 |
| C  | 3.34096900  | -0.01009500 | -1.00573000 |
| C  | 2.70158500  | -1.03612500 | -1.80850500 |
| C  | 1.67787200  | -0.40796200 | -2.60216400 |
| Rh | 1.14302400  | -0.23415000 | -0.42747200 |
| C  | 0.17667500  | 1.00480600  | 2.16518100  |
| O  | -0.31851000 | 1.79234400  | 2.97603200  |
| C  | 0.85818600  | -1.06420200 | -3.66853100 |
| H  | 1.35319400  | -0.96128900 | -4.64215700 |
| H  | 0.73175500  | -2.13260700 | -3.47645500 |

|   |             |             |             |
|---|-------------|-------------|-------------|
| H | -0.12960800 | -0.60560300 | -3.73770000 |
| C | 0.68553400  | 1.99895700  | -2.79534500 |
| H | 1.13790900  | 2.48010300  | -3.67188600 |
| H | -0.26595600 | 1.55166200  | -3.08985900 |
| H | 0.47389500  | 2.77299200  | -2.05592100 |
| C | 2.93710700  | 2.53792700  | -0.60670500 |
| H | 3.51637400  | 3.16919600  | -1.29162200 |
| H | 2.00889900  | 3.05918000  | -0.36561300 |
| H | 3.50707200  | 2.42977000  | 0.31821200  |
| C | 4.51046200  | -0.22777100 | -0.09819500 |
| H | 5.43887400  | -0.31748000 | -0.67506800 |
| H | 4.62781700  | 0.60172400  | 0.60156000  |
| H | 4.39285900  | -1.13929600 | 0.49350000  |
| C | 3.15739300  | -2.45772200 | -1.93093900 |
| H | 3.87915700  | -2.57069500 | -2.74995400 |
| H | 3.64682900  | -2.79623600 | -1.01469900 |
| H | 2.31882800  | -3.12909300 | -2.13315600 |
| O | -0.28700600 | 2.39421900  | 0.39680700  |
| C | -1.62087200 | 2.53992200  | 0.27094000  |
| O | -2.40821900 | 1.61298800  | 0.20612300  |
| C | -2.03604100 | 4.00777900  | 0.27228300  |
| C | -3.22988900 | 4.18433800  | -0.67836500 |
| H | -4.02991300 | 3.48459300  | -0.42988600 |
| H | -3.61656700 | 5.20523000  | -0.60204800 |
| H | -2.93569100 | 4.00926800  | -1.71874400 |
| C | -2.46249200 | 4.28773000  | 1.73525300  |
| H | -1.65071000 | 4.04558700  | 2.42549500  |
| H | -2.73181600 | 5.34379600  | 1.84055100  |
| H | -3.32823300 | 3.67699000  | 2.00463400  |
| C | -0.88719400 | 4.94859700  | -0.12235100 |
| H | -0.04602300 | 4.86289000  | 0.56789500  |
| H | -0.52653800 | 4.73995900  | -1.13489700 |
| H | -1.24671700 | 5.98234100  | -0.10262100 |
| C | -0.60463500 | -1.30122400 | -0.46306900 |
| C | -0.21532900 | -1.92511100 | 0.58280400  |
| C | -0.52873800 | -3.07587300 | 1.46601600  |
| C | -1.73444900 | -1.33675600 | -1.44937500 |
| H | -1.40264700 | -1.93915900 | -2.30208400 |
| H | 0.21072100  | -3.87617200 | 1.37117400  |
| O | -2.03121800 | -0.06051200 | -1.98434800 |
| H | -2.17871500 | 0.53934300  | -1.22757400 |
| C | -2.93132900 | -2.03716700 | -0.82410400 |
| C | -3.31006600 | -3.30460100 | -1.27314700 |
| C | -3.62443900 | -1.45187300 | 0.24408900  |

|   |             |             |             |
|---|-------------|-------------|-------------|
| C | -4.36824800 | -3.98691800 | -0.66832900 |
| H | -2.77195600 | -3.76138800 | -2.10056000 |
| C | -4.68338800 | -2.13030800 | 0.84340700  |
| H | -3.32934300 | -0.47143700 | 0.60226200  |
| C | -5.05695700 | -3.39966700 | 0.39237700  |
| H | -4.65315900 | -4.97169600 | -1.02715300 |
| H | -5.21643700 | -1.66969000 | 1.67000300  |
| H | -5.88054200 | -3.92609700 | 0.86564500  |
| H | -0.56958200 | -2.77410400 | 2.51580900  |
| H | -1.50773400 | -3.45955500 | 1.15936400  |

**II-b**

|    |             |             |             |
|----|-------------|-------------|-------------|
| N  | -0.28283500 | 0.74097500  | 0.97737800  |
| C  | 1.23877300  | -0.60374900 | 2.21074400  |
| C  | 2.34903500  | -0.25880800 | 3.01239500  |
| H  | 2.27787200  | 0.64940300  | 3.60044900  |
| C  | 3.47923000  | -1.05745100 | 3.06604100  |
| H  | 4.32052900  | -0.76888700 | 3.68881800  |
| C  | 3.52248700  | -2.24938400 | 2.32518200  |
| H  | 4.40076700  | -2.88702200 | 2.36595300  |
| C  | 2.43009600  | -2.62095100 | 1.55934200  |
| H  | 2.44974700  | -3.55444700 | 1.00525900  |
| C  | 1.26352900  | -1.82338100 | 1.47359400  |
| C  | 1.25926700  | 1.25438400  | -2.12573100 |
| C  | 2.19031500  | 1.87689600  | -1.17883200 |
| C  | 3.17330100  | 0.93081100  | -0.86823600 |
| C  | 2.90264300  | -0.29160500 | -1.64047700 |
| C  | 1.78424900  | -0.05159700 | -2.48241600 |
| Rh | 1.10913500  | 0.00533000  | -0.39637500 |
| C  | 0.12306100  | 0.43846700  | 2.24121800  |
| O  | -0.20445300 | 0.99006400  | 3.28796200  |
| C  | 1.25397400  | -0.94088900 | -3.56085400 |
| H  | 1.70687900  | -0.67303600 | -4.52385000 |
| H  | 1.49045800  | -1.98826400 | -3.35997300 |
| H  | 0.17114300  | -0.83908600 | -3.63816300 |
| C  | 0.14840100  | 1.97480200  | -2.81844500 |
| H  | 0.54295500  | 2.53022500  | -3.67986300 |
| H  | -0.60977500 | 1.27374100  | -3.16474500 |
| H  | -0.32943100 | 2.69516400  | -2.15099000 |
| C  | 2.02226900  | 3.25499900  | -0.62070300 |
| H  | 2.18130000  | 4.01251100  | -1.39726300 |
| H  | 1.01477300  | 3.38967500  | -0.22139400 |
| H  | 2.72862300  | 3.44801300  | 0.18919000  |
| C  | 4.29649100  | 1.05268600  | 0.10993600  |

|   |             |             |             |
|---|-------------|-------------|-------------|
| H | 5.26253200  | 1.02544300  | -0.40818600 |
| H | 4.23942500  | 1.98424500  | 0.67569400  |
| H | 4.28248600  | 0.22541700  | 0.82680100  |
| C | 3.77820600  | -1.50537000 | -1.62984400 |
| H | 4.66453500  | -1.35012600 | -2.25810300 |
| H | 4.12092200  | -1.73536900 | -0.61787000 |
| H | 3.24418300  | -2.37865500 | -2.00994900 |
| O | -0.84565900 | 2.05492200  | 0.97873700  |
| C | -1.96492700 | 2.23178700  | 0.25830300  |
| O | -2.43606300 | 1.42039500  | -0.51485000 |
| C | -2.59300000 | 3.58789000  | 0.58585300  |
| C | -3.70973300 | 3.87698900  | -0.42425100 |
| H | -4.45698700 | 3.08094700  | -0.42145100 |
| H | -4.20018900 | 4.82184000  | -0.17061000 |
| H | -3.31270300 | 3.95673400  | -1.44064500 |
| C | -3.16968300 | 3.46531100  | 2.01580600  |
| H | -2.38885400 | 3.18869300  | 2.72843400  |
| H | -3.61002900 | 4.42096900  | 2.31803600  |
| H | -3.95382100 | 2.70252500  | 2.05269300  |
| C | -1.53165000 | 4.70338000  | 0.54622800  |
| H | -0.74088000 | 4.52694700  | 1.27801500  |
| H | -1.07671400 | 4.78392100  | -0.44726800 |
| H | -2.00463800 | 5.66403100  | 0.77366100  |
| C | -0.20205600 | -1.56938500 | -0.39357900 |
| C | 0.10557100  | -2.33484500 | 0.66212400  |
| C | -0.51876800 | -3.63344500 | 1.12132300  |
| C | -1.32405400 | -1.78240600 | -1.38839800 |
| H | -1.00147700 | -2.53806800 | -2.11695100 |
| H | 0.25483200  | -4.36625400 | 1.37832600  |
| O | -1.58784400 | -0.61802600 | -2.16708800 |
| H | -1.86185200 | 0.08236300  | -1.54267000 |
| C | -2.61202900 | -2.27030300 | -0.73966000 |
| C | -3.33901100 | -3.31486300 | -1.31672600 |
| C | -3.10538700 | -1.65642700 | 0.41900200  |
| C | -4.53574500 | -3.75131500 | -0.74558300 |
| H | -2.96207400 | -3.79252800 | -2.21781900 |
| C | -4.30231500 | -2.08672600 | 0.98711000  |
| H | -2.53810500 | -0.85040200 | 0.87105000  |
| C | -5.01988700 | -3.13765100 | 0.40966700  |
| H | -5.08696500 | -4.56888000 | -1.20148000 |
| H | -4.67366800 | -1.60555500 | 1.88752000  |
| H | -5.94866700 | -3.47651700 | 0.85935500  |
| H | -1.12343800 | -3.47329500 | 2.02310400  |
| H | -1.16868500 | -4.06903700 | 0.36322900  |

**TS-asMD**

|    |             |             |             |
|----|-------------|-------------|-------------|
| N  | 1.50032100  | -0.06066100 | 0.77571000  |
| C  | 0.16173500  | -0.81024600 | 2.48720000  |
| C  | -0.01592400 | -1.24209200 | 3.79953400  |
| H  | 0.70437700  | -0.92683300 | 4.55305600  |
| C  | -1.07504600 | -2.08140700 | 4.12391100  |
| H  | -1.21263200 | -2.42344100 | 5.14691500  |
| C  | -1.95107000 | -2.49803900 | 3.11908000  |
| H  | -2.77130500 | -3.17283500 | 3.35681700  |
| C  | -1.79653900 | -2.04394300 | 1.81190400  |
| H  | -2.51402500 | -2.35329000 | 1.05187600  |
| C  | -0.74894300 | -1.17229900 | 1.47105400  |
| C  | 1.19288700  | -1.57212000 | -2.32930700 |
| C  | 1.52570200  | -2.54305900 | -1.29392100 |
| C  | 0.34800500  | -3.25120400 | -0.93783700 |
| C  | -0.73892300 | -2.68564500 | -1.69769800 |
| C  | -0.20100800 | -1.69154000 | -2.59206200 |
| Rh | 0.11858400  | -1.05161500 | -0.46882100 |
| C  | 1.36579900  | -0.02589400 | 2.11490700  |
| O  | 2.12170800  | 0.53526400  | 2.92379600  |
| C  | -1.00048400 | -0.95493000 | -3.60833800 |
| H  | -1.22157100 | -1.60745900 | -4.46402500 |
| H  | -1.96351200 | -0.62278800 | -3.20068100 |
| H  | -0.47023900 | -0.07665600 | -3.98974300 |
| C  | 2.17328400  | -0.69399300 | -3.02510200 |
| H  | 2.71665700  | -1.24819200 | -3.80287900 |
| H  | 1.68309800  | 0.15818200  | -3.50920800 |
| H  | 2.91871500  | -0.29721000 | -2.32566300 |
| C  | 2.88559200  | -2.77742100 | -0.73972000 |
| H  | 3.39171300  | -3.57963300 | -1.29378500 |
| H  | 3.51222600  | -1.88182100 | -0.80929700 |
| H  | 2.84180400  | -3.07868100 | 0.31339100  |
| C  | 0.26265100  | -4.34699200 | 0.06624400  |
| H  | 0.59222700  | -5.30172900 | -0.36485300 |
| H  | 0.89927200  | -4.14166500 | 0.93615700  |
| H  | -0.76063100 | -4.48658000 | 0.43051600  |
| C  | -2.15722100 | -3.13817300 | -1.69846100 |
| H  | -2.34516000 | -3.80663800 | -2.55016700 |
| H  | -2.41500400 | -3.68673300 | -0.78662600 |
| H  | -2.84937800 | -2.29259200 | -1.79377100 |
| O  | 2.57740500  | 0.69341700  | 0.28670100  |
| C  | 2.48438800  | 2.03876100  | 0.45187400  |
| O  | 1.51630300  | 2.59938700  | 0.91096400  |

|   |             |             |             |
|---|-------------|-------------|-------------|
| C | 3.78147500  | 2.71152200  | 0.04336300  |
| C | 3.52101600  | 4.20160500  | -0.13655900 |
| H | 3.14175500  | 4.65571900  | 0.78539100  |
| H | 4.45356800  | 4.70862100  | -0.41228500 |
| H | 2.78536400  | 4.38183500  | -0.93126100 |
| C | 4.75872300  | 2.48096100  | 1.20325800  |
| H | 4.96643300  | 1.41338800  | 1.34275200  |
| H | 5.70566700  | 2.99518900  | 0.99562000  |
| H | 4.35077000  | 2.87430500  | 2.14344600  |
| C | 4.34045300  | 2.11933400  | -1.24885400 |
| H | 4.61066500  | 1.06343700  | -1.13618800 |
| H | 3.61858100  | 2.20727700  | -2.07237100 |
| H | 5.24538300  | 2.66957200  | -1.53560100 |
| C | -0.71602800 | 0.83337900  | -0.54013500 |
| C | -1.46515100 | 0.32970200  | 0.37243300  |
| C | -2.85730400 | 0.55794200  | 0.91094900  |
| O | -2.89363800 | 0.79781800  | 2.29784400  |
| H | -2.73557700 | -0.04377900 | 2.74859800  |
| C | -0.44668500 | 1.93093800  | -1.47725000 |
| H | -0.86659300 | 2.87642700  | -1.10879200 |
| H | 0.62952200  | 2.06971200  | -1.64183500 |
| H | -0.90236500 | 1.71208900  | -2.45277900 |
| H | -3.48087400 | -0.31472900 | 0.65109500  |
| C | -3.39101400 | 1.76891100  | 0.18490100  |
| C | -3.99980400 | 1.60794000  | -1.05982300 |
| C | -3.19169700 | 3.05177100  | 0.69275800  |
| C | -4.40393700 | 2.71772300  | -1.79434300 |
| H | -4.15119700 | 0.60219800  | -1.45428400 |
| C | -3.60207600 | 4.16302700  | -0.04025400 |
| H | -2.71045600 | 3.17764800  | 1.66037400  |
| C | -4.20393000 | 3.99953600  | -1.28510900 |
| H | -4.87914300 | 2.58230800  | -2.76385200 |
| H | -3.44581600 | 5.16175400  | 0.36257300  |
| H | -4.51865300 | 4.86950900  | -1.85771100 |

**TS-b<sub>SMD</sub>**

|   |            |             |            |
|---|------------|-------------|------------|
| N | 0.19666200 | 1.14392600  | 0.90465500 |
| C | 1.04945400 | -0.23923400 | 2.53689500 |
| C | 1.53061000 | -0.45862200 | 3.82599900 |
| H | 1.20522500 | 0.20610800  | 4.62508700 |
| C | 2.44014700 | -1.48241600 | 4.06633400 |
| H | 2.82067700 | -1.65227600 | 5.07100800 |
| C | 2.88028700 | -2.27498800 | 3.00518800 |
| H | 3.61449100 | -3.05959600 | 3.17929200 |



|    |             |             |             |
|----|-------------|-------------|-------------|
| C  | 2.37396900  | -2.08268300 | 1.72409500  |
| H  | 2.69081300  | -2.74374600 | 0.91664500  |
| C  | 1.43326000  | -1.07581900 | 1.47046600  |
| C  | 1.51951800  | 1.01135400  | -2.26709200 |
| C  | 2.55083100  | 1.30279100  | -1.27793800 |
| C  | 3.29260200  | 0.11807500  | -1.03222400 |
| C  | 2.69665400  | -0.93512500 | -1.81880100 |
| C  | 1.64329700  | -0.36333200 | -2.61778500 |
| Rh | 1.13598500  | -0.17312800 | -0.45120800 |
| C  | 0.25326700  | 0.97995600  | 2.23907700  |
| O  | -0.21910000 | 1.74070300  | 3.09868200  |
| C  | 0.86397900  | -1.11448700 | -3.63758600 |
| H  | 1.43862500  | -1.19105700 | -4.57080300 |
| H  | 0.65438300  | -2.13742200 | -3.30232300 |
| H  | -0.08775700 | -0.62589000 | -3.87153000 |
| C  | 0.59567800  | 2.02286700  | -2.85393900 |
| H  | 1.15552300  | 2.76951800  | -3.43341400 |
| H  | -0.13796100 | 1.56122600  | -3.52243700 |
| H  | 0.04284100  | 2.56102200  | -2.07293500 |
| C  | 2.80385500  | 2.63785400  | -0.67295900 |
| H  | 3.60992700  | 3.15433600  | -1.21156900 |
| H  | 1.91443700  | 3.27484200  | -0.71569200 |
| H  | 3.10938800  | 2.55169400  | 0.37641100  |
| C  | 4.45524100  | -0.00616600 | -0.11284000 |
| H  | 5.38995700  | 0.24742700  | -0.63049700 |
| H  | 4.35856600  | 0.66901100  | 0.74604600  |
| H  | 4.55915200  | -1.02421700 | 0.27766000  |
| C  | 3.15864500  | -2.34697100 | -1.92178400 |
| H  | 3.65593200  | -2.51919500 | -2.88626600 |
| H  | 3.87298700  | -2.60026400 | -1.13217000 |
| H  | 2.31667300  | -3.04851000 | -1.86078800 |
| O  | -0.33675800 | 2.39084100  | 0.52864700  |
| C  | -1.67089800 | 2.50477600  | 0.56937300  |
| O  | -2.42226300 | 1.58141300  | 0.82723600  |
| C  | -2.14822500 | 3.91148900  | 0.26946400  |
| C  | -3.17787900 | 3.81105700  | -0.85712300 |
| H  | -4.00473300 | 3.14547000  | -0.58545200 |
| H  | -3.59085600 | 4.80504900  | -1.06827800 |
| H  | -2.71767300 | 3.42992900  | -1.77906400 |
| C  | -2.81292400 | 4.40231900  | 1.56104500  |
| H  | -2.09197700 | 4.41528000  | 2.38940400  |
| H  | -3.19249200 | 5.42124800  | 1.41632400  |
| H  | -3.65122200 | 3.75692500  | 1.84632100  |
| C  | -1.02744800 | 4.86432600  | -0.12773700 |

|   |             |             |             |
|---|-------------|-------------|-------------|
| H | -0.27268800 | 4.95916200  | 0.66141800  |
| H | -0.52569700 | 4.54365200  | -1.04951500 |
| H | -1.45414700 | 5.85863000  | -0.30908500 |
| C | -0.67227000 | -1.17612900 | -0.44769100 |
| C | -0.11922000 | -1.87586400 | 0.47021300  |
| C | -0.24872200 | -3.18349700 | 1.15469600  |
| C | -1.84846800 | -1.13993900 | -1.35886600 |
| H | -1.52795100 | -1.56839400 | -2.32073100 |
| H | 0.53877500  | -3.88208200 | 0.84770600  |
| O | -2.27841100 | 0.17410700  | -1.65685400 |
| H | -2.45466500 | 0.62313100  | -0.81261300 |
| C | -2.94080900 | -2.01944100 | -0.79261300 |
| C | -3.18304200 | -3.27396400 | -1.34981300 |
| C | -3.65447500 | -1.62367000 | 0.34205700  |
| C | -4.12651800 | -4.12803300 | -0.78271300 |
| H | -2.62156100 | -3.58397600 | -2.23139200 |
| C | -4.59909200 | -2.47344900 | 0.90523400  |
| H | -3.46152900 | -0.64943500 | 0.79137100  |
| C | -4.83489800 | -3.72920100 | 0.34662300  |
| H | -4.30684000 | -5.10567300 | -1.22528100 |
| H | -5.15063800 | -2.15880700 | 1.78890800  |
| H | -5.57092700 | -4.39506700 | 0.79228900  |
| H | -0.21296400 | -3.08783200 | 2.24625000  |
| H | -1.21623400 | -3.61646100 | 0.86629000  |

**I-als**

|    |             |             |             |
|----|-------------|-------------|-------------|
| N  | 1.51459400  | 0.13777100  | 0.29175700  |
| C  | 0.77847000  | -0.09581500 | 2.47122100  |
| C  | 0.78002200  | 0.16700700  | 3.84254300  |
| H  | 1.58928900  | 0.76335300  | 4.25324800  |
| C  | -0.24812700 | -0.33469000 | 4.63776600  |
| H  | -0.26330200 | -0.13400000 | 5.70467600  |
| C  | -1.26830800 | -1.08896300 | 4.05081400  |
| H  | -2.08328800 | -1.46651800 | 4.66279200  |
| C  | -1.26277900 | -1.34952400 | 2.67745600  |
| H  | -2.08539500 | -1.90939900 | 2.24282600  |
| C  | -0.23176100 | -0.86098200 | 1.87632600  |
| C  | 0.93164800  | -2.56682000 | -1.75193100 |
| C  | 1.39149400  | -2.99016200 | -0.44495100 |
| C  | 0.26123100  | -3.44855100 | 0.30486300  |
| C  | -0.91443100 | -3.22990800 | -0.49491400 |
| C  | -0.48418100 | -2.72109600 | -1.77783100 |
| Rh | 0.04232900  | -1.23314800 | -0.12857400 |
| C  | 1.84768000  | 0.42903500  | 1.58241800  |

|   |             |             |             |
|---|-------------|-------------|-------------|
| O | 2.84623400  | 1.05873400  | 1.94457300  |
| C | -1.41509200 | -2.42307700 | -2.91124200 |
| H | -1.90856400 | -3.33999400 | -3.25200900 |
| H | -2.19284600 | -1.71796700 | -2.60162300 |
| H | -0.88789400 | -1.99019500 | -3.76285200 |
| C | 1.82486000  | -2.11208500 | -2.86485300 |
| H | 2.36838900  | -2.95878100 | -3.30138900 |
| H | 1.25578500  | -1.63656500 | -3.66666500 |
| H | 2.55968600  | -1.39032500 | -2.50330400 |
| C | 2.82146900  | -3.00156400 | -0.00127700 |
| H | 3.33549500  | -3.89868500 | -0.36749200 |
| H | 3.34944400  | -2.12437700 | -0.38087800 |
| H | 2.89809900  | -2.98883700 | 1.08759400  |
| C | 0.31068200  | -4.08919400 | 1.65502600  |
| H | 0.46980100  | -5.16963500 | 1.55210700  |
| H | 1.12331500  | -3.68033800 | 2.25851900  |
| H | -0.61515900 | -3.93112500 | 2.20902700  |
| C | -2.31876900 | -3.62767800 | -0.15883900 |
| H | -2.55040200 | -4.62507600 | -0.55359300 |
| H | -2.47773800 | -3.65636800 | 0.92086800  |
| H | -3.03966100 | -2.92615900 | -0.58698200 |
| O | 2.57674700  | 0.41136500  | -0.61521200 |
| C | 2.74146800  | 1.72721500  | -0.89507400 |
| O | 1.91990600  | 2.58738900  | -0.64148900 |
| C | 4.09981600  | 2.00594000  | -1.53087500 |
| C | 5.04757600  | 2.32013200  | -0.34797800 |
| H | 5.07550400  | 1.48887200  | 0.35931200  |
| H | 6.05559000  | 2.50934100  | -0.73158300 |
| H | 4.70543100  | 3.20508900  | 0.19417500  |
| C | 4.63318400  | 0.79994900  | -2.32132500 |
| H | 3.95419500  | 0.52192800  | -3.13414800 |
| H | 5.59903200  | 1.05890100  | -2.76630900 |
| H | 4.77643400  | -0.07022800 | -1.67768700 |
| C | 3.97153300  | 3.23116500  | -2.44840500 |
| H | 3.31566600  | 3.02181400  | -3.30021200 |
| H | 3.55699100  | 4.08144500  | -1.90425600 |
| H | 4.95657900  | 3.50585700  | -2.83791700 |
| C | -0.86165600 | 0.36992600  | -1.27920800 |
| C | -1.63076100 | 0.13861400  | -0.32034700 |
| C | -2.83193100 | 0.51507500  | 0.48125900  |
| O | -2.50306600 | 1.30007000  | 1.59568700  |
| H | -1.68788900 | 1.81677000  | 1.39342800  |
| C | -0.36937800 | 1.03620900  | -2.49029600 |
| H | -1.18067600 | 1.64348400  | -2.90815100 |

|   |             |             |             |
|---|-------------|-------------|-------------|
| H | 0.46390100  | 1.69842000  | -2.24674500 |
| H | -0.03877400 | 0.32119100  | -3.24831900 |
| H | -3.32823500 | -0.39086300 | 0.85205800  |
| C | -3.76346000 | 1.22258500  | -0.50047000 |
| C | -4.79260000 | 0.52674200  | -1.13708100 |
| C | -3.53321700 | 2.56456700  | -0.82408500 |
| C | -5.58851300 | 1.16049600  | -2.09331000 |
| H | -4.97548000 | -0.51424200 | -0.87867100 |
| C | -4.32657100 | 3.19701000  | -1.77984000 |
| H | -2.73260200 | 3.09938700  | -0.32198300 |
| C | -5.35453400 | 2.49712300  | -2.41833000 |
| H | -6.39226800 | 0.61394400  | -2.57838800 |
| H | -4.14566200 | 4.23935400  | -2.02644000 |
| H | -5.97298100 | 2.99350900  | -3.16032100 |
| C | -0.66896800 | 3.56156300  | 3.27904400  |
| C | 0.29528300  | 3.50920700  | 2.10643300  |
| H | -1.60580800 | 4.04659100  | 2.98699900  |
| H | -0.90009000 | 2.55286500  | 3.63188000  |
| H | -0.22964100 | 4.12840500  | 4.10634300  |
| H | 1.21690800  | 2.98684500  | 2.38579800  |
| H | 0.56844700  | 4.52568400  | 1.78767700  |
| O | -0.33881400 | 2.82338400  | 1.01889400  |
| H | 0.35706200  | 2.53962500  | 0.39625300  |

**TS-a1s**

|    |             |             |             |
|----|-------------|-------------|-------------|
| N  | 1.16127300  | 0.82332800  | 0.46743100  |
| C  | -0.03205500 | 0.17179700  | 2.34002000  |
| C  | -0.31864600 | 0.26143900  | 3.70017000  |
| H  | -0.08622500 | 1.19092200  | 4.21076200  |
| C  | -0.86276200 | -0.83385400 | 4.37081500  |
| H  | -1.09279600 | -0.76585600 | 5.42963300  |
| C  | -1.09949200 | -2.02518800 | 3.67815300  |
| H  | -1.51225000 | -2.88416600 | 4.19987800  |
| C  | -0.82938900 | -2.11169700 | 2.31294300  |
| H  | -1.06370500 | -3.02583300 | 1.77573400  |
| C  | -0.30792400 | -1.01024700 | 1.61792700  |
| C  | 2.69648900  | -1.58158200 | -1.40306100 |
| C  | 3.11445100  | -1.69693800 | -0.00469300 |
| C  | 2.40041600  | -2.76633100 | 0.59001500  |
| C  | 1.49064400  | -3.29272400 | -0.40952800 |
| C  | 1.73357200  | -2.60614200 | -1.64861700 |
| Rh | 0.95253000  | -1.14292000 | -0.12167300 |
| C  | 0.69622700  | 1.28021700  | 1.65367700  |
| O  | 0.86376600  | 2.41558300  | 2.11926100  |

|   |             |             |             |
|---|-------------|-------------|-------------|
| C | 1.08013100  | -2.93800300 | -2.95428500 |
| H | 1.51322800  | -3.85180300 | -3.37876300 |
| H | 0.00618700  | -3.10508100 | -2.83304100 |
| H | 1.21597400  | -2.13892000 | -3.68558400 |
| C | 3.28088900  | -0.62545300 | -2.39594600 |
| H | 4.23480300  | -0.99469200 | -2.79347100 |
| H | 2.60330400  | -0.46900100 | -3.23880800 |
| H | 3.46002400  | 0.34614200  | -1.93171400 |
| C | 4.14377400  | -0.82165800 | 0.63988800  |
| H | 5.15366300  | -1.12979900 | 0.34300200  |
| H | 4.00577400  | 0.22075900  | 0.34490600  |
| H | 4.08087300  | -0.86835200 | 1.72858700  |
| C | 2.51293900  | -3.26043200 | 1.99817500  |
| H | 3.02645700  | -4.22870300 | 2.03465600  |
| H | 3.07345100  | -2.55923400 | 2.61933100  |
| H | 1.52639500  | -3.38284400 | 2.45417200  |
| C | 0.59490200  | -4.48075600 | -0.23769000 |
| H | 1.09616900  | -5.39918200 | -0.56933700 |
| H | 0.31756400  | -4.61784600 | 0.80930600  |
| H | -0.32307400 | -4.37628500 | -0.82217600 |
| O | 1.93886700  | 1.77694200  | -0.23701100 |
| C | 1.24882500  | 2.81672400  | -0.75880700 |
| O | 0.03555900  | 2.87685300  | -0.82619700 |
| C | 2.17840300  | 3.94299900  | -1.20145000 |
| C | 2.26311900  | 4.89048000  | 0.02023200  |
| H | 2.62883500  | 4.35753200  | 0.90086900  |
| H | 2.93877100  | 5.72144600  | -0.20769500 |
| H | 1.27691900  | 5.29535300  | 0.26119400  |
| C | 3.58196700  | 3.43779400  | -1.57116400 |
| H | 3.54315600  | 2.72142600  | -2.39814900 |
| H | 4.19845000  | 4.28422600  | -1.88991500 |
| H | 4.07174800  | 2.95717900  | -0.72211400 |
| C | 1.53899600  | 4.66977600  | -2.39403700 |
| H | 1.48719500  | 4.01771400  | -3.27242300 |
| H | 0.52490000  | 4.99295800  | -2.15279500 |
| H | 2.13744800  | 5.54730600  | -2.65746900 |
| C | -0.70599600 | -0.46544800 | -1.10788700 |
| C | -1.37549600 | -0.75291600 | -0.05098600 |
| C | -2.80694600 | -0.90364800 | 0.42857100  |
| O | -3.11843400 | -0.06131900 | 1.49780700  |
| H | -2.74771000 | 0.82994000  | 1.29869400  |
| C | -0.85771200 | 0.09279000  | -2.47048000 |
| H | -1.89937500 | 0.03925800  | -2.80167700 |
| H | -0.55616300 | 1.14486600  | -2.45161600 |

|   |             |             |             |
|---|-------------|-------------|-------------|
| H | -0.22438400 | -0.43027700 | -3.19121700 |
| H | -2.94791200 | -1.93065500 | 0.78364800  |
| C | -3.68356000 | -0.69829300 | -0.80465200 |
| C | -3.99179300 | -1.78845400 | -1.62399700 |
| C | -4.13008300 | 0.57769200  | -1.16192800 |
| C | -4.73649100 | -1.61209600 | -2.78979700 |
| H | -3.64520400 | -2.78107600 | -1.34470700 |
| C | -4.87473400 | 0.75420300  | -2.32894100 |
| H | -3.87622300 | 1.42725100  | -0.53722600 |
| C | -5.17910500 | -0.33626500 | -3.14612500 |
| H | -4.97563000 | -2.46725900 | -3.41547000 |
| H | -5.21604200 | 1.74859600  | -2.60198100 |
| H | -5.76046100 | -0.19450100 | -4.05242600 |
| C | -3.08098200 | 3.01845200  | 2.92574100  |
| C | -2.13130300 | 3.40427100  | 1.80396000  |
| H | -4.09747300 | 2.87423400  | 2.54570500  |
| H | -2.75753800 | 2.08481600  | 3.39521500  |
| H | -3.10537400 | 3.80206500  | 3.68983700  |
| H | -1.10932600 | 3.49990700  | 2.18159100  |
| H | -2.43508000 | 4.36264800  | 1.35748700  |
| O | -2.17145200 | 2.37859000  | 0.80257400  |
| H | -1.37619000 | 2.44668400  | 0.24005600  |

### II-a1s

|    |             |             |             |
|----|-------------|-------------|-------------|
| N  | 0.64867900  | 1.04459700  | 0.40889200  |
| C  | 0.34835800  | -0.41132000 | 2.20498800  |
| C  | 1.11493800  | -0.68272300 | 3.35499300  |
| H  | 1.58299100  | 0.15737700  | 3.85650200  |
| C  | 1.25714300  | -1.97466500 | 3.83599200  |
| H  | 1.85284700  | -2.16147500 | 4.72440400  |
| C  | 0.62145100  | -3.03825900 | 3.17567200  |
| H  | 0.72579400  | -4.05295800 | 3.54833500  |
| C  | -0.16146900 | -2.78472100 | 2.06219100  |
| H  | -0.68265500 | -3.59926300 | 1.56843200  |
| C  | -0.33312800 | -1.47787800 | 1.54373500  |
| C  | 2.55633100  | -0.59709700 | -1.94440600 |
| C  | 3.45955900  | -0.44796600 | -0.79027300 |
| C  | 3.41963700  | -1.63780300 | -0.05909800 |
| C  | 2.51355400  | -2.56678800 | -0.74932900 |
| C  | 2.08450900  | -1.96629200 | -1.96336700 |
| Rh | 1.24006400  | -0.81128900 | -0.28547500 |
| C  | 0.40203600  | 1.03754000  | 1.73529800  |
| O  | 0.35303600  | 1.99632200  | 2.50688300  |
| C  | 1.32722000  | -2.64009200 | -3.06407200 |

|   |             |             |             |
|---|-------------|-------------|-------------|
| H | 2.00177900  | -3.27227200 | -3.65447800 |
| H | 0.52751900  | -3.27444400 | -2.67391700 |
| H | 0.87870800  | -1.91363700 | -3.74312500 |
| C | 2.38612700  | 0.42192300  | -3.02636600 |
| H | 3.21057500  | 0.37353200  | -3.74949800 |
| H | 1.44935600  | 0.27089500  | -3.56707000 |
| H | 2.36882900  | 1.42913300  | -2.60346400 |
| C | 4.20138600  | 0.81125400  | -0.46883200 |
| H | 5.00893900  | 0.98162400  | -1.19100700 |
| H | 3.53236000  | 1.67404600  | -0.50277900 |
| H | 4.64326800  | 0.77114000  | 0.52871000  |
| C | 4.08916300  | -1.94964700 | 1.24152600  |
| H | 4.82100200  | -2.75731600 | 1.12091100  |
| H | 4.60994200  | -1.07836600 | 1.64302900  |
| H | 3.35917400  | -2.27466100 | 1.99057700  |
| C | 2.25465600  | -3.97392000 | -0.31010100 |
| H | 3.09914400  | -4.62402200 | -0.57218600 |
| H | 2.11409700  | -4.02645000 | 0.77224300  |
| H | 1.35819500  | -4.37745100 | -0.78590900 |
| O | 1.14414600  | 2.29412800  | -0.05841400 |
| C | 0.23051500  | 3.09759200  | -0.64219000 |
| O | -0.92139600 | 2.78201000  | -0.87004400 |
| C | 0.80737200  | 4.48779500  | -0.90317400 |
| C | 0.57338900  | 5.27025800  | 0.41285800  |
| H | 1.03835400  | 4.75728500  | 1.25883300  |
| H | 1.00044800  | 6.27426500  | 0.32352000  |
| H | -0.49630100 | 5.36641600  | 0.61901800  |
| C | 2.31068400  | 4.44391500  | -1.22242600 |
| H | 2.51281500  | 3.83766200  | -2.11178200 |
| H | 2.66757200  | 5.45905400  | -1.42287400 |
| H | 2.88635600  | 4.03748400  | -0.38883600 |
| C | 0.03159800  | 5.14013300  | -2.05593800 |
| H | 0.20229900  | 4.60873100  | -2.99776400 |
| H | -1.04116800 | 5.13332000  | -1.85566300 |
| H | 0.36198300  | 6.17548400  | -2.18374700 |
| C | -0.74427500 | -0.89634100 | -0.73010900 |
| C | -1.31984000 | -1.28242100 | 0.41382100  |
| C | -2.77276300 | -1.54214700 | 0.82470200  |
| O | -3.12452400 | -0.69230700 | 1.89505100  |
| H | -2.92598000 | 0.23165300  | 1.62159800  |
| C | -1.28649000 | -0.44892200 | -2.04482100 |
| H | -2.37516000 | -0.48744200 | -2.09316100 |
| H | -0.97717700 | 0.58863900  | -2.21130600 |
| H | -0.88829200 | -1.05197900 | -2.86646700 |

|   |             |             |             |
|---|-------------|-------------|-------------|
| H | -2.80117200 | -2.55788700 | 1.24605500  |
| C | -3.75339000 | -1.52016700 | -0.33395100 |
| C | -3.83951000 | -2.63038700 | -1.18142600 |
| C | -4.55330700 | -0.40367900 | -0.59148100 |
| C | -4.68883500 | -2.61990700 | -2.28618700 |
| H | -3.22490200 | -3.50431000 | -0.97643100 |
| C | -5.40440700 | -0.39128600 | -1.69803700 |
| H | -4.48511800 | 0.46012400  | 0.05972400  |
| C | -5.47259400 | -1.49417100 | -2.55076200 |
| H | -4.74374500 | -3.48786500 | -2.93739000 |
| H | -6.01555600 | 0.48500000  | -1.89512000 |
| H | -6.13609300 | -1.48087500 | -3.41057300 |
| C | -2.94607200 | 2.45422500  | 3.32777700  |
| C | -2.60937500 | 2.93853700  | 1.92821500  |
| H | -3.92075600 | 1.95615500  | 3.34228000  |
| H | -2.18416700 | 1.74838700  | 3.66745000  |
| H | -2.97590500 | 3.29684200  | 4.02635200  |
| H | -1.59464200 | 3.34761500  | 1.92019100  |
| H | -3.30933100 | 3.72536200  | 1.60868500  |
| O | -2.69304800 | 1.83315200  | 1.02309500  |
| H | -2.07061500 | 1.97742300  | 0.28674900  |

**I-a2s**

|    |             |             |             |
|----|-------------|-------------|-------------|
| N  | 1.80668400  | 0.44381200  | 0.58866600  |
| C  | 1.28074400  | -0.78449600 | 2.48021000  |
| C  | 1.29134000  | -1.06858000 | 3.84786900  |
| H  | 1.81281400  | -0.38328100 | 4.50941200  |
| C  | 0.62887900  | -2.19994500 | 4.32142400  |
| H  | 0.62435100  | -2.42800600 | 5.38282200  |
| C  | -0.04253400 | -3.03281800 | 3.42212900  |
| H  | -0.57000500 | -3.91075000 | 3.78569500  |
| C  | -0.05407600 | -2.74050000 | 2.05309600  |
| H  | -0.59926300 | -3.39647200 | 1.38053100  |
| C  | 0.61313000  | -1.61255600 | 1.56420700  |
| C  | 2.00306700  | -1.20763700 | -2.33958500 |
| C  | 2.65939100  | -1.94097700 | -1.27672900 |
| C  | 1.80978100  | -3.02720200 | -0.88646100 |
| C  | 0.58797000  | -2.92387100 | -1.63519400 |
| C  | 0.73740800  | -1.82110000 | -2.56023100 |
| Rh | 0.80603800  | -1.05376100 | -0.40498800 |
| C  | 1.94076300  | 0.44270500  | 1.94658700  |
| O  | 2.49570500  | 1.30497900  | 2.62679000  |
| C  | -0.28467500 | -1.45564300 | -3.59001300 |
| H  | -0.36111400 | -2.24823200 | -4.34327300 |



|   |             |             |             |
|---|-------------|-------------|-------------|
| H | -1.27312100 | -1.33304800 | -3.13839000 |
| H | -0.02904000 | -0.52745000 | -4.10264900 |
| C | 2.60126700  | -0.04530300 | -3.07137400 |
| H | 3.40839800  | -0.37368300 | -3.73698500 |
| H | 1.85629100  | 0.46956900  | -3.68129000 |
| H | 3.01628400  | 0.68258300  | -2.36982400 |
| C | 4.02539800  | -1.64393100 | -0.74496800 |
| H | 4.79611800  | -2.10319700 | -1.37606500 |
| H | 4.20192100  | -0.56709800 | -0.71414700 |
| H | 4.14589500  | -2.02588000 | 0.27050500  |
| C | 2.17893600  | -4.10974300 | 0.07693500  |
| H | 2.74853200  | -4.88986600 | -0.44275300 |
| H | 2.79465800  | -3.72545300 | 0.89219300  |
| H | 1.29867200  | -4.57422400 | 0.52165200  |
| C | -0.56575600 | -3.87946500 | -1.61825500 |
| H | -0.47988600 | -4.62149600 | -2.42212200 |
| H | -0.61671500 | -4.42445300 | -0.67330700 |
| H | -1.51579100 | -3.35506900 | -1.75196700 |
| O | 2.25761600  | 1.63599300  | -0.02349000 |
| C | 1.55495300  | 2.75415900  | 0.32934000  |
| O | 0.51169900  | 2.71549800  | 0.94373000  |
| C | 2.27883800  | 4.01743300  | -0.12680400 |
| C | 1.35991000  | 5.22497600  | 0.10429800  |
| H | 1.09292400  | 5.31474200  | 1.15981400  |
| H | 1.87624700  | 6.14017500  | -0.20124200 |
| H | 0.43210500  | 5.14363500  | -0.46861900 |
| C | 3.55299400  | 4.13849200  | 0.73984700  |
| H | 4.22998600  | 3.30125300  | 0.55771700  |
| H | 4.06994800  | 5.07342300  | 0.49938600  |
| H | 3.30122400  | 4.13664700  | 1.80317700  |
| C | 2.66102500  | 3.91630600  | -1.61593400 |
| H | 3.32467300  | 3.06892000  | -1.80155000 |
| H | 1.77306300  | 3.81019700  | -2.24773000 |
| H | 3.17976200  | 4.83049500  | -1.92124800 |
| C | -0.72500500 | 0.44400500  | -0.91934600 |
| C | -1.26851200 | -0.35556500 | -0.13293800 |
| C | -2.32300600 | -0.82024400 | 0.80498200  |
| O | -2.18369600 | -0.18364400 | 2.06567600  |
| H | -1.27993600 | -0.35140600 | 2.37232800  |
| C | -0.54861700 | 1.56161200  | -1.85578200 |
| H | -1.00240300 | 1.31640600  | -2.82177900 |
| H | -1.04233100 | 2.45193500  | -1.44485500 |
| H | 0.50630800  | 1.78362000  | -2.02069600 |
| H | -2.22470500 | -1.90802100 | 0.92943000  |

|   |             |             |             |
|---|-------------|-------------|-------------|
| C | -3.71904500 | -0.53995100 | 0.26620400  |
| C | -4.01490500 | -0.72377200 | -1.08832000 |
| C | -4.73773200 | -0.15489200 | 1.14193800  |
| C | -5.30983500 | -0.52276500 | -1.56396700 |
| H | -3.22380600 | -1.01194900 | -1.77397900 |
| C | -6.03366300 | 0.04634300  | 0.66492800  |
| H | -4.50154100 | -0.00590100 | 2.18823100  |
| C | -6.32467600 | -0.13563700 | -0.68745300 |
| H | -5.52443200 | -0.66159200 | -2.61955600 |
| H | -6.81659300 | 0.35128700  | 1.35312600  |
| H | -7.33269800 | 0.02639700  | -1.05699600 |
| C | -4.02470900 | 3.02672300  | -0.52501500 |
| C | -2.96752800 | 3.20313500  | 0.55233000  |
| H | -4.25841400 | 3.98997500  | -0.98977600 |
| H | -3.67299700 | 2.34404600  | -1.30415500 |
| H | -4.94109300 | 2.60642800  | -0.10268900 |
| H | -2.69840700 | 2.23054800  | 0.98349000  |
| H | -3.36938600 | 3.82264700  | 1.37047500  |
| O | -1.82549400 | 3.83467500  | -0.02668100 |
| H | -1.05075300 | 3.60836800  | 0.51555500  |

**TS-a2<sub>s</sub>**

|    |            |             |             |
|----|------------|-------------|-------------|
| N  | 0.85478400 | 1.22817100  | 0.94523300  |
| C  | 1.35254100 | -0.48582300 | 2.41461100  |
| C  | 1.83505600 | -0.93400900 | 3.64501800  |
| H  | 1.73958600 | -0.27163500 | 4.49993200  |
| C  | 2.43682600 | -2.19023200 | 3.74189600  |
| H  | 2.81038600 | -2.54341000 | 4.69789000  |
| C  | 2.56698800 | -2.98936600 | 2.60024800  |
| H  | 3.04570300 | -3.96200000 | 2.67060900  |
| C  | 2.06372200 | -2.55447000 | 1.37414500  |
| H  | 2.12380000 | -3.20243700 | 0.50504300  |
| C  | 1.43489800 | -1.30211500 | 1.26358500  |
| C  | 2.14163900 | 1.12047000  | -2.20802100 |
| C  | 3.20520700 | 1.04805500  | -1.20641400 |
| C  | 3.62632800 | -0.30013400 | -1.09711900 |
| C  | 2.79957000 | -1.09084800 | -1.98795400 |
| C  | 1.93935300 | -0.19950600 | -2.71524100 |
| Rh | 1.41700800 | -0.10915600 | -0.52349200 |
| C  | 0.84209800 | 0.91616100  | 2.26639700  |
| O  | 0.52659000 | 1.64449800  | 3.20664900  |
| C  | 1.02633100 | -0.60308300 | -3.83053400 |
| H  | 1.59650200 | -0.74757900 | -4.75632000 |
| H  | 0.51134900 | -1.54150900 | -3.60886700 |

|   |             |             |             |
|---|-------------|-------------|-------------|
| H | 0.26964200  | 0.15905000  | -4.02579100 |
| C | 1.51191700  | 2.38770300  | -2.69689700 |
| H | 2.13611400  | 2.86995500  | -3.46012500 |
| H | 0.52918600  | 2.20190300  | -3.13675800 |
| H | 1.37919300  | 3.09461000  | -1.87555300 |
| C | 3.74038000  | 2.22942700  | -0.45969500 |
| H | 4.41761700  | 2.81174600  | -1.09618300 |
| H | 2.92840600  | 2.88340500  | -0.13505900 |
| H | 4.29128100  | 1.92165600  | 0.43082000  |
| C | 4.70510700  | -0.84054200 | -0.21181200 |
| H | 5.60000900  | -1.09179000 | -0.79366100 |
| H | 4.99305700  | -0.11250600 | 0.54892900  |
| H | 4.37710400  | -1.74428300 | 0.30941700  |
| C | 2.95092900  | -2.55802000 | -2.25120200 |
| H | 3.59642200  | -2.73352600 | -3.12123400 |
| H | 3.40387400  | -3.06893100 | -1.39901900 |
| H | 1.98614900  | -3.02943700 | -2.45640900 |
| O | 0.42589800  | 2.54659600  | 0.66147800  |
| C | -0.90236300 | 2.76831300  | 0.80545400  |
| O | -1.69370800 | 1.89661500  | 1.10767000  |
| C | -1.27428900 | 4.21412100  | 0.47439400  |
| C | -2.46146900 | 4.62383000  | 1.36507800  |
| H | -2.20290400 | 4.54512600  | 2.42494600  |
| H | -2.73031200 | 5.66307400  | 1.15155100  |
| H | -3.33574000 | 3.99955900  | 1.17235300  |
| C | -0.09122900 | 5.17006900  | 0.69903300  |
| H | 0.74339800  | 4.94465300  | 0.03123300  |
| H | -0.41589700 | 6.19750000  | 0.50564500  |
| H | 0.27415100  | 5.11018100  | 1.72781700  |
| C | -1.70867500 | 4.23664800  | -1.01057200 |
| H | -0.88555300 | 3.93775800  | -1.66673500 |
| H | -2.55943700 | 3.57234200  | -1.18201400 |
| H | -2.00564900 | 5.25473500  | -1.28271400 |
| C | -0.55939400 | -0.64963700 | -0.60566100 |
| C | -0.29170200 | -1.51690700 | 0.30346600  |
| C | -0.89569200 | -2.72138300 | 0.99180100  |
| O | -1.14084500 | -2.49893900 | 2.36320600  |
| H | -0.39713500 | -1.99772300 | 2.72800800  |
| C | -1.67103200 | -0.18991600 | -1.46819600 |
| H | -2.41620300 | -0.98270700 | -1.59153500 |
| H | -2.17018200 | 0.66999200  | -1.01430200 |
| H | -1.31286400 | 0.11536600  | -2.45373600 |
| H | -0.21220400 | -3.57301600 | 0.85810800  |
| C | -2.20618100 | -3.03220400 | 0.29323000  |

|   |             |             |             |
|---|-------------|-------------|-------------|
| C | -2.19176700 | -3.71041800 | -0.92987900 |
| C | -3.42044700 | -2.59497200 | 0.82474100  |
| C | -3.37855200 | -3.93981600 | -1.62338600 |
| H | -1.24422300 | -4.05046900 | -1.34102000 |
| C | -4.61030700 | -2.83215900 | 0.13393700  |
| H | -3.41653400 | -2.07765800 | 1.77651200  |
| C | -4.59302500 | -3.49672500 | -1.09262500 |
| H | -3.35822100 | -4.46606300 | -2.57314700 |
| H | -5.55178700 | -2.49130400 | 0.55351800  |
| H | -5.51948700 | -3.67374500 | -1.63035500 |
| C | -5.67914800 | 0.40111700  | -1.13243600 |
| C | -4.94108400 | 0.86741400  | 0.11230600  |
| H | -6.20758200 | 1.23948100  | -1.59694500 |
| H | -4.97653500 | -0.01029700 | -1.86340200 |
| H | -6.41034000 | -0.37492700 | -0.88382800 |
| H | -4.37316100 | 0.03060900  | 0.53964300  |
| H | -5.66506200 | 1.19589900  | 0.87568500  |
| O | -4.06988500 | 1.93410900  | -0.24054300 |
| H | -3.33433900 | 1.95389300  | 0.39971200  |

#### II-a2s

|    |            |             |             |
|----|------------|-------------|-------------|
| N  | 0.97804700 | 1.42944100  | 0.87497000  |
| C  | 1.36949800 | -0.33809200 | 2.30067700  |
| C  | 2.49280600 | -0.52101100 | 3.12666300  |
| H  | 2.89789500 | 0.34278700  | 3.64409000  |
| C  | 3.05994300 | -1.77687000 | 3.28818500  |
| H  | 3.92783300 | -1.90396500 | 3.92820200  |
| C  | 2.49766000 | -2.88655200 | 2.63618800  |
| H  | 2.93132400 | -3.87311500 | 2.77056900  |
| C  | 1.37835000 | -2.72489200 | 1.83389500  |
| H  | 0.92833000 | -3.58357700 | 1.34404700  |
| C  | 0.78273100 | -1.45640500 | 1.63856100  |
| C  | 2.33885600 | 0.77623200  | -2.17040900 |
| C  | 3.46656500 | 1.01168900  | -1.25376500 |
| C  | 3.93345200 | -0.23331300 | -0.82666100 |
| C  | 3.13813500 | -1.27654000 | -1.49498800 |
| C  | 2.24408200 | -0.65222300 | -2.40395000 |
| Rh | 1.64489500 | -0.08351100 | -0.36099300 |
| C  | 0.79049600 | 1.06382000  | 2.16345300  |
| O  | 0.31694800 | 1.70276300  | 3.09480500  |
| C  | 1.38842300 | -1.32541800 | -3.42977500 |
| H  | 1.94673800 | -1.44554000 | -4.36652200 |
| H  | 1.07001100 | -2.31649600 | -3.09944800 |
| H  | 0.49276700 | -0.74229300 | -3.64813800 |

|   |             |             |             |
|---|-------------|-------------|-------------|
| C | 1.61399500  | 1.85342600  | -2.91233600 |
| H | 2.20177300  | 2.20466400  | -3.77024600 |
| H | 0.65162400  | 1.49765800  | -3.28601800 |
| H | 1.42616700  | 2.70692800  | -2.25683000 |
| C | 3.89924100  | 2.37107900  | -0.80402800 |
| H | 4.31579200  | 2.94464200  | -1.64012600 |
| H | 3.05013600  | 2.93029300  | -0.39952100 |
| H | 4.65904900  | 2.31116100  | -0.02261600 |
| C | 4.99552700  | -0.52860400 | 0.18425400  |
| H | 5.83674000  | -1.05915000 | -0.27714400 |
| H | 5.37960100  | 0.38558400  | 0.64027900  |
| H | 4.60591200  | -1.16293900 | 0.98768800  |
| C | 3.37104900  | -2.74513000 | -1.32571200 |
| H | 4.25772800  | -3.06700600 | -1.88635200 |
| H | 3.53146800  | -2.99487900 | -0.27370000 |
| H | 2.51714500  | -3.32492600 | -1.68232600 |
| O | 0.38834200  | 2.66357300  | 0.48024400  |
| C | -0.95903600 | 2.71602400  | 0.49592800  |
| O | -1.66964700 | 1.78573600  | 0.83418600  |
| C | -1.48743600 | 4.05068100  | -0.02846400 |
| C | -2.75280700 | 4.41569000  | 0.76879600  |
| H | -2.53305100 | 4.51511900  | 1.83573200  |
| H | -3.14480100 | 5.37109700  | 0.40688200  |
| H | -3.52534500 | 3.65682100  | 0.63857000  |
| C | -0.44068100 | 5.16965100  | 0.08774800  |
| H | 0.44481100  | 4.95964800  | -0.51642600 |
| H | -0.87927400 | 6.10944500  | -0.26197300 |
| H | -0.11873300 | 5.30546100  | 1.12389400  |
| C | -1.86205400 | 3.81683400  | -1.51228600 |
| H | -0.98961400 | 3.50510000  | -2.09587900 |
| H | -2.64438800 | 3.05915200  | -1.60309000 |
| H | -2.23738100 | 4.75223300  | -1.93948300 |
| C | -0.28423900 | -0.68333700 | -0.35862600 |
| C | -0.45885400 | -1.34573200 | 0.79278600  |
| C | -1.76765100 | -1.86924400 | 1.35621900  |
| O | -2.50361300 | -0.80950700 | 1.97054200  |
| H | -2.13001300 | 0.02930000  | 1.65552700  |
| C | -1.28783600 | -0.37146000 | -1.42163800 |
| H | -2.30858200 | -0.32187100 | -1.03430900 |
| H | -1.06807500 | 0.59021000  | -1.89526300 |
| H | -1.27227500 | -1.13980500 | -2.20312900 |
| H | -1.51837700 | -2.57566000 | 2.16279800  |
| C | -2.60972800 | -2.63670500 | 0.34236400  |
| C | -2.00908200 | -3.53804000 | -0.54495900 |

|   |             |             |             |
|---|-------------|-------------|-------------|
| C | -3.99943000 | -2.49998900 | 0.32435000  |
| C | -2.77902800 | -4.27351400 | -1.44480100 |
| H | -0.92774600 | -3.64496000 | -0.54274900 |
| C | -4.77285800 | -3.23335600 | -0.57745000 |
| H | -4.46206300 | -1.81057400 | 1.01899900  |
| C | -4.16693800 | -4.11979900 | -1.46779300 |
| H | -2.29614100 | -4.96316200 | -2.13186500 |
| H | -5.85212000 | -3.11032400 | -0.58198000 |
| H | -4.76871100 | -4.68661600 | -2.17207200 |
| C | -6.25328600 | 0.39224900  | -0.40416700 |
| C | -5.14656500 | 1.05507600  | 0.39838800  |
| H | -6.60961700 | 1.06549000  | -1.19027800 |
| H | -5.87739000 | -0.51807700 | -0.87922000 |
| H | -7.10040300 | 0.13268300  | 0.23966600  |
| H | -4.78606100 | 0.38047400  | 1.18573200  |
| H | -5.53389800 | 1.96018300  | 0.89508900  |
| O | -4.08352600 | 1.38464100  | -0.49034300 |
| H | -3.28323100 | 1.52568300  | 0.04346800  |

**I-b1s**

|    |             |             |             |
|----|-------------|-------------|-------------|
| N  | 0.47466000  | 1.22324500  | 0.13208100  |
| C  | 1.86095400  | 0.83453800  | 1.95151600  |
| C  | 2.44767000  | 1.14269800  | 3.18009500  |
| H  | 2.30130000  | 2.13911000  | 3.58606000  |
| C  | 3.19627200  | 0.17381200  | 3.84606700  |
| H  | 3.65436100  | 0.39793900  | 4.80459200  |
| C  | 3.35141700  | -1.09164900 | 3.27217900  |
| H  | 3.93078400  | -1.85329200 | 3.78798400  |
| C  | 2.76394900  | -1.39098700 | 2.03797100  |
| H  | 2.88604400  | -2.38646700 | 1.62105600  |
| C  | 2.01435300  | -0.42623700 | 1.36275700  |
| C  | 1.35986400  | -0.37713800 | -2.74657000 |
| C  | 2.52299800  | 0.15257700  | -2.06441500 |
| C  | 3.19109400  | -0.93174300 | -1.40350900 |
| C  | 2.40834900  | -2.12045500 | -1.60138600 |
| C  | 1.30582800  | -1.77310000 | -2.46660600 |
| Rh | 1.14244500  | -0.62362300 | -0.49476700 |
| C  | 1.06374900  | 1.83922000  | 1.20149200  |
| O  | 0.93240100  | 3.02690700  | 1.50941000  |
| C  | 0.32728300  | -2.75991800 | -3.01991200 |
| H  | 0.84060500  | -3.46517200 | -3.68399600 |
| H  | -0.14671400 | -3.34267700 | -2.22405600 |
| H  | -0.45322200 | -2.26291500 | -3.59810700 |
| C  | 0.41755300  | 0.39233600  | -3.62492500 |

|   |             |             |             |
|---|-------------|-------------|-------------|
| H | 0.47815800  | 0.04330300  | -4.66251100 |
| H | -0.61524600 | 0.30024200  | -3.27921700 |
| H | 0.66826300  | 1.45356700  | -3.61511100 |
| C | 2.98930500  | 1.57487300  | -2.11484100 |
| H | 3.56332700  | 1.76086600  | -3.03073600 |
| H | 2.14316300  | 2.26335500  | -2.09149300 |
| H | 3.63021700  | 1.80997200  | -1.26271600 |
| C | 4.51012800  | -0.84496500 | -0.70471500 |
| H | 5.32333600  | -0.99037300 | -1.42647600 |
| H | 4.64681200  | 0.12780700  | -0.22924900 |
| H | 4.60565300  | -1.60356500 | 0.07261000  |
| C | 2.75419300  | -3.51095200 | -1.16577500 |
| H | 3.27559200  | -4.05815600 | -1.96155900 |
| H | 3.40793900  | -3.50232900 | -0.29107800 |
| H | 1.85464300  | -4.07609700 | -0.90809100 |
| O | -0.02261300 | 2.18473700  | -0.79520700 |
| C | -1.23655600 | 2.66716600  | -0.48656300 |
| O | -1.97220300 | 2.17463100  | 0.35776300  |
| C | -1.59829800 | 3.91209700  | -1.28517700 |
| C | -3.07870100 | 3.80866500  | -1.68989200 |
| H | -3.70997900 | 3.66152700  | -0.81156400 |
| H | -3.38834000 | 4.72742200  | -2.19733900 |
| H | -3.24031500 | 2.96681700  | -2.37097900 |
| C | -1.38548800 | 5.09111700  | -0.30534600 |
| H | -0.35552800 | 5.10880300  | 0.05987400  |
| H | -1.60538100 | 6.03408100  | -0.81626700 |
| H | -2.04839500 | 4.99545200  | 0.55811300  |
| C | -0.71511100 | 4.09641600  | -2.52786500 |
| H | 0.33812300  | 4.20129200  | -2.25853000 |
| H | -0.81512100 | 3.25167900  | -3.21523000 |
| H | -1.02485400 | 5.00258200  | -3.05802800 |
| C | -0.89483700 | -1.36233200 | -0.27484500 |
| C | -0.28586700 | -1.81554500 | 0.71659900  |
| C | -0.19442100 | -2.48824700 | 2.01718000  |
| C | -2.10885600 | -1.21411000 | -1.12422300 |
| H | -1.96075200 | -1.77558400 | -2.05040400 |
| H | 0.66156900  | -3.16364200 | 2.08085000  |
| O | -2.35103600 | 0.11807000  | -1.55105400 |
| H | -2.43993500 | 0.67458100  | -0.75818700 |
| C | -3.30273100 | -1.81576900 | -0.39331200 |
| C | -4.14795800 | -2.69984200 | -1.06957100 |
| C | -3.58764300 | -1.46860000 | 0.93475000  |
| C | -5.27032900 | -3.23387100 | -0.43559500 |
| H | -3.92874100 | -2.96706700 | -2.10048500 |

|   |             |             |             |
|---|-------------|-------------|-------------|
| C | -4.71210800 | -2.00138700 | 1.56433500  |
| H | -2.93265100 | -0.79903600 | 1.48648300  |
| C | -5.55474400 | -2.88384100 | 0.88462600  |
| H | -5.91949900 | -3.92034100 | -0.97126100 |
| H | -4.92687500 | -1.72801200 | 2.59327700  |
| H | -6.42685500 | -3.29796800 | 1.38209000  |
| H | -0.11136800 | -1.73215600 | 2.80059000  |
| H | -1.11825200 | -3.05562700 | 2.17520000  |
| C | -0.87001500 | 0.62011900  | 4.88577300  |
| C | -1.33539300 | 1.36505000  | 3.64528800  |
| H | -1.53815700 | -0.22078300 | 5.09993500  |
| H | 0.14102400  | 0.23000800  | 4.73428600  |
| H | -0.85995700 | 1.28270300  | 5.75761200  |
| H | -0.64363500 | 2.18442700  | 3.41300700  |
| H | -2.32854900 | 1.80898700  | 3.82022200  |
| O | -1.38301000 | 0.44115900  | 2.56299900  |
| H | -1.40896200 | 0.95106400  | 1.73397500  |

**TS-b1<sub>s</sub>**

|    |             |             |             |
|----|-------------|-------------|-------------|
| N  | -0.42785500 | -1.22871800 | 0.37254500  |
| C  | -0.69872000 | -0.25649300 | 2.45980100  |
| C  | -0.93234700 | -0.35160400 | 3.83011900  |
| H  | -0.67720700 | -1.28237200 | 4.32711600  |
| C  | -1.51058400 | 0.71837300  | 4.51537500  |
| H  | -1.69255000 | 0.64666800  | 5.58335900  |
| C  | -1.87176100 | 1.87691000  | 3.81939700  |
| H  | -2.33899900 | 2.70457700  | 4.34586100  |
| C  | -1.61539200 | 1.98219600  | 2.45206700  |
| H  | -1.85108700 | 2.90432200  | 1.92844500  |
| C  | -1.01083500 | 0.92535300  | 1.75308600  |
| C  | -2.39494900 | -0.15858700 | -2.16678200 |
| C  | -3.23716100 | -0.52329200 | -1.02415100 |
| C  | -3.64218800 | 0.66509500  | -0.37123100 |
| C  | -3.02208100 | 1.78067800  | -1.06305300 |
| C  | -2.32350600 | 1.26549400  | -2.20900200 |
| Rh | -1.36180300 | 0.48258800  | -0.33224800 |
| C  | -0.26360800 | -1.46491900 | 1.69622100  |
| O  | 0.13870000  | -2.51584700 | 2.21154600  |
| C  | -1.68297700 | 2.09044400  | -3.28029500 |
| H  | -2.43720400 | 2.41372400  | -4.00857100 |
| H  | -1.21520100 | 2.99059000  | -2.87276900 |
| H  | -0.92358300 | 1.52207800  | -3.82060000 |
| C  | -1.83280700 | -1.11577000 | -3.17146500 |
| H  | -2.54236700 | -1.29034700 | -3.99055300 |



|   |             |             |             |
|---|-------------|-------------|-------------|
| H | -0.89668900 | -0.74215200 | -3.59165100 |
| H | -1.61565900 | -2.07574700 | -2.70127500 |
| C | -3.59562300 | -1.92842900 | -0.65341300 |
| H | -4.39894900 | -2.30484500 | -1.29836200 |
| H | -2.73373800 | -2.58923200 | -0.76300600 |
| H | -3.93361500 | -1.99307100 | 0.38254300  |
| C | -4.52222400 | 0.78209300  | 0.83348700  |
| H | -5.50871900 | 1.17498500  | 0.55954300  |
| H | -4.66813400 | -0.18756500 | 1.31316800  |
| H | -4.08737000 | 1.45300100  | 1.57943700  |
| C | -3.24435400 | 3.22929100  | -0.75432900 |
| H | -4.08762300 | 3.62815700  | -1.33270800 |
| H | -3.47369700 | 3.37619800  | 0.30313600  |
| H | -2.36307300 | 3.82888900  | -0.99668300 |
| O | -0.23558700 | -2.40220700 | -0.40854000 |
| C | 1.04384700  | -2.76978400 | -0.58804700 |
| O | 2.00457000  | -2.06283200 | -0.31729900 |
| C | 1.16999900  | -4.19229700 | -1.11770000 |
| C | 2.40713200  | -4.27216900 | -2.02540200 |
| H | 3.29584700  | -3.91544300 | -1.50198200 |
| H | 2.57076700  | -5.30902900 | -2.33449300 |
| H | 2.27543100  | -3.66343400 | -2.92577700 |
| C | 1.37240100  | -5.06540500 | 0.14591700  |
| H | 0.54246400  | -4.93690600 | 0.84456000  |
| H | 1.44247500  | -6.11775300 | -0.14773100 |
| H | 2.29235400  | -4.78312500 | 0.66423800  |
| C | -0.08413400 | -4.65143100 | -1.87721800 |
| H | -0.96949400 | -4.63442400 | -1.23862000 |
| H | -0.27360700 | -4.01958900 | -2.75040300 |
| H | 0.06474000  | -5.67657200 | -2.23045400 |
| C | 0.52239900  | 1.24552200  | -0.55471500 |
| C | 0.48031500  | 1.66960000  | 0.65390300  |
| C | 1.18618500  | 2.53169600  | 1.63461300  |
| C | 1.40270500  | 1.24800200  | -1.76617600 |
| H | 0.88547000  | 1.81431900  | -2.54573600 |
| H | 0.58630400  | 3.39893700  | 1.92170500  |
| O | 1.55008700  | -0.06087400 | -2.30455800 |
| H | 1.83792300  | -0.64598300 | -1.58187200 |
| C | 2.73755300  | 1.93132100  | -1.51476200 |
| C | 3.10390400  | 3.03025400  | -2.29706700 |
| C | 3.61609100  | 1.47718300  | -0.52148900 |
| C | 4.32798200  | 3.67137600  | -2.10005200 |
| H | 2.42631000  | 3.38400300  | -3.07070600 |
| C | 4.83932900  | 2.11699500  | -0.32633300 |

|   |            |             |             |
|---|------------|-------------|-------------|
| H | 3.34068200 | 0.65521200  | 0.13140100  |
| C | 5.20066100 | 3.21329400  | -1.11333900 |
| H | 4.59852900 | 4.52363200  | -2.71672700 |
| H | 5.50873200 | 1.76028700  | 0.45103900  |
| H | 6.15423800 | 3.70865700  | -0.95545900 |
| H | 1.44276300 | 1.95795900  | 2.52661300  |
| H | 2.10889300 | 2.87497200  | 1.15739900  |
| C | 2.93922800 | -0.19655300 | 4.26211700  |
| C | 2.90932600 | -1.13831900 | 3.06916000  |
| H | 3.61367200 | 0.64485200  | 4.07100200  |
| H | 1.93776500 | 0.20137900  | 4.45367500  |
| H | 3.28369100 | -0.71747200 | 5.16163300  |
| H | 2.19783700 | -1.95314200 | 3.24597800  |
| H | 3.90694300 | -1.58161600 | 2.91556500  |
| O | 2.51219700 | -0.38966400 | 1.92553600  |
| H | 2.24827000 | -1.00831600 | 1.22315100  |

#### **II-b1s**

|    |            |             |             |
|----|------------|-------------|-------------|
| N  | 0.00968000 | 1.05785400  | 0.59449600  |
| C  | 1.02717900 | -0.18413100 | 2.32449200  |
| C  | 2.07796000 | 0.02720300  | 3.24257700  |
| H  | 2.19674000 | 1.02989900  | 3.63761900  |
| C  | 2.91640300 | -1.00269400 | 3.63279500  |
| H  | 3.71836900 | -0.81366500 | 4.33988600  |
| C  | 2.71926600 | -2.29238400 | 3.11330900  |
| H  | 3.37145800 | -3.10806600 | 3.41117100  |
| C  | 1.67326600 | -2.52557600 | 2.23764700  |
| H  | 1.49584100 | -3.52786100 | 1.85973700  |
| C  | 0.78781100 | -1.49865900 | 1.82068800  |
| C  | 2.07361500 | 0.66878400  | -2.11229500 |
| C  | 2.99532600 | 1.19460700  | -1.10034900 |
| C  | 3.66608000 | 0.10277700  | -0.53547100 |
| C  | 3.20594500 | -1.12463800 | -1.19960000 |
| C  | 2.30817600 | -0.75541400 | -2.24027300 |
| Rh | 1.38776300 | -0.24976400 | -0.31099800 |
| C  | 0.29201000 | 1.08847600  | 1.92969100  |
| O  | 0.11681400 | 2.01458800  | 2.71554100  |
| C  | 1.76523900 | -1.62585400 | -3.32643400 |
| H  | 2.41544600 | -1.55991400 | -4.20815400 |
| H  | 1.72781700 | -2.67420900 | -3.02241800 |
| H  | 0.76323400 | -1.30680500 | -3.61554500 |
| C  | 1.22741000 | 1.50718300  | -3.01318000 |
| H  | 1.80919900 | 1.85457300  | -3.87696300 |
| H  | 0.36492400 | 0.94021300  | -3.36398100 |

|   |             |             |             |
|---|-------------|-------------|-------------|
| H | 0.86596800  | 2.38723200  | -2.47804400 |
| C | 3.10066000  | 2.64027900  | -0.72571300 |
| H | 3.55848000  | 3.22092800  | -1.53533600 |
| H | 2.11269600  | 3.06242500  | -0.52750400 |
| H | 3.70683800  | 2.77695400  | 0.17192900  |
| C | 4.65066200  | 0.10818800  | 0.58843900  |
| H | 5.63299200  | -0.23084000 | 0.23865700  |
| H | 4.76744400  | 1.10414900  | 1.01903000  |
| H | 4.33463000  | -0.56662400 | 1.39011400  |
| C | 3.74332000  | -2.49129000 | -0.91026000 |
| H | 4.73193000  | -2.63146100 | -1.36566200 |
| H | 3.84512700  | -2.64805600 | 0.16688300  |
| H | 3.07912200  | -3.26569000 | -1.29965200 |
| O | -0.23481000 | 2.39225200  | 0.13007100  |
| C | -1.39388300 | 2.55276400  | -0.53386900 |
| O | -2.12392800 | 1.63680500  | -0.86764300 |
| C | -1.69837200 | 4.03550500  | -0.74882700 |
| C | -2.85188900 | 4.16491900  | -1.75110100 |
| H | -3.73148200 | 3.61619700  | -1.40887200 |
| H | -3.11849700 | 5.21950200  | -1.87021200 |
| H | -2.57126800 | 3.76727200  | -2.73092500 |
| C | -2.11174000 | 4.60140600  | 0.63078400  |
| H | -1.32503700 | 4.43913800  | 1.37156700  |
| H | -2.30315600 | 5.67542900  | 0.54051300  |
| H | -3.02549000 | 4.12077100  | 0.99100000  |
| C | -0.45574100 | 4.78786400  | -1.25999100 |
| H | 0.36888900  | 4.72824900  | -0.54700000 |
| H | -0.11637900 | 4.39247800  | -2.22287900 |
| H | -0.70760800 | 5.84309600  | -1.40481100 |
| C | -0.25584600 | -1.47770100 | -0.31245900 |
| C | -0.36914800 | -1.93163000 | 0.94249300  |
| C | -1.38961400 | -2.83410800 | 1.60287900  |
| C | -1.07490100 | -1.73716000 | -1.55560400 |
| H | -0.50480000 | -2.44306600 | -2.17074700 |
| H | -0.90343100 | -3.46420700 | 2.35529200  |
| O | -1.18233000 | -0.56170400 | -2.35992700 |
| H | -1.50763700 | 0.15777100  | -1.78782900 |
| C | -2.43462900 | -2.36563300 | -1.30984300 |
| C | -2.65647000 | -3.70036500 | -1.66019400 |
| C | -3.47095800 | -1.63723400 | -0.71471300 |
| C | -3.88410700 | -4.31253100 | -1.40135400 |
| H | -1.85637900 | -4.26813000 | -2.12984000 |
| C | -4.69638100 | -2.24598500 | -0.45546500 |
| H | -3.31370000 | -0.60773000 | -0.41864900 |

|   |             |             |             |
|---|-------------|-------------|-------------|
| C | -4.90739300 | -3.58505100 | -0.79340500 |
| H | -4.04056100 | -5.35187700 | -1.67585100 |
| H | -5.48618300 | -1.67464700 | 0.02326100  |
| H | -5.86318700 | -4.05695300 | -0.58509200 |
| H | -2.13471200 | -2.21339700 | 2.11182300  |
| H | -1.90636200 | -3.47563200 | 0.89152700  |
| C | -4.03302200 | 1.08613600  | 3.50381900  |
| C | -3.17415700 | 1.34619700  | 2.27813500  |
| H | -4.81679000 | 0.35750300  | 3.27368300  |
| H | -3.41990600 | 0.68392900  | 4.31579800  |
| H | -4.50671800 | 2.01064400  | 3.84989700  |
| H | -2.37902100 | 2.06341100  | 2.52084000  |
| H | -3.78926800 | 1.78006100  | 1.47331500  |
| O | -2.61564800 | 0.10641400  | 1.86233100  |
| H | -1.96991900 | 0.27909100  | 1.15879600  |

**I-b2<sub>s</sub>**

|    |             |             |             |
|----|-------------|-------------|-------------|
| N  | 0.28965500  | 0.88760700  | 0.75099200  |
| C  | 1.92741700  | 0.48411100  | 2.36107600  |
| C  | 2.48536300  | 0.59044500  | 3.63721800  |
| H  | 2.05784900  | 1.31057400  | 4.32852800  |
| C  | 3.57257400  | -0.20978500 | 3.98042800  |
| H  | 4.01458500  | -0.14108700 | 4.96985600  |
| C  | 4.09537900  | -1.10030100 | 3.03776100  |
| H  | 4.94564800  | -1.72654300 | 3.29663600  |
| C  | 3.53547700  | -1.19472300 | 1.75914100  |
| H  | 3.96202300  | -1.89849700 | 1.05061100  |
| C  | 2.44146600  | -0.40049300 | 1.40450600  |
| C  | 1.47916400  | 0.91521700  | -2.38225700 |
| C  | 2.56471900  | 1.33968000  | -1.51275600 |
| C  | 3.49876100  | 0.25278400  | -1.40989400 |
| C  | 2.93615700  | -0.87595000 | -2.08977700 |
| C  | 1.70171900  | -0.44100300 | -2.72037400 |
| Rh | 1.53136200  | -0.28674300 | -0.43839600 |
| C  | 0.81302500  | 1.36738700  | 1.92775800  |
| O  | 0.42948800  | 2.37080700  | 2.52939500  |
| C  | 0.83275600  | -1.27944600 | -3.60393400 |
| H  | 1.19308600  | -1.24578900 | -4.63965100 |
| H  | 0.84013800  | -2.32506100 | -3.28590100 |
| H  | -0.19854300 | -0.92301200 | -3.58357700 |
| C  | 0.36041700  | 1.77136700  | -2.88180300 |
| H  | 0.53335400  | 2.04714500  | -3.92961000 |
| H  | -0.59333700 | 1.24556100  | -2.80667600 |
| H  | 0.28770500  | 2.68709000  | -2.29689900 |

|   |             |             |             |
|---|-------------|-------------|-------------|
| C | 2.73744000  | 2.70996800  | -0.93360700 |
| H | 3.19563700  | 3.39274200  | -1.65948500 |
| H | 1.77467700  | 3.12526400  | -0.62919000 |
| H | 3.37494100  | 2.67815500  | -0.04746000 |
| C | 4.84535100  | 0.32560600  | -0.76446800 |
| H | 5.56602100  | 0.75899600  | -1.46893500 |
| H | 4.82917900  | 0.94671000  | 0.13243500  |
| H | 5.21135800  | -0.66055100 | -0.47603600 |
| C | 3.57135400  | -2.21993200 | -2.26965600 |
| H | 4.13090200  | -2.27169000 | -3.21197600 |
| H | 4.26852300  | -2.44156000 | -1.45815700 |
| H | 2.81658300  | -3.01039800 | -2.28959300 |
| O | -0.47345400 | 1.92017500  | 0.11617100  |
| C | -1.68750300 | 2.14319200  | 0.66056500  |
| O | -2.24616100 | 1.37384400  | 1.42180500  |
| C | -2.27416100 | 3.47744200  | 0.18722000  |
| C | -3.51846000 | 3.78012700  | 1.03564200  |
| H | -3.27083100 | 3.82129700  | 2.09920400  |
| H | -3.93614000 | 4.74606500  | 0.73499200  |
| H | -4.28536900 | 3.01551900  | 0.89263900  |
| C | -1.21900100 | 4.58525800  | 0.38122500  |
| H | -0.37401900 | 4.44680100  | -0.29705400 |
| H | -1.67097800 | 5.56097500  | 0.17406100  |
| H | -0.83007100 | 4.57835400  | 1.40228900  |
| C | -2.67872200 | 3.37026000  | -1.29811000 |
| H | -1.81423800 | 3.17105000  | -1.93269000 |
| H | -3.40929500 | 2.57099100  | -1.44352900 |
| H | -3.12581500 | 4.31770800  | -1.61759600 |
| C | -0.06340100 | -1.75496500 | -0.45915700 |
| C | 0.87313500  | -2.33635300 | 0.12548300  |
| C | 1.54118900  | -3.43320900 | 0.83866100  |
| C | -1.44744700 | -1.74379200 | -1.02244400 |
| H | -1.43864200 | -2.47471000 | -1.84599300 |
| H | 2.49549600  | -3.69884000 | 0.37303200  |
| O | -1.81567500 | -0.48980500 | -1.56061600 |
| H | -2.64867000 | -0.17942100 | -1.13927700 |
| C | -2.39896800 | -2.26998200 | 0.04200500  |
| C | -3.28295500 | -3.30826300 | -0.26057800 |
| C | -2.39230900 | -1.71931800 | 1.33065000  |
| C | -4.15870000 | -3.79840200 | 0.71150400  |
| H | -3.28478100 | -3.73668000 | -1.25971400 |
| C | -3.27302000 | -2.20188900 | 2.29623000  |
| H | -1.71294300 | -0.90504800 | 1.55944800  |
| C | -4.15391800 | -3.24542500 | 1.99209600  |

|   |             |             |             |
|---|-------------|-------------|-------------|
| H | -4.83942400 | -4.60876200 | 0.46801500  |
| H | -3.26845500 | -1.76467800 | 3.29015400  |
| H | -4.83229600 | -3.62438300 | 2.75085600  |
| H | 1.74328400  | -3.16401800 | 1.87762400  |
| H | 0.89162100  | -4.31528100 | 0.82240200  |
| C | -5.64390100 | -0.80817800 | -1.62450600 |
| C | -5.26707200 | -0.29568600 | -0.24634000 |
| H | -5.84196400 | 0.02489300  | -2.30573400 |
| H | -4.82608400 | -1.40445000 | -2.03899200 |
| H | -6.53873200 | -1.43571900 | -1.57010500 |
| H | -5.08152400 | -1.13256200 | 0.43462300  |
| H | -6.08198800 | 0.31089600  | 0.17387000  |
| O | -4.09065400 | 0.50523500  | -0.38129600 |
| H | -3.71564100 | 0.72559900  | 0.49269800  |

**TS-b2s**

|    |             |             |             |
|----|-------------|-------------|-------------|
| N  | 0.53086000  | 1.13339400  | 0.71528900  |
| C  | 1.99324800  | 0.30628000  | 2.31969000  |
| C  | 2.79546200  | 0.45779600  | 3.44954700  |
| H  | 2.57774000  | 1.28285400  | 4.12085900  |
| C  | 3.86174200  | -0.41604900 | 3.67034500  |
| H  | 4.48885200  | -0.29891100 | 4.54901300  |
| C  | 4.12982800  | -1.43507400 | 2.75020400  |
| H  | 4.96693500  | -2.10860000 | 2.91280800  |
| C  | 3.31344500  | -1.60256000 | 1.63038500  |
| H  | 3.49721400  | -2.42487100 | 0.94499600  |
| C  | 2.23129200  | -0.73893200 | 1.40371100  |
| C  | 1.35656400  | 0.63111100  | -2.56101600 |
| C  | 2.46973300  | 1.25633700  | -1.84702100 |
| C  | 3.43278100  | 0.25784100  | -1.55661500 |
| C  | 2.91462100  | -1.00679600 | -2.04540700 |
| C  | 1.66938900  | -0.75354400 | -2.71664900 |
| Rh | 1.45178100  | -0.24176100 | -0.54076600 |
| C  | 0.96627200  | 1.34304800  | 1.98435000  |
| O  | 0.62085600  | 2.25110200  | 2.74503000  |
| C  | 0.86454800  | -1.75556300 | -3.48469800 |
| H  | 1.17440100  | -1.75877500 | -4.53741500 |
| H  | 1.01321400  | -2.76683700 | -3.09735400 |
| H  | -0.19889100 | -1.51929900 | -3.43525700 |
| C  | 0.17864400  | 1.34736500  | -3.14156400 |
| H  | 0.39320000  | 1.69340100  | -4.16125000 |
| H  | -0.69210200 | 0.69086200  | -3.16313400 |
| H  | -0.07861000 | 2.21769100  | -2.53672200 |
| C  | 2.54796400  | 2.71391200  | -1.51603900 |

|   |             |             |             |
|---|-------------|-------------|-------------|
| H | 2.84844000  | 3.29207500  | -2.39835300 |
| H | 1.57905700  | 3.08496600  | -1.17707600 |
| H | 3.27266900  | 2.90454700  | -0.72226700 |
| C | 4.74241300  | 0.44228000  | -0.85659900 |
| H | 5.57479900  | 0.40458200  | -1.56970000 |
| H | 4.78344200  | 1.40464400  | -0.34282300 |
| H | 4.90485600  | -0.33555800 | -0.10571400 |
| C | 3.64562700  | -2.31414400 | -2.02370200 |
| H | 4.19966800  | -2.46671700 | -2.95869300 |
| H | 4.36700700  | -2.35008800 | -1.20488200 |
| H | 2.95762900  | -3.15550100 | -1.90710100 |
| O | -0.25927300 | 2.21007300  | 0.23660900  |
| C | -1.50202500 | 2.29942100  | 0.76165000  |
| O | -2.03593300 | 1.41339900  | 1.40327900  |
| C | -2.13018200 | 3.65231900  | 0.42807000  |
| C | -3.54815700 | 3.69951300  | 1.01370300  |
| H | -3.53637900 | 3.51162900  | 2.08983000  |
| H | -3.98278600 | 4.68793800  | 0.83557400  |
| H | -4.19165700 | 2.95356200  | 0.54079100  |
| C | -1.25221600 | 4.75050000  | 1.06612300  |
| H | -0.25429500 | 4.75854800  | 0.62324400  |
| H | -1.71802300 | 5.72855500  | 0.90603700  |
| H | -1.13516500 | 4.58335400  | 2.13973700  |
| C | -2.19038200 | 3.83035300  | -1.10244800 |
| H | -1.18866900 | 3.86102700  | -1.53698200 |
| H | -2.75073500 | 3.01226700  | -1.56398200 |
| H | -2.69230000 | 4.77405700  | -1.34012500 |
| C | -0.06742600 | -1.51721300 | -0.05069200 |
| C | 0.60496700  | -1.86768000 | 0.98127700  |
| C | 0.63119700  | -2.83641300 | 2.10679200  |
| C | -1.30765900 | -1.94005700 | -0.78482700 |
| H | -1.02025300 | -2.81923700 | -1.37656200 |
| H | 1.43735200  | -3.56814000 | 2.00270700  |
| O | -1.76352600 | -0.99349500 | -1.73770300 |
| H | -2.36344700 | -0.34673300 | -1.29940300 |
| C | -2.41638800 | -2.36453900 | 0.16933600  |
| C | -3.28810900 | -3.39096000 | -0.21012700 |
| C | -2.62579300 | -1.70534900 | 1.38713000  |
| C | -4.35271200 | -3.76016000 | 0.61241500  |
| H | -3.13308200 | -3.89822500 | -1.15883900 |
| C | -3.69239800 | -2.07242500 | 2.20867400  |
| H | -1.96872500 | -0.89326900 | 1.67693300  |
| C | -4.55657600 | -3.10081800 | 1.82634000  |
| H | -5.01975300 | -4.56131300 | 0.30791200  |

|   |             |             |             |
|---|-------------|-------------|-------------|
| H | -3.84756200 | -1.54975200 | 3.14783800  |
| H | -5.38344100 | -3.38692500 | 2.46965500  |
| H | 0.75681300  | -2.32957400 | 3.06750200  |
| H | -0.32887700 | -3.36388700 | 2.10297500  |
| C | -5.15053300 | -0.51322000 | -2.13044600 |
| C | -4.92061600 | -0.04066900 | -0.70608800 |
| H | -5.17012100 | 0.33622900  | -2.82023400 |
| H | -4.34359900 | -1.18536600 | -2.43402400 |
| H | -6.10342400 | -1.04594700 | -2.20683200 |
| H | -4.91013500 | -0.89400200 | -0.01959600 |
| H | -5.72182000 | 0.64163900  | -0.38884200 |
| O | -3.66272800 | 0.64487300  | -0.66253900 |
| H | -3.39214600 | 0.80551900  | 0.25997600  |

### II-b2s

|    |             |             |             |
|----|-------------|-------------|-------------|
| N  | -0.15763600 | 0.86423400  | -0.88161300 |
| C  | -1.89022800 | -0.10524300 | -2.17830600 |
| C  | -3.07317000 | 0.42069900  | -2.73883300 |
| H  | -3.03151900 | 1.43188100  | -3.12803500 |
| C  | -4.23924700 | -0.32491800 | -2.80573700 |
| H  | -5.13682400 | 0.10568000  | -3.23924900 |
| C  | -4.24708300 | -1.64202000 | -2.32291200 |
| H  | -5.15307200 | -2.23891600 | -2.37337300 |
| C  | -3.08528600 | -2.18696900 | -1.79979800 |
| H  | -3.08228900 | -3.21364200 | -1.44625500 |
| C  | -1.87911600 | -1.45224600 | -1.70873400 |
| C  | -1.19848100 | 0.75089600  | 2.43915800  |
| C  | -2.16491000 | 1.63661000  | 1.77637300  |
| C  | -3.27289500 | 0.86301500  | 1.41574700  |
| C  | -3.04622700 | -0.51435100 | 1.88066300  |
| C  | -1.82150700 | -0.55328600 | 2.59781300  |
| Rh | -1.38593800 | -0.09549800 | 0.49541000  |
| C  | -0.75675600 | 0.91244300  | -2.09971100 |
| O  | -0.55980800 | 1.73524500  | -2.99056400 |
| C  | -1.28417500 | -1.69720300 | 3.39661900  |
| H  | -1.59742500 | -1.60222700 | 4.44408100  |
| H  | -1.66253700 | -2.65080100 | 3.02070900  |
| H  | -0.19574900 | -1.71535400 | 3.34925200  |
| C  | 0.06935500  | 1.22330000  | 3.07301000  |
| H  | -0.15623300 | 1.83155200  | 3.95919700  |
| H  | 0.69538800  | 0.38301400  | 3.36655100  |
| H  | 0.64157800  | 1.84033000  | 2.37664500  |
| C  | -1.92066200 | 3.08766600  | 1.50488300  |
| H  | -1.88879800 | 3.65505000  | 2.44260700  |



|   |             |             |             |
|---|-------------|-------------|-------------|
| H | -0.96759300 | 3.22711100  | 0.99084100  |
| H | -2.70522600 | 3.51584400  | 0.87774900  |
| C | -4.48404700 | 1.28451200  | 0.64700900  |
| H | -5.37580500 | 1.25106100  | 1.28456500  |
| H | -4.38090100 | 2.29936100  | 0.25871000  |
| H | -4.66155500 | 0.61837000  | -0.20338800 |
| C | -4.03818700 | -1.62488200 | 1.72990300  |
| H | -4.84456500 | -1.52806900 | 2.46794500  |
| H | -4.49133700 | -1.61523000 | 0.73525800  |
| H | -3.56475700 | -2.59822300 | 1.87305500  |
| O | 0.48116800  | 2.10433400  | -0.57148100 |
| C | 1.73016000  | 2.25702200  | -1.06057200 |
| O | 2.35621600  | 1.38117900  | -1.62519000 |
| C | 2.25308400  | 3.66380700  | -0.76956300 |
| C | 3.68749600  | 3.76481800  | -1.30502700 |
| H | 3.72310000  | 3.56356300  | -2.37815100 |
| H | 4.07695100  | 4.77119100  | -1.12289200 |
| H | 4.34244400  | 3.04456800  | -0.80744800 |
| C | 1.33924400  | 4.68462200  | -1.47773600 |
| H | 0.32064000  | 4.63689500  | -1.08670600 |
| H | 1.72876600  | 5.69615600  | -1.32249400 |
| H | 1.29333700  | 4.48970200  | -2.55280300 |
| C | 2.24793100  | 3.89726800  | 0.75614100  |
| H | 1.23023200  | 3.91138500  | 1.15327900  |
| H | 2.80829500  | 3.10943900  | 1.26784000  |
| H | 2.71290300  | 4.86299400  | 0.97979100  |
| C | -0.19398400 | -1.67628200 | -0.01282500 |
| C | -0.66592100 | -2.16415900 | -1.16863500 |
| C | -0.17456000 | -3.35610600 | -1.95933500 |
| C | 0.99430300  | -2.19692700 | 0.76882300  |
| H | 0.68668000  | -3.12881700 | 1.26331500  |
| H | -1.01069300 | -3.99510700 | -2.26562600 |
| O | 1.38049400  | -1.33538000 | 1.84132800  |
| H | 1.91908500  | -0.60149100 | 1.47201400  |
| C | 2.21722400  | -2.50234600 | -0.08783000 |
| C | 3.09286700  | -3.52116000 | 0.30292700  |
| C | 2.53790400  | -1.72190700 | -1.20462000 |
| C | 4.26777500  | -3.76354100 | -0.41012800 |
| H | 2.85270600  | -4.12451800 | 1.17477200  |
| C | 3.71824000  | -1.95369100 | -1.91069000 |
| H | 1.87185900  | -0.92470300 | -1.51216000 |
| C | 4.58506000  | -2.97702400 | -1.51945100 |
| H | 4.93467900  | -4.56266100 | -0.09920300 |
| H | 3.95645800  | -1.32946800 | -2.76672200 |

|   |            |             |             |
|---|------------|-------------|-------------|
| H | 5.49988800 | -3.16149300 | -2.07511400 |
| H | 0.33378400 | -3.02879700 | -2.87544900 |
| H | 0.53161600 | -3.96147200 | -1.39053300 |
| C | 4.50733300 | -0.44698700 | 2.70532600  |
| C | 4.47738100 | -0.07186300 | 1.23470800  |
| H | 4.35557100 | 0.43733700  | 3.33260300  |
| H | 3.71477900 | -1.16834900 | 2.92070600  |
| H | 5.47239500 | -0.89360600 | 2.96433900  |
| H | 4.61393300 | -0.96293400 | 0.61222600  |
| H | 5.28398100 | 0.63623300  | 0.99713700  |
| O | 3.20896200 | 0.53552500  | 0.94873700  |
| H | 3.10673100 | 0.60631000  | -0.01632700 |

**I-a<sub>2s</sub>**

|    |             |             |             |
|----|-------------|-------------|-------------|
| N  | 1.23699600  | 1.14614200  | 0.36655600  |
| C  | 1.59946000  | 0.05237300  | 2.36552500  |
| C  | 1.80311400  | -0.03170600 | 3.74404200  |
| H  | 1.96045100  | 0.88817200  | 4.29939000  |
| C  | 1.79003700  | -1.27963500 | 4.36425000  |
| H  | 1.94203000  | -1.36016500 | 5.43627000  |
| C  | 1.56591400  | -2.42760200 | 3.59870800  |
| H  | 1.53360200  | -3.40160100 | 4.07976300  |
| C  | 1.36667200  | -2.33637000 | 2.21767200  |
| H  | 1.16998800  | -3.24268200 | 1.65278800  |
| C  | 1.39230400  | -1.09367800 | 1.58586600  |
| C  | 2.40839400  | -0.47110800 | -2.41002000 |
| C  | 3.34213800  | -0.59969500 | -1.30710900 |
| C  | 3.20613300  | -1.91237500 | -0.75166700 |
| C  | 2.12529100  | -2.56887500 | -1.43496600 |
| C  | 1.66719200  | -1.68264700 | -2.48536600 |
| Rh | 1.29167200  | -0.74542900 | -0.43745000 |
| C  | 1.56345900  | 1.36924100  | 1.67231400  |
| O  | 1.74039300  | 2.47107900  | 2.19704400  |
| C  | 0.59000200  | -2.03458700 | -3.46333500 |
| H  | 0.93570100  | -2.82032200 | -4.14492500 |
| H  | -0.30145800 | -2.40651100 | -2.94930900 |
| H  | 0.29508800  | -1.17322600 | -4.06495500 |
| C  | 2.30117800  | 0.72626700  | -3.30343900 |
| H  | 3.15256400  | 0.78009600  | -3.99231300 |
| H  | 1.38964100  | 0.69533400  | -3.90382400 |
| H  | 2.28414100  | 1.64766600  | -2.71618300 |
| C  | 4.32910700  | 0.44453800  | -0.88699500 |
| H  | 5.25432800  | 0.36366400  | -1.47067000 |
| H  | 3.92067600  | 1.44675900  | -1.03144000 |

|   |             |             |             |
|---|-------------|-------------|-------------|
| H | 4.58561700  | 0.34239300  | 0.16934600  |
| C | 4.07245500  | -2.50107800 | 0.31516400  |
| H | 4.95469500  | -2.97121000 | -0.13632200 |
| H | 4.41375700  | -1.73615700 | 1.01506600  |
| H | 3.54118700  | -3.25715200 | 0.89425700  |
| C | 1.67082000  | -3.98321100 | -1.24468000 |
| H | 2.19961400  | -4.66334200 | -1.92432700 |
| H | 1.85541400  | -4.32637600 | -0.22463700 |
| H | 0.60072400  | -4.08230900 | -1.44408500 |
| O | 1.28424500  | 2.32364500  | -0.43035500 |
| C | 0.25105100  | 3.16372800  | -0.23498600 |
| O | -0.71701300 | 2.88840800  | 0.45551900  |
| C | 0.39613900  | 4.46180000  | -1.02354300 |
| C | -0.47202500 | 5.53617200  | -0.34721800 |
| H | -0.16153000 | 5.69700200  | 0.68867000  |
| H | -0.36793300 | 6.47974900  | -0.89122400 |
| H | -1.52671100 | 5.25266900  | -0.34991500 |
| C | 1.86766400  | 4.90903400  | -1.06661600 |
| H | 2.49013600  | 4.18990100  | -1.60356200 |
| H | 1.93899200  | 5.87472200  | -1.57660200 |
| H | 2.27165800  | 5.01664600  | -0.05638500 |
| C | -0.13425600 | 4.19716100  | -2.45182300 |
| H | 0.46958300  | 3.44531800  | -2.96879600 |
| H | -1.17539800 | 3.86223000  | -2.42783300 |
| H | -0.08633800 | 5.12479900  | -3.03046100 |
| C | -0.78628100 | -0.34482600 | -0.99919600 |
| C | -0.81130600 | -1.28746400 | -0.18135400 |
| C | -1.53626100 | -2.28745500 | 0.65266000  |
| O | -1.72987000 | -1.85431100 | 1.97254500  |
| H | -1.68714800 | -0.86996900 | 2.00002700  |
| C | -1.24003000 | 0.65423400  | -1.97613500 |
| H | -1.63691100 | 0.14769600  | -2.86297800 |
| H | -2.03311500 | 1.28378500  | -1.55552400 |
| H | -0.42557800 | 1.30647000  | -2.29124200 |
| H | -0.94778600 | -3.21388700 | 0.68912100  |
| C | -2.84323600 | -2.57494600 | -0.08396600 |
| C | -2.89158300 | -3.55392500 | -1.07941800 |
| C | -3.97898800 | -1.80700700 | 0.18312300  |
| C | -4.06238000 | -3.76379600 | -1.80871900 |
| H | -2.00961500 | -4.15980500 | -1.27803700 |
| C | -5.15079200 | -2.01694100 | -0.54369400 |
| H | -3.93285800 | -1.05736200 | 0.96582800  |
| C | -5.19508900 | -2.99209700 | -1.54294700 |
| H | -4.09352700 | -4.53202500 | -2.57609300 |

|   |             |             |             |
|---|-------------|-------------|-------------|
| H | -6.03097800 | -1.41806200 | -0.33049600 |
| H | -6.10917500 | -3.15414200 | -2.10631500 |
| C | -5.25172000 | 1.73655900  | -0.66097400 |
| C | -4.20145200 | 2.45981000  | 0.16545200  |
| H | -5.67622800 | 2.40907100  | -1.41300700 |
| H | -4.81421700 | 0.87559400  | -1.17451400 |
| H | -6.06503900 | 1.37796800  | -0.02076900 |
| H | -3.74181900 | 1.77152800  | 0.88700700  |
| H | -4.67266900 | 3.27533500  | 0.73728100  |
| O | -3.20902700 | 2.98589400  | -0.71731800 |
| H | -2.39936700 | 3.12351800  | -0.19731800 |
| C | -1.79729400 | 0.50564200  | 4.42485400  |
| C | -1.54978900 | 1.50685400  | 3.31012400  |
| H | -2.79639600 | 0.06751400  | 4.33452200  |
| H | -1.06161400 | -0.30198800 | 4.38560900  |
| H | -1.72344200 | 0.99803000  | 5.39991700  |
| H | -0.53599900 | 1.91545300  | 3.37061400  |
| H | -2.25570700 | 2.34664200  | 3.38045500  |
| O | -1.72883600 | 0.84587300  | 2.04798100  |
| H | -1.23060300 | 1.34483900  | 1.37461500  |

**TS-a<sub>2s</sub>**

|    |             |             |             |
|----|-------------|-------------|-------------|
| N  | 0.92341900  | 1.23985900  | 0.98354300  |
| C  | 0.92779800  | -0.57410900 | 2.41420900  |
| C  | 1.04398400  | -1.09871200 | 3.69942800  |
| H  | 0.74937600  | -0.47289400 | 4.53625800  |
| C  | 1.55302900  | -2.38396500 | 3.88291400  |
| H  | 1.64207800  | -2.79842100 | 4.88232600  |
| C  | 1.96155400  | -3.13293000 | 2.77482300  |
| H  | 2.37106200  | -4.12950100 | 2.91424000  |
| C  | 1.82220100  | -2.61944600 | 1.48674700  |
| H  | 2.09064100  | -3.23516700 | 0.63357700  |
| C  | 1.28207400  | -1.33997600 | 1.28119900  |
| C  | 2.90972700  | 1.22198600  | -1.77536700 |
| C  | 3.72858700  | 1.01394400  | -0.57954000 |
| C  | 4.04143100  | -0.36332700 | -0.48666900 |
| C  | 3.37666400  | -1.03858000 | -1.58577500 |
| C  | 2.74415800  | -0.04490000 | -2.41121800 |
| Rh | 1.77158300  | -0.05969400 | -0.38638000 |
| C  | 0.52292600  | 0.84993200  | 2.21980500  |
| O  | -0.04870700 | 1.54667900  | 3.06573000  |
| C  | 2.04928900  | -0.30805700 | -3.71125600 |
| H  | 2.76871500  | -0.30206300 | -4.53927000 |
| H  | 1.55462400  | -1.28231200 | -3.70830900 |

|   |             |             |             |
|---|-------------|-------------|-------------|
| H | 1.29233300  | 0.44980700  | -3.92234000 |
| C | 2.46507200  | 2.55606200  | -2.28869100 |
| H | 3.26452300  | 3.04725600  | -2.85809100 |
| H | 1.59925500  | 2.45961200  | -2.94878000 |
| H | 2.18537600  | 3.21570800  | -1.46468700 |
| C | 4.14974600  | 2.10743000  | 0.35159000  |
| H | 4.96159000  | 2.69930100  | -0.08817600 |
| H | 3.31475100  | 2.77902500  | 0.56431500  |
| H | 4.49917600  | 1.70589200  | 1.30442400  |
| C | 4.87209700  | -1.03772800 | 0.55959100  |
| H | 5.83062800  | -1.37007900 | 0.14346700  |
| H | 5.08270000  | -0.36423300 | 1.39237200  |
| H | 4.36047200  | -1.91333400 | 0.96929800  |
| C | 3.50273100  | -2.49530300 | -1.91160200 |
| H | 4.34514600  | -2.67037100 | -2.59300800 |
| H | 3.68167400  | -3.08700000 | -1.01155900 |
| H | 2.60174100  | -2.87976100 | -2.39647100 |
| O | 0.53782800  | 2.56459600  | 0.63313700  |
| C | -0.77559300 | 2.76390400  | 0.45259200  |
| O | -1.61750900 | 1.88795400  | 0.58301400  |
| C | -1.10468000 | 4.18083200  | -0.00848500 |
| C | -2.43149900 | 4.60419100  | 0.64973700  |
| H | -2.35264800 | 4.58766400  | 1.74075400  |
| H | -2.67962400 | 5.62339100  | 0.33831900  |
| H | -3.24714500 | 3.94503800  | 0.34685900  |
| C | 0.01080700  | 5.17508700  | 0.34832400  |
| H | 0.95010200  | 4.92621200  | -0.15086000 |
| H | -0.28781900 | 6.17935600  | 0.03219300  |
| H | 0.19510600  | 5.19347100  | 1.42583700  |
| C | -1.29091000 | 4.10765900  | -1.54329400 |
| H | -0.37155000 | 3.77601800  | -2.03586300 |
| H | -2.10383800 | 3.42723700  | -1.80891800 |
| H | -1.53799800 | 5.10395700  | -1.92330800 |
| C | -0.15313800 | -0.45406600 | -0.94893100 |
| C | -0.11072900 | -1.43600400 | -0.11975000 |
| C | -0.84306700 | -2.73026600 | 0.17917500  |
| O | -1.33090500 | -2.79632100 | 1.48639400  |
| H | -1.73832600 | -1.92270200 | 1.69525100  |
| C | -0.99500200 | 0.14864700  | -2.01011300 |
| H | -1.05223300 | -0.52934000 | -2.86900500 |
| H | -2.01539200 | 0.32392500  | -1.65915800 |
| H | -0.59029500 | 1.10597600  | -2.34690000 |
| H | -0.13554500 | -3.55968300 | 0.06417200  |
| C | -1.91794400 | -2.87098300 | -0.89786800 |

|   |             |             |             |
|---|-------------|-------------|-------------|
| C | -1.55453000 | -3.26236700 | -2.19142200 |
| C | -3.25359800 | -2.57648600 | -0.62202900 |
| C | -2.51099000 | -3.34898700 | -3.20140100 |
| H | -0.51370800 | -3.49717500 | -2.40514400 |
| C | -4.21346700 | -2.66559000 | -1.63220700 |
| H | -3.53224300 | -2.27808400 | 0.38117200  |
| C | -3.84652100 | -3.04593600 | -2.92329600 |
| H | -2.21865800 | -3.65833000 | -4.20086700 |
| H | -5.25045800 | -2.43671700 | -1.40819900 |
| H | -4.59551200 | -3.11333500 | -3.70660000 |
| C | -5.85362300 | 0.56406200  | -1.53937700 |
| C | -4.89707200 | 0.97647100  | -0.43369700 |
| H | -6.25849400 | 1.44793600  | -2.04214000 |
| H | -5.33122200 | -0.04473300 | -2.28265000 |
| H | -6.68934100 | -0.01698700 | -1.13474400 |
| H | -4.48187600 | 0.09229900  | 0.06788500  |
| H | -5.43777400 | 1.55966400  | 0.32971600  |
| O | -3.85421400 | 1.75454100  | -1.01381600 |
| H | -3.13854000 | 1.83301100  | -0.35923200 |
| C | -3.07383700 | -1.27804400 | 4.04012900  |
| C | -2.83461000 | -0.01752000 | 3.22695200  |
| H | -3.86553500 | -1.88744000 | 3.59221000  |
| H | -2.16341500 | -1.88324300 | 4.08952000  |
| H | -3.37434500 | -1.02020700 | 5.06075000  |
| H | -2.01115700 | 0.56854100  | 3.64516000  |
| H | -3.73800700 | 0.60935000  | 3.21630900  |
| O | -2.50993400 | -0.39789300 | 1.88036500  |
| H | -2.04439700 | 0.34268200  | 1.45022900  |

## II-a<sub>2S</sub>

|   |            |             |             |
|---|------------|-------------|-------------|
| N | 0.70943800 | 1.04098600  | 1.03311400  |
| C | 1.03887800 | -1.05269000 | 1.91131000  |
| C | 1.80641800 | -1.38243900 | 3.04295600  |
| H | 1.75057400 | -0.73363500 | 3.91123700  |
| C | 2.60746300 | -2.51414800 | 3.05203200  |
| H | 3.19421300 | -2.75862000 | 3.93229200  |
| C | 2.64832000 | -3.34966200 | 1.92328800  |
| H | 3.26789200 | -4.24157700 | 1.93050500  |
| C | 1.88277600 | -3.04729100 | 0.80949400  |
| H | 1.89268100 | -3.70609200 | -0.05342800 |
| C | 1.05402400 | -1.90034300 | 0.76404400  |
| C | 3.16621900 | 1.68900200  | -1.24845000 |
| C | 3.82001800 | 1.69716100  | 0.07071000  |
| C | 4.40399600 | 0.44368300  | 0.26716300  |

|    |             |             |             |
|----|-------------|-------------|-------------|
| C  | 4.14741400  | -0.37052400 | -0.93087700 |
| C  | 3.49038400  | 0.43668900  | -1.89845600 |
| Rh | 2.12482800  | 0.16406000  | -0.18464900 |
| C  | 0.21002400  | 0.22027200  | 1.95860700  |
| O  | -0.70575600 | 0.41993300  | 2.77315400  |
| C  | 3.20001400  | 0.07051200  | -3.31954400 |
| H  | 4.06003000  | 0.30769400  | -3.95791100 |
| H  | 2.98952400  | -0.99658300 | -3.41935700 |
| H  | 2.33746900  | 0.61673100  | -3.70330300 |
| C  | 2.51563300  | 2.88312200  | -1.87126100 |
| H  | 3.26901300  | 3.59578400  | -2.23060500 |
| H  | 1.89102600  | 2.59832700  | -2.72040700 |
| H  | 1.88201800  | 3.39781700  | -1.14483200 |
| C  | 3.74182000  | 2.84671500  | 1.02510700  |
| H  | 4.32051500  | 3.70139000  | 0.65532100  |
| H  | 2.70516800  | 3.17216200  | 1.15145900  |
| H  | 4.12796200  | 2.57637200  | 2.00962600  |
| C  | 5.11130600  | -0.06747500 | 1.48210400  |
| H  | 6.16142700  | -0.29026200 | 1.25851400  |
| H  | 5.08639200  | 0.66129300  | 2.29451700  |
| H  | 4.64933900  | -0.99007200 | 1.84943200  |
| C  | 4.67150200  | -1.75908900 | -1.12726600 |
| H  | 5.73784400  | -1.73609700 | -1.38570100 |
| H  | 4.56138800  | -2.35232500 | -0.21616600 |
| H  | 4.14180200  | -2.27488700 | -1.93110400 |
| O  | 0.06317000  | 2.28715100  | 0.84875500  |
| C  | -1.21688600 | 2.22950400  | 0.38654700  |
| O  | -1.78344100 | 1.18845600  | 0.13211200  |
| C  | -1.84245800 | 3.61664500  | 0.25547100  |
| C  | -2.94086700 | 3.70066200  | 1.34065600  |
| H  | -2.52102300 | 3.54197700  | 2.33884600  |
| H  | -3.40054300 | 4.69387200  | 1.31283200  |
| H  | -3.71577400 | 2.95490700  | 1.15268600  |
| C  | -0.82213600 | 4.74864000  | 0.44489400  |
| H  | -0.02775200 | 4.70269900  | -0.30634400 |
| H  | -1.33202700 | 5.71110700  | 0.33745300  |
| H  | -0.35880300 | 4.71368600  | 1.43346300  |
| C  | -2.48784700 | 3.70546600  | -1.14240500 |
| H  | -1.73434700 | 3.60730400  | -1.93160600 |
| H  | -3.24312300 | 2.92952700  | -1.27544700 |
| H  | -2.97044900 | 4.68146500  | -1.25538300 |
| C  | 0.49952800  | -0.59239800 | -1.14108800 |
| C  | 0.15814200  | -1.67495400 | -0.43185900 |
| C  | -0.94811600 | -2.72276500 | -0.59734600 |

|   |             |             |             |
|---|-------------|-------------|-------------|
| O | -1.56050100 | -2.97204600 | 0.65389700  |
| H | -1.97955400 | -2.14645200 | 0.98625200  |
| C | -0.10873700 | 0.05662300  | -2.34597700 |
| H | 0.17688800  | -0.46208100 | -3.26770700 |
| H | -1.19795300 | 0.05887700  | -2.29364300 |
| H | 0.22199200  | 1.09559300  | -2.42960300 |
| H | -0.46456100 | -3.67343800 | -0.86605300 |
| C | -1.92320100 | -2.37111900 | -1.70323900 |
| C | -1.68893400 | -2.81064800 | -3.00866600 |
| C | -3.01323100 | -1.53169800 | -1.45363100 |
| C | -2.51302300 | -2.39742000 | -4.05662700 |
| H | -0.84715900 | -3.47048900 | -3.20737100 |
| C | -3.82964700 | -1.10262000 | -2.49896900 |
| H | -3.20483900 | -1.18901900 | -0.44505600 |
| C | -3.57951000 | -1.53259800 | -3.80470400 |
| H | -2.32054800 | -2.74656800 | -5.06739200 |
| H | -4.63247000 | -0.40551900 | -2.28207800 |
| H | -4.21352800 | -1.19761600 | -4.62068700 |
| C | -6.91652700 | 0.95320600  | 0.33361100  |
| C | -5.50375700 | 0.47483600  | 0.62286300  |
| H | -7.00112000 | 2.03000400  | 0.51076600  |
| H | -7.17917200 | 0.76085400  | -0.71151800 |
| H | -7.63955200 | 0.43632800  | 0.97303400  |
| H | -5.42986700 | -0.60991400 | 0.46044000  |
| H | -5.24591500 | 0.65689400  | 1.67589400  |
| O | -4.61752000 | 1.17183800  | -0.24317800 |
| H | -3.69814600 | 0.94716800  | -0.01804700 |
| C | -4.25578700 | -2.72542500 | 2.60833100  |
| C | -3.35145900 | -1.57989400 | 3.03282400  |
| H | -5.12819100 | -2.34562000 | 2.06817600  |
| H | -3.71476600 | -3.41017300 | 1.94980200  |
| H | -4.60745400 | -3.27999200 | 3.48432000  |
| H | -2.49114900 | -1.95895100 | 3.60098200  |
| H | -3.89557900 | -0.88001300 | 3.68371700  |
| O | -2.89670300 | -0.89826400 | 1.86189400  |
| H | -2.19765600 | -0.26522100 | 2.13363700  |

**I-b1<sub>2s</sub>**

|   |             |            |             |
|---|-------------|------------|-------------|
| N | -0.65432400 | 1.05748400 | 0.53560600  |
| C | -2.37592000 | 1.79060000 | -0.83719900 |
| C | -3.09797400 | 2.75239000 | -1.54622800 |
| H | -2.87293800 | 3.79980900 | -1.36946600 |
| C | -4.07340100 | 2.34691700 | -2.45509600 |
| H | -4.63934000 | 3.08332500 | -3.01755200 |



|    |             |             |             |
|----|-------------|-------------|-------------|
| C  | -4.31502600 | 0.98246800  | -2.64187900 |
| H  | -5.06992100 | 0.65834500  | -3.35390100 |
| C  | -3.59165800 | 0.02562200  | -1.92204700 |
| H  | -3.79181800 | -1.02787100 | -2.09560100 |
| C  | -2.61647500 | 0.42175000  | -1.00431300 |
| C  | -1.48299300 | -1.58699200 | 2.37168700  |
| C  | -2.70678500 | -0.86389700 | 2.07244500  |
| C  | -3.43449600 | -1.61812100 | 1.08784100  |
| C  | -2.61496000 | -2.71758900 | 0.67878300  |
| C  | -1.43205600 | -2.71798900 | 1.52116700  |
| Rh | -1.50578600 | -0.79977400 | 0.23079800  |
| C  | -1.31879900 | 2.18054600  | 0.13053900  |
| O  | -1.06024200 | 3.33728700  | 0.47772600  |
| C  | -0.40815100 | -3.80641200 | 1.57528000  |
| H  | -0.72824600 | -4.57404800 | 2.29156700  |
| H  | -0.29198400 | -4.29747900 | 0.60647000  |
| H  | 0.56157600  | -3.42360600 | 1.89645800  |
| C  | -0.48278600 | -1.23646900 | 3.42776400  |
| H  | -0.65914600 | -1.83102800 | 4.33326600  |
| H  | 0.53429000  | -1.42210400 | 3.07637900  |
| H  | -0.55577500 | -0.18230800 | 3.69483500  |
| C  | -3.18698300 | 0.37335100  | 2.76570700  |
| H  | -3.76442500 | 0.12440100  | 3.66449000  |
| H  | -2.34684300 | 1.00350500  | 3.06430400  |
| H  | -3.82394800 | 0.96716000  | 2.10635400  |
| C  | -4.83693900 | -1.33614300 | 0.65501400  |
| H  | -5.53313900 | -1.76235100 | 1.38815300  |
| H  | -5.02979000 | -0.26484200 | 0.58446300  |
| H  | -5.06225700 | -1.77914300 | -0.31548300 |
| C  | -2.96922000 | -3.78534300 | -0.30932000 |
| H  | -3.38705400 | -4.66972800 | 0.18795100  |
| H  | -3.70809900 | -3.42734900 | -1.02950700 |
| H  | -2.08716300 | -4.10430800 | -0.87096300 |
| O  | 0.16601700  | 1.33249900  | 1.66773500  |
| C  | 1.30154500  | 1.99608900  | 1.38313200  |
| O  | 1.76166300  | 2.10194100  | 0.25519800  |
| C  | 1.92310500  | 2.59501200  | 2.64410700  |
| C  | 3.15962000  | 3.41518800  | 2.25064100  |
| H  | 2.90198300  | 4.19520100  | 1.52995000  |
| H  | 3.57684200  | 3.88996500  | 3.14398300  |
| H  | 3.92871600  | 2.77736200  | 1.81095900  |
| C  | 0.86910300  | 3.51344900  | 3.30131500  |
| H  | 0.01640000  | 2.93519000  | 3.66281400  |
| H  | 1.32420200  | 4.03554400  | 4.14931600  |

|   |             |             |             |
|---|-------------|-------------|-------------|
| H | 0.48998200  | 4.24851100  | 2.58780400  |
| C | 2.32599400  | 1.46414200  | 3.61290600  |
| H | 1.45883900  | 0.87535100  | 3.91732300  |
| H | 3.05560400  | 0.79918800  | 3.14556400  |
| H | 2.77445000  | 1.90234800  | 4.51057500  |
| C | 0.31463700  | -1.41868700 | -0.80159900 |
| C | -0.47707300 | -1.16204700 | -1.73008000 |
| C | -0.85631100 | -0.91075000 | -3.12528000 |
| C | 1.59811000  | -1.98644700 | -0.29753800 |
| H | 1.43633300  | -3.06510800 | -0.19185100 |
| H | -1.81549800 | -1.36084900 | -3.38815700 |
| O | 1.97800800  | -1.53605100 | 0.99046400  |
| H | 2.60998700  | -0.78726800 | 0.89965900  |
| C | 2.70142300  | -1.80963100 | -1.33783000 |
| C | 3.71542300  | -2.77323300 | -1.39775000 |
| C | 2.75462300  | -0.70835400 | -2.20081300 |
| C | 4.76857700  | -2.64550100 | -2.30269500 |
| H | 3.67660100  | -3.62794900 | -0.72718800 |
| C | 3.80803500  | -0.58338800 | -3.10879900 |
| H | 1.97807800  | 0.04875500  | -2.18794300 |
| C | 4.81585400  | -1.54770200 | -3.16478200 |
| H | 5.54566700  | -3.40329600 | -2.33914300 |
| H | 3.83394200  | 0.27345900  | -3.77554800 |
| H | 5.63053700  | -1.44773100 | -3.87593500 |
| H | -0.90572900 | 0.16743500  | -3.29095700 |
| H | -0.07482300 | -1.32668600 | -3.77107800 |
| C | 5.64443100  | -1.07302600 | 1.18087700  |
| C | 5.14186400  | 0.07517700  | 0.32488400  |
| H | 5.74527400  | -0.76246100 | 2.22529800  |
| H | 4.93801300  | -1.90595900 | 1.13495400  |
| H | 6.61817400  | -1.42060300 | 0.82296700  |
| H | 5.08340900  | -0.22651800 | -0.72536800 |
| H | 5.81849500  | 0.93801400  | 0.39781200  |
| O | 3.84564800  | 0.43947800  | 0.81042200  |
| H | 3.44020100  | 1.14298300  | 0.27477500  |
| C | -0.29205600 | 3.23166000  | -3.98579200 |
| C | 0.47182100  | 3.16105600  | -2.67359500 |
| H | 0.21665800  | 2.64331900  | -4.75689300 |
| H | -1.30253400 | 2.83249100  | -3.85574400 |
| H | -0.36930400 | 4.26610100  | -4.33697600 |
| H | -0.05944800 | 3.72003700  | -1.89339800 |
| H | 1.46676300  | 3.62125900  | -2.79009900 |
| O | 0.59263200  | 1.79363000  | -2.29910200 |
| H | 0.82441400  | 1.76253900  | -1.35312900 |

**TS-b1<sub>2S</sub>**

|    |             |             |             |
|----|-------------|-------------|-------------|
| N  | -0.55581300 | 0.44864000  | 1.12438400  |
| C  | -2.00029800 | 2.05141100  | 0.26151700  |
| C  | -2.80444500 | 3.18225100  | 0.39213800  |
| H  | -2.62561500 | 3.83952500  | 1.23723000  |
| C  | -3.82388100 | 3.42416400  | -0.53043700 |
| H  | -4.44930200 | 4.30624200  | -0.43200800 |
| C  | -4.04836100 | 2.51895400  | -1.57292900 |
| H  | -4.85031000 | 2.69608400  | -2.28436000 |
| C  | -3.23445400 | 1.39383800  | -1.71222800 |
| H  | -3.38658800 | 0.71818300  | -2.54887100 |
| C  | -2.19138100 | 1.14960900  | -0.80611500 |
| C  | -1.50900700 | -2.81336300 | 0.68844300  |
| C  | -2.60627700 | -2.03738800 | 1.26934700  |
| C  | -3.53121600 | -1.73161500 | 0.24213500  |
| C  | -3.00192300 | -2.26902900 | -0.99898500 |
| C  | -1.79537100 | -2.99120000 | -0.69845800 |
| Rh | -1.49786200 | -0.81507100 | -0.23862000 |
| C  | -1.02566500 | 1.70239200  | 1.33895800  |
| O  | -0.72838100 | 2.44886800  | 2.28034400  |
| C  | -1.00440300 | -3.81959700 | -1.66218900 |
| H  | -1.36362600 | -4.85638800 | -1.65029800 |
| H  | -1.11056500 | -3.44802600 | -2.68458400 |
| H  | 0.05416300  | -3.81432300 | -1.40022800 |
| C  | -0.37866300 | -3.42625800 | 1.45219400  |
| H  | -0.66654200 | -4.40363600 | 1.86121800  |
| H  | 0.49272700  | -3.55056000 | 0.80860000  |
| H  | -0.08477900 | -2.78474300 | 2.28401800  |
| C  | -2.70399600 | -1.66893500 | 2.71694600  |
| H  | -3.05615300 | -2.52350800 | 3.30754800  |
| H  | -1.73003000 | -1.36531500 | 3.10527700  |
| H  | -3.39740900 | -0.84035300 | 2.87341300  |
| C  | -4.81342900 | -0.97190800 | 0.37668300  |
| H  | -5.67526200 | -1.64743500 | 0.31629600  |
| H  | -4.86376800 | -0.44795000 | 1.33311700  |
| H  | -4.91559300 | -0.22218700 | -0.41235900 |
| C  | -3.69995100 | -2.24699800 | -2.32404100 |
| H  | -4.28738300 | -3.16237200 | -2.47058000 |
| H  | -4.38590400 | -1.40057400 | -2.39451700 |
| H  | -2.98763400 | -2.17597100 | -3.15002400 |
| O  | 0.20820800  | -0.03154800 | 2.22446000  |
| C  | 1.41429700  | 0.53787100  | 2.38703300  |
| O  | 1.94884100  | 1.26439100  | 1.56116800  |

|   |             |             |             |
|---|-------------|-------------|-------------|
| C | 2.02351200  | 0.16378600  | 3.73563400  |
| C | 3.45716000  | 0.70744600  | 3.80287900  |
| H | 3.47786900  | 1.78722100  | 3.63930400  |
| H | 3.88048500  | 0.49402700  | 4.78906300  |
| H | 4.08794000  | 0.23258500  | 3.04757500  |
| C | 1.15036700  | 0.82303500  | 4.82713300  |
| H | 0.13638300  | 0.41795400  | 4.81355800  |
| H | 1.59424500  | 0.63333300  | 5.80991900  |
| H | 1.07871000  | 1.90271500  | 4.67338200  |
| C | 2.03324000  | -1.36771900 | 3.90636700  |
| H | 1.01846300  | -1.77029600 | 3.93268400  |
| H | 2.58020400  | -1.84178600 | 3.08700300  |
| H | 2.52494200  | -1.62425500 | 4.85028100  |
| C | 0.05482800  | -0.40439900 | -1.50379600 |
| C | -0.55811500 | 0.65413200  | -1.88466800 |
| C | -0.50792800 | 1.77300000  | -2.86041100 |
| C | 1.24336000  | -1.24056500 | -1.87793700 |
| H | 0.91030500  | -1.88345100 | -2.70304500 |
| H | -1.35955000 | 1.76454100  | -3.54474400 |
| O | 1.63853500  | -2.14567800 | -0.85591600 |
| H | 2.21124000  | -1.66558400 | -0.21593900 |
| C | 2.43247900  | -0.42919500 | -2.38047600 |
| C | 3.36642100  | -1.06584800 | -3.20824900 |
| C | 2.66401800  | 0.89264100  | -1.98831800 |
| C | 4.50994500  | -0.39549200 | -3.63932100 |
| H | 3.19586400  | -2.09714500 | -3.50603500 |
| C | 3.80848300  | 1.56591200  | -2.42077400 |
| H | 1.95431600  | 1.41642000  | -1.36259700 |
| C | 4.73486100  | 0.92658200  | -3.24512500 |
| H | 5.22346700  | -0.90179300 | -4.28293800 |
| H | 3.96296600  | 2.59404400  | -2.10759900 |
| H | 5.62341500  | 1.45222400  | -3.58232200 |
| H | -0.47060000 | 2.72947500  | -2.33595400 |
| H | 0.41508800  | 1.65521400  | -3.43763200 |
| C | 4.99202600  | -2.51487900 | -0.14114400 |
| C | 4.77218700  | -1.04349500 | 0.15937500  |
| H | 4.94603100  | -3.10776900 | 0.77773500  |
| H | 4.21779700  | -2.87416700 | -0.82386200 |
| H | 5.97126500  | -2.66714900 | -0.60514900 |
| H | 4.83311500  | -0.45299200 | -0.76013100 |
| H | 5.53499200  | -0.67107500 | 0.85762700  |
| O | 3.47338900  | -0.90125000 | 0.75133400  |
| H | 3.23585800  | 0.03929900  | 0.82333700  |
| C | 0.11751000  | 5.30464100  | -0.77546000 |

|   |             |            |             |
|---|-------------|------------|-------------|
| C | 0.83527800  | 4.42732000 | 0.23791400  |
| H | 0.68095000  | 5.34771900 | -1.71362900 |
| H | -0.87795900 | 4.90299800 | -0.98853100 |
| H | 0.00430200  | 6.32533500 | -0.39496200 |
| H | 0.24604000  | 4.34645500 | 1.15896100  |
| H | 1.80787300  | 4.87746100 | 0.49791600  |
| O | 1.01847400  | 3.13788400 | -0.33445500 |
| H | 1.23827100  | 2.51152000 | 0.37777500  |

**II-b1<sub>2s</sub>**

|    |             |             |             |
|----|-------------|-------------|-------------|
| N  | -0.17393500 | -0.00804000 | 1.06333300  |
| C  | -1.81482900 | 1.69340300  | 0.96633000  |
| C  | -2.95082900 | 2.02512300  | 1.73180100  |
| H  | -2.89467100 | 1.84932500  | 2.80019500  |
| C  | -4.08792800 | 2.56457000  | 1.15124000  |
| H  | -4.94971600 | 2.80953500  | 1.76458600  |
| C  | -4.11066700 | 2.79929100  | -0.23075500 |
| H  | -4.99392700 | 3.22134700  | -0.70119700 |
| C  | -2.98889900 | 2.51296600  | -0.99308400 |
| H  | -2.99554800 | 2.72224000  | -2.05835700 |
| C  | -1.80917400 | 1.96446900  | -0.43508500 |
| C  | -1.43970400 | -2.76444100 | -0.65849600 |
| C  | -2.37533800 | -2.56056100 | 0.45568700  |
| C  | -3.43768400 | -1.78579200 | -0.01928700 |
| C  | -3.21408500 | -1.52108700 | -1.45065600 |
| C  | -2.04381600 | -2.21351100 | -1.86058200 |
| Rh | -1.47450300 | -0.64913000 | -0.43387200 |
| C  | -0.72770200 | 1.00262000  | 1.77249100  |
| O  | -0.51439000 | 1.27495800  | 2.95672900  |
| C  | -1.53574400 | -2.38060800 | -3.25644900 |
| H  | -1.90722400 | -3.32239600 | -3.67993500 |
| H  | -1.87781300 | -1.56716700 | -3.90055100 |
| H  | -0.44619200 | -2.39233800 | -3.26314800 |
| C  | -0.22807200 | -3.63524900 | -0.58326200 |
| H  | -0.52511500 | -4.69202600 | -0.54784600 |
| H  | 0.41910000  | -3.47465800 | -1.44341800 |
| H  | 0.34681800  | -3.41554400 | 0.31921900  |
| C  | -2.13707400 | -3.05175900 | 1.84920400  |
| H  | -2.18193800 | -4.14667000 | 1.88614100  |
| H  | -1.15161700 | -2.74245000 | 2.20522700  |
| H  | -2.88197400 | -2.65989900 | 2.54451000  |
| C  | -4.59116200 | -1.22530700 | 0.74956700  |
| H  | -5.53635600 | -1.65495900 | 0.39692100  |
| H  | -4.50101700 | -1.43106600 | 1.81768700  |

|   |             |             |             |
|---|-------------|-------------|-------------|
| H | -4.65430200 | -0.13943000 | 0.62396600  |
| C | -4.16410500 | -0.75463500 | -2.31613500 |
| H | -5.03703400 | -1.36678800 | -2.57598100 |
| H | -4.52198000 | 0.14014300  | -1.80036000 |
| H | -3.68441200 | -0.43761100 | -3.24417100 |
| O | 0.51767300  | -0.93025600 | 1.90630400  |
| C | 1.73179900  | -0.52723400 | 2.32269800  |
| O | 2.27261800  | 0.50565700  | 1.96358700  |
| C | 2.33753900  | -1.52498100 | 3.30661600  |
| C | 3.83507000  | -1.21913500 | 3.44621400  |
| H | 3.99890200  | -0.18852500 | 3.76727300  |
| H | 4.28127900  | -1.89396800 | 4.18309700  |
| H | 4.34846600  | -1.36190100 | 2.49122600  |
| C | 1.61677200  | -1.31653300 | 4.65728000  |
| H | 0.54609200  | -1.51243300 | 4.56305700  |
| H | 2.03665900  | -1.99770600 | 5.40463700  |
| H | 1.74058400  | -0.28986700 | 5.01271100  |
| C | 2.14118000  | -2.96925300 | 2.80861200  |
| H | 1.08392400  | -3.24092000 | 2.77184300  |
| H | 2.56679600  | -3.08788300 | 1.80882100  |
| H | 2.64540900  | -3.66061100 | 3.49150400  |
| C | -0.24557900 | 0.51925300  | -1.56948700 |
| C | -0.63342900 | 1.78598300  | -1.36687300 |
| C | -0.08396100 | 3.05497700  | -1.98044700 |
| C | 0.88046600  | 0.01992500  | -2.45114700 |
| H | 0.52628200  | 0.02587500  | -3.49110400 |
| H | -0.89580900 | 3.72748900  | -2.27872400 |
| O | 1.20912700  | -1.35102000 | -2.19633800 |
| H | 1.73690100  | -1.38190800 | -1.37036500 |
| C | 2.16077000  | 0.84378700  | -2.38339000 |
| C | 3.03500100  | 0.85152200  | -3.47597300 |
| C | 2.53032900  | 1.51707600  | -1.21576900 |
| C | 4.25497100  | 1.52558400  | -3.40367800 |
| H | 2.75867500  | 0.32155300  | -4.38400800 |
| C | 3.74776700  | 2.19177300  | -1.13835300 |
| H | 1.84910800  | 1.53673200  | -0.37772900 |
| C | 4.61573600  | 2.19709000  | -2.23242800 |
| H | 4.92242300  | 1.52901100  | -4.26083600 |
| H | 3.99417700  | 2.72495100  | -0.22565700 |
| H | 5.56218800  | 2.72732100  | -2.17863300 |
| H | 0.52837600  | 3.57877700  | -1.23794800 |
| H | 0.53558500  | 2.85416400  | -2.85524100 |
| C | 4.26015800  | -2.72410200 | -1.71149300 |
| C | 4.31675400  | -1.49679600 | -0.82068600 |

|   |             |             |             |
|---|-------------|-------------|-------------|
| H | 4.06678400  | -3.62375100 | -1.11828300 |
| H | 3.46129400  | -2.61213600 | -2.44936600 |
| H | 5.21059100  | -2.85534500 | -2.23801700 |
| H | 4.48155800  | -0.59634300 | -1.42108700 |
| H | 5.13824100  | -1.57935700 | -0.09508200 |
| O | 3.06827700  | -1.39248500 | -0.11760400 |
| H | 3.01452700  | -0.50969600 | 0.28314000  |
| C | -0.05437800 | 5.06811900  | 1.50613200  |
| C | 0.83692500  | 4.04234900  | 2.18905300  |
| H | 0.49048500  | 5.58078700  | 0.70644400  |
| H | -0.92861300 | 4.57953100  | 1.06548500  |
| H | -0.40090200 | 5.81965400  | 2.22362400  |
| H | 0.26824500  | 3.50230200  | 2.95463400  |
| H | 1.67944800  | 4.55220700  | 2.68545000  |
| O | 1.31589200  | 3.13572200  | 1.20216800  |
| H | 1.58137300  | 2.30555100  | 1.63134800  |

**I-b<sub>2s</sub>**

|    |             |             |             |
|----|-------------|-------------|-------------|
| N  | -0.77554300 | 0.77000800  | -0.77060200 |
| C  | -0.45882300 | -0.86046100 | -2.40237900 |
| C  | -0.09169900 | -1.31620200 | -3.67043500 |
| H  | 0.09939400  | -0.58366800 | -4.44876500 |
| C  | 0.00815100  | -2.68457700 | -3.90358300 |
| H  | 0.30336500  | -3.05454700 | -4.88046600 |
| C  | -0.27440600 | -3.58085500 | -2.86948100 |
| H  | -0.20101700 | -4.65100700 | -3.04569900 |
| C  | -0.64267700 | -3.11713700 | -1.60267200 |
| H  | -0.84098900 | -3.83831700 | -0.81594100 |
| C  | -0.72911900 | -1.74701700 | -1.35204500 |
| C  | -3.00877700 | -0.00139600 | 1.67214600  |
| C  | -3.50032500 | -0.46257100 | 0.38397800  |
| C  | -3.32036000 | -1.88349100 | 0.31579900  |
| C  | -2.62748300 | -2.29567800 | 1.50329000  |
| C  | -2.48157200 | -1.12982100 | 2.35199500  |
| Rh | -1.31188700 | -0.84816600 | 0.40935400  |
| C  | -0.64310800 | 0.58317200  | -2.12484900 |
| O  | -0.66367400 | 1.48245700  | -2.97046500 |
| C  | -1.90521600 | -1.15770900 | 3.73184200  |
| H  | -2.57681900 | -1.69428000 | 4.41231400  |
| H  | -0.93964500 | -1.67198700 | 3.74836800  |
| H  | -1.76586700 | -0.14893800 | 4.12355700  |
| C  | -3.09307800 | 1.39908800  | 2.19760400  |
| H  | -3.94519900 | 1.50933700  | 2.87958700  |
| H  | -2.17966300 | 1.68528800  | 2.72361900  |

|   |             |             |             |
|---|-------------|-------------|-------------|
| H | -3.22291600 | 2.10464300  | 1.37749000  |
| C | -4.18565400 | 0.38556100  | -0.64157800 |
| H | -5.25293100 | 0.48662900  | -0.40943500 |
| H | -3.74514400 | 1.38227200  | -0.67849600 |
| H | -4.09713300 | -0.05289200 | -1.63766800 |
| C | -3.82404500 | -2.77299700 | -0.77540900 |
| H | -4.86212500 | -3.06203000 | -0.56966300 |
| H | -3.79569400 | -2.27079700 | -1.74390900 |
| H | -3.22980700 | -3.68306100 | -0.86212300 |
| C | -2.28690900 | -3.69756700 | 1.90376500  |
| H | -3.08960900 | -4.14224500 | 2.50552400  |
| H | -2.13790800 | -4.33656100 | 1.03076100  |
| H | -1.37172500 | -3.72492100 | 2.50065400  |
| O | -1.35399900 | 2.06053400  | -0.52591900 |
| C | -0.47270400 | 3.06852000  | -0.55551900 |
| O | 0.74096700  | 2.91530500  | -0.48702100 |
| C | -1.11722300 | 4.44092200  | -0.69569300 |
| C | -0.52320200 | 5.35779700  | 0.38920800  |
| H | 0.56679100  | 5.36998800  | 0.32805300  |
| H | -0.89596100 | 6.37791200  | 0.25486700  |
| H | -0.80593000 | 5.01747500  | 1.39064500  |
| C | -0.70174800 | 4.93447200  | -2.10225700 |
| H | -1.04704700 | 4.23862400  | -2.87100200 |
| H | -1.13741600 | 5.92189200  | -2.28541500 |
| H | 0.38580600  | 5.00923200  | -2.17405200 |
| C | -2.64739100 | 4.40090900  | -0.59021100 |
| H | -3.08190400 | 3.75037000  | -1.35246400 |
| H | -2.97315300 | 4.05122800  | 0.39349500  |
| H | -3.04355900 | 5.41102500  | -0.73418700 |
| C | 0.51805000  | -0.48406700 | 1.54037800  |
| C | 0.68532300  | -1.61715500 | 1.04575200  |
| C | 1.38630700  | -2.87129800 | 0.75182600  |
| C | 0.88444200  | 0.61734600  | 2.47762600  |
| H | 0.40042400  | 0.40338700  | 3.43626500  |
| H | 0.74366000  | -3.74209900 | 0.90897800  |
| O | 0.39836100  | 1.89176700  | 2.10804100  |
| H | 0.75472600  | 2.11952400  | 1.23127000  |
| C | 2.39162300  | 0.58646900  | 2.69733900  |
| C | 2.90343100  | 0.40296500  | 3.98408600  |
| C | 3.27600300  | 0.73998500  | 1.62151000  |
| C | 4.28196200  | 0.37496000  | 4.20280900  |
| H | 2.21898300  | 0.28441700  | 4.82064500  |
| C | 4.65193900  | 0.71797100  | 1.84168900  |
| H | 2.90624300  | 0.86522500  | 0.60878500  |



|   |            |             |             |
|---|------------|-------------|-------------|
| C | 5.15933400 | 0.53323600  | 3.13027700  |
| H | 4.66758500 | 0.23078600  | 5.20781900  |
| H | 5.32768600 | 0.83593600  | 0.99993000  |
| H | 6.23236300 | 0.51084700  | 3.29600600  |
| H | 1.74148500 | -2.86356000 | -0.28304800 |
| H | 2.25080300 | -2.94676000 | 1.42121800  |
| C | 4.74517500 | -3.14494000 | -1.26968700 |
| C | 4.11752000 | -1.77008200 | -1.10477400 |
| H | 4.09555500 | -3.91864100 | -0.84725800 |
| H | 4.89037000 | -3.37065500 | -2.33048000 |
| H | 5.71521800 | -3.19462100 | -0.76411300 |
| H | 4.79579100 | -1.00051100 | -1.50456700 |
| H | 3.98150400 | -1.54605700 | -0.03509700 |
| O | 2.87830700 | -1.75622300 | -1.79361100 |
| H | 2.51595100 | -0.84849300 | -1.72471500 |
| C | 3.75771400 | 0.95159400  | -3.55550000 |
| C | 2.60794400 | 1.63956700  | -2.84038500 |
| H | 4.67235400 | 0.99930000  | -2.95578700 |
| H | 3.51971400 | -0.10141800 | -3.73106100 |
| H | 3.95187600 | 1.43601700  | -4.51766800 |
| H | 1.70461600 | 1.64160700  | -3.46082000 |
| H | 2.86070400 | 2.68472800  | -2.61427400 |
| O | 2.34357200 | 0.93833100  | -1.61859600 |
| H | 1.61526400 | 1.40334700  | -1.16658000 |

**TS-b2<sub>2s</sub>**

|    |             |             |             |
|----|-------------|-------------|-------------|
| N  | -0.71130400 | 0.96741000  | -0.76453600 |
| C  | 0.17555500  | -0.56555200 | -2.25941700 |
| C  | 0.68355800  | -0.89140100 | -3.51452900 |
| H  | 1.14921100  | -0.10398000 | -4.09797000 |
| C  | 0.55839200  | -2.19350500 | -3.99878400 |
| H  | 0.95732700  | -2.45174900 | -4.97469400 |
| C  | -0.09082400 | -3.16339700 | -3.22848100 |
| H  | -0.20682500 | -4.17370700 | -3.61106600 |
| C  | -0.56450100 | -2.84790400 | -1.95493500 |
| H  | -1.00641800 | -3.62490200 | -1.33744600 |
| C  | -0.42167800 | -1.54993000 | -1.44027900 |
| C  | -3.52007800 | 0.23621200  | 0.95159700  |
| C  | -3.79545600 | 0.04564300  | -0.47548600 |
| C  | -3.75973400 | -1.34212000 | -0.75401900 |
| C  | -3.41666700 | -2.03049500 | 0.47768200  |
| C  | -3.34799900 | -1.05499100 | 1.53225300  |
| Rh | -1.72982900 | -0.65160700 | 0.03205700  |
| C  | 0.11006100  | 0.86466800  | -1.83643800 |

|   |             |             |             |
|---|-------------|-------------|-------------|
| O | 0.67200000  | 1.80264800  | -2.41848400 |
| C | -3.16418600 | -1.34772800 | 2.98837800  |
| H | -4.13448200 | -1.55294200 | 3.45758700  |
| H | -2.53248500 | -2.22577800 | 3.14551400  |
| H | -2.71379200 | -0.50043800 | 3.50851800  |
| C | -3.53098300 | 1.54278600  | 1.68342800  |
| H | -4.51315300 | 1.73700300  | 2.13276200  |
| H | -2.77420900 | 1.54891400  | 2.47141100  |
| H | -3.30301600 | 2.36423600  | 1.00280100  |
| C | -4.07796000 | 1.15488500  | -1.43998300 |
| H | -5.11950800 | 1.48733300  | -1.35250500 |
| H | -3.43020400 | 2.01182300  | -1.24590900 |
| H | -3.90795300 | 0.83825800  | -2.47089100 |
| C | -4.00509900 | -2.01053600 | -2.07009900 |
| H | -4.96099500 | -2.54784300 | -2.06088900 |
| H | -4.03647300 | -1.28421000 | -2.88425100 |
| H | -3.21565700 | -2.73073200 | -2.30341000 |
| C | -3.34965200 | -3.51648700 | 0.65286100  |
| H | -4.32980400 | -3.92267100 | 0.93381400  |
| H | -3.04433200 | -4.00949600 | -0.27266200 |
| H | -2.63891800 | -3.79494600 | 1.43506600  |
| O | -1.03730600 | 2.32128500  | -0.46971200 |
| C | -0.08271000 | 3.02843800  | 0.15032900  |
| O | 0.90882500  | 2.53088400  | 0.66887700  |
| C | -0.33592900 | 4.52950400  | 0.09910900  |
| C | 0.10103900  | 5.14747600  | 1.43703500  |
| H | 1.12946800  | 4.86925800  | 1.67435800  |
| H | 0.03477100  | 6.23809100  | 1.37876700  |
| H | -0.54182400 | 4.81021300  | 2.25672300  |
| C | 0.57119200  | 5.03813400  | -1.04960900 |
| H | 0.34766400  | 4.51287800  | -1.98122100 |
| H | 0.41123800  | 6.11191600  | -1.18939500 |
| H | 1.62419800  | 4.86897700  | -0.81074500 |
| C | -1.80202800 | 4.87379400  | -0.20253700 |
| H | -2.11880900 | 4.47048900  | -1.16638400 |
| H | -2.47116200 | 4.48641600  | 0.57183200  |
| H | -1.91660600 | 5.96187500  | -0.23020700 |
| C | -0.10269600 | -0.89073200 | 1.24594900  |
| C | 0.40687600  | -1.67528100 | 0.36880400  |
| C | 1.48092200  | -2.67947100 | 0.16399200  |
| C | 0.19703800  | -0.39444500 | 2.62970300  |
| H | -0.43797200 | -0.94896300 | 3.32837800  |
| H | 1.07094600  | -3.68353400 | 0.02283900  |
| O | -0.15996900 | 0.96694700  | 2.80116800  |

|   |            |             |             |
|---|------------|-------------|-------------|
| H | 0.26925400 | 1.47372600  | 2.08909900  |
| C | 1.64857000 | -0.69912400 | 2.96550900  |
| C | 1.96313700 | -1.78006100 | 3.79319600  |
| C | 2.68459100 | 0.03240200  | 2.37441900  |
| C | 3.29436200 | -2.13309000 | 4.02545000  |
| H | 1.16139600 | -2.35387800 | 4.25231500  |
| C | 4.01279800 | -0.31833400 | 2.60371300  |
| H | 2.46448500 | 0.86605300  | 1.72086300  |
| C | 4.32265700 | -1.40396500 | 3.42749100  |
| H | 3.52602300 | -2.97544400 | 4.67076800  |
| H | 4.80153400 | 0.25156300  | 2.12287100  |
| H | 5.35859100 | -1.67957400 | 3.60107500  |
| H | 2.09736300 | -2.41378000 | -0.69927100 |
| H | 2.09738300 | -2.67655700 | 1.06912100  |
| C | 5.11854300 | -2.94190300 | -1.46069400 |
| C | 4.68507900 | -1.58413900 | -0.93129500 |
| H | 4.30344500 | -3.66765700 | -1.37291300 |
| H | 5.39043100 | -2.86782700 | -2.51815900 |
| H | 5.98141600 | -3.32135500 | -0.90332400 |
| H | 5.52668900 | -0.87560300 | -0.99239300 |
| H | 4.41453800 | -1.66479100 | 0.13264200  |
| O | 3.58680500 | -1.12967800 | -1.70555000 |
| H | 3.30648400 | -0.26665300 | -1.33145600 |
| C | 4.93467300 | 1.90828400  | -2.06858200 |
| C | 3.61618100 | 2.36342500  | -1.46740100 |
| H | 5.67697100 | 1.72860100  | -1.28399700 |
| H | 4.79215400 | 0.97880700  | -2.62677500 |
| H | 5.32833700 | 2.67142000  | -2.74742700 |
| H | 2.87035900 | 2.54035700  | -2.24867600 |
| H | 3.75492400 | 3.29782600  | -0.90272700 |
| O | 3.14243000 | 1.33891800  | -0.58354600 |
| H | 2.24490000 | 1.58902900  | -0.30516100 |

### II-b<sub>2s</sub>

|   |             |             |             |
|---|-------------|-------------|-------------|
| N | -0.48318800 | 0.89657500  | -0.73391900 |
| C | -0.49012500 | -0.98327800 | -2.19398900 |
| C | -1.19725300 | -1.37259300 | -3.35238800 |
| H | -1.48852800 | -0.58754000 | -4.04070600 |
| C | -1.49415500 | -2.69907300 | -3.61026700 |
| H | -2.03662800 | -2.97065800 | -4.51056900 |
| C | -1.08258400 | -3.68862400 | -2.70354000 |
| H | -1.30934700 | -4.73363000 | -2.89298800 |
| C | -0.36225200 | -3.32988600 | -1.57813800 |
| H | -0.01579600 | -4.09857600 | -0.89517200 |

|    |             |             |             |
|----|-------------|-------------|-------------|
| C  | -0.02645700 | -1.98334200 | -1.28416900 |
| C  | -3.08415200 | 0.21824700  | 1.47489800  |
| C  | -3.75793000 | 0.16686500  | 0.17310600  |
| C  | -3.81610500 | -1.17572400 | -0.21899100 |
| C  | -3.21039800 | -1.99702300 | 0.83900500  |
| C  | -2.86329900 | -1.14180200 | 1.92129800  |
| Rh | -1.60026800 | -0.64142100 | 0.19290600  |
| C  | -0.36523900 | 0.52679900  | -2.04907100 |
| O  | -0.29042300 | 1.26629900  | -3.02460300 |
| C  | -2.42885500 | -1.54424700 | 3.29305900  |
| H  | -3.30515100 | -1.61481800 | 3.95006900  |
| H  | -1.94064600 | -2.52135100 | 3.28875900  |
| H  | -1.74127900 | -0.80921500 | 3.71279900  |
| C  | -2.91925000 | 1.44736900  | 2.30705400  |
| H  | -3.81846600 | 1.62079000  | 2.91294200  |
| H  | -2.05735500 | 1.35003700  | 2.96774300  |
| H  | -2.77472700 | 2.32377800  | 1.67324500  |
| C  | -4.21542800 | 1.37051100  | -0.58903800 |
| H  | -5.05806000 | 1.85662500  | -0.08330200 |
| H  | -3.40883100 | 2.10109400  | -0.67553900 |
| H  | -4.53485600 | 1.10603800  | -1.59899300 |
| C  | -4.34328400 | -1.73966900 | -1.49807000 |
| H  | -5.23285600 | -2.35247200 | -1.30927900 |
| H  | -4.61491100 | -0.95344800 | -2.20449400 |
| H  | -3.59836700 | -2.37870800 | -1.98177300 |
| C  | -3.14927600 | -3.49224500 | 0.81825300  |
| H  | -4.11720300 | -3.92769600 | 1.09718900  |
| H  | -2.89100800 | -3.85961000 | -0.17807900 |
| H  | -2.39691400 | -3.86418800 | 1.51698400  |
| O  | -0.87945800 | 2.27884700  | -0.69107500 |
| C  | -0.24277600 | 3.02690700  | 0.22674600  |
| O  | 0.52259800  | 2.58311100  | 1.06301300  |
| C  | -0.58087300 | 4.51115900  | 0.04751800  |
| C  | 0.09689400  | 5.30725100  | 1.16953900  |
| H  | 1.17872800  | 5.15695800  | 1.15948700  |
| H  | -0.10916200 | 6.37387500  | 1.03842000  |
| H  | -0.27154900 | 5.00061700  | 2.15226800  |
| C  | -0.05003600 | 4.95909600  | -1.33309400 |
| H  | -0.45226100 | 4.33170300  | -2.13156000 |
| H  | -0.34202300 | 5.99838000  | -1.51354200 |
| H  | 1.04091200  | 4.90412400  | -1.37108400 |
| C  | -2.10719700 | 4.72164300  | 0.09335700  |
| H  | -2.60764300 | 4.19092600  | -0.71909200 |
| H  | -2.53051200 | 4.38812900  | 1.04597000  |

|   |             |             |             |
|---|-------------|-------------|-------------|
| H | -2.32694400 | 5.78868700  | -0.01100400 |
| C | 0.25525700  | -1.11651000 | 0.91742400  |
| C | 0.87094500  | -1.76490500 | -0.08143800 |
| C | 2.22118400  | -2.43836800 | -0.16918400 |
| C | 0.68837900  | -0.80240400 | 2.33219800  |
| H | 0.25534800  | -1.57920400 | 2.97413400  |
| H | 2.10262800  | -3.52739100 | -0.24038900 |
| O | 0.11120000  | 0.41706500  | 2.79750100  |
| H | 0.30024200  | 1.10972200  | 2.13730800  |
| C | 2.18890800  | -0.82168800 | 2.56406800  |
| C | 2.77146600  | -1.85808600 | 3.29881500  |
| C | 3.00981700  | 0.17706200  | 2.02845700  |
| C | 4.15520500  | -1.91997000 | 3.47214600  |
| H | 2.13729200  | -2.63227500 | 3.72458200  |
| C | 4.39107100  | 0.11597300  | 2.19744700  |
| H | 2.58001800  | 0.98444300  | 1.44944800  |
| C | 4.97011800  | -0.93463700 | 2.91454500  |
| H | 4.59436500  | -2.73553700 | 4.03946600  |
| H | 5.01750000  | 0.88641100  | 1.75792000  |
| H | 6.04786300  | -0.98223400 | 3.03940200  |
| H | 2.74670500  | -2.10867600 | -1.07177200 |
| H | 2.84302500  | -2.22792700 | 0.69623500  |
| C | 6.08494200  | -1.93751300 | -2.04895600 |
| C | 5.19822500  | -0.82026200 | -1.52301700 |
| H | 5.56599900  | -2.89910400 | -1.98416800 |
| H | 6.33764000  | -1.76011200 | -3.09900300 |
| H | 7.01395100  | -2.00326700 | -1.47275500 |
| H | 5.74729300  | 0.13572900  | -1.55423500 |
| H | 4.94423500  | -1.00670800 | -0.46894300 |
| O | 4.03006300  | -0.75613000 | -2.32611500 |
| H | 3.41784700  | -0.13016500 | -1.88863200 |
| C | 3.92569200  | 2.57125600  | -2.24314800 |
| C | 2.56714300  | 2.38931900  | -1.58850900 |
| H | 4.72179700  | 2.52601700  | -1.49324500 |
| H | 4.10495500  | 1.78283500  | -2.97899700 |
| H | 3.97816600  | 3.54270000  | -2.74478800 |
| H | 1.76455200  | 2.46185900  | -2.33177000 |
| H | 2.40725500  | 3.16675500  | -0.82944600 |
| O | 2.53607000  | 1.10399400  | -0.95872100 |
| H | 1.63678300  | 0.93308100  | -0.62588200 |

**I-a1<sub>2a</sub>**

|   |             |             |            |
|---|-------------|-------------|------------|
| N | -0.06416900 | -1.48678200 | 0.41976000 |
| C | -0.07441700 | -0.36007600 | 2.43900300 |

|    |             |             |             |
|----|-------------|-------------|-------------|
| C  | 0.44686400  | 0.03004700  | 3.67448500  |
| H  | 1.37252400  | -0.42648000 | 4.01255400  |
| C  | -0.22876800 | 0.98131800  | 4.43509800  |
| H  | 0.16867200  | 1.29778700  | 5.39450800  |
| C  | -1.41633300 | 1.53488900  | 3.94980300  |
| H  | -1.93854300 | 2.29077100  | 4.53051300  |
| C  | -1.93319700 | 1.14101900  | 2.71196400  |
| H  | -2.83777800 | 1.61461000  | 2.34229300  |
| C  | -1.26867400 | 0.18222300  | 1.94911800  |
| C  | -3.14150500 | -2.18565200 | -0.94238200 |
| C  | -3.11566200 | -2.47283900 | 0.47748200  |
| C  | -3.78183900 | -1.40945500 | 1.16667900  |
| C  | -4.14263600 | -0.41379100 | 0.19297400  |
| C  | -3.77921900 | -0.92312700 | -1.11059500 |
| Rh | -1.90903700 | -0.61348400 | 0.16298600  |
| C  | 0.61636100  | -1.36680700 | 1.59227100  |
| O  | 1.65543300  | -1.96886500 | 1.88983500  |
| C  | -4.06106800 | -0.20355100 | -2.39205100 |
| H  | -5.14180400 | -0.13213200 | -2.55878900 |
| H  | -3.65833500 | 0.81365600  | -2.36596700 |
| H  | -3.62357000 | -0.71722900 | -3.24950000 |
| C  | -2.62421700 | -3.10360800 | -2.00753200 |
| H  | -3.26537800 | -3.98761200 | -2.10783000 |
| H  | -2.59099600 | -2.60863500 | -2.98039600 |
| H  | -1.61414100 | -3.44481800 | -1.77112000 |
| C  | -2.54595800 | -3.71566500 | 1.08811600  |
| H  | -3.26680900 | -4.54070200 | 1.03380500  |
| H  | -1.63649400 | -4.01971100 | 0.56616900  |
| H  | -2.28919100 | -3.55960300 | 2.13757800  |
| C  | -4.09630400 | -1.37669800 | 2.62793400  |
| H  | -5.07687600 | -1.83337300 | 2.81035900  |
| H  | -3.35177800 | -1.92689700 | 3.20624400  |
| H  | -4.11720000 | -0.35672600 | 3.01328300  |
| C  | -4.92609900 | 0.83986700  | 0.43391100  |
| H  | -5.99425000 | 0.68167300  | 0.23837100  |
| H  | -4.82769100 | 1.17817500  | 1.46724100  |
| H  | -4.58500400 | 1.64831000  | -0.21839400 |
| O  | 0.40314200  | -2.56898600 | -0.37292100 |
| C  | 1.56279800  | -2.31618400 | -1.03307300 |
| O  | 2.02558400  | -1.20355100 | -1.18579700 |
| C  | 2.21379800  | -3.59730100 | -1.54052700 |
| C  | 2.84597800  | -4.28996300 | -0.31112000 |
| H  | 2.09099600  | -4.51827600 | 0.44323600  |
| H  | 3.33045400  | -5.21837600 | -0.63129700 |

|   |             |             |             |
|---|-------------|-------------|-------------|
| H | 3.59427400  | -3.64277500 | 0.15017700  |
| C | 1.16773000  | -4.52426100 | -2.18663900 |
| H | 0.66665600  | -4.03583200 | -3.02946600 |
| H | 1.66428400  | -5.42235400 | -2.56698600 |
| H | 0.40916600  | -4.83412400 | -1.46447800 |
| C | 3.30498700  | -3.22318100 | -2.55342500 |
| H | 2.87861700  | -2.72669000 | -3.43069400 |
| H | 4.03593800  | -2.54667700 | -2.10652400 |
| H | 3.81891600  | -4.12968700 | -2.88849200 |
| C | -0.99562000 | 0.50272600  | -1.46623400 |
| C | -1.25823500 | 1.33181000  | -0.56774900 |
| C | -1.17607800 | 2.72510000  | -0.03626200 |
| O | -0.12657600 | 2.89829600  | 0.87655300  |
| H | 0.61362500  | 2.30214000  | 0.62464800  |
| C | -0.50368700 | 0.02390200  | -2.76354500 |
| H | -0.35770700 | 0.88940900  | -3.42025700 |
| H | 0.45609200  | -0.48148800 | -2.64243500 |
| H | -1.20574500 | -0.66592200 | -3.23876700 |
| H | -2.10659200 | 2.96980300  | 0.49106000  |
| C | -1.05643500 | 3.61911800  | -1.26838100 |
| C | -2.18486700 | 4.22830200  | -1.81996300 |
| C | 0.18663400  | 3.77093400  | -1.89382300 |
| C | -2.08044100 | 4.98409700  | -2.98920700 |
| H | -3.14866400 | 4.11621100  | -1.32756600 |
| C | 0.29036400  | 4.52380100  | -3.06233800 |
| H | 1.06120800  | 3.29756800  | -1.45775900 |
| C | -0.84156400 | 5.13070600  | -3.61419900 |
| H | -2.96217500 | 5.46162800  | -3.40703500 |
| H | 1.25720700  | 4.64075600  | -3.54355800 |
| H | -0.75621100 | 5.71942600  | -4.52282000 |
| C | 2.96911300  | 1.11391700  | 1.04001600  |
| H | 2.60207900  | 0.49942900  | 1.87041400  |
| O | 1.91668200  | 1.26492100  | 0.06555900  |
| H | 1.74915000  | 0.38216000  | -0.32541000 |
| C | 4.17042600  | 0.41316800  | 0.42667700  |
| C | 4.54399000  | -0.85473700 | 0.87616800  |
| C | 4.86520100  | 1.00666300  | -0.63168400 |
| C | 5.61553600  | -1.52088500 | 0.27682100  |
| H | 3.96906900  | -1.32692400 | 1.66645700  |
| C | 5.92635600  | 0.33762600  | -1.23645200 |
| H | 4.56322000  | 1.99151200  | -0.97495300 |
| C | 6.30607300  | -0.92871800 | -0.78126000 |
| H | 5.90635400  | -2.50506200 | 0.63338400  |
| H | 6.46158800  | 0.80178400  | -2.05999200 |

|   |            |             |             |
|---|------------|-------------|-------------|
| H | 7.13713500 | -1.44856200 | -1.24948400 |
| C | 3.28707400 | 2.45011800  | 1.54333500  |
| C | 3.51977700 | 3.56040200  | 1.95874600  |
| C | 3.78510100 | 4.90386500  | 2.45871200  |
| H | 2.96117500 | 5.58003800  | 2.20516400  |
| H | 3.89375900 | 4.90673800  | 3.54906100  |
| H | 4.70446500 | 5.31814100  | 2.02970300  |

**TS-a1<sub>2a</sub>**

|    |             |             |             |
|----|-------------|-------------|-------------|
| N  | -0.50484900 | 1.33727300  | -0.59787900 |
| C  | -0.30044900 | -0.27002900 | -2.24992900 |
| C  | 0.09263800  | -0.66146600 | -3.52761300 |
| H  | 0.89166400  | -0.10723700 | -4.01028700 |
| C  | -0.55649900 | -1.72002800 | -4.16243100 |
| H  | -0.24930200 | -2.03110900 | -5.15605900 |
| C  | -1.61128900 | -2.37329200 | -3.51858500 |
| H  | -2.12555700 | -3.19287700 | -4.01284700 |
| C  | -1.99496300 | -1.99485900 | -2.23231600 |
| H  | -2.78036000 | -2.54694000 | -1.72450900 |
| C  | -1.33691200 | -0.94727600 | -1.57051200 |
| C  | -3.57169000 | 1.81983200  | 0.84807800  |
| C  | -3.65574700 | 1.98167200  | -0.60432700 |
| C  | -4.20871600 | 0.79926400  | -1.15745700 |
| C  | -4.42238500 | -0.13239700 | -0.06757900 |
| C  | -4.09375600 | 0.52977000  | 1.16471400  |
| Rh | -2.23694100 | 0.33167500  | -0.09467100 |
| C  | 0.28359700  | 0.95419900  | -1.62751300 |
| O  | 1.31230200  | 1.52479500  | -2.02005900 |
| C  | -4.29690500 | -0.04869100 | 2.53045300  |
| H  | -5.35951000 | -0.02617900 | 2.80121200  |
| H  | -3.96441000 | -1.08932200 | 2.57935600  |
| H  | -3.75252400 | 0.51610300  | 3.28954100  |
| C  | -3.13007500 | 2.87529700  | 1.81415900  |
| H  | -3.96322900 | 3.52981600  | 2.10054200  |
| H  | -2.72293300 | 2.42941000  | 2.72510000  |
| H  | -2.34723000 | 3.49765300  | 1.37822900  |
| C  | -3.23115100 | 3.21333800  | -1.34156800 |
| H  | -4.00217000 | 3.99043300  | -1.27329900 |
| H  | -2.30477900 | 3.61418900  | -0.92486100 |
| H  | -3.05254500 | 3.00292600  | -2.39764700 |
| C  | -4.49341400 | 0.51591700  | -2.59917800 |
| H  | -5.57326500 | 0.47039900  | -2.78377100 |
| H  | -4.07515400 | 1.29060600  | -3.24444800 |
| H  | -4.05622000 | -0.43848000 | -2.90747500 |



|   |             |             |             |
|---|-------------|-------------|-------------|
| C | -5.06490500 | -1.48068200 | -0.18260800 |
| H | -6.14626200 | -1.41319500 | -0.00672100 |
| H | -4.91952000 | -1.90434200 | -1.17827800 |
| H | -4.65516100 | -2.18226000 | 0.54891100  |
| O | -0.07431500 | 2.53461400  | 0.02807500  |
| C | 1.04748200  | 2.42404900  | 0.78028200  |
| O | 1.57109100  | 1.36797300  | 1.07550100  |
| C | 1.56608400  | 3.79610300  | 1.20009400  |
| C | 2.08248500  | 4.50192000  | -0.07363300 |
| H | 1.27894300  | 4.63796700  | -0.80043900 |
| H | 2.48824700  | 5.48270700  | 0.19623700  |
| H | 2.87228200  | 3.91466500  | -0.54555500 |
| C | 0.43054800  | 4.62187600  | 1.83428200  |
| H | 0.00494800  | 4.11244300  | 2.70540500  |
| H | 0.82474700  | 5.58695600  | 2.16771400  |
| H | -0.37147800 | 4.81010400  | 1.11709300  |
| C | 2.71251000  | 3.60037800  | 2.20121400  |
| H | 2.36404200  | 3.09175100  | 3.10499300  |
| H | 3.51609800  | 3.00283600  | 1.76797700  |
| H | 3.11553800  | 4.57658300  | 2.48894900  |
| C | -1.05052000 | -0.70310200 | 1.21593600  |
| C | -0.87078000 | -1.56178800 | 0.27942100  |
| C | -0.34195800 | -2.96654600 | 0.05667200  |
| O | 0.68797800  | -3.02986400 | -0.88334500 |
| H | 1.31986400  | -2.30320900 | -0.68468300 |
| C | -0.69175800 | -0.42194200 | 2.62428700  |
| H | -0.30841200 | -1.32147200 | 3.11561200  |
| H | 0.09111800  | 0.34178600  | 2.64106100  |
| H | -1.54927500 | -0.04480300 | 3.18725500  |
| H | -1.15917700 | -3.58448800 | -0.33180500 |
| C | 0.03731300  | -3.49098300 | 1.44046900  |
| C | -0.94614200 | -4.06474500 | 2.25247500  |
| C | 1.33743200  | -3.34774000 | 1.93296600  |
| C | -0.64082200 | -4.48877800 | 3.54500400  |
| H | -1.95751400 | -4.17663900 | 1.86759900  |
| C | 1.64282100  | -3.77117500 | 3.22757700  |
| H | 2.09737300  | -2.88944500 | 1.31050500  |
| C | 0.65801100  | -4.33977000 | 4.03726900  |
| H | -1.41118600 | -4.93807400 | 4.16522500  |
| H | 2.65434100  | -3.65311900 | 3.60534900  |
| H | 0.90036900  | -4.66849000 | 5.04357900  |
| C | 3.33858800  | -0.60716300 | -1.08123400 |
| H | 2.83591000  | -0.14652100 | -1.93900700 |
| O | 2.34601200  | -0.99275300 | -0.11175700 |

|   |            |             |             |
|---|------------|-------------|-------------|
| H | 1.94190800 | -0.17732800 | 0.25217700  |
| C | 4.29914400 | 0.41606700  | -0.49690700 |
| C | 4.48913800 | 1.64173300  | -1.13740700 |
| C | 4.97945500 | 0.14600900  | 0.69456900  |
| C | 5.37063400 | 2.58397000  | -0.60224100 |
| H | 3.92320500 | 1.86024100  | -2.03704300 |
| C | 5.84994200 | 1.08969000  | 1.23499400  |
| H | 4.81457900 | -0.80449200 | 1.19227400  |
| C | 6.05236100 | 2.31045900  | 0.58403100  |
| H | 5.51646900 | 3.53465400  | -1.10714700 |
| H | 6.37380100 | 0.87519300  | 2.16210900  |
| H | 6.73375100 | 3.04498400  | 1.00349200  |
| C | 4.02534400 | -1.82708300 | -1.50804500 |
| C | 4.57234100 | -2.84242600 | -1.86864000 |
| C | 5.22608200 | -4.07232700 | -2.29971300 |
| H | 4.64054400 | -4.94872100 | -2.00044000 |
| H | 5.33521400 | -4.10287000 | -3.38964200 |
| H | 6.22528900 | -4.17070200 | -1.86057100 |

## II-a1<sub>2a</sub>

|    |             |             |             |
|----|-------------|-------------|-------------|
| N  | 0.54489700  | -1.30959300 | -0.53482600 |
| C  | 0.78747100  | 0.24151500  | -2.22590200 |
| C  | 1.21509300  | -0.00273700 | -3.54381400 |
| H  | 0.82915200  | -0.88158600 | -4.04996500 |
| C  | 2.09424300  | 0.85811800  | -4.18372700 |
| H  | 2.41175400  | 0.65437000  | -5.20187200 |
| C  | 2.56300100  | 1.99839500  | -3.51260700 |
| H  | 3.24905900  | 2.67914600  | -4.00798200 |
| C  | 2.13073100  | 2.26566600  | -2.22397100 |
| H  | 2.47331300  | 3.16030400  | -1.71301700 |
| C  | 1.23209700  | 1.41053600  | -1.54170900 |
| C  | 3.47763900  | -1.47927000 | 1.31682100  |
| C  | 3.73860800  | -2.15332200 | 0.03219200  |
| C  | 4.33955000  | -1.22835400 | -0.82437200 |
| C  | 4.48962200  | 0.03634700  | -0.08908500 |
| C  | 4.06770500  | -0.15833200 | 1.25240200  |
| Rh | 2.30567000  | -0.35653100 | -0.05880800 |
| C  | -0.10032500 | -0.83354500 | -1.60886700 |
| O  | -1.14826200 | -1.23438900 | -2.12317500 |
| C  | 4.22994200  | 0.80491700  | 2.38628500  |
| H  | 5.24336100  | 0.73807500  | 2.80108600  |
| H  | 4.06617700  | 1.83577600  | 2.06321000  |
| H  | 3.52614400  | 0.59256800  | 3.19204800  |
| C  | 2.96264900  | -2.15929000 | 2.54486900  |

|   |             |             |             |
|---|-------------|-------------|-------------|
| H | 3.77288300  | -2.68042700 | 3.07153000  |
| H | 2.51908400  | -1.44076600 | 3.23740200  |
| H | 2.19918700  | -2.89661500 | 2.29104500  |
| C | 3.31421800  | -3.55630700 | -0.26911900 |
| H | 3.90096200  | -4.27450900 | 0.31570500  |
| H | 2.25892000  | -3.70147100 | -0.02247500 |
| H | 3.44327800  | -3.79409300 | -1.32669000 |
| C | 4.70800700  | -1.39836300 | -2.26464000 |
| H | 5.79212600  | -1.31366100 | -2.40573600 |
| H | 4.39355800  | -2.37206300 | -2.64506600 |
| H | 4.23318000  | -0.63071300 | -2.88529700 |
| C | 5.14304000  | 1.26069900  | -0.64835800 |
| H | 6.23513600  | 1.15328100  | -0.63634500 |
| H | 4.83388600  | 1.43407400  | -1.68163900 |
| H | 4.88484300  | 2.14744700  | -0.06576800 |
| O | -0.02594300 | -2.44725000 | 0.08656000  |
| C | -1.07333600 | -2.21142600 | 0.91481000  |
| O | -1.51067900 | -1.10784100 | 1.16144900  |
| C | -1.59311100 | -3.51698500 | 1.51596800  |
| C | -1.93019100 | -4.50317800 | 0.37966300  |
| H | -1.04399900 | -4.74770300 | -0.20986600 |
| H | -2.33220400 | -5.42667300 | 0.80901000  |
| H | -2.68283800 | -4.07901900 | -0.28794100 |
| C | -0.49110600 | -4.11220000 | 2.41743100  |
| H | -0.20258300 | -3.41019800 | 3.20686600  |
| H | -0.86358200 | -5.02310300 | 2.89650700  |
| H | 0.39821400  | -4.37145100 | 1.83704600  |
| C | -2.84652300 | -3.20406000 | 2.34341300  |
| H | -2.61933600 | -2.50652200 | 3.15362900  |
| H | -3.62553800 | -2.75702700 | 1.72420000  |
| H | -3.23598900 | -4.12972900 | 2.77881800  |
| C | 1.06917000  | 0.99779300  | 0.80936900  |
| C | 0.71529800  | 1.82496400  | -0.18301300 |
| C | -0.08645800 | 3.13189900  | -0.19541600 |
| O | -1.20001700 | 3.02678100  | -1.05177500 |
| H | -1.75672000 | 2.28224600  | -0.73153800 |
| C | 0.70058300  | 0.96423200  | 2.25776400  |
| H | -0.26492800 | 1.43649200  | 2.44504900  |
| H | 0.63796600  | -0.07067700 | 2.60438400  |
| H | 1.44420200  | 1.48567900  | 2.87028200  |
| H | 0.56251900  | 3.88222800  | -0.67102200 |
| C | -0.40999000 | 3.66163200  | 1.19182900  |
| C | 0.61231000  | 4.22577500  | 1.96355500  |
| C | -1.69979800 | 3.58613200  | 1.72332900  |

|   |             |             |             |
|---|-------------|-------------|-------------|
| C | 0.36259200  | 4.68152800  | 3.25620800  |
| H | 1.61484100  | 4.29607200  | 1.54656900  |
| C | -1.95117600 | 4.03925900  | 3.02011600  |
| H | -2.49632800 | 3.15217700  | 1.13052100  |
| C | -0.92386300 | 4.58328100  | 3.79202500  |
| H | 1.16640300  | 5.11625200  | 3.84405800  |
| H | -2.95553000 | 3.96659500  | 3.42781000  |
| H | -1.12400500 | 4.93537600  | 4.79982300  |
| C | -3.54659600 | 0.47801400  | -1.15383500 |
| H | -2.89215500 | 0.12456400  | -1.95873800 |
| O | -2.73687600 | 1.00129800  | -0.08385200 |
| H | -2.21144400 | 0.26504200  | 0.28894200  |
| C | -4.39197600 | -0.69332600 | -0.67770100 |
| C | -4.31288500 | -1.92661900 | -1.32764200 |
| C | -5.25840600 | -0.53986300 | 0.41021000  |
| C | -5.11703100 | -2.99138000 | -0.91157100 |
| H | -3.60713900 | -2.04942100 | -2.14272400 |
| C | -6.05082100 | -1.60474600 | 0.83277200  |
| H | -5.30138300 | 0.41960600  | 0.91588600  |
| C | -5.98770800 | -2.83287800 | 0.16672300  |
| H | -5.05836900 | -3.94560500 | -1.42751800 |
| H | -6.72127300 | -1.47912200 | 1.67815400  |
| H | -6.60988800 | -3.66154000 | 0.49217900  |
| C | -4.38073100 | 1.57547300  | -1.64670400 |
| C | -5.06183100 | 2.48278900  | -2.06232100 |
| C | -5.87394500 | 3.58545600  | -2.56270300 |
| H | -5.41517300 | 4.54964900  | -2.31695500 |
| H | -5.97925000 | 3.53680600  | -3.65238600 |
| H | -6.88024900 | 3.57268000  | -2.12880800 |

### I-a1i<sub>2a</sub>

|   |             |             |             |
|---|-------------|-------------|-------------|
| N | -0.80098300 | 1.34860700  | -0.52510500 |
| C | -0.08285500 | 0.15523500  | -2.37552800 |
| C | 0.66674200  | -0.05167400 | -3.53551100 |
| H | 1.29559500  | 0.75742500  | -3.89524500 |
| C | 0.59035800  | -1.27829700 | -4.19250600 |
| H | 1.17223400  | -1.45477200 | -5.09197100 |
| C | -0.23172400 | -2.28494700 | -3.67826800 |
| H | -0.28209800 | -3.24978300 | -4.17619500 |
| C | -0.98285500 | -2.06966100 | -2.51904800 |
| H | -1.58837900 | -2.87954900 | -2.12350400 |
| C | -0.92095900 | -0.84111500 | -1.86258500 |
| C | -3.94058900 | 0.59211700  | 0.64245200  |
| C | -3.92757500 | 0.73469300  | -0.79848500 |

|    |             |             |             |
|----|-------------|-------------|-------------|
| C  | -3.94102400 | -0.57229600 | -1.38285400 |
| C  | -3.88241200 | -1.53336600 | -0.31314400 |
| C  | -3.92301900 | -0.80412500 | 0.93300000  |
| Rh | -2.02126800 | -0.27893600 | -0.21559400 |
| C  | -0.03030100 | 1.44778200  | -1.64476100 |
| O  | 0.62759500  | 2.43785400  | -1.98366200 |
| C  | -3.96987500 | -1.45600300 | 2.27949100  |
| H  | -4.89231100 | -2.03795200 | 2.38589000  |
| H  | -3.12699000 | -2.13979100 | 2.41872800  |
| H  | -3.94583200 | -0.72036000 | 3.08486000  |
| C  | -4.01593800 | 1.73193300  | 1.61178200  |
| H  | -5.01361100 | 2.18716100  | 1.60702300  |
| H  | -3.80536800 | 1.40425200  | 2.63178300  |
| H  | -3.29067500 | 2.50669100  | 1.35333500  |
| C  | -3.96418200 | 2.03983300  | -1.53083900 |
| H  | -4.99220100 | 2.41665900  | -1.59749800 |
| H  | -3.35664100 | 2.78792100  | -1.01803400 |
| H  | -3.57634200 | 1.93562700  | -2.54588300 |
| C  | -4.05583800 | -0.87127500 | -2.84339500 |
| H  | -5.11158500 | -0.89784400 | -3.13983300 |
| H  | -3.55163300 | -0.11124600 | -3.44324300 |
| H  | -3.60560400 | -1.83217000 | -3.09396200 |
| C  | -3.96711100 | -3.02374500 | -0.43577900 |
| H  | -5.00118400 | -3.37041800 | -0.31391500 |
| H  | -3.62028500 | -3.36311400 | -1.41360900 |
| H  | -3.35938400 | -3.51775400 | 0.32685900  |
| O  | -1.01888300 | 2.61626100  | 0.08359400  |
| C  | 0.00198800  | 3.04466600  | 0.86347500  |
| O  | 0.88392600  | 2.32295400  | 1.28649100  |
| C  | -0.04529500 | 4.54722500  | 1.11082000  |
| C  | 0.86912800  | 5.14954900  | 0.01445100  |
| H  | 0.50173000  | 4.89185600  | -0.98086300 |
| H  | 0.89957400  | 6.23850100  | 0.12593500  |
| H  | 1.88315600  | 4.75084700  | 0.10194600  |
| C  | -1.46456400 | 5.12270400  | 0.99035400  |
| H  | -2.14221600 | 4.67557900  | 1.72551300  |
| H  | -1.43430600 | 6.20090500  | 1.17628700  |
| H  | -1.87884900 | 4.95810100  | -0.00608400 |
| C  | 0.54002900  | 4.83389500  | 2.50206600  |
| H  | -0.10051900 | 4.42996700  | 3.29361800  |
| H  | 1.52856000  | 4.38244200  | 2.60373500  |
| H  | 0.62407000  | 5.91450700  | 2.65274400  |
| C  | -0.84346300 | -0.64582800 | 1.57929600  |
| C  | -0.53624300 | -1.54325900 | 0.76438700  |

|   |             |             |             |
|---|-------------|-------------|-------------|
| C | 0.34369400  | -2.69234000 | 0.39193000  |
| O | 1.38444300  | -2.31891500 | -0.46995400 |
| H | 1.70639700  | -1.42467900 | -0.21866400 |
| C | -0.80325900 | 0.09119000  | 2.84770800  |
| H | -0.17583000 | -0.47010700 | 3.55009800  |
| H | -0.35832300 | 1.07702800  | 2.70433900  |
| H | -1.79816700 | 0.20905200  | 3.28490600  |
| H | -0.24687300 | -3.45152500 | -0.13442400 |
| C | 0.83249700  | -3.27275400 | 1.71714900  |
| C | 0.17802000  | -4.35853900 | 2.30181300  |
| C | 1.90241500  | -2.66793300 | 2.38780000  |
| C | 0.58242100  | -4.84154500 | 3.54771400  |
| H | -0.64812400 | -4.83256400 | 1.77588100  |
| C | 2.30461100  | -3.14975000 | 3.63264800  |
| H | 2.41379800  | -1.82611400 | 1.93048900  |
| C | 1.64623400  | -4.23536100 | 4.21692200  |
| H | 0.07246700  | -5.69219000 | 3.99092600  |
| H | 3.13749600  | -2.67927700 | 4.14730600  |
| H | 1.96511400  | -4.60990500 | 5.18519100  |
| C | 3.22769100  | 0.86632100  | -0.52625900 |
| H | 2.69271100  | 1.26353900  | -1.39845200 |
| O | 2.27807900  | 0.15941600  | 0.30445100  |
| H | 1.61145800  | 0.80986500  | 0.60782600  |
| C | 4.25052800  | -0.15440300 | -0.99398300 |
| C | 3.88084000  | -1.06028200 | -1.99427700 |
| C | 5.52026200  | -0.24799000 | -0.42032200 |
| C | 4.77042200  | -2.04745900 | -2.41309600 |
| H | 2.88928700  | -1.00405600 | -2.43083800 |
| C | 6.41371300  | -1.23263700 | -0.84340300 |
| H | 5.80433500  | 0.46042500  | 0.35106100  |
| C | 6.04077100  | -2.13480900 | -1.84038300 |
| H | 4.46947400  | -2.74909100 | -3.18542200 |
| H | 7.40039800  | -1.29550300 | -0.39325900 |
| H | 6.73589100  | -2.90225600 | -2.16878200 |
| C | 3.80607400  | 2.00387600  | 0.19733000  |
| C | 4.23049900  | 2.96506200  | 0.79513600  |
| C | 4.73270000  | 4.12734700  | 1.51939800  |
| H | 5.59867600  | 4.56737200  | 1.01205800  |
| H | 3.96496300  | 4.90554800  | 1.59960000  |
| H | 5.04324200  | 3.85983300  | 2.53566400  |

**TS-ali<sub>2a</sub>**

|   |             |             |             |
|---|-------------|-------------|-------------|
| N | -0.84805000 | 1.23716600  | -0.75808300 |
| C | -0.09236900 | -0.48420000 | -2.10935100 |

|    |             |             |             |
|----|-------------|-------------|-------------|
| C  | 0.48655200  | -0.93792700 | -3.29284700 |
| H  | 1.14330900  | -0.26303600 | -3.83328400 |
| C  | 0.19915900  | -2.22049300 | -3.76033300 |
| H  | 0.65359200  | -2.58060100 | -4.67815000 |
| C  | -0.68389800 | -3.03779800 | -3.04793700 |
| H  | -0.91571200 | -4.03448700 | -3.41298500 |
| C  | -1.25709000 | -2.58796200 | -1.85859100 |
| H  | -1.90633300 | -3.24802800 | -1.29077700 |
| C  | -0.96208900 | -1.30852900 | -1.36493100 |
| C  | -4.04361900 | 1.09785600  | 0.40522600  |
| C  | -4.02829300 | 0.97066800  | -1.05282700 |
| C  | -4.20481500 | -0.39453600 | -1.38612200 |
| C  | -4.27564800 | -1.14141000 | -0.14472700 |
| C  | -4.25149200 | -0.20545100 | 0.94650100  |
| Rh | -2.28930200 | -0.11948500 | -0.16420100 |
| C  | 0.10030700  | 0.92903100  | -1.67203900 |
| O  | 0.97615300  | 1.68988600  | -2.10923200 |
| C  | -4.44888800 | -0.56260500 | 2.38660000  |
| H  | -5.51304900 | -0.72829500 | 2.59482900  |
| H  | -3.91475900 | -1.47919100 | 2.65105800  |
| H  | -4.10456700 | 0.23356300  | 3.04939100  |
| C  | -3.98303600 | 2.39693500  | 1.14855700  |
| H  | -4.94705200 | 2.91994500  | 1.11138700  |
| H  | -3.72670900 | 2.24207200  | 2.19939500  |
| H  | -3.22582300 | 3.05412500  | 0.71551200  |
| C  | -3.87023900 | 2.12535100  | -1.99230100 |
| H  | -4.80945500 | 2.68580800  | -2.07508600 |
| H  | -3.09608500 | 2.80894800  | -1.63727800 |
| H  | -3.58522500 | 1.79249600  | -2.99202200 |
| C  | -4.27468000 | -0.98942400 | -2.75722400 |
| H  | -5.30053800 | -1.28994200 | -3.00181000 |
| H  | -3.94366700 | -0.27572400 | -3.51393600 |
| H  | -3.63467700 | -1.87232400 | -2.84033500 |
| C  | -4.53593900 | -2.61127100 | -0.02014000 |
| H  | -5.60878500 | -2.80994000 | 0.09850400  |
| H  | -4.19803000 | -3.14851400 | -0.90846600 |
| H  | -4.02347200 | -3.03418100 | 0.84804300  |
| O  | -0.78830600 | 2.59169100  | -0.33674900 |
| C  | 0.23221800  | 2.88510300  | 0.50329600  |
| O  | 0.91271500  | 2.05059300  | 1.06825300  |
| C  | 0.46964900  | 4.38653800  | 0.61007700  |
| C  | 1.44764600  | 4.71785700  | -0.54519400 |
| H  | 1.01955900  | 4.43768500  | -1.50986400 |
| H  | 1.66073200  | 5.79212800  | -0.54017100 |

|   |             |             |             |
|---|-------------|-------------|-------------|
| H | 2.38434600  | 4.16727400  | -0.42521400 |
| C | -0.82924400 | 5.19327300  | 0.45398400  |
| H | -1.55435300 | 4.93700300  | 1.23389200  |
| H | -0.60580900 | 6.26120000  | 0.54217400  |
| H | -1.29337500 | 5.01977300  | -0.51883700 |
| C | 1.13504100  | 4.68316200  | 1.96185900  |
| H | 0.45603700  | 4.47220600  | 2.79478200  |
| H | 2.02806200  | 4.06934400  | 2.09008300  |
| H | 1.41515800  | 5.74005800  | 2.01098900  |
| C | -1.00410400 | -0.58805600 | 1.36238000  |
| C | -0.49688300 | -1.47609900 | 0.58830300  |
| C | 0.43962000  | -2.66933000 | 0.60991400  |
| O | 1.52069200  | -2.54312200 | -0.26450400 |
| H | 1.91608600  | -1.65216500 | -0.14100100 |
| C | -0.89036500 | -0.03201500 | 2.72937600  |
| H | -0.25280500 | -0.66445700 | 3.35446600  |
| H | -0.44036400 | 0.96256900  | 2.66871800  |
| H | -1.87128600 | 0.06309600  | 3.20116500  |
| H | -0.11999900 | -3.55361000 | 0.28646600  |
| C | 0.83214700  | -2.85861400 | 2.07357000  |
| C | 0.01606300  | -3.62753200 | 2.90914700  |
| C | 1.95599500  | -2.22078500 | 2.60761900  |
| C | 0.31276400  | -3.76048500 | 4.26492800  |
| H | -0.85761700 | -4.12400900 | 2.49241600  |
| C | 2.25232200  | -2.35396200 | 3.96514000  |
| H | 2.58171900  | -1.60713400 | 1.96888100  |
| C | 1.43408900  | -3.12012100 | 4.79725500  |
| H | -0.32502500 | -4.36532800 | 4.90316100  |
| H | 3.12550900  | -1.85352000 | 4.37347000  |
| H | 1.66975900  | -3.22148000 | 5.85255100  |
| C | 3.46280000  | 0.65680400  | -0.57986400 |
| H | 2.91858500  | 1.07351900  | -1.43683400 |
| O | 2.50281900  | -0.03004600 | 0.25476000  |
| H | 1.82443600  | 0.62159500  | 0.52737100  |
| C | 4.44672300  | -0.38607600 | -1.08058100 |
| C | 3.98166500  | -1.35578900 | -1.97756800 |
| C | 5.77771300  | -0.42590400 | -0.66216300 |
| C | 4.83530800  | -2.35321300 | -2.44211500 |
| H | 2.94488300  | -1.33909800 | -2.29670600 |
| C | 6.63646700  | -1.42023700 | -1.13423100 |
| H | 6.13668700  | 0.32905900  | 0.02963900  |
| C | 6.16752300  | -2.38662900 | -2.02375800 |
| H | 4.45981800  | -3.10452900 | -3.13056500 |
| H | 7.67105300  | -1.44041800 | -0.80362500 |



|   |            |             |             |
|---|------------|-------------|-------------|
| H | 6.83490700 | -3.16196400 | -2.38891700 |
| C | 4.07958900 | 1.76950700  | 0.15052200  |
| C | 4.53846700 | 2.71873600  | 0.74323200  |
| C | 5.08899300 | 3.86575600  | 1.45738400  |
| H | 6.05768500 | 4.16359400  | 1.04069800  |
| H | 4.41893500 | 4.73051800  | 1.39339100  |
| H | 5.23927300 | 3.63829500  | 2.51868500  |

**H-a1<sub>2a</sub>**

|    |             |             |             |
|----|-------------|-------------|-------------|
| N  | -0.62427800 | 1.15140400  | -0.62992100 |
| C  | -0.68946800 | -0.61217000 | -2.13640500 |
| C  | -1.13783000 | -0.66045200 | -3.46859400 |
| H  | -0.88100800 | 0.16787400  | -4.12033500 |
| C  | -1.87671600 | -1.73698600 | -3.93692900 |
| H  | -2.21460900 | -1.75665200 | -4.96865200 |
| C  | -2.18102600 | -2.80164400 | -3.07456700 |
| H  | -2.75837000 | -3.64795600 | -3.43477400 |
| C  | -1.71962900 | -2.78077400 | -1.76821500 |
| H  | -1.92325100 | -3.61741500 | -1.10658600 |
| C  | -0.95786200 | -1.70154600 | -1.25860200 |
| C  | -3.59814600 | 1.31478100  | 1.08227600  |
| C  | -3.95728000 | 1.61609500  | -0.31392500 |
| C  | -4.41110200 | 0.43314400  | -0.90176900 |
| C  | -4.37262900 | -0.62849800 | 0.11652800  |
| C  | -3.98553400 | -0.05332200 | 1.35706700  |
| Rh | -2.27804200 | 0.06450300  | -0.02308600 |
| C  | -0.00750100 | 0.68358700  | -1.72657700 |
| O  | 0.87465200  | 1.22490900  | -2.40239000 |
| C  | -4.00760000 | -0.72006200 | 2.69569800  |
| H  | -5.00815100 | -0.64412900 | 3.13942600  |
| H  | -3.75388400 | -1.77964100 | 2.61769100  |
| H  | -3.30078200 | -0.25598300 | 3.38484200  |
| C  | -3.16584900 | 2.33426300  | 2.08672200  |
| H  | -4.03091600 | 2.87234600  | 2.49574600  |
| H  | -2.63311800 | 1.86890800  | 2.91845600  |
| H  | -2.50103000 | 3.06980200  | 1.62905900  |
| C  | -3.74727900 | 2.95098100  | -0.95765500 |
| H  | -4.44974200 | 3.69255000  | -0.55900300 |
| H  | -2.73287300 | 3.31320400  | -0.77099800 |
| H  | -3.88718000 | 2.89845000  | -2.03901900 |
| C  | -4.78491900 | 0.19272600  | -2.32993300 |
| H  | -5.82825600 | -0.13341700 | -2.41251200 |
| H  | -4.66284800 | 1.09429100  | -2.93295100 |
| H  | -4.15698800 | -0.58971600 | -2.76996200 |

|   |             |             |             |
|---|-------------|-------------|-------------|
| C | -4.84325900 | -2.03166500 | -0.10726700 |
| H | -5.93722600 | -2.09013800 | -0.04139100 |
| H | -4.54717800 | -2.39215100 | -1.09504300 |
| H | -4.42368800 | -2.71078100 | 0.63816300  |
| O | -0.32696900 | 2.51111900  | -0.34610100 |
| C | 0.54715000  | 2.71890200  | 0.66533500  |
| O | 0.98560300  | 1.83880600  | 1.37876600  |
| C | 0.94145800  | 4.19226600  | 0.74679000  |
| C | 1.86780700  | 4.46529100  | -0.46335300 |
| H | 1.37601400  | 4.20230900  | -1.40257100 |
| H | 2.13132000  | 5.52796200  | -0.48376000 |
| H | 2.78985900  | 3.88374500  | -0.38127900 |
| C | -0.30118300 | 5.09786400  | 0.67243200  |
| H | -0.99213900 | 4.89413100  | 1.49770600  |
| H | 0.00809000  | 6.14500300  | 0.74809700  |
| H | -0.83612100 | 4.96612300  | -0.27039400 |
| C | 1.70450100  | 4.42370900  | 2.05720900  |
| H | 1.06332500  | 4.25179800  | 2.92718900  |
| H | 2.55638800  | 3.74498700  | 2.12660500  |
| H | 2.06448300  | 5.45680000  | 2.09430100  |
| C | -0.88113900 | -0.97709400 | 1.02295700  |
| C | -0.37138000 | -1.83258300 | 0.12926000  |
| C | 0.71432200  | -2.90928800 | 0.23381900  |
| O | 1.80088900  | -2.57857900 | -0.60208700 |
| H | 2.11294300  | -1.68537300 | -0.34129400 |
| C | -0.55981800 | -0.72808100 | 2.46125700  |
| H | 0.46605300  | -1.00814300 | 2.70684300  |
| H | -0.68264600 | 0.33202200  | 2.69531600  |
| H | -1.21857300 | -1.30731200 | 3.11736900  |
| H | 0.28862700  | -3.82371000 | -0.20481200 |
| C | 1.10416800  | -3.24761400 | 1.66278400  |
| C | 0.19438700  | -3.92975000 | 2.47911900  |
| C | 2.34606500  | -2.88208200 | 2.18647800  |
| C | 0.50424100  | -4.21734100 | 3.80645700  |
| H | -0.76947000 | -4.22443500 | 2.06939800  |
| C | 2.65661300  | -3.16555700 | 3.51826100  |
| H | 3.05339600  | -2.35769900 | 1.55563400  |
| C | 1.73849400  | -3.82835100 | 4.33330900  |
| H | -0.21240900 | -4.74556200 | 4.42938800  |
| H | 3.62133700  | -2.86726000 | 3.91883900  |
| H | 1.98374800  | -4.04785300 | 5.36837600  |
| C | 3.39301000  | 0.71665700  | -0.47916800 |
| H | 2.71486700  | 1.29509000  | -1.11731600 |
| O | 2.60686000  | -0.14369600 | 0.37118500  |

|   |            |             |             |
|---|------------|-------------|-------------|
| H | 1.91339700 | 0.40347300  | 0.78888800  |
| C | 4.21894300 | -0.18750500 | -1.37365100 |
| C | 3.71054500 | -0.54938100 | -2.62528500 |
| C | 5.43186100 | -0.72568600 | -0.93501400 |
| C | 4.41753000 | -1.44110200 | -3.43200300 |
| H | 2.76198700 | -0.13191700 | -2.95074500 |
| C | 6.13594600 | -1.61743000 | -1.74231000 |
| H | 5.82099300 | -0.43396000 | 0.03575900  |
| C | 5.62935800 | -1.97623000 | -2.99318600 |
| H | 4.01969900 | -1.72000200 | -4.40341600 |
| H | 7.07863400 | -2.03241000 | -1.39710600 |
| H | 6.17788500 | -2.67116600 | -3.62271400 |
| C | 4.20151100 | 1.64356800  | 0.32466300  |
| C | 4.84285700 | 2.43159700  | 0.98166400  |
| C | 5.62175400 | 3.37802300  | 1.77302800  |
| H | 6.52222100 | 3.69593700  | 1.23568300  |
| H | 5.03809700 | 4.27555500  | 2.00725000  |
| H | 5.94043200 | 2.93192800  | 2.72172300  |

**I-b1<sub>2a</sub>**

|    |             |             |             |
|----|-------------|-------------|-------------|
| N  | 0.63303500  | 0.47718800  | -1.11291000 |
| C  | 0.30964300  | 2.59441300  | -0.20566300 |
| C  | -0.25326000 | 3.87034000  | -0.13256900 |
| H  | -0.88587400 | 4.20650400  | -0.94586300 |
| C  | 0.00504000  | 4.67481800  | 0.97436800  |
| H  | -0.43693800 | 5.66372700  | 1.04591000  |
| C  | 0.82812100  | 4.19666000  | 1.99781400  |
| H  | 1.02776900  | 4.81695500  | 2.86800400  |
| C  | 1.39752200  | 2.92174600  | 1.91506100  |
| H  | 2.02454000  | 2.56547500  | 2.72727300  |
| C  | 1.14919900  | 2.11197400  | 0.80580200  |
| C  | 3.69496900  | -0.86811500 | -0.53013900 |
| C  | 3.80504100  | 0.55780600  | -0.77249500 |
| C  | 4.02928000  | 1.21076400  | 0.48615200  |
| C  | 3.95815700  | 0.21803200  | 1.51952600  |
| C  | 3.79680800  | -1.06618300 | 0.87436100  |
| Rh | 1.97443300  | 0.26023700  | 0.44307100  |
| C  | 0.06953700  | 1.70174900  | -1.36779500 |
| O  | -0.55589800 | 2.00058400  | -2.39001000 |
| C  | 3.84681300  | -2.38045500 | 1.58566700  |
| H  | 4.87055200  | -2.57761400 | 1.92656900  |
| H  | 3.20253100  | -2.38723900 | 2.46919600  |
| H  | 3.54991600  | -3.19980300 | 0.92943700  |
| C  | 3.53773900  | -1.94244900 | -1.56396000 |

|   |             |             |             |
|---|-------------|-------------|-------------|
| H | 4.44212300  | -2.55950400 | -1.62556700 |
| H | 2.68340300  | -2.58372700 | -1.33159900 |
| H | 3.36285200  | -1.50516600 | -2.54697700 |
| C | 3.79195900  | 1.22656700  | -2.11220600 |
| H | 4.80187700  | 1.26441900  | -2.53839400 |
| H | 3.14346300  | 0.69355500  | -2.80881100 |
| H | 3.41972700  | 2.25034800  | -2.03319500 |
| C | 4.36297100  | 2.65755900  | 0.66073400  |
| H | 5.43995900  | 2.80539300  | 0.51267100  |
| H | 3.83185400  | 3.28159600  | -0.06001100 |
| H | 4.10633700  | 3.01647900  | 1.65768400  |
| C | 4.19905000  | 0.41888100  | 2.98363700  |
| H | 5.24635800  | 0.22105200  | 3.24545100  |
| H | 3.97203500  | 1.44290200  | 3.28819700  |
| H | 3.57536000  | -0.25365000 | 3.57856600  |
| O | 0.78374700  | -0.26348300 | -2.32617500 |
| C | -0.28193600 | -1.00557000 | -2.65951400 |
| O | -1.20365400 | -1.25280300 | -1.89383700 |
| C | -0.25091600 | -1.47764100 | -4.10650500 |
| C | -0.81006300 | -2.90876100 | -4.16081700 |
| H | -1.80271300 | -2.95227600 | -3.70890600 |
| H | -0.87964400 | -3.23896900 | -5.20178400 |
| H | -0.15916000 | -3.60535200 | -3.62228100 |
| C | -1.19066000 | -0.50068600 | -4.85597200 |
| H | -0.85746000 | 0.53209800  | -4.72640900 |
| H | -1.19838300 | -0.74923600 | -5.92209900 |
| H | -2.21040800 | -0.57949300 | -4.47040000 |
| C | 1.15582800  | -1.42438700 | -4.71960000 |
| H | 1.56017000  | -0.41004500 | -4.70789200 |
| H | 1.84762600  | -2.08116900 | -4.18470100 |
| H | 1.10707800  | -1.76195000 | -5.75956600 |
| C | 0.68027600  | -1.29270000 | 1.27888400  |
| C | 0.42607700  | -0.27705900 | 1.95867200  |
| C | -0.34851900 | 0.50480000  | 2.93059600  |
| C | 0.51263500  | -2.73459000 | 0.94083700  |
| H | 1.39452700  | -3.27822500 | 1.28699700  |
| H | 0.28450400  | 1.11260300  | 3.58021100  |
| O | 0.46236000  | -2.99134700 | -0.45545800 |
| H | -0.29730800 | -2.50152100 | -0.81719600 |
| C | -0.69782300 | -3.29725500 | 1.67801000  |
| C | -0.60228700 | -4.55448000 | 2.28358600  |
| C | -1.91403600 | -2.60424400 | 1.72188200  |
| C | -1.70426100 | -5.11804800 | 2.92675100  |
| H | 0.33960600  | -5.09646400 | 2.24606900  |

|   |             |             |             |
|---|-------------|-------------|-------------|
| C | -3.01399700 | -3.16777700 | 2.36847100  |
| H | -2.01186800 | -1.62457400 | 1.26643900  |
| C | -2.91427200 | -4.42308000 | 2.97163800  |
| H | -1.61727700 | -6.09454500 | 3.39425500  |
| H | -3.94619200 | -2.61275200 | 2.39887900  |
| H | -3.77205300 | -4.85618100 | 3.47814800  |
| H | -1.03804400 | 1.16061500  | 2.39355300  |
| H | -0.93322600 | -0.19261800 | 3.54039000  |
| C | -3.27474300 | 0.56601400  | -0.50570600 |
| H | -2.99866200 | 0.63804800  | -1.56429700 |
| O | -2.07942600 | 0.36310900  | 0.26129700  |
| H | -1.45992500 | -0.11500600 | -0.32003500 |
| C | -3.86611400 | 1.89627700  | -0.08265900 |
| C | -3.50819000 | 3.04904200  | -0.78765300 |
| C | -4.69292100 | 2.00263000  | 1.03831800  |
| C | -3.97263800 | 4.29729100  | -0.37368000 |
| H | -2.84717200 | 2.95844200  | -1.64521800 |
| C | -5.15460300 | 3.25094000  | 1.45509400  |
| H | -4.97621500 | 1.10100700  | 1.57305000  |
| C | -4.79574200 | 4.40118700  | 0.74904100  |
| H | -3.69266400 | 5.18906200  | -0.92760800 |
| H | -5.79732200 | 3.32692900  | 2.32766400  |
| H | -5.15902900 | 5.37303800  | 1.07094500  |
| C | -4.19300500 | -0.57185600 | -0.34449300 |
| C | -4.89267600 | -1.55077200 | -0.22037200 |
| C | -5.71948500 | -2.74513200 | -0.08640300 |
| H | -6.59828700 | -2.55939900 | 0.54174500  |
| H | -6.07613000 | -3.09197300 | -1.06275500 |
| H | -5.14705100 | -3.56076300 | 0.36971600  |

**TS-b1<sub>2a</sub>**

|   |             |             |             |
|---|-------------|-------------|-------------|
| N | -0.68289400 | -0.01825000 | -1.29344800 |
| C | -0.39821100 | -2.29938400 | -0.96584100 |
| C | -0.07204500 | -3.57425400 | -1.42331800 |
| H | 0.56050200  | -3.66025800 | -2.30080000 |
| C | -0.58490200 | -4.69924300 | -0.77450100 |
| H | -0.33032200 | -5.69352900 | -1.12855700 |
| C | -1.43439900 | -4.54494700 | 0.32583900  |
| H | -1.84126600 | -5.41962000 | 0.82575400  |
| C | -1.74459600 | -3.26866300 | 0.79783600  |
| H | -2.35909200 | -3.15339000 | 1.68625900  |
| C | -1.22714700 | -2.12996100 | 0.16324400  |
| C | -3.65832800 | 1.33876500  | -0.42418200 |
| C | -3.88834800 | 0.17820800  | -1.28818800 |

|    |             |             |             |
|----|-------------|-------------|-------------|
| C  | -4.28748800 | -0.90927600 | -0.47533400 |
| C  | -4.26755000 | -0.46020900 | 0.90521000  |
| C  | -3.95258300 | 0.94509400  | 0.91354100  |
| Rh | -2.19540100 | -0.21026000 | 0.12951900  |
| C  | 0.00799000  | -1.09271600 | -1.75055700 |
| O  | 0.81796800  | -1.11184700 | -2.68753700 |
| C  | -3.98280900 | 1.84886200  | 2.10568300  |
| H  | -4.97089100 | 2.31757700  | 2.19399900  |
| H  | -3.79939900 | 1.29600300  | 3.03004100  |
| H  | -3.23367200 | 2.63720300  | 2.01799400  |
| C  | -3.30504400 | 2.71728500  | -0.88824600 |
| H  | -4.20543500 | 3.30077800  | -1.11979800 |
| H  | -2.73482000 | 3.24487500  | -0.12090200 |
| H  | -2.69502700 | 2.67262900  | -1.79230200 |
| C  | -3.73569100 | 0.18819700  | -2.77693500 |
| H  | -4.62019700 | 0.63063600  | -3.25137500 |
| H  | -2.86328400 | 0.77261200  | -3.07521000 |
| H  | -3.60874200 | -0.82140000 | -3.17261200 |
| C  | -4.64295400 | -2.28992100 | -0.93000000 |
| H  | -5.72854900 | -2.44231900 | -0.90079000 |
| H  | -4.30521600 | -2.46748300 | -1.95274000 |
| H  | -4.17791000 | -3.04984300 | -0.29654800 |
| C  | -4.70993300 | -1.26534700 | 2.08845500  |
| H  | -5.77755700 | -1.11056100 | 2.29042400  |
| H  | -4.56048400 | -2.33314300 | 1.91584300  |
| H  | -4.15904800 | -0.98870800 | 2.99115100  |
| O  | -0.50553200 | 1.10634800  | -2.15655200 |
| C  | 0.36986800  | 2.02269200  | -1.72459000 |
| O  | 0.84192100  | 2.02721900  | -0.59603700 |
| C  | 0.77706500  | 3.00071600  | -2.81786900 |
| C  | 1.29485100  | 4.28974600  | -2.16524200 |
| H  | 2.09763200  | 4.06531300  | -1.46035800 |
| H  | 1.67733400  | 4.96410700  | -2.93741100 |
| H  | 0.49872600  | 4.80927200  | -1.62203100 |
| C  | 1.92801400  | 2.28622300  | -3.57327100 |
| H  | 1.60437500  | 1.30893900  | -3.94029900 |
| H  | 2.24122500  | 2.90465900  | -4.42060900 |
| H  | 2.78765800  | 2.14194900  | -2.91268300 |
| C  | -0.38099000 | 3.29846700  | -3.78380700 |
| H  | -0.73827600 | 2.38896000  | -4.27041300 |
| H  | -1.22228100 | 3.76972600  | -3.26523700 |
| H  | -0.03546800 | 3.99059100  | -4.55778000 |
| C  | -0.84635100 | 0.24852600  | 1.60475700  |
| C  | -0.42196300 | -0.95822100 | 1.61870800  |

|   |             |             |             |
|---|-------------|-------------|-------------|
| C | 0.52432400  | -1.90720100 | 2.25077600  |
| C | -0.63109400 | 1.52417200  | 2.37735500  |
| H | -1.43337200 | 1.58441600  | 3.12102900  |
| H | 0.00742800  | -2.72576400 | 2.75788700  |
| O | -0.78341300 | 2.67584000  | 1.56700600  |
| H | -0.23040400 | 2.53820000  | 0.77739000  |
| C | 0.69119500  | 1.46036300  | 3.12852800  |
| C | 0.70203000  | 0.99979000  | 4.44899400  |
| C | 1.90441500  | 1.76487200  | 2.50265100  |
| C | 1.90561200  | 0.83384900  | 5.13560100  |
| H | -0.23929500 | 0.76242400  | 4.93986600  |
| C | 3.10720500  | 1.59289100  | 3.18481800  |
| H | 1.92221000  | 2.11845500  | 1.48011300  |
| C | 3.11361500  | 1.12658900  | 4.50060500  |
| H | 1.89908500  | 0.47676900  | 6.16137600  |
| H | 4.03987500  | 1.80045900  | 2.66996200  |
| H | 4.05333700  | 0.98955100  | 5.02745200  |
| H | 1.21179900  | -2.31167100 | 1.50625000  |
| H | 1.10258200  | -1.33215400 | 2.98115700  |
| C | 3.20237300  | -0.18022700 | -0.77153200 |
| H | 2.73653200  | -0.10515900 | -1.76260200 |
| O | 2.18147500  | -0.40259100 | 0.20519000  |
| H | 1.51106400  | 0.28942200  | 0.07959800  |
| C | 4.08063500  | -1.41652900 | -0.77099600 |
| C | 3.69421200  | -2.50489900 | -1.56097900 |
| C | 5.20650400  | -1.52204000 | 0.04766900  |
| C | 4.43261300  | -3.68727700 | -1.53175200 |
| H | 2.81224200  | -2.40625400 | -2.18746400 |
| C | 5.94548200  | -2.70520500 | 0.07601500  |
| H | 5.50118700  | -0.67182800 | 0.65518900  |
| C | 5.55987700  | -3.79003100 | -0.71337600 |
| H | 4.13138600  | -4.52828500 | -2.15022700 |
| H | 6.82228700  | -2.78055100 | 0.71306100  |
| H | 6.13700500  | -4.71023400 | -0.69301900 |
| C | 3.92520300  | 1.07438300  | -0.50203600 |
| C | 4.43404400  | 2.14910600  | -0.27624000 |
| C | 5.04133500  | 3.44523300  | 0.00853600  |
| H | 6.13550700  | 3.38696600  | -0.00267800 |
| H | 4.74018900  | 4.19692700  | -0.72991700 |
| H | 4.73658600  | 3.81158300  | 0.99562400  |

**II-b1<sub>2a</sub>**

|   |            |            |             |
|---|------------|------------|-------------|
| N | 0.22563100 | 0.49321500 | -0.82074700 |
| C | 0.71644700 | 2.31775500 | 0.61411600  |

|    |             |             |             |
|----|-------------|-------------|-------------|
| C  | 1.19540800  | 3.63718600  | 0.46251700  |
| H  | 0.90376100  | 4.16796300  | -0.43655200 |
| C  | 1.99018700  | 4.23553200  | 1.42429500  |
| H  | 2.34435000  | 5.25209000  | 1.28320200  |
| C  | 2.32642300  | 3.52180100  | 2.58586600  |
| H  | 2.94994600  | 3.97890100  | 3.34854000  |
| C  | 1.83776200  | 2.24004300  | 2.76745000  |
| H  | 2.07029700  | 1.69804900  | 3.67876700  |
| C  | 1.01201300  | 1.59649600  | 1.81045000  |
| C  | 3.34415100  | -1.04619300 | -1.28720300 |
| C  | 3.55131600  | 0.31941800  | -1.78222600 |
| C  | 4.11485200  | 1.06631200  | -0.74188100 |
| C  | 4.29806300  | 0.18161700  | 0.41822500  |
| C  | 3.92182000  | -1.13662400 | 0.03902700  |
| Rh | 2.13620300  | 0.14170800  | 0.02305400  |
| C  | -0.05292000 | 1.80966400  | -0.59344500 |
| O  | -0.72777700 | 2.56344200  | -1.29353800 |
| C  | 4.13705200  | -2.39819500 | 0.81083200  |
| H  | 5.09451700  | -2.84922400 | 0.52061200  |
| H  | 4.17354200  | -2.20668500 | 1.88546000  |
| H  | 3.33815800  | -3.11248100 | 0.60960900  |
| C  | 2.89183400  | -2.19690300 | -2.12552400 |
| H  | 3.74412900  | -2.62217800 | -2.67210500 |
| H  | 2.44397800  | -2.97242400 | -1.50480500 |
| H  | 2.15391900  | -1.87669000 | -2.86384400 |
| C  | 3.15622200  | 0.78913300  | -3.14695100 |
| H  | 3.78914600  | 0.32800500  | -3.91442000 |
| H  | 2.11977400  | 0.52455500  | -3.36580700 |
| H  | 3.24911100  | 1.87292400  | -3.23967800 |
| C  | 4.45508900  | 2.52121000  | -0.73127200 |
| H  | 5.54245800  | 2.65993000  | -0.69799100 |
| H  | 4.07357600  | 3.03106700  | -1.61756600 |
| H  | 4.03213200  | 3.01899900  | 0.14641800  |
| C  | 4.93686800  | 0.60031000  | 1.70507900  |
| H  | 6.02792300  | 0.65290200  | 1.59943300  |
| H  | 4.58261100  | 1.58624900  | 2.01636600  |
| H  | 4.70831200  | -0.10592800 | 2.50595100  |
| O  | -0.14427700 | 0.18586400  | -2.17058900 |
| C  | -0.64655400 | -1.04382400 | -2.37476300 |
| O  | -0.68005600 | -1.92555800 | -1.53773800 |
| C  | -1.18596700 | -1.16880200 | -3.80201000 |
| C  | -1.66407700 | -2.60911400 | -4.02055500 |
| H  | -2.43778900 | -2.87509300 | -3.29849500 |
| H  | -2.07595900 | -2.70882400 | -5.02945400 |



|   |             |             |             |
|---|-------------|-------------|-------------|
| H | -0.84276100 | -3.32239000 | -3.90821200 |
| C | -2.36268100 | -0.17908700 | -3.95502700 |
| H | -2.03684700 | 0.84639200  | -3.76562500 |
| H | -2.75823800 | -0.24100100 | -4.97399100 |
| H | -3.16781100 | -0.42250000 | -3.25689600 |
| C | -0.08019100 | -0.81355700 | -4.81587500 |
| H | 0.24439200  | 0.22289700  | -4.70175700 |
| H | 0.79073300  | -1.46886200 | -4.70693500 |
| H | -0.46641200 | -0.94053100 | -5.83209200 |
| C | 0.99506600  | -0.76316600 | 1.46787800  |
| C | 0.47927600  | 0.23327500  | 2.20246800  |
| C | -0.45434800 | 0.21908600  | 3.39429700  |
| C | 0.86143200  | -2.26552800 | 1.61453600  |
| H | 1.70051500  | -2.60388900 | 2.23652700  |
| H | -0.11064900 | 0.92787900  | 4.15562000  |
| O | 1.03700300  | -2.93499300 | 0.36825000  |
| H | 0.42762400  | -2.52314700 | -0.27368100 |
| C | -0.42030000 | -2.71884700 | 2.29074200  |
| C | -0.38130800 | -3.35085900 | 3.53635600  |
| C | -1.65953500 | -2.49488400 | 1.68063500  |
| C | -1.56169200 | -3.72887500 | 4.17983000  |
| H | 0.57903100  | -3.53555800 | 4.01223700  |
| C | -2.83850000 | -2.86247700 | 2.32294600  |
| H | -1.70908600 | -2.02812300 | 0.70532200  |
| C | -2.79445500 | -3.47712900 | 3.57692000  |
| H | -1.51742300 | -4.21551800 | 5.15006100  |
| H | -3.78891000 | -2.64578000 | 1.84606300  |
| H | -3.71488500 | -3.75792000 | 4.08055000  |
| H | -1.45418400 | 0.53397600  | 3.07608500  |
| H | -0.53540400 | -0.76601500 | 3.84821400  |
| C | -3.19384400 | 0.68421100  | -0.28504000 |
| H | -2.61061400 | 1.04543700  | -1.14248900 |
| O | -2.33874500 | 0.62310300  | 0.86383500  |
| H | -1.52390500 | 0.16678900  | 0.59612000  |
| C | -4.25978100 | 1.72480900  | 0.00306100  |
| C | -3.88977100 | 3.07409000  | -0.05534200 |
| C | -5.56416900 | 1.38145100  | 0.35924100  |
| C | -4.82136600 | 4.06680300  | 0.24090100  |
| H | -2.87192100 | 3.32866200  | -0.33734300 |
| C | -6.49748300 | 2.37697800  | 0.65441300  |
| H | -5.84461200 | 0.33348800  | 0.39688400  |
| C | -6.12788200 | 3.72068000  | 0.59641300  |
| H | -4.53094300 | 5.11240500  | 0.19034200  |
| H | -7.51196500 | 2.10233700  | 0.92928200  |

|   |             |             |             |
|---|-------------|-------------|-------------|
| H | -6.85441700 | 4.49574000  | 0.82361200  |
| C | -3.71771700 | -0.65113400 | -0.61348600 |
| C | -4.03996300 | -1.78941800 | -0.86784500 |
| C | -4.37576800 | -3.18005600 | -1.15225400 |
| H | -5.16927200 | -3.54590300 | -0.49153700 |
| H | -4.71708300 | -3.30712100 | -2.18562000 |
| H | -3.49664200 | -3.81721400 | -1.00509500 |

**I-b1i<sub>2a</sub>**

|    |             |             |             |
|----|-------------|-------------|-------------|
| N  | -0.71734200 | 0.59580500  | -1.13086700 |
| C  | -0.74575600 | -1.56185300 | -1.97749600 |
| C  | -0.34650600 | -2.58764300 | -2.83513200 |
| H  | 0.35359100  | -2.35368300 | -3.63083200 |
| C  | -0.84937900 | -3.87397600 | -2.64970500 |
| H  | -0.54527200 | -4.68060200 | -3.30994500 |
| C  | -1.74662100 | -4.11872300 | -1.60666100 |
| H  | -2.14194700 | -5.12005400 | -1.45448700 |
| C  | -2.13681200 | -3.08625200 | -0.74614100 |
| H  | -2.81294700 | -3.30855300 | 0.07427700  |
| C  | -1.64058700 | -1.79437600 | -0.92474600 |
| C  | -3.46907900 | 1.65424400  | 0.51637600  |
| C  | -3.84293700 | 0.92028200  | -0.67948800 |
| C  | -4.29882500 | -0.38087100 | -0.28503700 |
| C  | -4.12068000 | -0.49949300 | 1.13485000  |
| C  | -3.65141200 | 0.78017900  | 1.62291200  |
| Rh | -2.10516800 | -0.13517800 | 0.21171700  |
| C  | -0.25594100 | -0.17173700 | -2.15790200 |
| O  | 0.46842100  | 0.22327200  | -3.08051300 |
| C  | -3.47492200 | 1.11709400  | 3.06903700  |
| H  | -4.45490000 | 1.20982800  | 3.55249600  |
| H  | -2.92139300 | 0.33477000  | 3.59555400  |
| H  | -2.94653300 | 2.06290400  | 3.19563500  |
| C  | -3.03140100 | 3.08594500  | 0.57079600  |
| H  | -3.87709000 | 3.74315600  | 0.80860400  |
| H  | -2.24604000 | 3.23132500  | 1.31510600  |
| H  | -2.62281800 | 3.39754500  | -0.39124700 |
| C  | -3.83770700 | 1.46600700  | -2.07360800 |
| H  | -4.77794700 | 1.98734200  | -2.29082400 |
| H  | -3.01478700 | 2.16878400  | -2.21269800 |
| H  | -3.71594500 | 0.66606200  | -2.80680000 |
| C  | -4.91530900 | -1.39618700 | -1.19321400 |
| H  | -5.98818000 | -1.19341800 | -1.29985200 |
| H  | -4.46398100 | -1.37123500 | -2.18653100 |
| H  | -4.80039700 | -2.40910300 | -0.80666500 |

|   |             |             |             |
|---|-------------|-------------|-------------|
| C | -4.52360800 | -1.65440100 | 1.99867300  |
| H | -5.54390100 | -1.52694000 | 2.38218800  |
| H | -4.49529400 | -2.59492900 | 1.44414900  |
| H | -3.85510500 | -1.75221900 | 2.85781300  |
| O | -0.56365000 | 1.98378000  | -1.42468100 |
| C | 0.67341600  | 2.45787500  | -1.22174200 |
| O | 1.52378600  | 1.87236400  | -0.56209100 |
| C | 0.92503100  | 3.79980300  | -1.89388300 |
| C | 1.64073200  | 4.71418700  | -0.88364800 |
| H | 2.54506500  | 4.23474400  | -0.50379000 |
| H | 1.91737400  | 5.65478700  | -1.36950300 |
| H | 0.99208600  | 4.94606300  | -0.03249200 |
| C | 1.86205600  | 3.48000700  | -3.08377400 |
| H | 1.40580600  | 2.74005700  | -3.74617100 |
| H | 2.06176100  | 4.39733000  | -3.64651000 |
| H | 2.81103600  | 3.07672300  | -2.72177600 |
| C | -0.36457000 | 4.45884500  | -2.40252300 |
| H | -0.87377100 | 3.82750000  | -3.13381200 |
| H | -1.05750100 | 4.66643300  | -1.58172800 |
| H | -0.11675500 | 5.41100300  | -2.88196700 |
| C | -0.61345800 | 0.01732200  | 1.79797500  |
| C | -0.67731800 | -1.20698000 | 1.56529200  |
| C | -0.22736700 | -2.59838000 | 1.67703500  |
| C | -0.06306000 | 1.17121900  | 2.57372700  |
| H | -0.76805700 | 1.41554000  | 3.37419300  |
| H | -1.05716900 | -3.30624100 | 1.73648600  |
| O | 0.07056300  | 2.35765900  | 1.82289800  |
| H | 0.64934300  | 2.16030400  | 1.06752400  |
| C | 1.23265100  | 0.68458600  | 3.21754200  |
| C | 1.17259500  | 0.02706600  | 4.45010600  |
| C | 2.46393500  | 0.81279300  | 2.56788600  |
| C | 2.32740900  | -0.49561600 | 5.03202800  |
| H | 0.21496500  | -0.07508000 | 4.95599400  |
| C | 3.61936100  | 0.29459600  | 3.15088700  |
| H | 2.53369400  | 1.30494700  | 1.60521400  |
| C | 3.55494900  | -0.36179200 | 4.38103100  |
| H | 2.26922200  | -0.99977900 | 5.99237600  |
| H | 4.56517600  | 0.39196800  | 2.62859400  |
| H | 4.45672400  | -0.76695900 | 4.83068300  |
| H | 0.39523000  | -2.84616200 | 0.81408600  |
| H | 0.38531100  | -2.67864100 | 2.58208500  |
| C | 2.67681300  | -1.34896300 | -1.12482800 |
| H | 2.28131000  | -1.01618000 | -2.09400900 |
| O | 1.77457500  | -0.96477000 | -0.08418900 |

|   |            |             |             |
|---|------------|-------------|-------------|
| H | 1.54673000 | -0.02928300 | -0.22942400 |
| C | 4.02619700 | -0.68268500 | -0.91133500 |
| C | 4.34155200 | 0.46829100  | -1.63776300 |
| C | 4.90788600 | -1.13517200 | 0.07490300  |
| C | 5.52452500 | 1.16363400  | -1.38232800 |
| H | 3.64557000 | 0.82045600  | -2.39364000 |
| C | 6.09174700 | -0.44483800 | 0.32953400  |
| H | 4.65489500 | -2.02828400 | 0.63796800  |
| C | 6.40152300 | 0.70898700  | -0.39687900 |
| H | 5.76145400 | 2.05795400  | -1.95183900 |
| H | 6.77574300 | -0.80559500 | 1.09293400  |
| H | 7.32380000 | 1.24687400  | -0.19708600 |
| C | 2.72206700 | -2.81339500 | -1.13478700 |
| C | 2.67315100 | -4.02070200 | -1.15609400 |
| C | 2.57559100 | -5.47452300 | -1.20441500 |
| H | 2.80880800 | -5.92622300 | -0.23359900 |
| H | 1.56031900 | -5.78084500 | -1.48222700 |
| H | 3.26751400 | -5.89687200 | -1.94187000 |

**TS-b1i<sub>2a</sub>**

|    |             |             |             |
|----|-------------|-------------|-------------|
| N  | -0.81703300 | 0.77669300  | -1.05829100 |
| C  | -0.56596700 | -1.35133900 | -1.94609500 |
| C  | -0.26611700 | -2.20766300 | -3.00262100 |
| H  | 0.37433100  | -1.83774800 | -3.79620100 |
| C  | -0.80615900 | -3.49498200 | -3.02854500 |
| H  | -0.57842500 | -4.16316300 | -3.85377900 |
| C  | -1.65547800 | -3.91719700 | -1.99961100 |
| H  | -2.08953600 | -4.91298200 | -2.02677600 |
| C  | -1.92893600 | -3.07090000 | -0.92485900 |
| H  | -2.53775800 | -3.42608900 | -0.09780700 |
| C  | -1.37597200 | -1.78139900 | -0.87230000 |
| C  | -3.65113000 | 1.55961900  | 0.55013000  |
| C  | -4.01062800 | 0.98358500  | -0.74917100 |
| C  | -4.42965800 | -0.35135500 | -0.54157200 |
| C  | -4.29247600 | -0.64405200 | 0.87516300  |
| C  | -3.88782600 | 0.56557300  | 1.54370700  |
| Rh | -2.26432400 | -0.09998400 | 0.14606800  |
| C  | -0.14326000 | 0.07994500  | -2.00333900 |
| O  | 0.66021800  | 0.54522900  | -2.82458600 |
| C  | -3.76439700 | 0.75588300  | 3.02271800  |
| H  | -4.71840300 | 1.09913800  | 3.44181800  |
| H  | -3.50296900 | -0.17901200 | 3.52441900  |
| H  | -3.00155300 | 1.49950200  | 3.25999100  |
| C  | -3.23521300 | 2.97836700  | 0.78664200  |

|   |             |             |             |
|---|-------------|-------------|-------------|
| H | -4.10947000 | 3.62556100  | 0.93327700  |
| H | -2.59265900 | 3.05253500  | 1.66613900  |
| H | -2.67229600 | 3.35956200  | -0.06746400 |
| C | -3.94182400 | 1.72263600  | -2.04898300 |
| H | -4.80478700 | 2.39038900  | -2.16088300 |
| H | -3.03497400 | 2.32832800  | -2.10302300 |
| H | -3.93267300 | 1.03599000  | -2.89773100 |
| C | -4.90526100 | -1.32109600 | -1.57729400 |
| H | -5.98914200 | -1.47013100 | -1.50233500 |
| H | -4.68334400 | -0.96481800 | -2.58497400 |
| H | -4.42191700 | -2.29517500 | -1.46213700 |
| C | -4.70776800 | -1.91951700 | 1.54138200  |
| H | -5.76017100 | -1.87720600 | 1.85023300  |
| H | -4.59883600 | -2.77035100 | 0.86500000  |
| H | -4.10865900 | -2.11906000 | 2.43351800  |
| O | -0.61268400 | 2.18039500  | -1.20770500 |
| C | 0.53194700  | 2.64829300  | -0.69324800 |
| O | 1.23026100  | 2.02414000  | 0.09723100  |
| C | 0.90896200  | 4.02509500  | -1.21899000 |
| C | 1.40962500  | 4.87876000  | -0.04154600 |
| H | 2.20991600  | 4.36592600  | 0.49538900  |
| H | 1.79149100  | 5.83381800  | -0.41467800 |
| H | 0.60104800  | 5.08963600  | 0.66642300  |
| C | 2.06667900  | 3.74963300  | -2.21200900 |
| H | 1.74390000  | 3.05664000  | -2.99319700 |
| H | 2.38361400  | 4.69214800  | -2.66970900 |
| H | 2.91921000  | 3.30552000  | -1.69138300 |
| C | -0.25115600 | 4.72214300  | -1.94325300 |
| H | -0.59774600 | 4.13571400  | -2.79640500 |
| H | -1.09955700 | 4.88965800  | -1.27231400 |
| H | 0.08692000  | 5.69725300  | -2.30750300 |
| C | -0.78131200 | -0.47201900 | 1.50927200  |
| C | -0.49760200 | -1.57099800 | 0.91819600  |
| C | 0.31808600  | -2.80594700 | 1.00258600  |
| C | -0.37176400 | 0.31876700  | 2.71898600  |
| H | -1.14083000 | 0.16826000  | 3.48394500  |
| H | -0.30290400 | -3.69173600 | 1.16495100  |
| O | -0.37048100 | 1.71206100  | 2.45705300  |
| H | 0.14536400  | 1.84336700  | 1.64257200  |
| C | 0.94494100  | -0.20043700 | 3.27943200  |
| C | 0.92526700  | -1.25774600 | 4.19529400  |
| C | 2.17409800  | 0.31795400  | 2.86366000  |
| C | 2.11471300  | -1.79828700 | 4.68426100  |
| H | -0.02984300 | -1.66103600 | 4.52505600  |

|   |            |             |             |
|---|------------|-------------|-------------|
| C | 3.36397000 | -0.21573700 | 3.35683100  |
| H | 2.20792500 | 1.13668400  | 2.15564400  |
| C | 3.33943900 | -1.27688600 | 4.26322600  |
| H | 2.08486400 | -2.61812600 | 5.39616600  |
| H | 4.31015700 | 0.19246800  | 3.01751900  |
| H | 4.26825900 | -1.69213600 | 4.64327600  |
| H | 0.91633100 | -2.93764800 | 0.09973600  |
| H | 0.99309400 | -2.67691100 | 1.85448400  |
| C | 2.99490300 | -0.75655000 | -1.26492800 |
| H | 2.62671600 | -0.17389700 | -2.11906300 |
| O | 2.05830000 | -0.67364900 | -0.19123400 |
| H | 1.78039500 | 0.25447900  | -0.09894600 |
| C | 4.34827300 | -0.21102000 | -0.83787600 |
| C | 4.93751800 | 0.84965800  | -1.52736000 |
| C | 4.98528300 | -0.73258100 | 0.29384300  |
| C | 6.15475900 | 1.38514600  | -1.09729900 |
| H | 4.43829400 | 1.25833400  | -2.40219600 |
| C | 6.19831400 | -0.20120400 | 0.72440800  |
| H | 4.50950000 | -1.54240400 | 0.83707500  |
| C | 6.78692800 | 0.86052900  | 0.02922100  |
| H | 6.60478700 | 2.21158100  | -1.63996200 |
| H | 6.68863000 | -0.61274600 | 1.60250800  |
| H | 7.73219900 | 1.27537400  | 0.36700200  |
| C | 3.04581800 | -2.16438300 | -1.67513200 |
| C | 3.00821600 | -3.32217100 | -2.02050700 |
| C | 2.92580200 | -4.71394600 | -2.44686200 |
| H | 3.32237400 | -5.39391800 | -1.68445700 |
| H | 1.88334300 | -4.99499900 | -2.63826600 |
| H | 3.49284400 | -4.88256300 | -3.36938900 |

### II-b1i<sub>2a</sub>

|   |             |             |             |
|---|-------------|-------------|-------------|
| N | -0.53202900 | 1.03287000  | -0.58981900 |
| C | -0.94989500 | -0.45569800 | -2.32177100 |
| C | -1.47565600 | -0.25115900 | -3.61035600 |
| H | -1.13296400 | 0.61789900  | -4.16179200 |
| C | -2.39550900 | -1.13177700 | -4.16028600 |
| H | -2.79064400 | -0.95442200 | -5.15597000 |
| C | -2.81101800 | -2.25150200 | -3.42408800 |
| H | -3.53430900 | -2.94434600 | -3.84388400 |
| C | -2.27485500 | -2.48435500 | -2.16737200 |
| H | -2.56607300 | -3.36862400 | -1.60834100 |
| C | -1.32495400 | -1.61306300 | -1.57969400 |
| C | -3.33348100 | 1.53177500  | 1.24867600  |
| C | -3.71002700 | 1.97284300  | -0.10058600 |

|    |             |             |             |
|----|-------------|-------------|-------------|
| C  | -4.38248000 | 0.91284500  | -0.71789000 |
| C  | -4.47689500 | -0.20070300 | 0.24028000  |
| C  | -3.92955900 | 0.23108600  | 1.47893100  |
| Rh | -2.31560800 | 0.14595800  | -0.01011400 |
| C  | -0.07307500 | 0.67205700  | -1.80164700 |
| O  | 0.81025400  | 1.21194500  | -2.47243300 |
| C  | -4.00516000 | -0.46611200 | 2.79805500  |
| H  | -4.90860300 | -0.14797200 | 3.33377300  |
| H  | -4.05562500 | -1.55084700 | 2.67926700  |
| H  | -3.14251400 | -0.22231900 | 3.41960300  |
| C  | -2.66426800 | 2.38718900  | 2.27497200  |
| H  | -3.40770000 | 2.95726300  | 2.84749500  |
| H  | -2.07717900 | 1.77130000  | 2.95771300  |
| H  | -1.98904400 | 3.09823700  | 1.79569200  |
| C  | -3.31991900 | 3.29294200  | -0.68920100 |
| H  | -3.84452300 | 4.11420600  | -0.18704400 |
| H  | -2.24546100 | 3.46357800  | -0.57963100 |
| H  | -3.55760300 | 3.34195100  | -1.75366600 |
| C  | -4.87495600 | 0.82852500  | -2.12685600 |
| H  | -5.96109900 | 0.68139300  | -2.14857900 |
| H  | -4.64304500 | 1.73501300  | -2.68848200 |
| H  | -4.41654400 | -0.01584700 | -2.65275900 |
| C  | -5.19098900 | -1.48830600 | -0.02999000 |
| H  | -6.27624100 | -1.36755100 | 0.08010200  |
| H  | -4.99367200 | -1.83569900 | -1.04713900 |
| H  | -4.86666400 | -2.27025100 | 0.66002200  |
| O  | -0.01306200 | 2.28432000  | -0.15038200 |
| C  | 1.08667300  | 2.19967000  | 0.62215400  |
| O  | 1.52875400  | 1.14363600  | 1.04566400  |
| C  | 1.70108800  | 3.57060200  | 0.87711800  |
| C  | 2.86139600  | 3.41241500  | 1.86801200  |
| H  | 3.61571300  | 2.72401200  | 1.48456100  |
| H  | 3.32995700  | 4.38697900  | 2.03682900  |
| H  | 2.50994600  | 3.02704700  | 2.82946600  |
| C  | 2.21906200  | 4.10175800  | -0.47863700 |
| H  | 1.40993100  | 4.17697500  | -1.20772500 |
| H  | 2.66332800  | 5.09141700  | -0.33100300 |
| H  | 2.98493700  | 3.43762000  | -0.88470200 |
| C  | 0.63025700  | 4.52359600  | 1.44421800  |
| H  | -0.19205300 | 4.66555000  | 0.73894300  |
| H  | 0.22097900  | 4.14503900  | 2.38669800  |
| H  | 1.08351000  | 5.49969700  | 1.64273500  |
| C  | -1.08829600 | -1.28885600 | 0.77413200  |
| C  | -0.70804800 | -2.04723600 | -0.26280900 |

|   |             |             |             |
|---|-------------|-------------|-------------|
| C | 0.16605200  | -3.27975700 | -0.35083300 |
| C | -0.76837900 | -1.35077100 | 2.24923600  |
| H | -1.67367400 | -1.68113100 | 2.76992300  |
| H | -0.26097200 | -3.98951200 | -1.06808500 |
| O | -0.51442400 | -0.03716200 | 2.76071600  |
| H | 0.14604500  | 0.36521500  | 2.17183200  |
| C | 0.33761200  | -2.31727000 | 2.63170000  |
| C | 0.01130200  | -3.55665000 | 3.18977700  |
| C | 1.68364300  | -2.00540600 | 2.40985100  |
| C | 1.00601600  | -4.48672600 | 3.49532400  |
| H | -1.03283400 | -3.79974300 | 3.37389900  |
| C | 2.67806300  | -2.93125800 | 2.71567400  |
| H | 1.95656300  | -1.04793900 | 1.98555000  |
| C | 2.34449100  | -4.17680800 | 3.25263100  |
| H | 0.73676400  | -5.44771700 | 3.92429000  |
| H | 3.71879400  | -2.68249800 | 2.52912200  |
| H | 3.12275100  | -4.89763100 | 3.48517400  |
| H | 1.15608800  | -2.98465200 | -0.71256800 |
| H | 0.28259200  | -3.78280700 | 0.60628400  |
| C | 3.30542200  | -0.41345300 | -1.53609700 |
| H | 2.78860900  | 0.25080600  | -2.24176200 |
| O | 2.34995100  | -1.01853900 | -0.66946900 |
| H | 1.89689400  | -0.30666200 | -0.18589900 |
| C | 4.33242700  | 0.40879300  | -0.76163700 |
| C | 4.87965000  | 1.56543200  | -1.32161500 |
| C | 4.74244200  | 0.00406800  | 0.51160500  |
| C | 5.82846500  | 2.31102000  | -0.61882700 |
| H | 4.55864800  | 1.88149300  | -2.31080300 |
| C | 5.68773800  | 0.74737700  | 1.21624200  |
| H | 4.30236400  | -0.89030600 | 0.93842500  |
| C | 6.23477000  | 1.90352500  | 0.65267500  |
| H | 6.24363400  | 3.21216200  | -1.06099500 |
| H | 5.99604500  | 0.42833100  | 2.20782800  |
| H | 6.96779700  | 2.48522400  | 1.20383800  |
| C | 3.97148100  | -1.47973600 | -2.29157700 |
| C | 4.53842600  | -2.33694800 | -2.92742000 |
| C | 5.22381100  | -3.37559300 | -3.68832900 |
| H | 5.78810000  | -4.04575600 | -3.02987300 |
| H | 4.51462700  | -3.98712700 | -4.25774100 |
| H | 5.93196600  | -2.93910500 | -4.40199400 |



## References

1. Rakshit, S., Grohmann, C., Besset, T., Glorius, F. Rh(III)-catalyzed directed C-H olefination using an oxidizing directing group: mild, efficient, and versatile. *J. Am. Chem. Soc.* 2011, 133, 2350.
2. Presset, M., Oehlich, D., Rombouts, F., Molander, G. A. Complementary regioselectivity in Rh(III)-catalyzed insertions of potassium vinyltrifluoroborate via C-H activation: preparation and use of 4-trifluoroboratotetrahydroisoquinolones. *Org. Lett.* 2013, 15, 1528.
3. Guimond, N., Gorelsky, S. I., Fagnou, K. Rhodium(III)-catalyzed heterocycle synthesis using an internal oxidant: improved reactivity and mechanistic studies. *J. Am. Chem. Soc.* 2011, 133, 6449.
4. Wang, H., Glorius, F. Mild rhodium(III)-catalyzed C-H activation and intermolecular annulation with allenes. *Angew. Chem. Int. Ed.* 2012, 51, 7318.
5. Webb, N. J., Marsden, S. P., Raw, S. A. Rhodium(III)-catalyzed C-H activation/annulation with vinyl esters as an acetylene equivalent. *Org. Lett.* 2014, 16, 4718.
6. Xiaowei, W., Bao, W., Shengbin, Z., Yu, Z., Hong, L. Ruthenium-Catalyzed Redox-Neutral [4 + 1] Annulation of Benzamides and Propargyl Alcohols via C-H Bond Activation. *ACS Catal.* 2017, 7, 2494.
7. Erenler, R., Uno, M., Goud, T. V., Biellmann, J-F. Preparation of Some heterocyclic enones and ynones by isomerisation of the propargylic alcohols. *J. Chem. Res.* 2009, 459.
8. Yan, W., Wang, Q., Chen, Y., Petersen, J. L., Shi, X. Iron-catalyzed C-O bond activation for the synthesis of propargyl-1,2,3-triazoles and 1,1-bis-triazoles. *Org. Lett.* 2010, 12, 3308.
9. Tian, Q., Chen, B., Zhang, G. Silver-initiated radical ring expansion/fluorination of ethynyl cyclobutanols: efficient synthesis of monofluoroethenyl cyclopentanones. *Green Chem.* 2016, 18, 6236.
10. González-Granda, S., Lavandera, I., Gotor-Fernández, V. Alcohol Dehydrogenases and N-Heterocyclic Carbene Gold(I) Catalysts: Design of a Chemoenzymatic Cascade towards Optically Active  $\beta,\beta$ -Disubstituted Allylic Alcohols. *Angew. Chem. Int. Ed.* 2021, 60, 13945.
11. Galler, D. J., Bermudez, G. C., Parker, K. A. Multi-gram-scale synthesis of a versatile syn-anti stereotriad by a short and cost-effective route. *Arkivoc* 2019, 3, 93.
12. Das, A., Chaudhuri, R., Liu, R. S. Gold-catalyzed oxidative cleavage of aryl-substituted alkynyl ethers using molecular oxygen. Simultaneous degradation of C-H and single and triple carbon-carbon bonds under ambient conditions. *Chem. Commun.* 2009, 27, 4046.
13. Parr, R. G.; Yang, W. Density Functional Theory of Atoms and Molecules. Oxford University Press: New York, 1989.
14. Frisch, M. J.; Trucks, G. W.; Schlegel, H. B.; Scuseria, G. E.; Robb, M. A.; Cheeseman, J. R.; Scalmani, G.; Barone, V.; Mennucci, B.; Petersson, G.A.; Nakatsuji, H.; Caricato, M.; Li, X.; Hratchian, H. P.; Izmaylov, A. F.; Bloino, J.; Zheng, G.; Sonnenberg, J. L.; Hada, M.; Ehara, M.; Toyota, K.; Fukuda, R.; Hasegawa, J.; Ishida, M.; Nakajima, T.; Honda, Y.; Kitao, O.; Nakai, H.; Vreven, T.; Montgomery, J. A.; Peralta, Jr., J. E.; Ogliaro, F.; Bearpark, M.; Heyd, J.J.; Brothers, E.; Kudin, K.N.; Staroverov, V. N.; Keith, T.; Kobayashi, R.; Normand, J.; Raghavachari, K.; Rendell, A.; Burant, J. C.; Iyengar, S. S.; Tomasi, J.; Cossi, M.; Rega, N.; Millam, J. M.; Klene, M.; Knox, J. E.; Cross, J. B.; Bakken, V.; Adamo, C.; Jaramillo, J.; Gomperts, R.; Stratmann, R. E.; Yazyev, O.; Austin, A. J.; Cammi, R.; Pomelli, C.; Ochterski, J. W.; Martin, R. L.; Morokuma, K.; Zakrzewski, V. G.; Voth, G.A.; Salvador, P.; Dannenberg, J. J.; Dapprich, S.; Daniels, A. D.;

- Farkas, O.; Foresman, J. B.; Ortiz, J. V.; Cioslowski J.; Fox, D. J. Gaussian 09, Revision E.01, Gaussian, Inc.: Wallingford CT, 2013.
15. (a) Lee, C.; Yang, W.; Parr, R. G. Development of the Colle-Salvetti correlation-energy formula into a functional of the electron density. *Phys. Rev. B: Condens. Matter Mater. Phys.* 1988, 37, 785. (b) Becke, A. D. Density-functional thermochemistry. III. The role of exact exchange. *J. Chem. Phys.* 1993, 98, 5648.
16. Grimme, S.; Antony, J.; Ehrlich, S.; Krieg, H. A consistent and accurate ab initio parametrization of density functional dispersion correction (DFT-D) for the 94 elements H-Pu. *J. Chem. Phys.* 2010, 132, 154104.
17. Andrae, D.; Häußermann, U.; Dolg, M.; Stoll, H.; Preuß, H. Energy-adjusted ab initio pseudopotentials for the second and third row transition elements. *Theor. Chim. Acta* 1990, 77, 123.
18. Ditchfield, R.; Hehre, W. J.; Pople, J. A. Self-Consistent Molecular-Orbital Methods. IX. An Extended Gaussian-Type Basis for Molecular-Orbital Studies of Organic Molecules. *J. Chem. Phys.* 1971, 54, 724-728.
19. (a) Gonzalez, C.; Schlegel, H. B. An improved algorithm for reaction path following. *J. Chem. Phys.* 1989, 90, 2154. (b) Gonzalez, C.; Schlegel, H. B. Reaction Path Following in Mass-Weighted Internal Coordinates. *J. Phys. Chem.* 1990, 94, 5523.
20. Marenich, A. V.; Cramer, C. J.; Truhlar, D. G. Universal solvation model based on solute electron density and on a continuum model of the solvent defined by the bulk dielectric constant and atomic surface tensions. *J. Phys. Chem. B* 2009, 113, 6378.
21. Zhao, Y.; Truhlar, D. G. A new local density functional for main-group thermochemistry, transition metal bonding, thermochemical kinetics, and noncovalent interactions. *J. Chem. Phys.* 2006, 125, 194101.

Copies of  $^1\text{H}$ ,  $^{13}\text{C}$  NMR and  $^{19}\text{F}$  NMR spectra

1-(4-(4-methylpiperazin-1-yl)phenyl)but-2-yn-1-ol (2am)

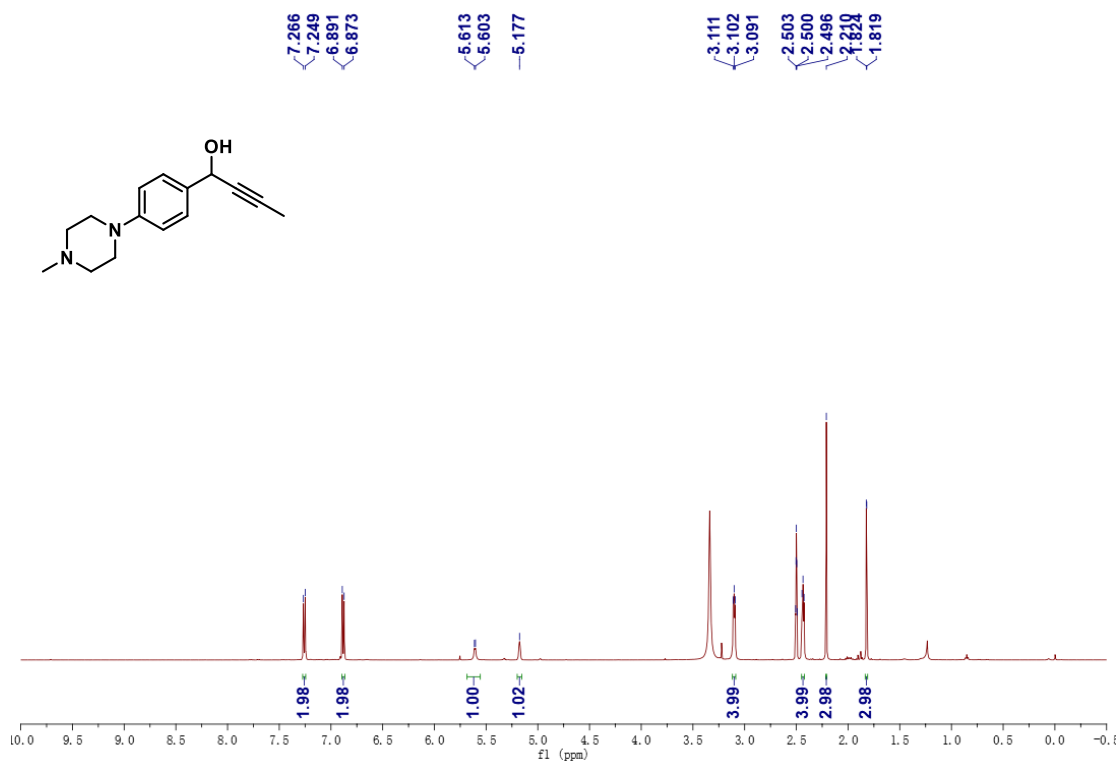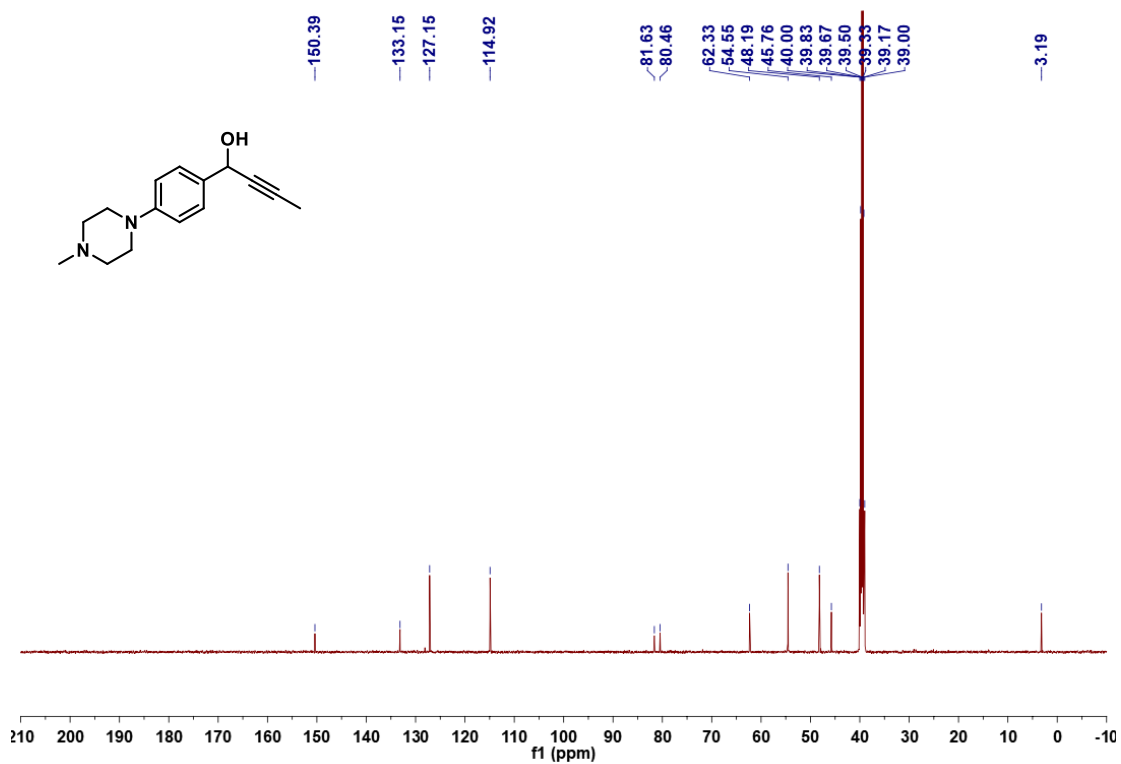

1-(4-(4-methylpiperazin-1-yl)phenyl)prop-2-yn-1-ol (2an)

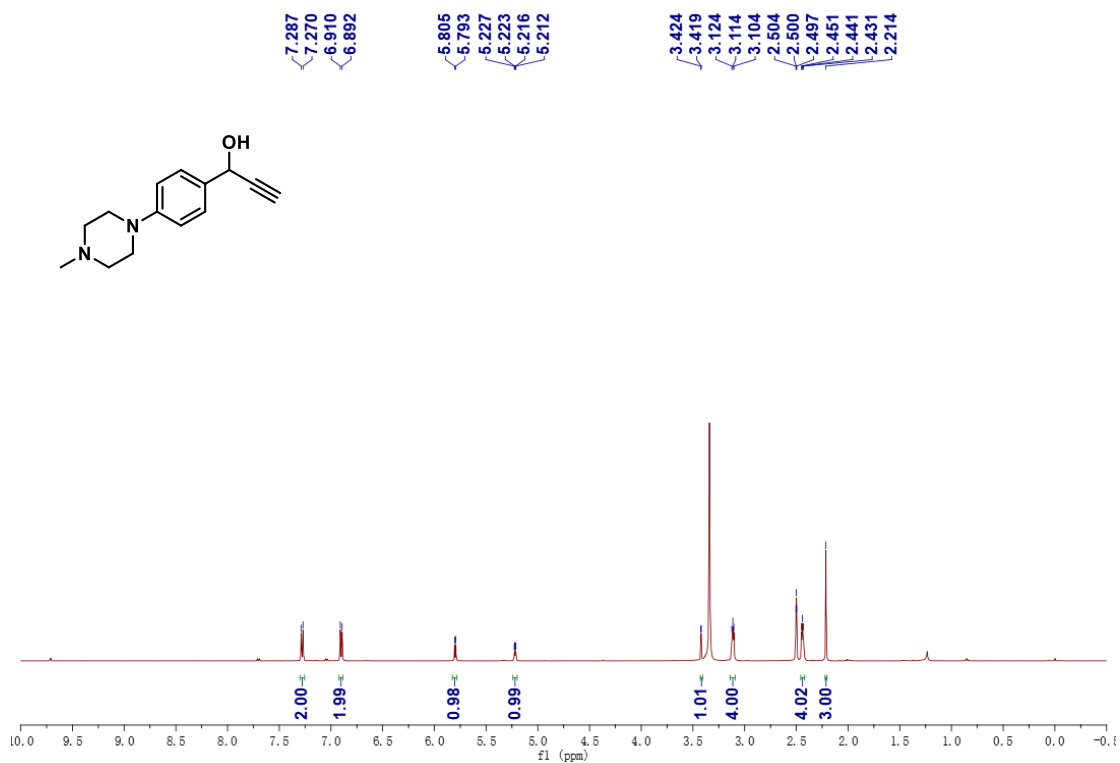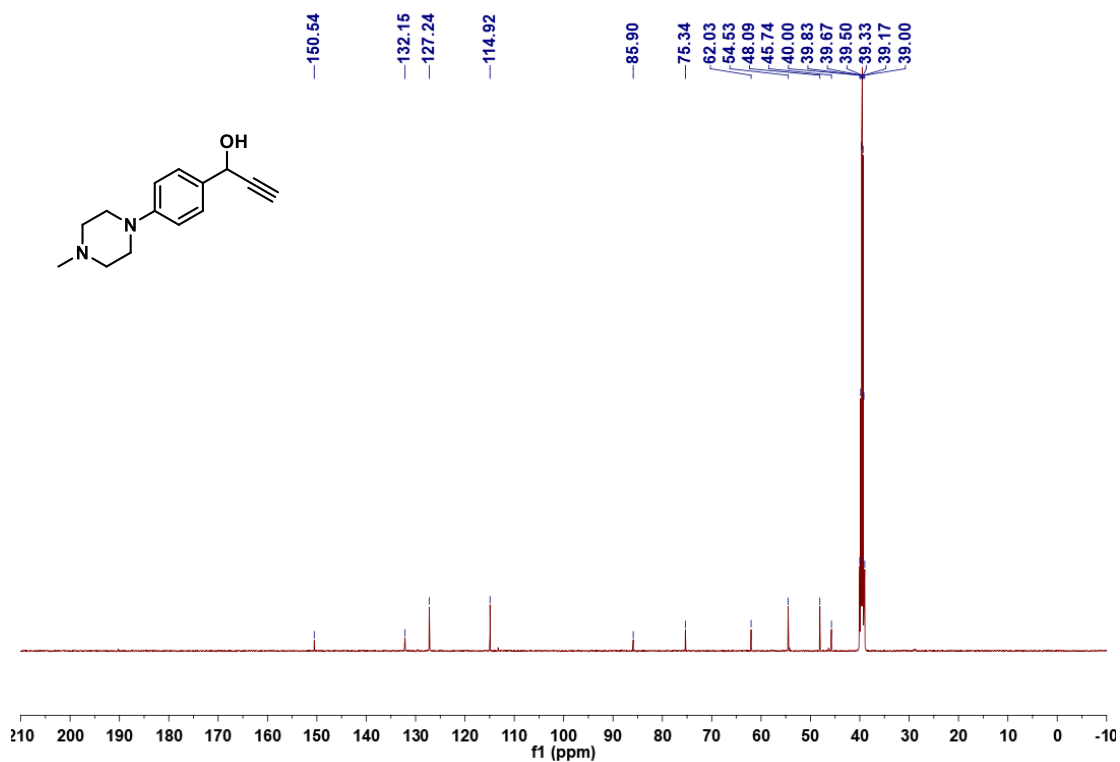

4-(hydroxy(phenyl)methyl)-3-methylisoquinolin-1(2H)-one (3aa)

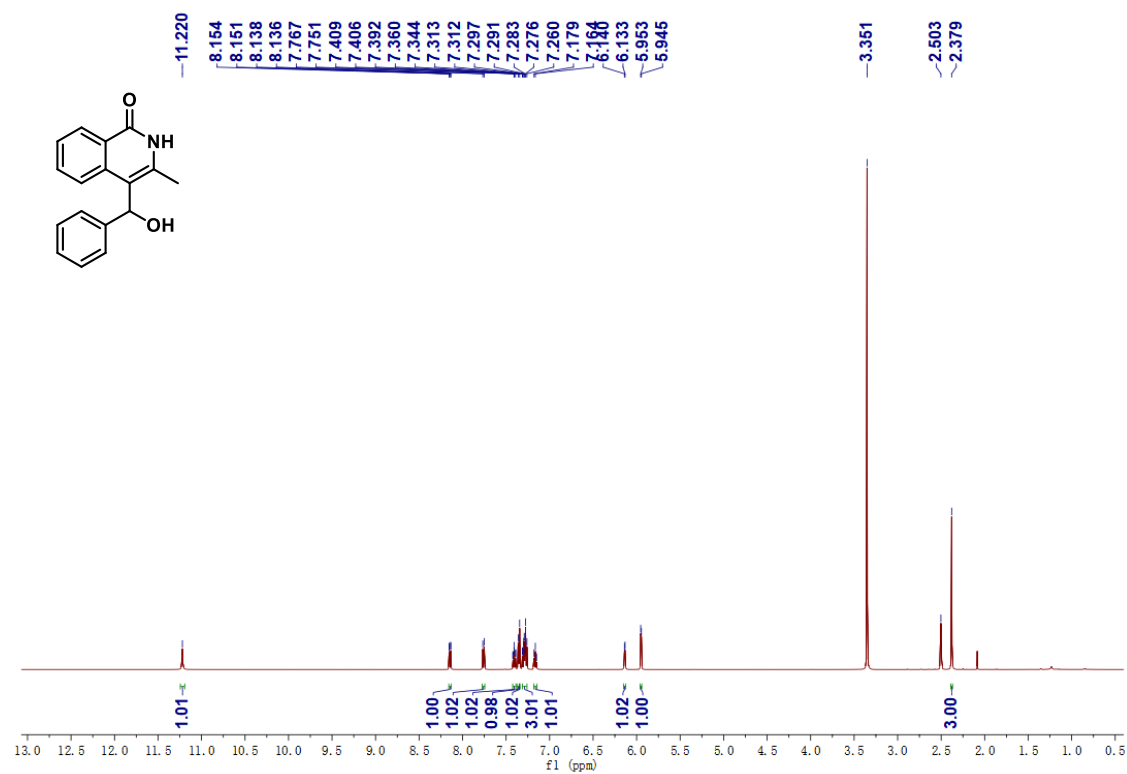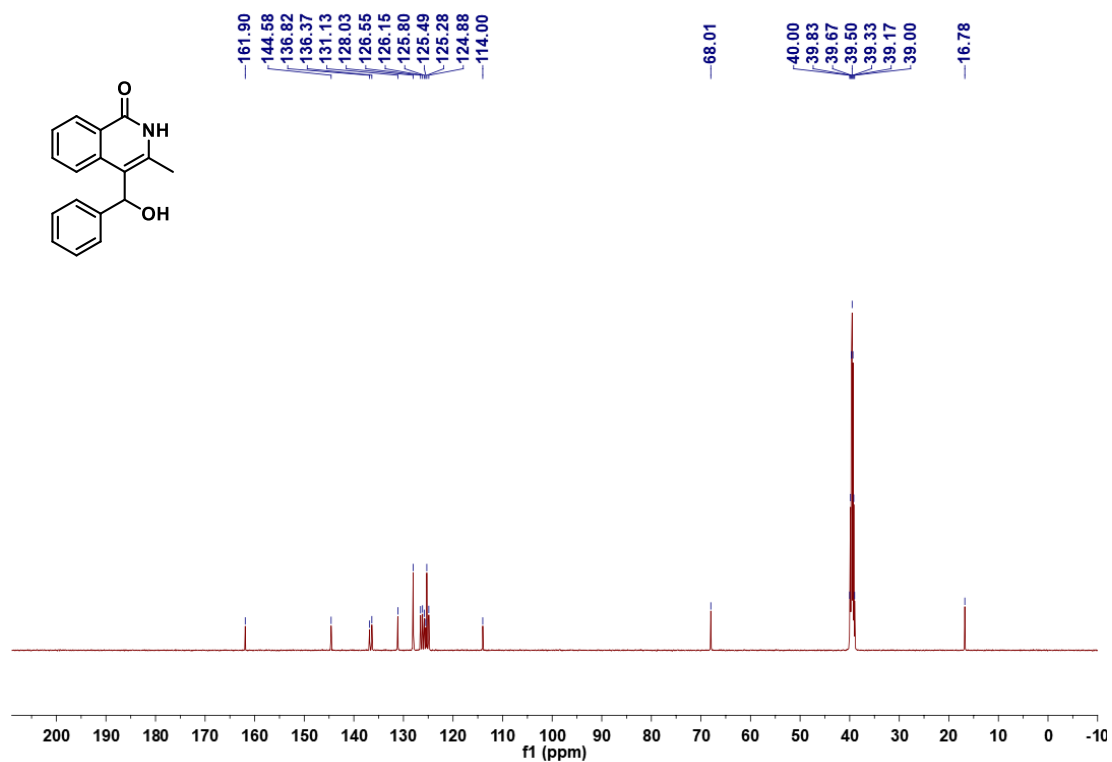

4-(hydroxy(phenyl)methyl)-3,6-dimethylisoquinolin-1(2H)-one (3ab)

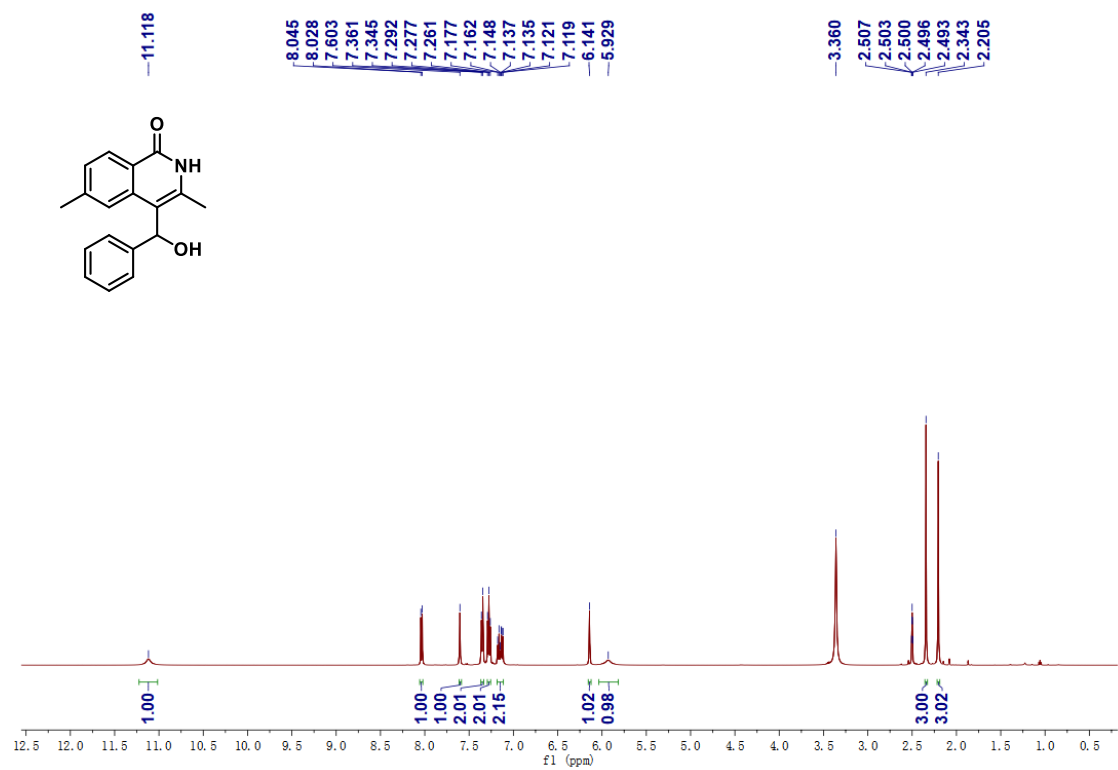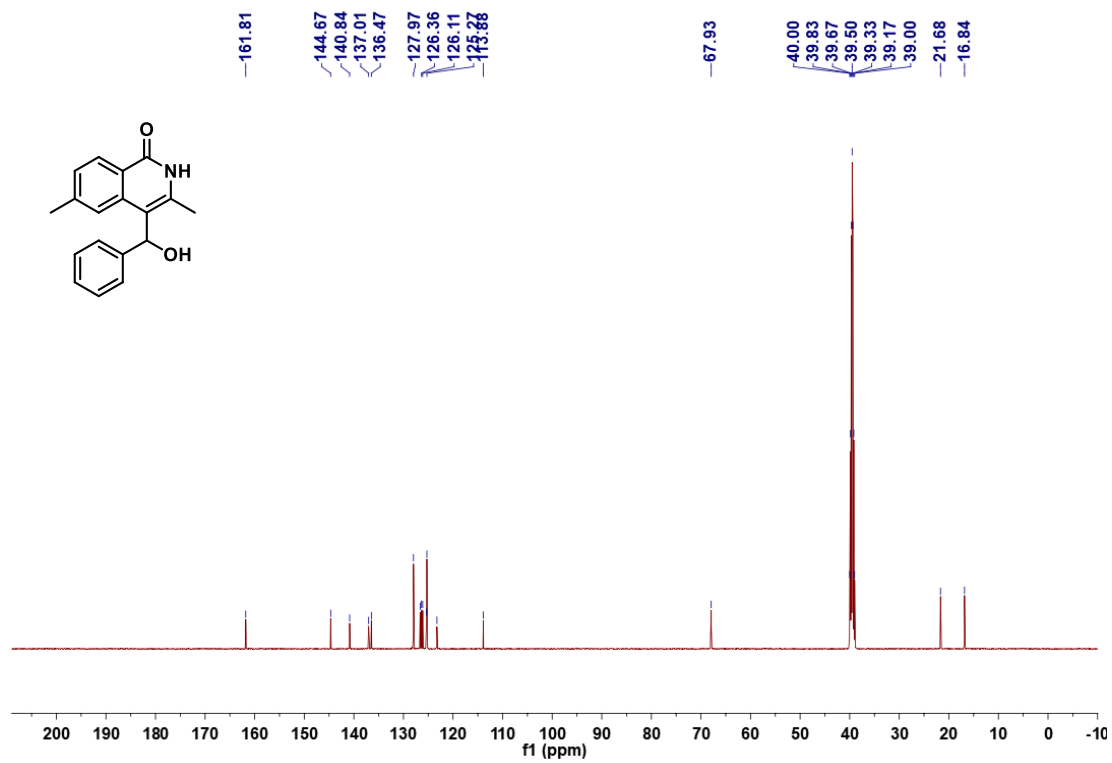

6-fluoro-4-(hydroxy(phenyl)methyl)-3-methylisoquinolin-1(2H)-one (3ac)

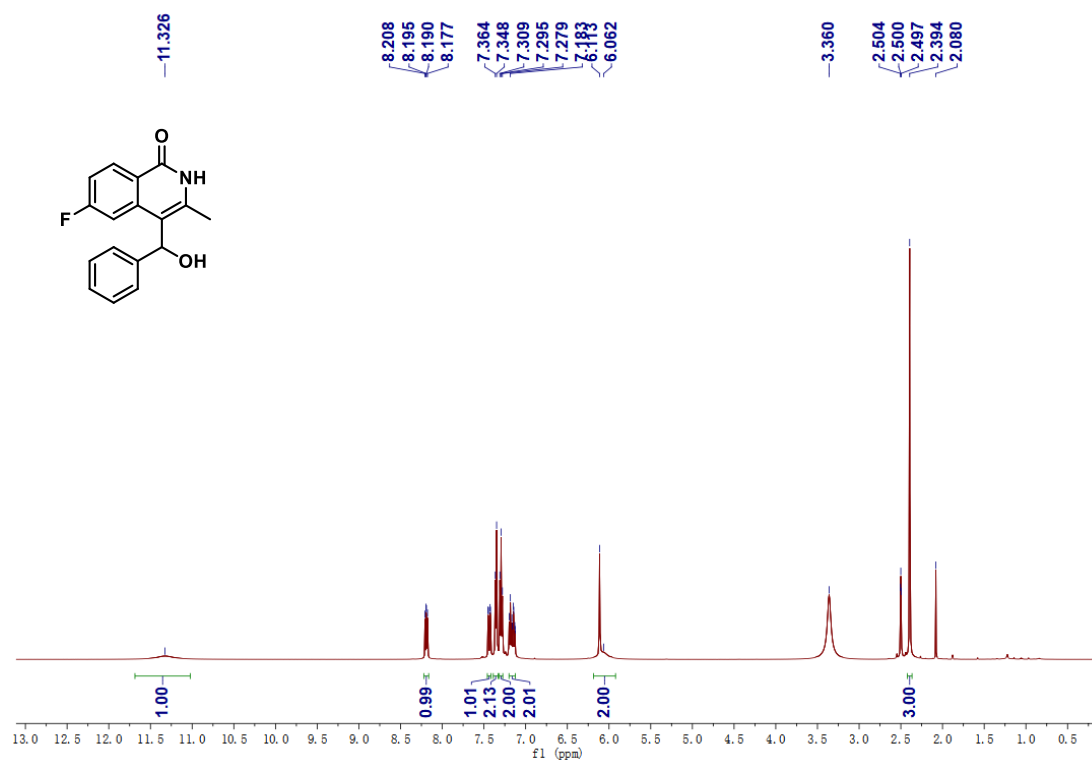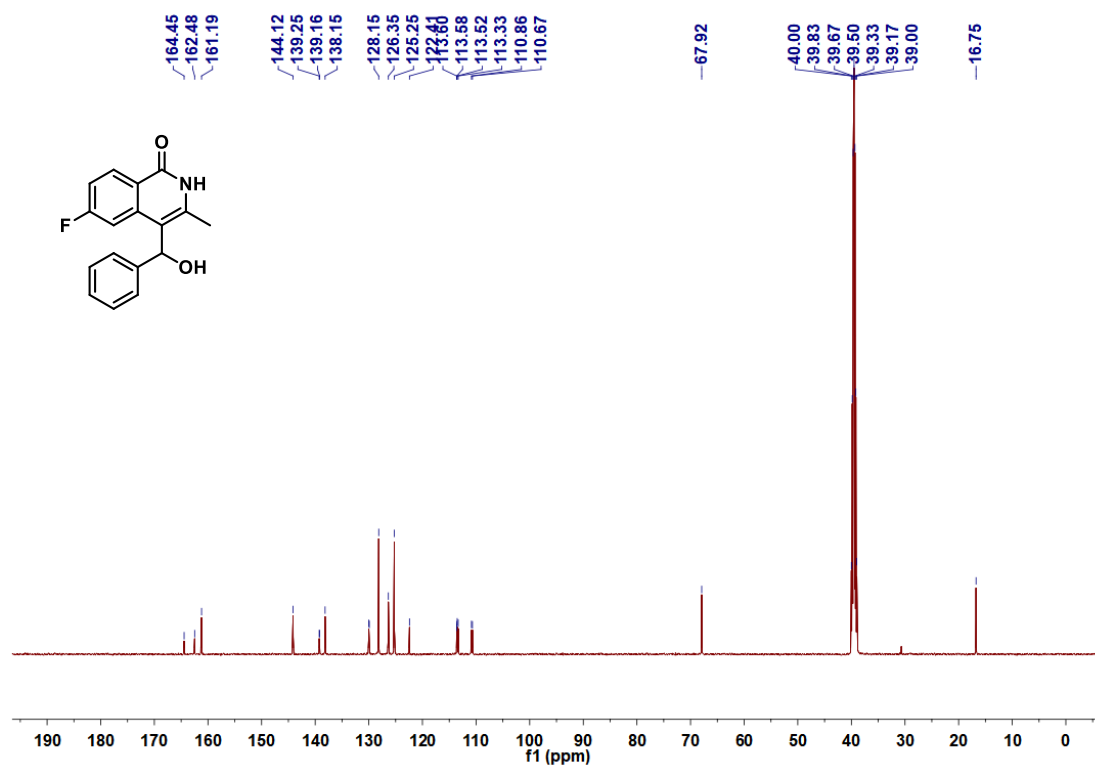

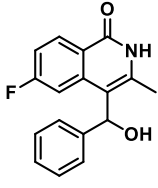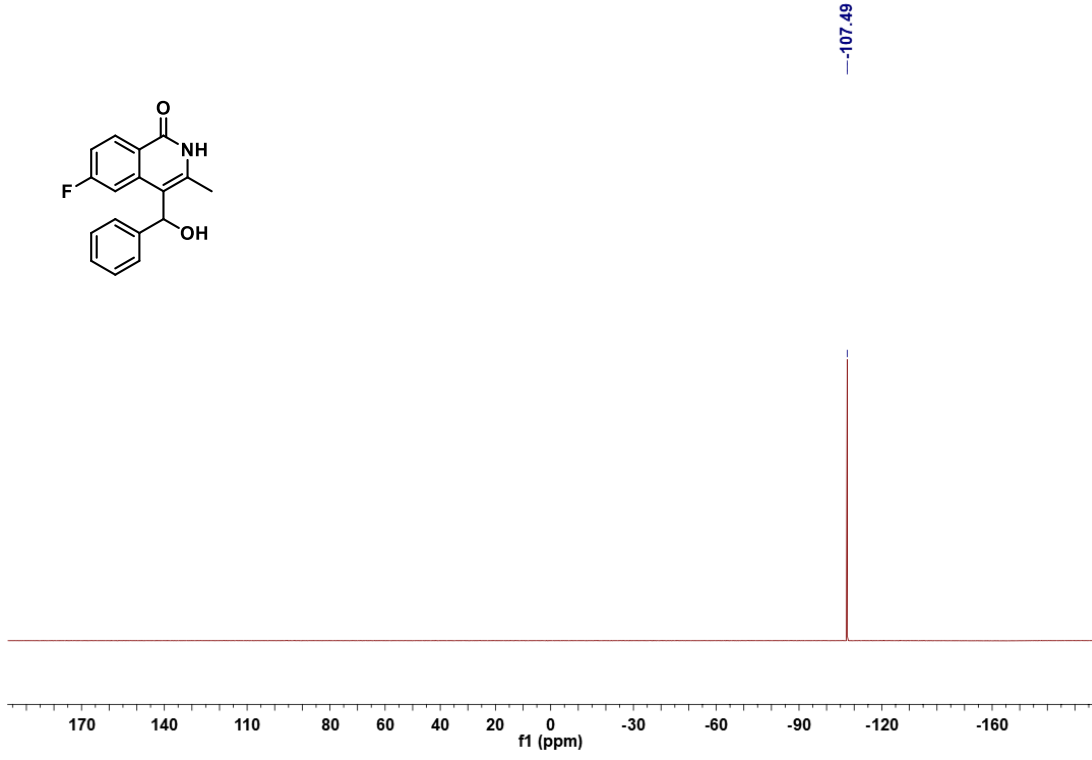



### 6-chloro-4-(hydroxy(phenyl)methyl)-3-methylisoquinolin-1(2H)-one (3ad)

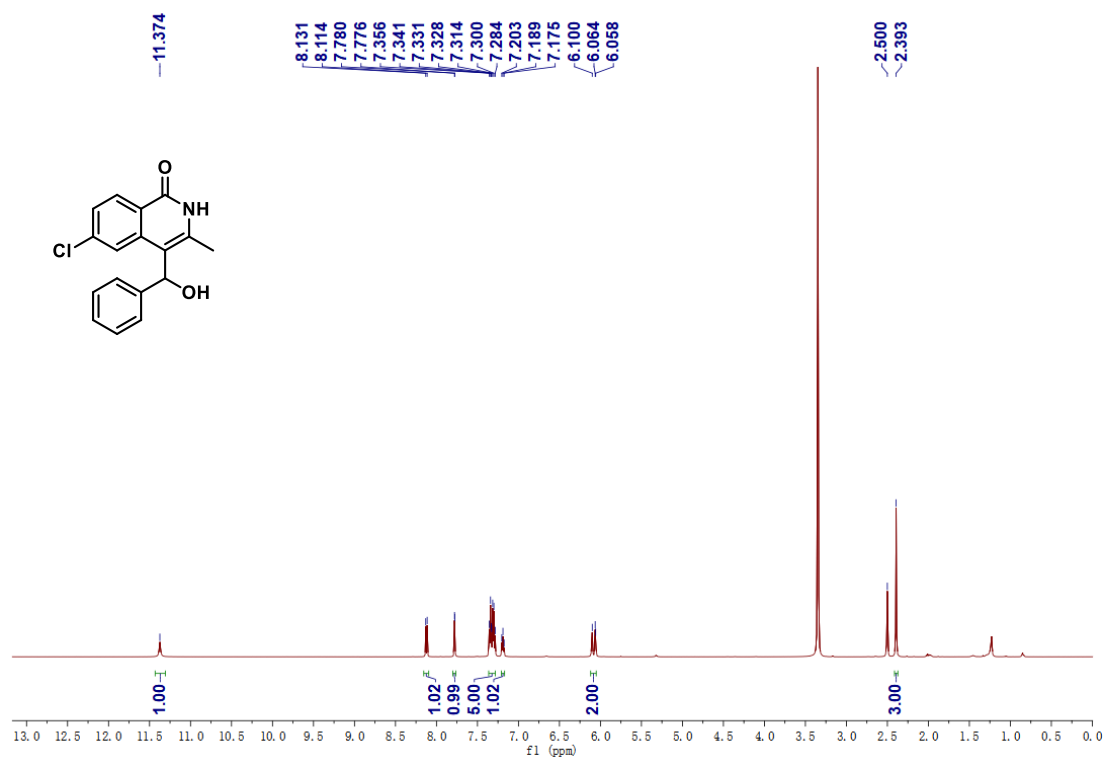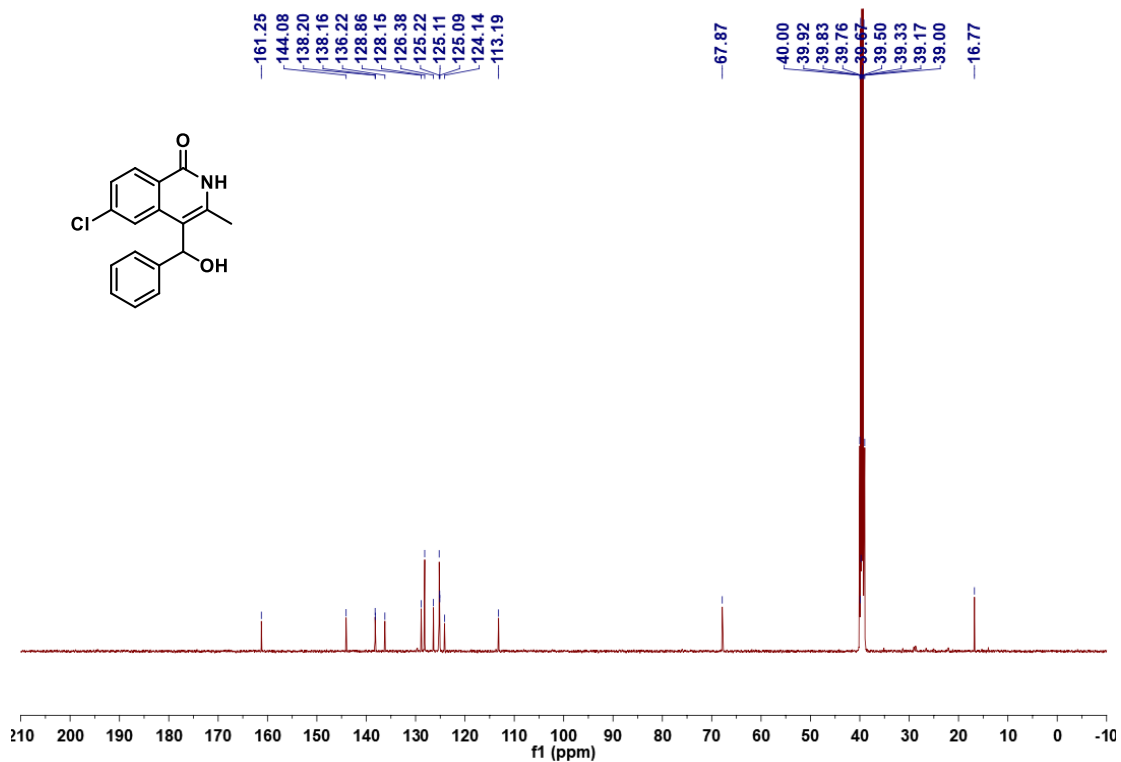

# 6-bromo-4-(hydroxy(phenyl)methyl)-3-methylisoquinolin-1(2H)-one (3ae)

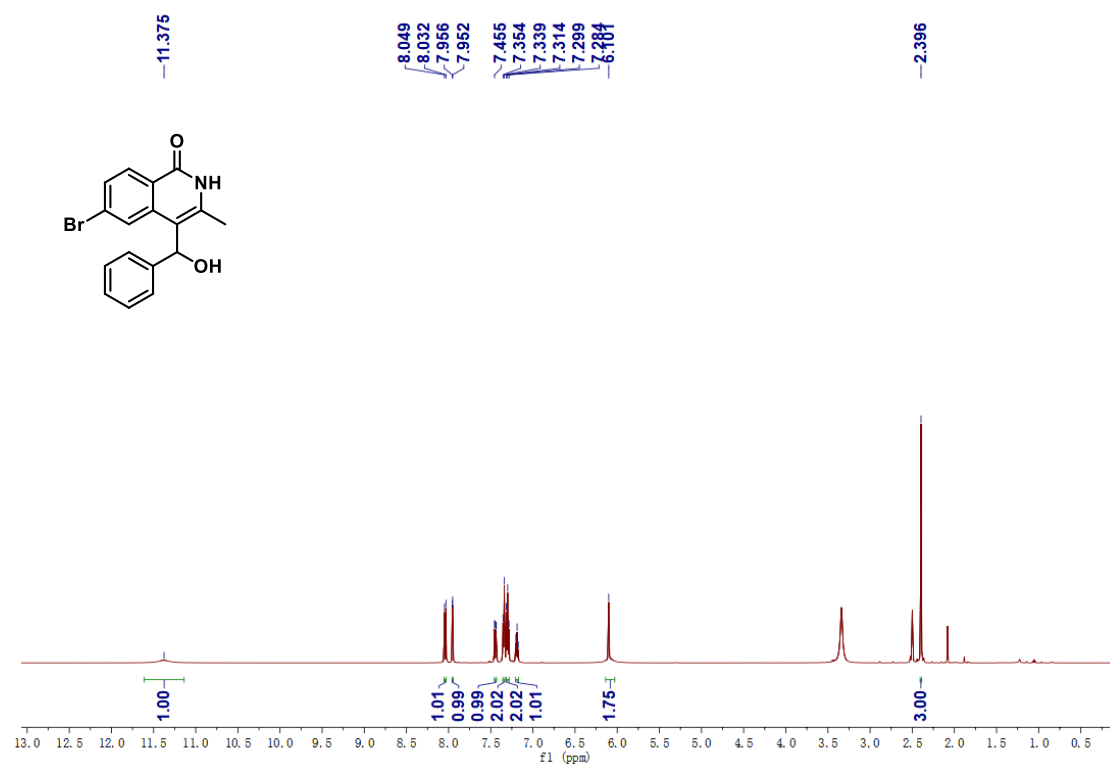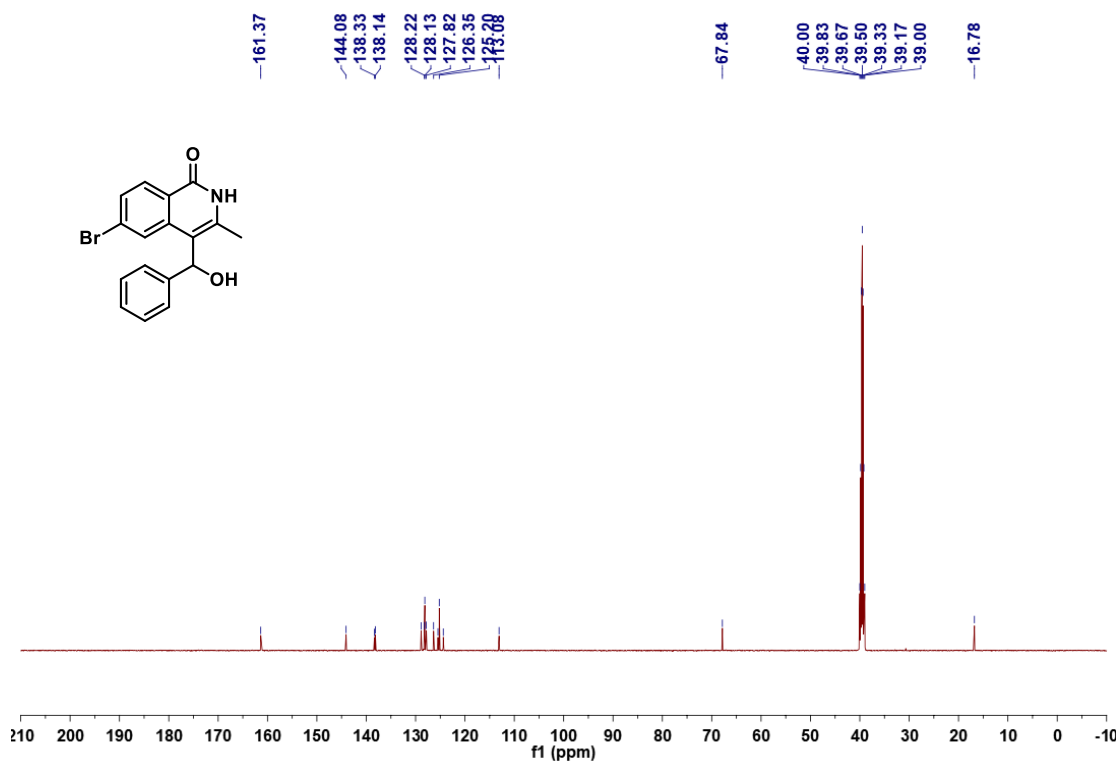

### 4-(hydroxy(phenyl)methyl)-6-iodo-3-methylisoquinolin-1(2H)-one (3af)

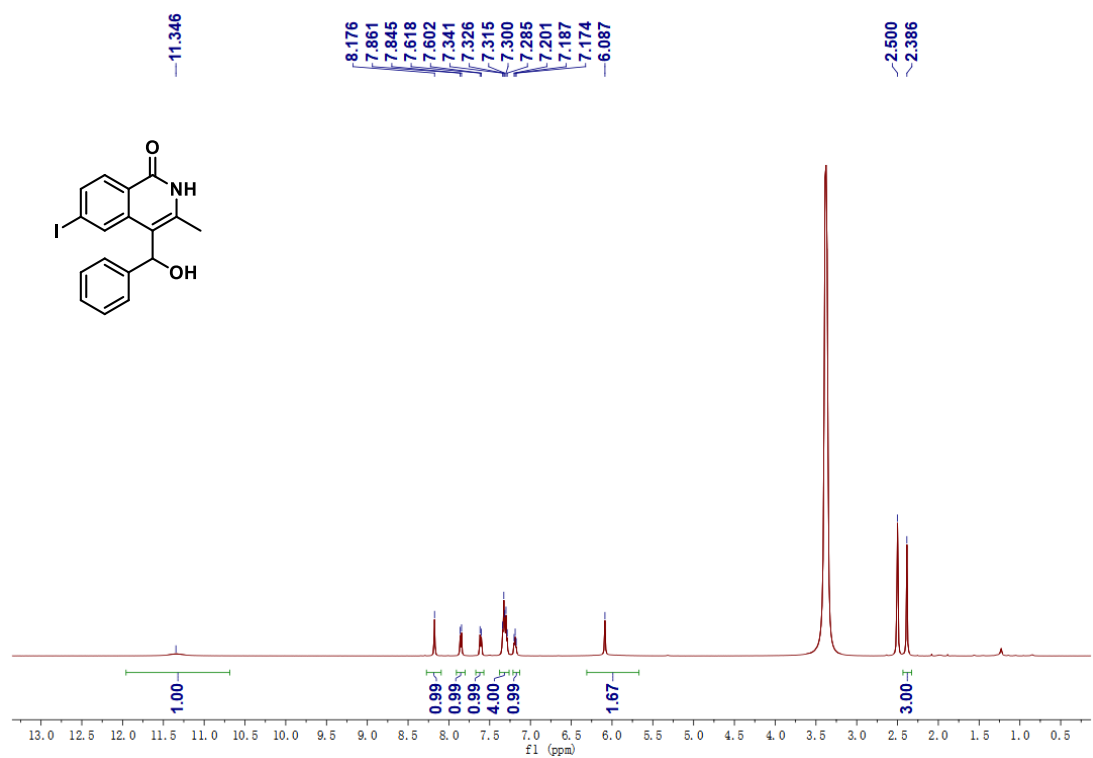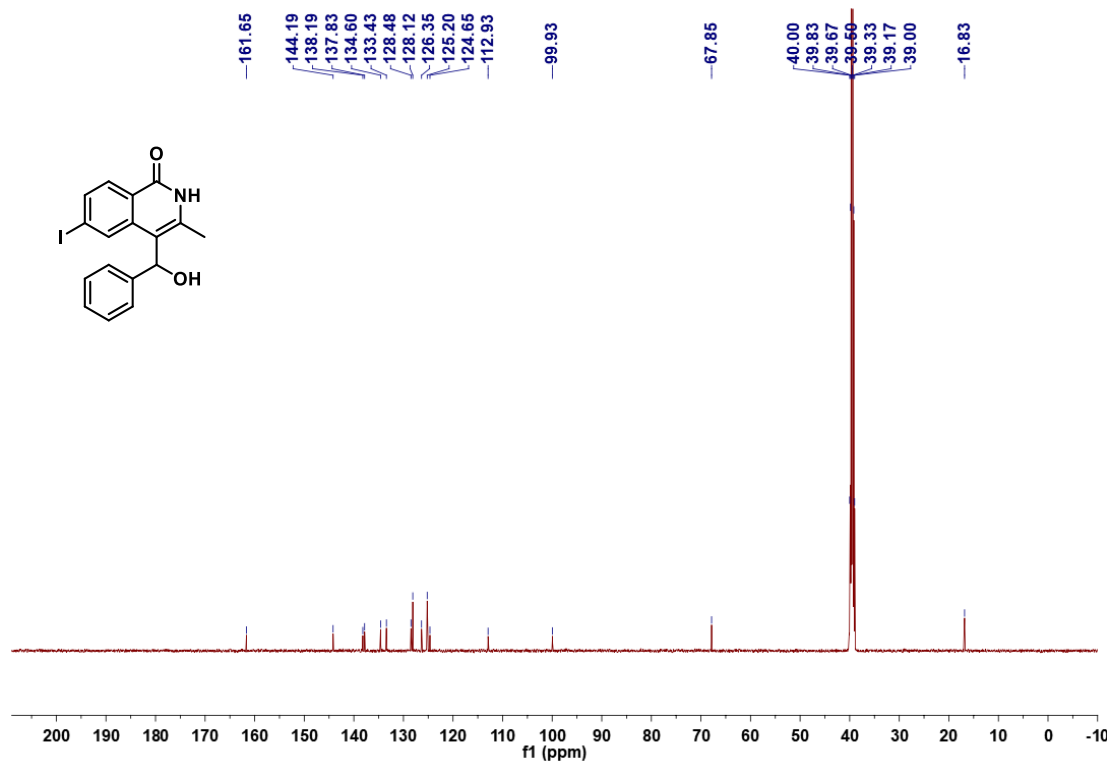

### 6-(tert-butyl)-4-(hydroxy(phenyl)methyl)-3-methylisoquinolin-1(2H)-one (3ag)

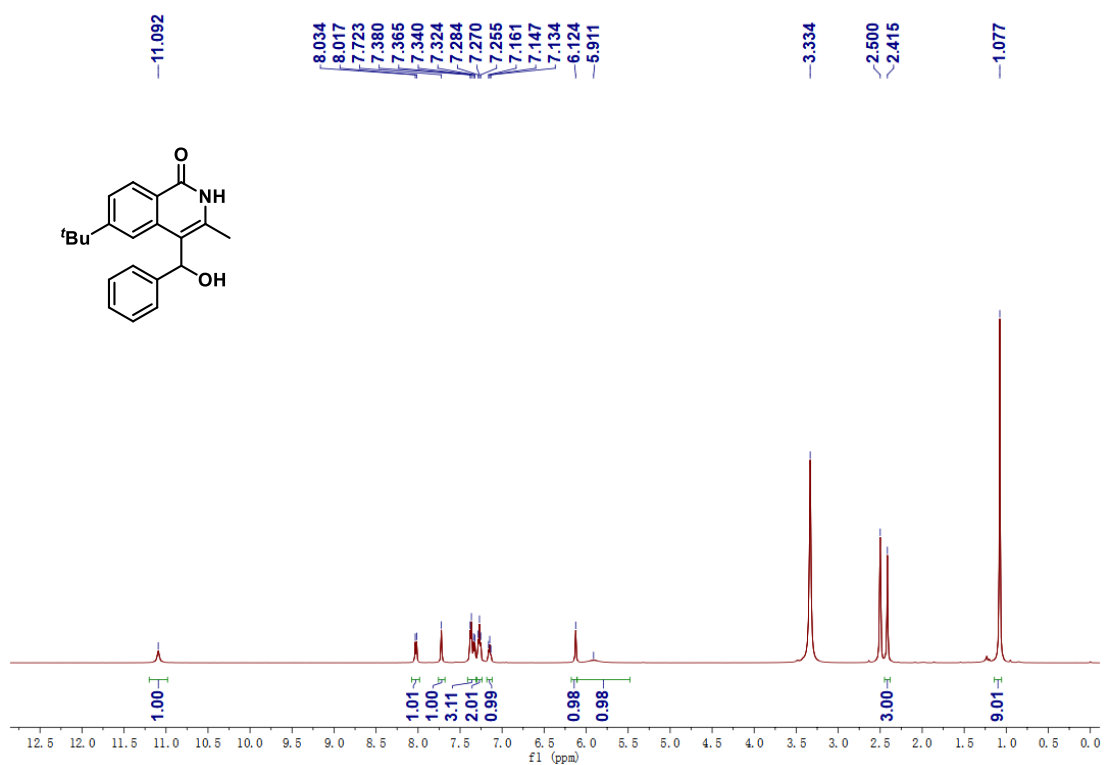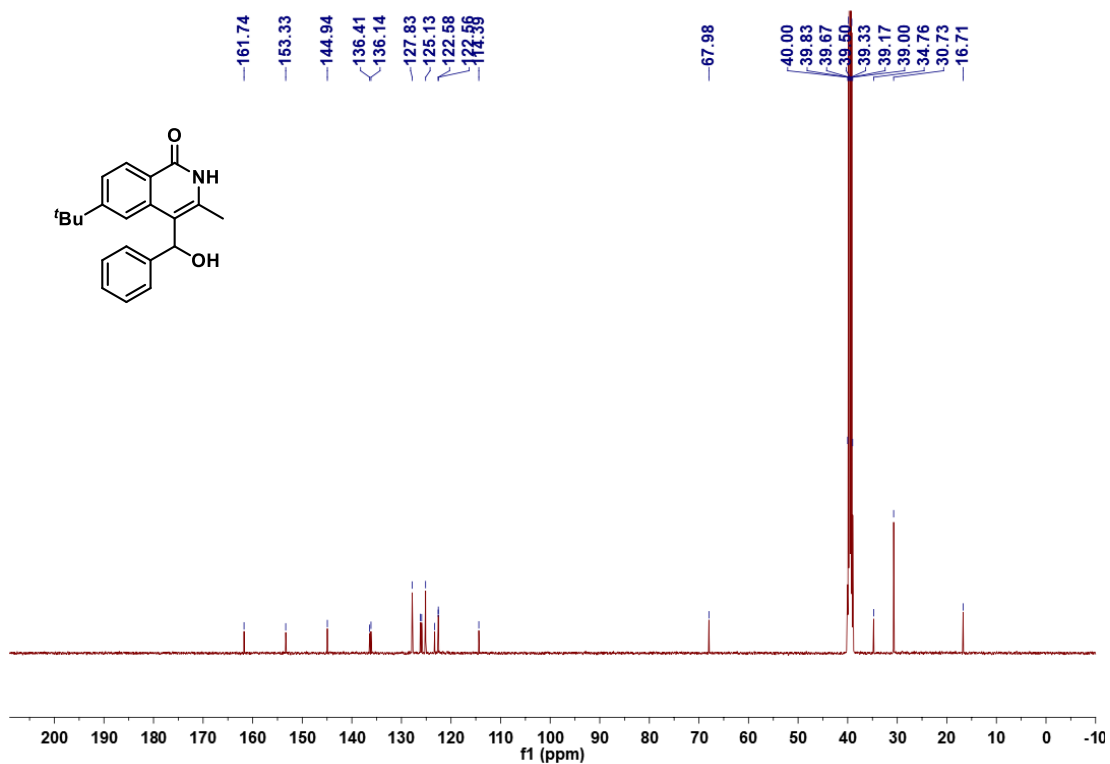

### 4-(hydroxy(phenyl)methyl)-6-methoxy-3-methylisoquinolin-1(2H)-one (3ah)

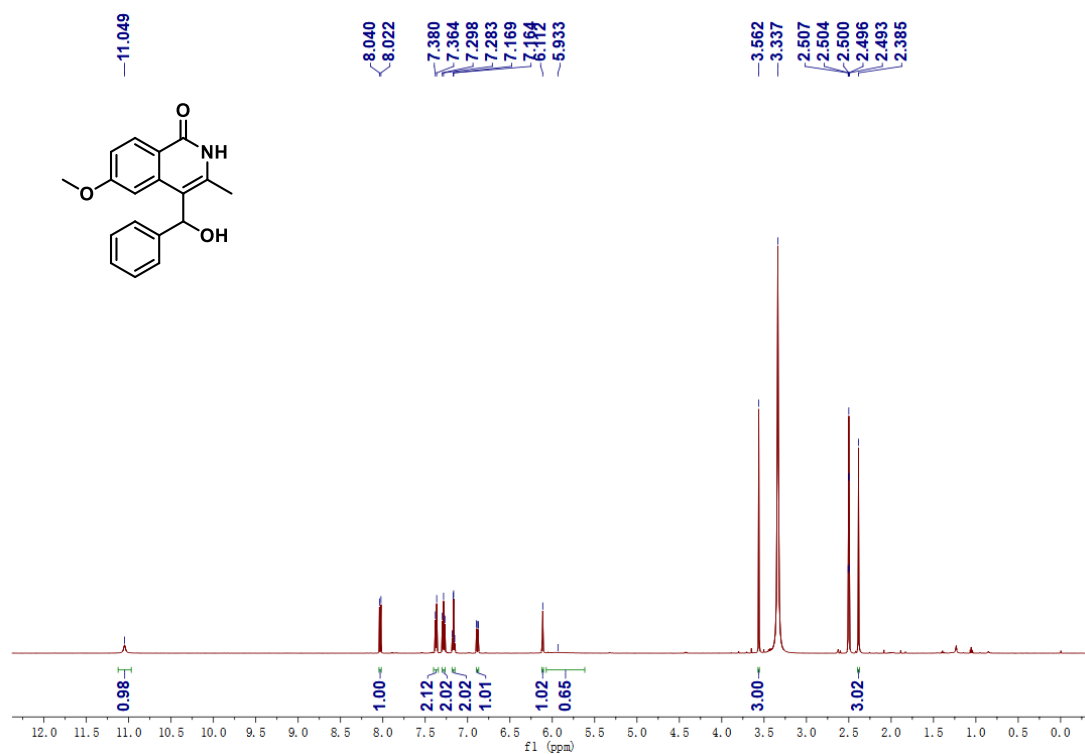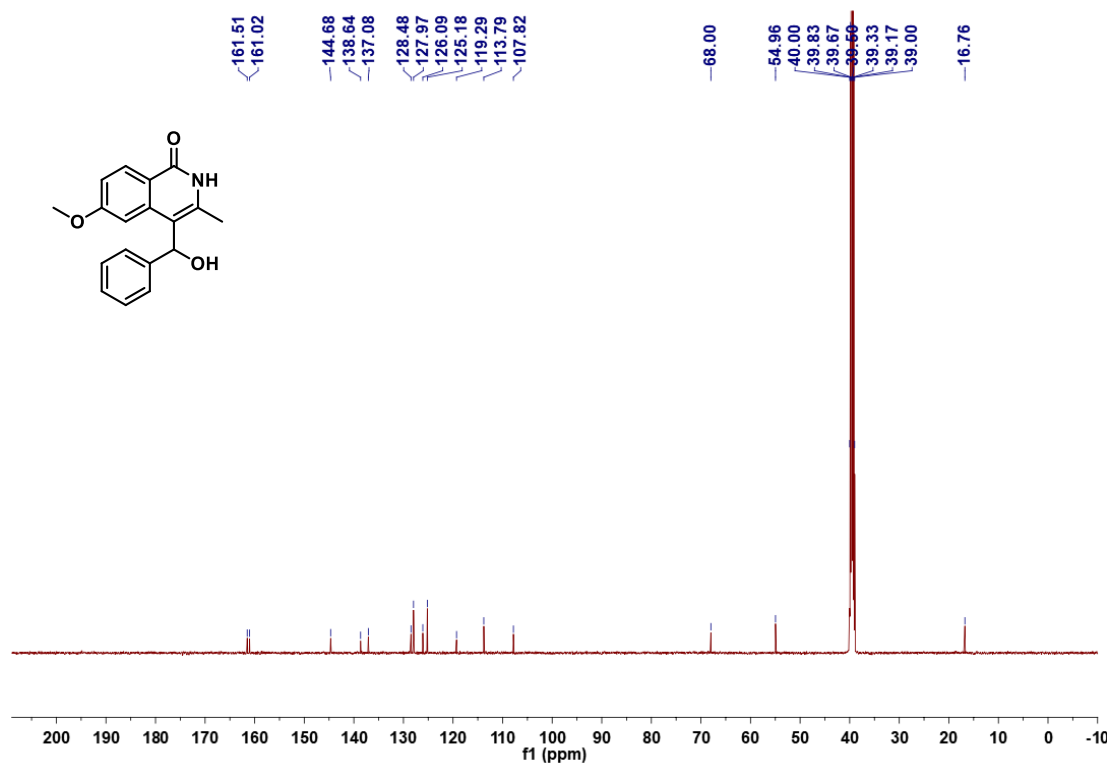

4-(hydroxy(phenyl)methyl)-3-methyl-1-oxo-1,2-dihydroisoquinoline-6-carbonitrile (3ai)

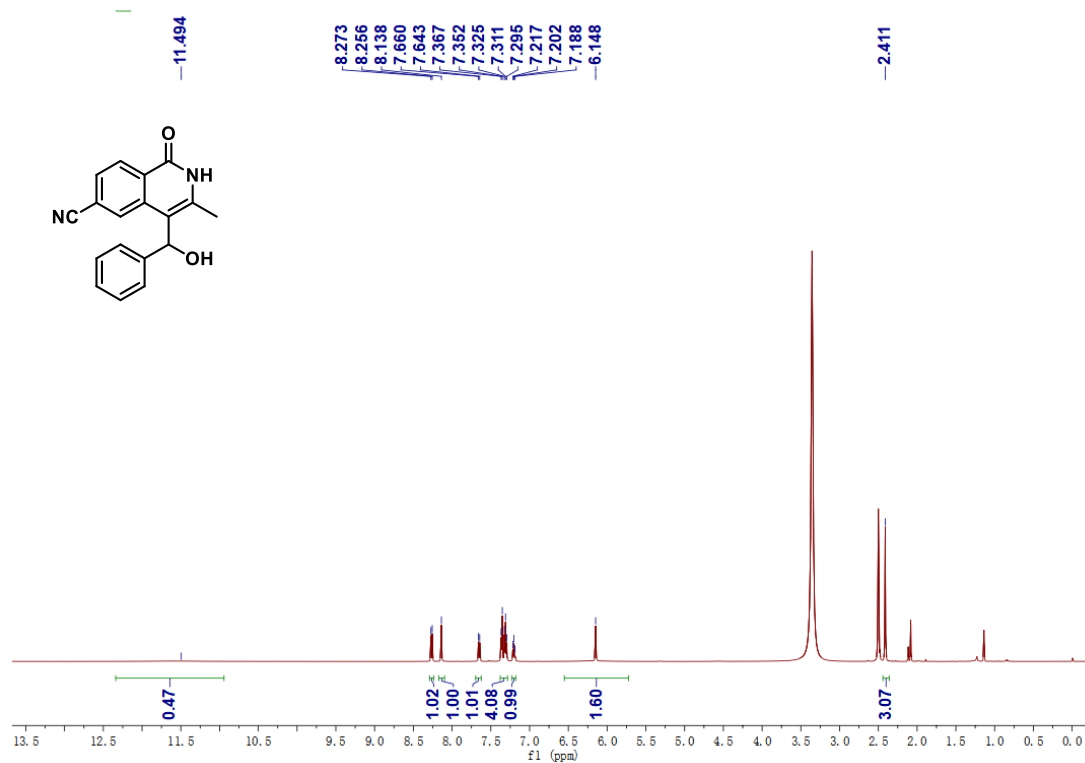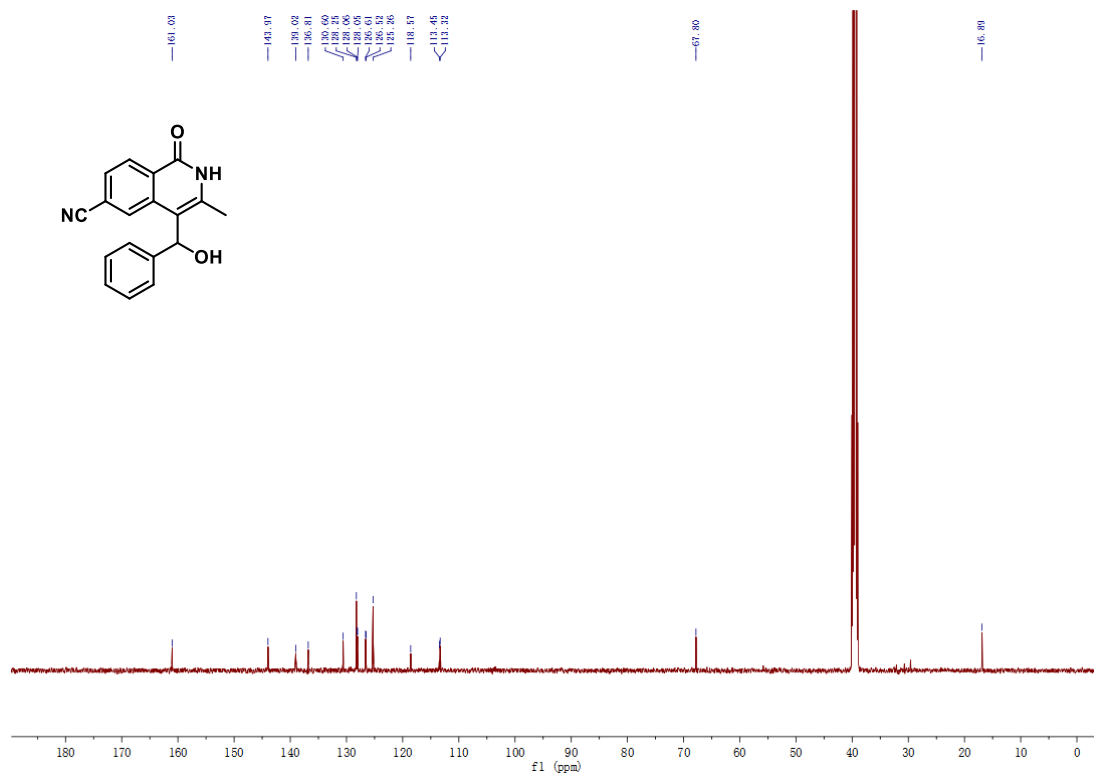

4-(hydroxy(phenyl)methyl)-3-methyl-6-nitroisoquinolin-1(2H)-one (3aj)

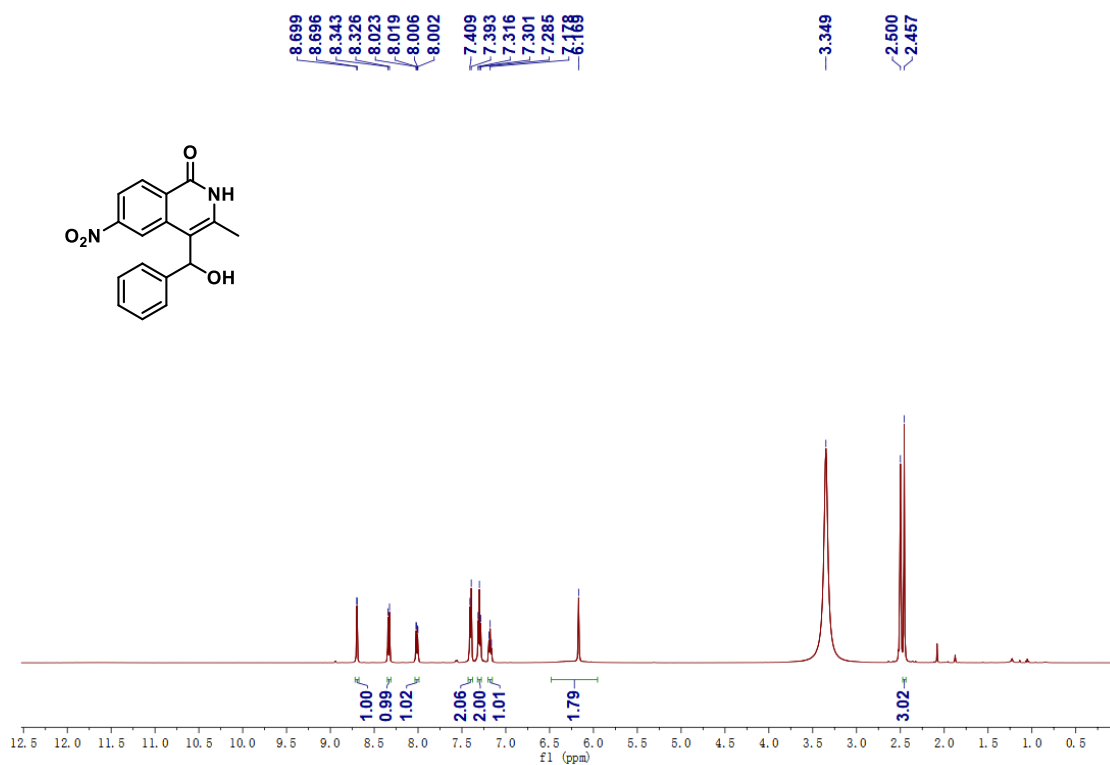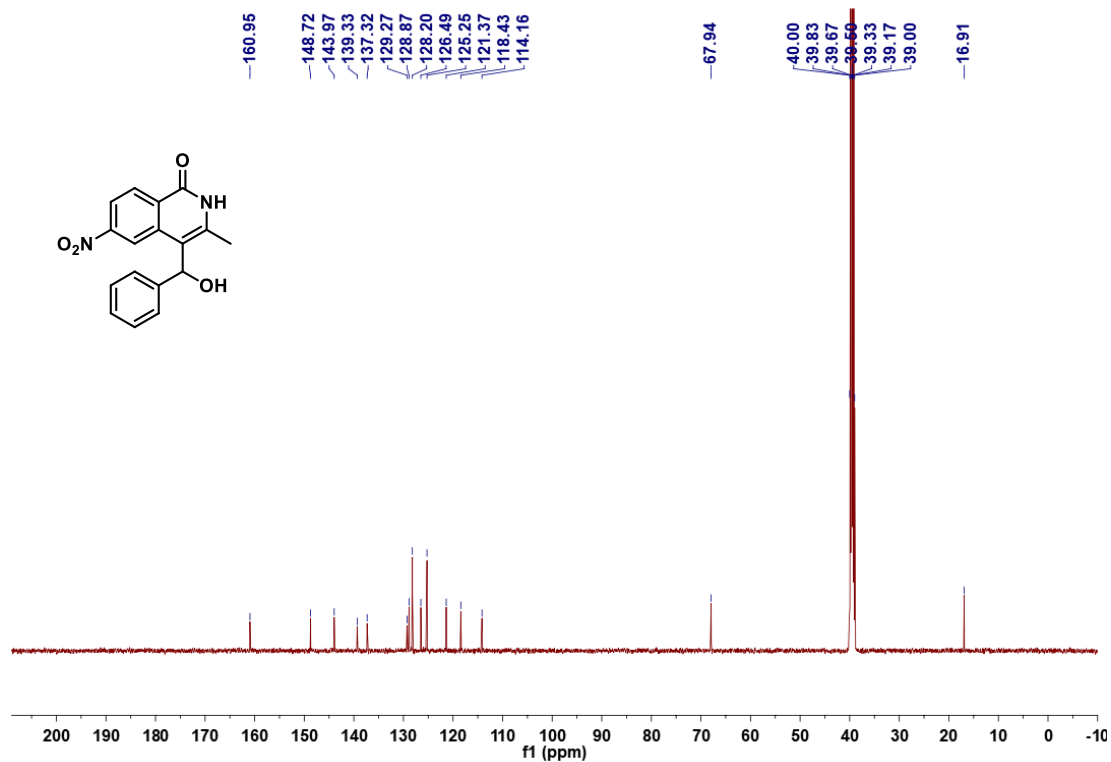

4-(hydroxy(phenyl)methyl)-3-methyl-6-(trifluoromethyl)isoquinolin-1(2H)-one (3ak)

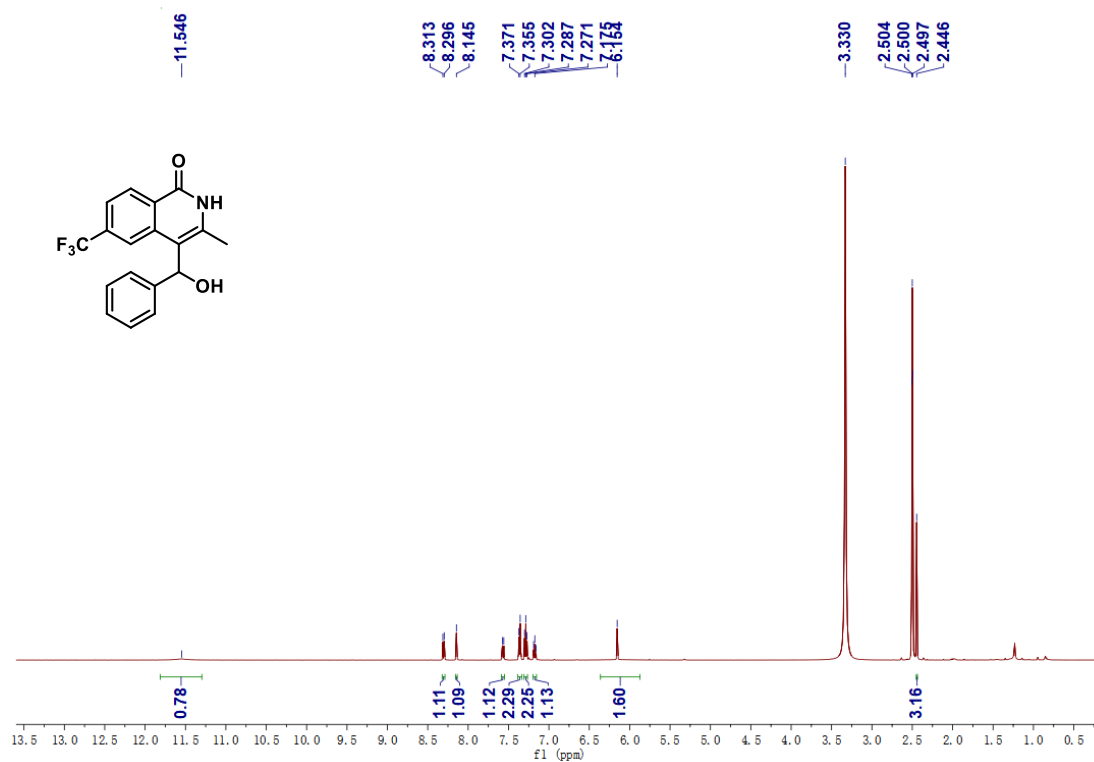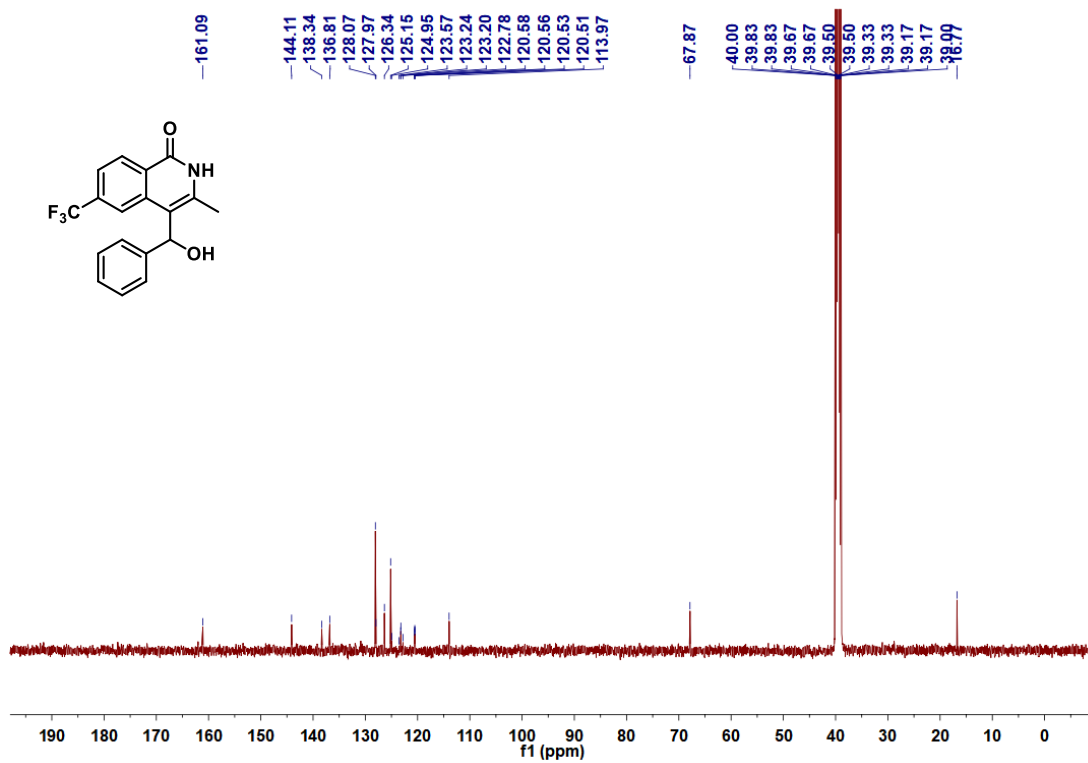



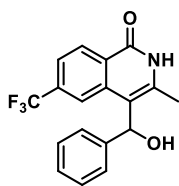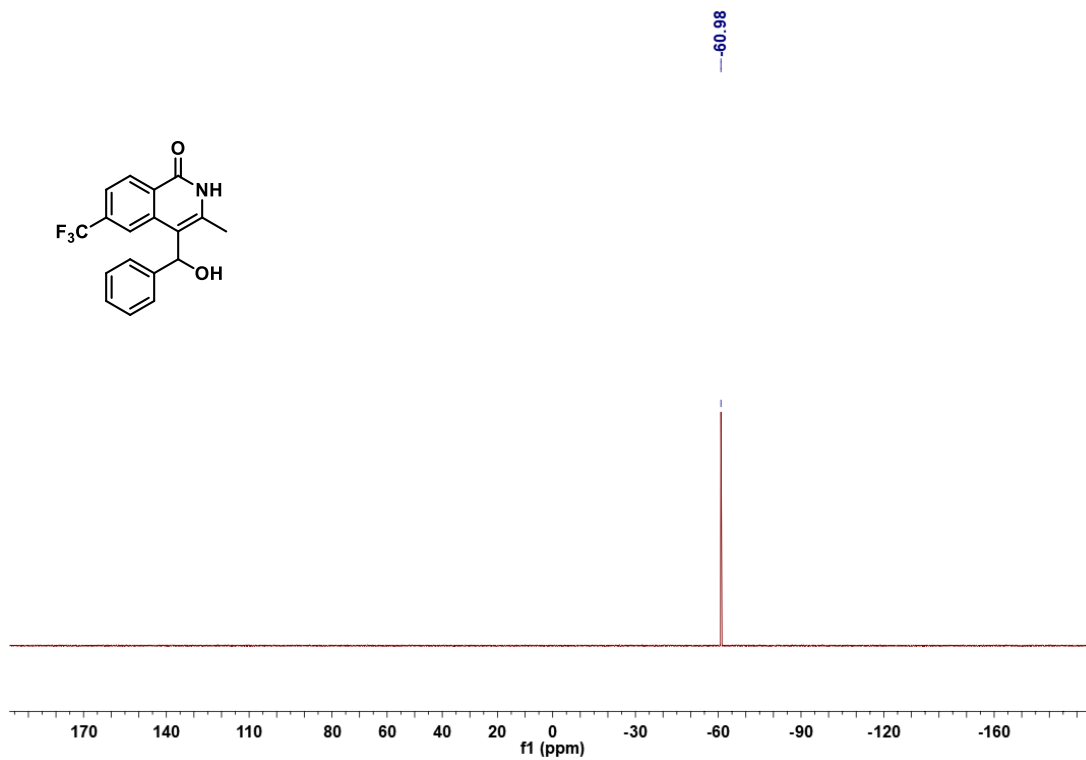

**4-(hydroxy(phenyl)methyl)-3,7-dimethylisoquinolin-1(2H)-one (3a) and  
4-(hydroxy(phenyl)methyl)-3,5-dimethylisoquinolin-1(2H)-one (3a')**

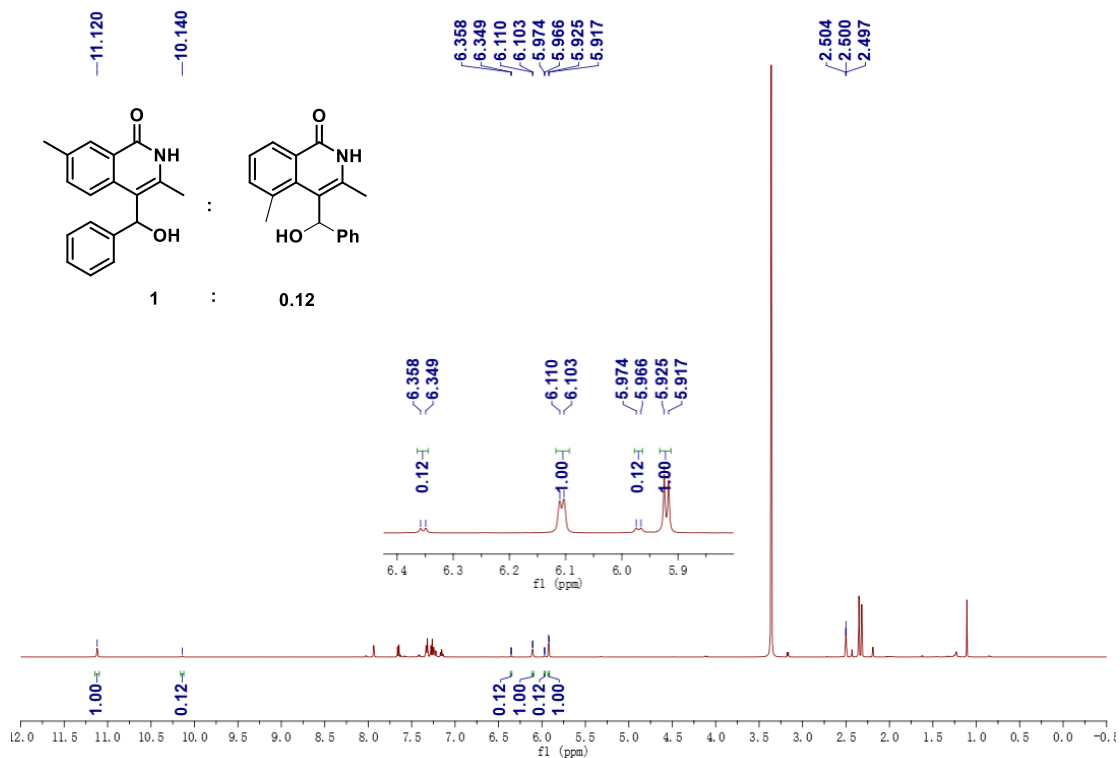

**4-(hydroxy(phenyl)methyl)-3,7-dimethylisoquinolin-1(2H)-one (3a)**

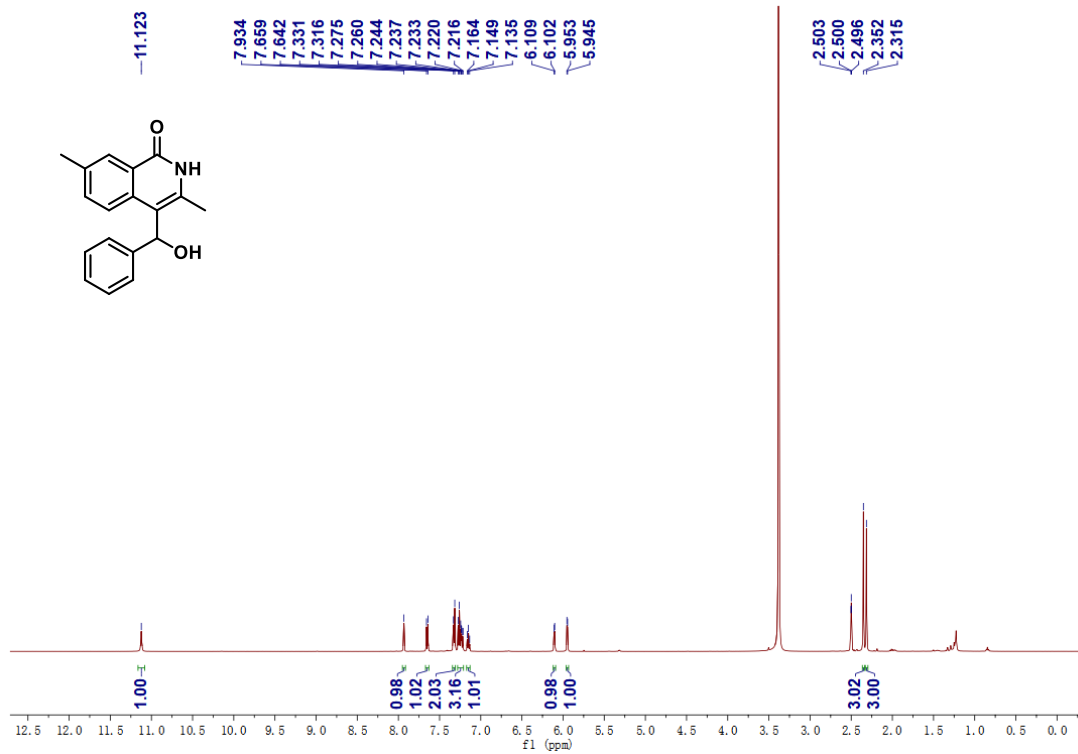

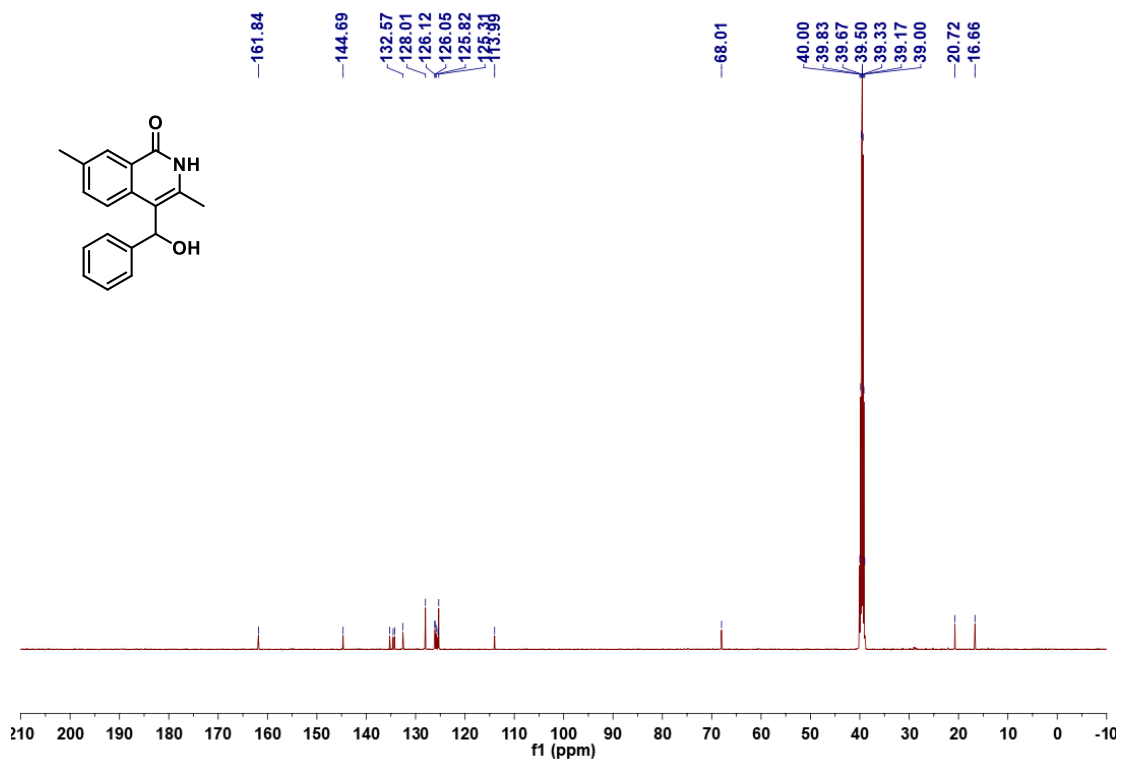

**3-(hydroxy(phenyl)methyl)-4,7-dimethylisoquinolin-1(2H)-one (3a1')**

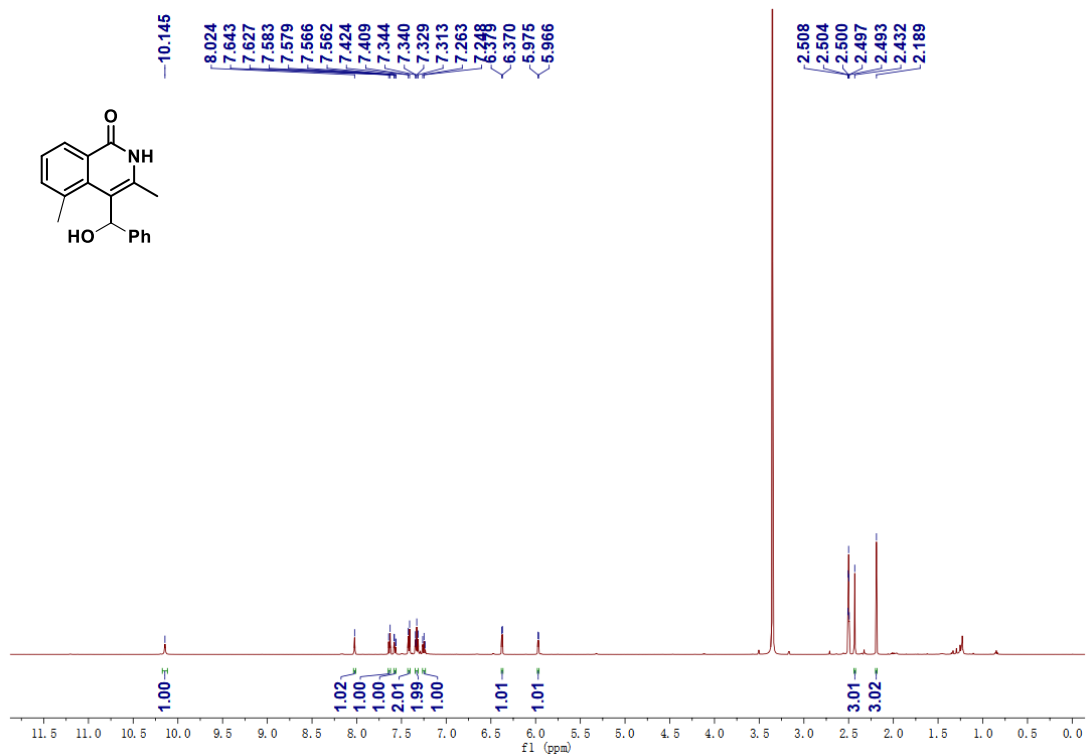

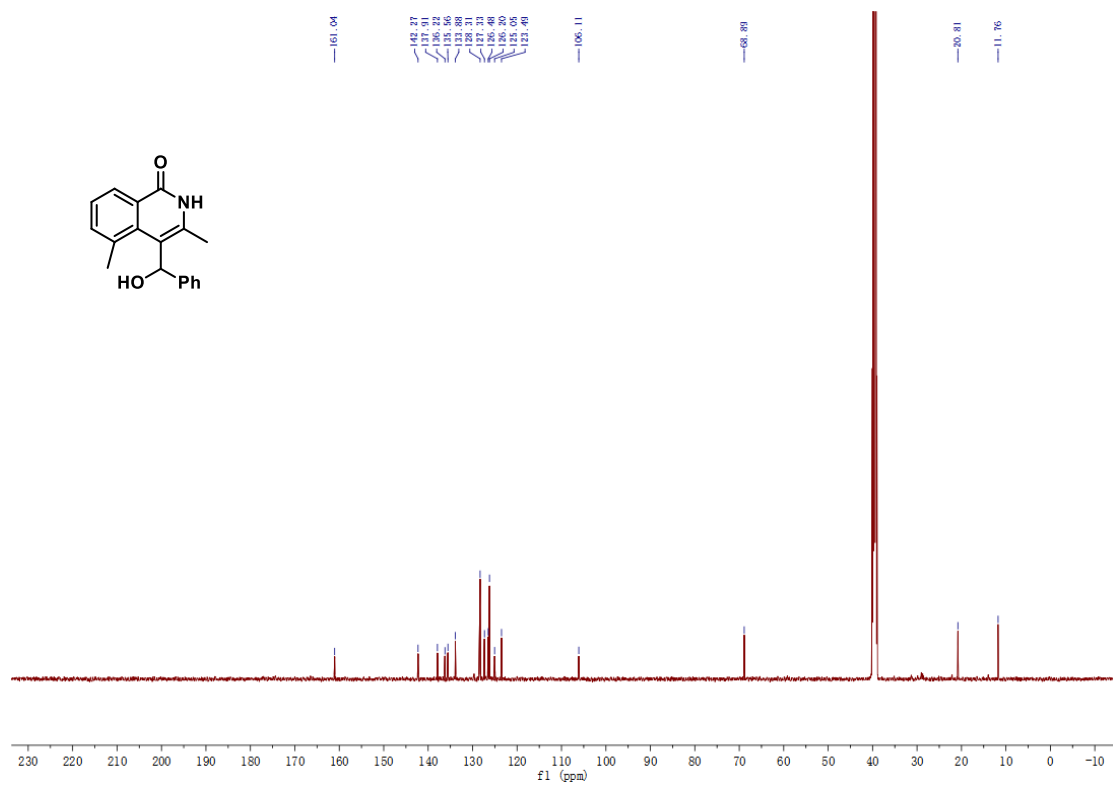

**Crude <sup>1</sup>H-NMR spectra of  
7-bromo-4-(hydroxy(phenyl)methyl)-3-methylisoquinolin-1(2H)-one (3am) and  
7-bromo-4-(hydroxy(phenyl)methyl)-3-methylisoquinolin-1(2H)-one (3am')**

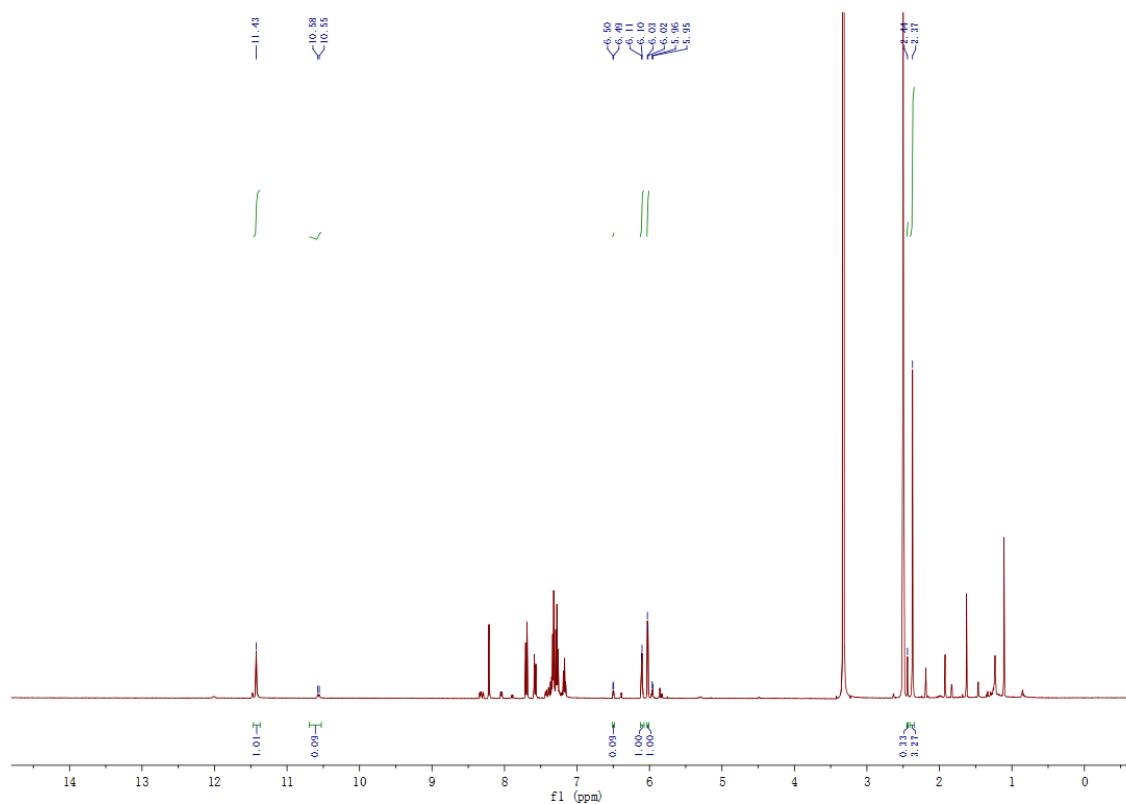

**7-bromo-4-(hydroxy(phenyl)methyl)-3-methylisoquinolin-1(2H)-one (3am)**

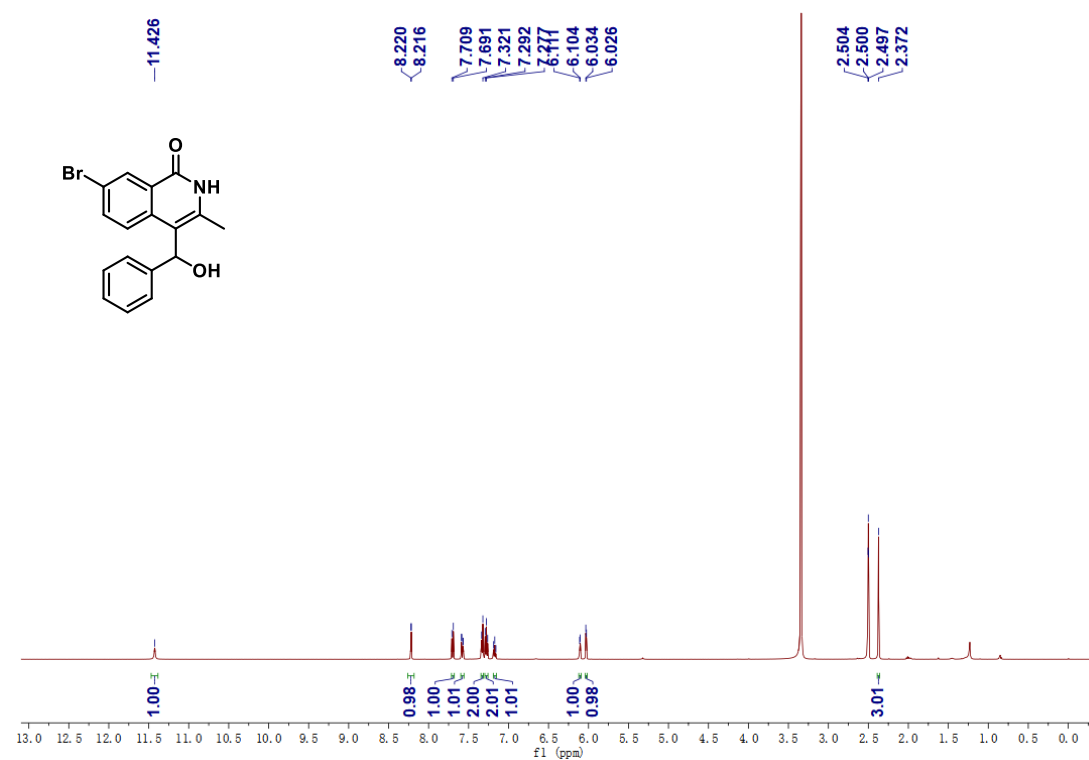

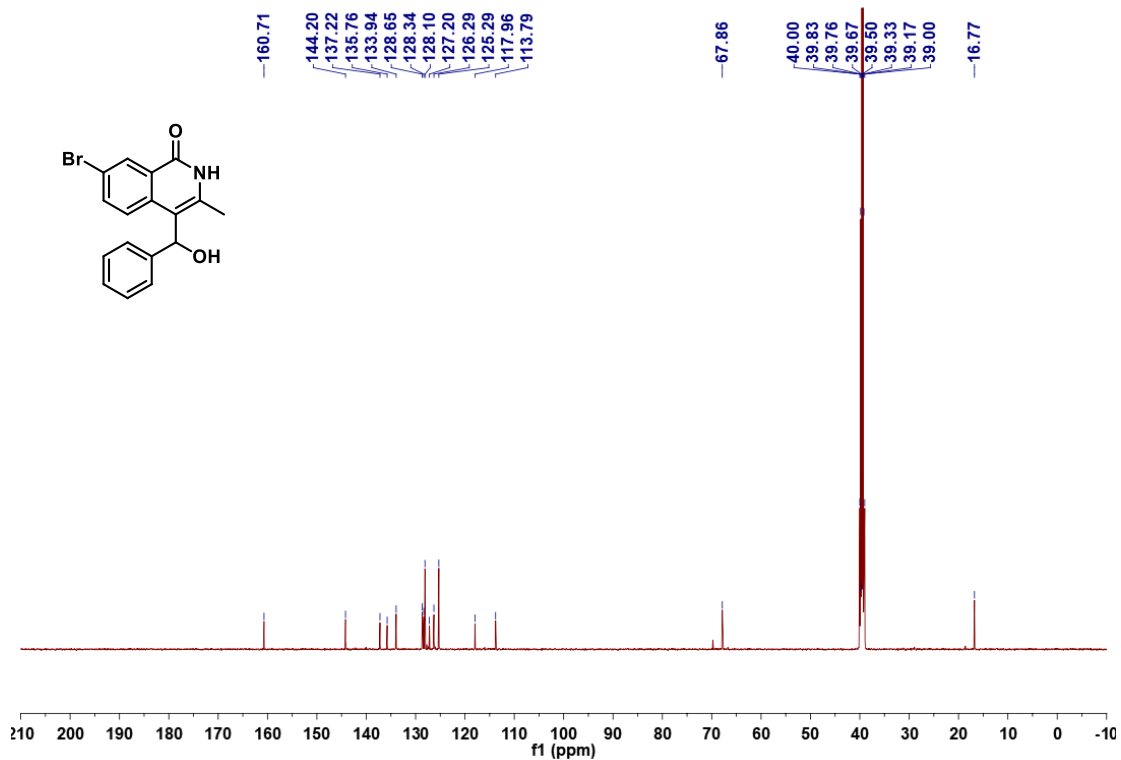

**7-bromo-4-(hydroxy(phenyl)methyl)-3-methylisoquinolin-1(2H)-one (3am')**

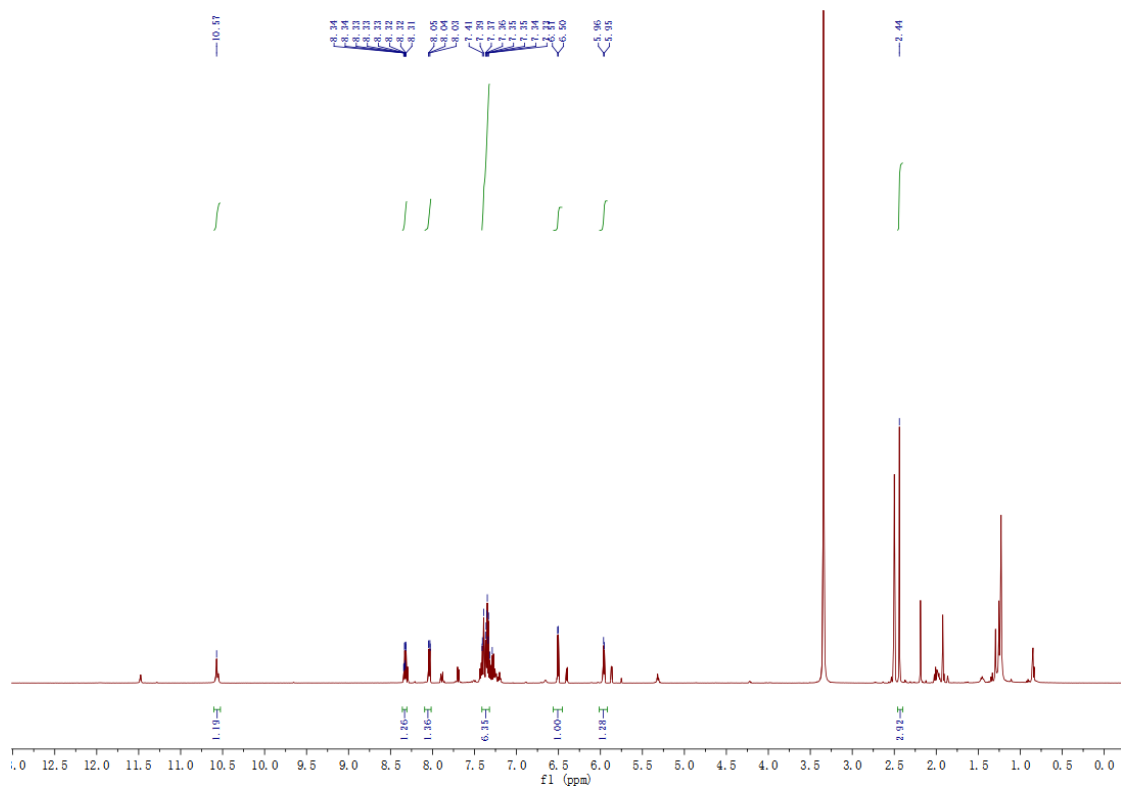

Crude <sup>1</sup>H-NMR spectra of  
**4-(hydroxy(phenyl)methyl)-3-methyl-7-(trifluoromethyl)isoquinolin-1(2H)-one (3an)** and  
**4-(hydroxy(phenyl)methyl)-3-methyl-5-(trifluoromethyl)isoquinolin-1(2H)-one (3an')**

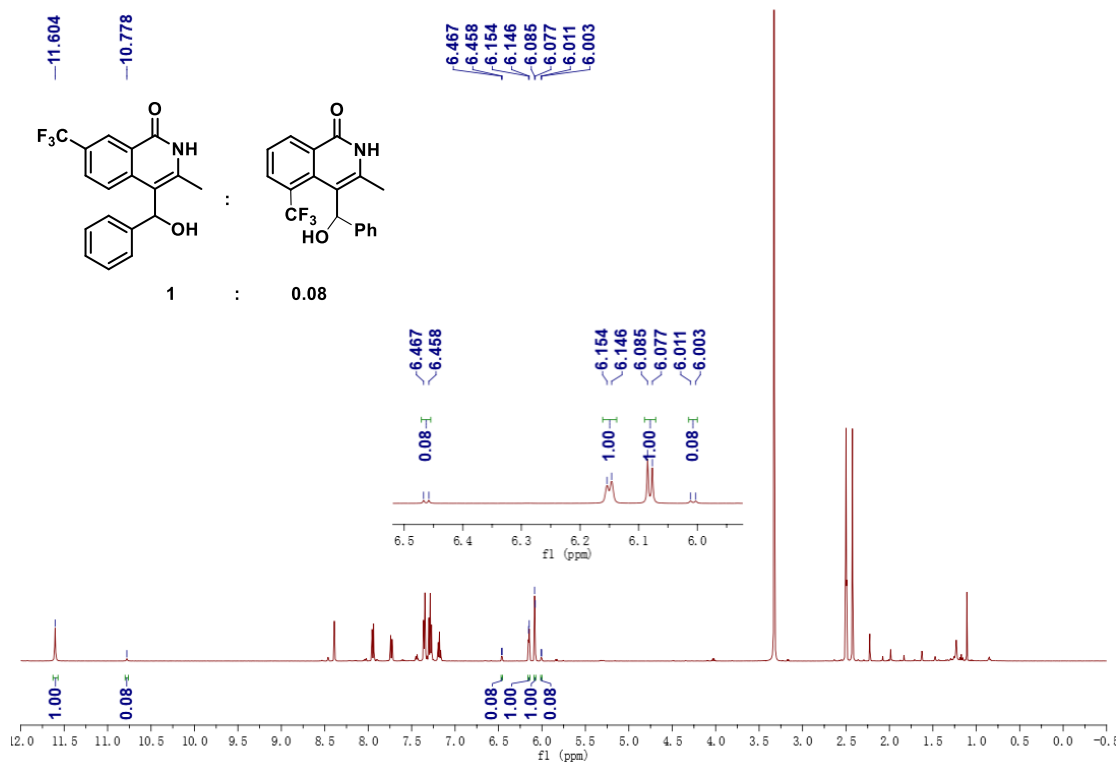

**4-(hydroxy(phenyl)methyl)-3-methyl-7-(trifluoromethyl)isoquinolin-1(2H)-one (3an)**

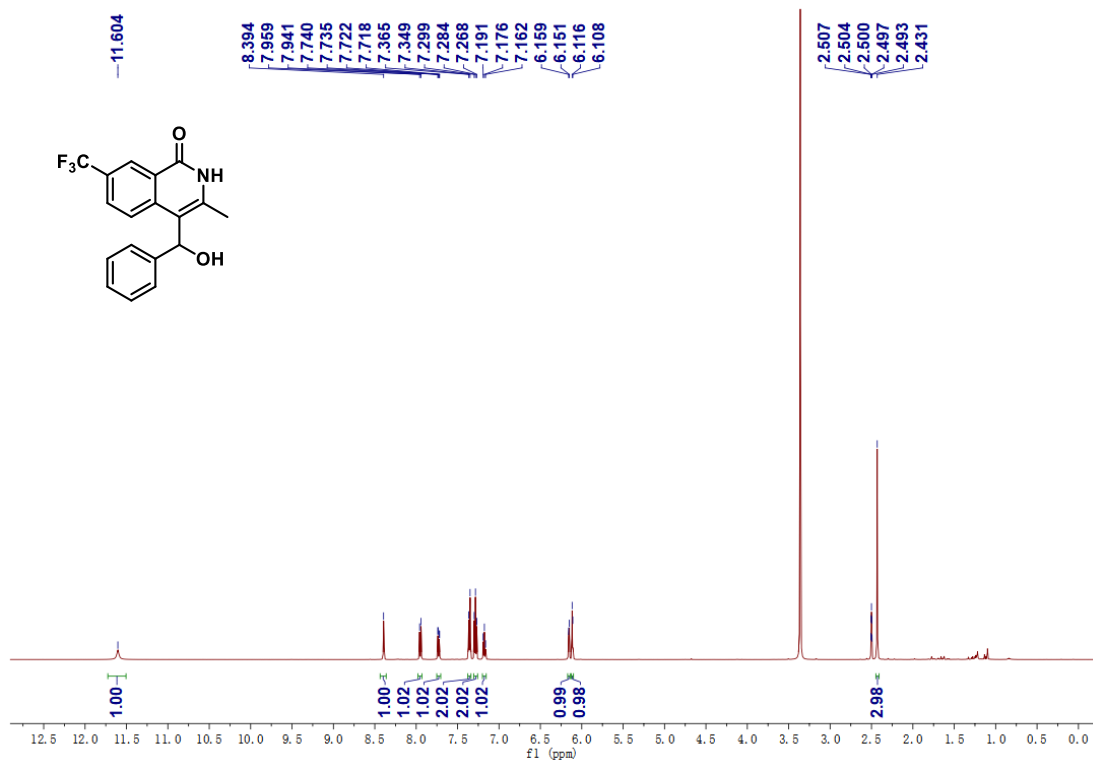

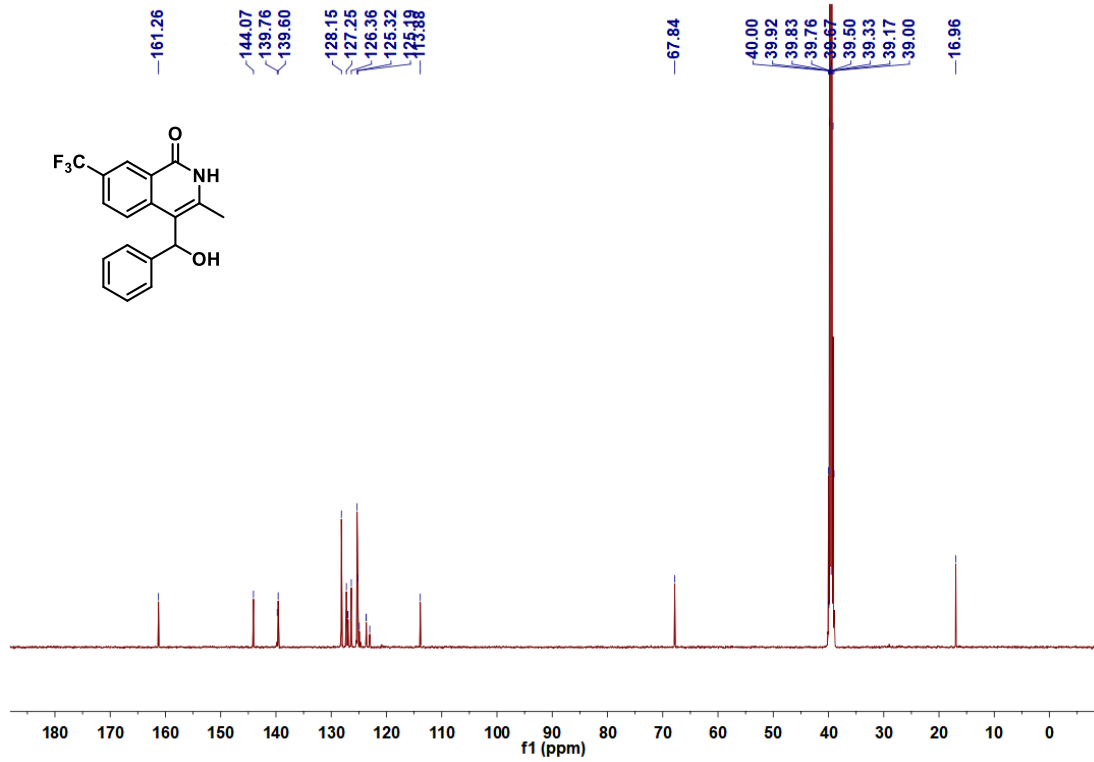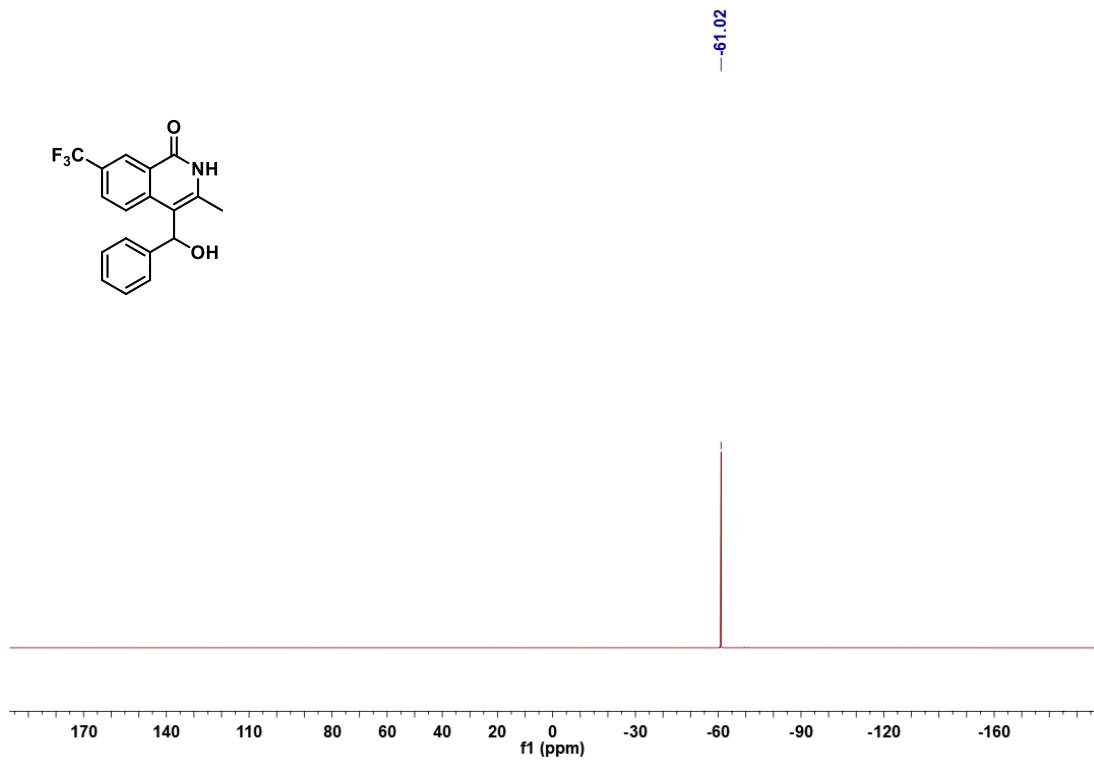



4-(hydroxy(phenyl)methyl)-3-methyl-5-(trifluoromethyl)isoquinolin-1(2H)-one (3an')

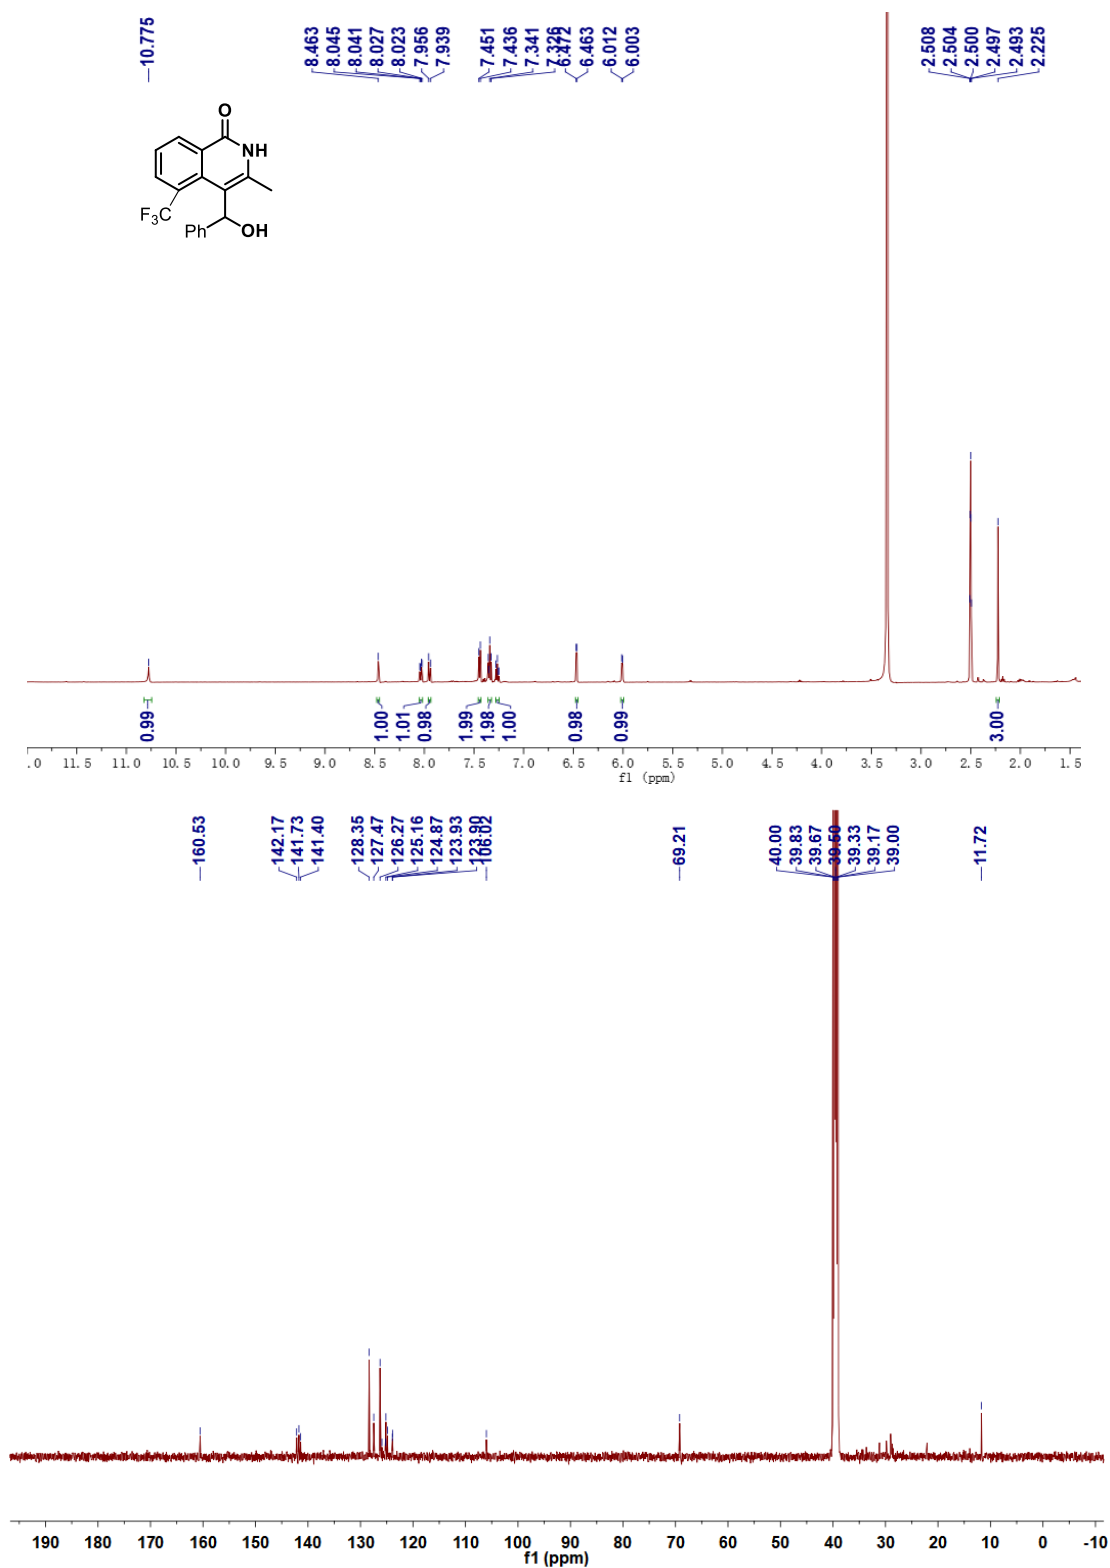

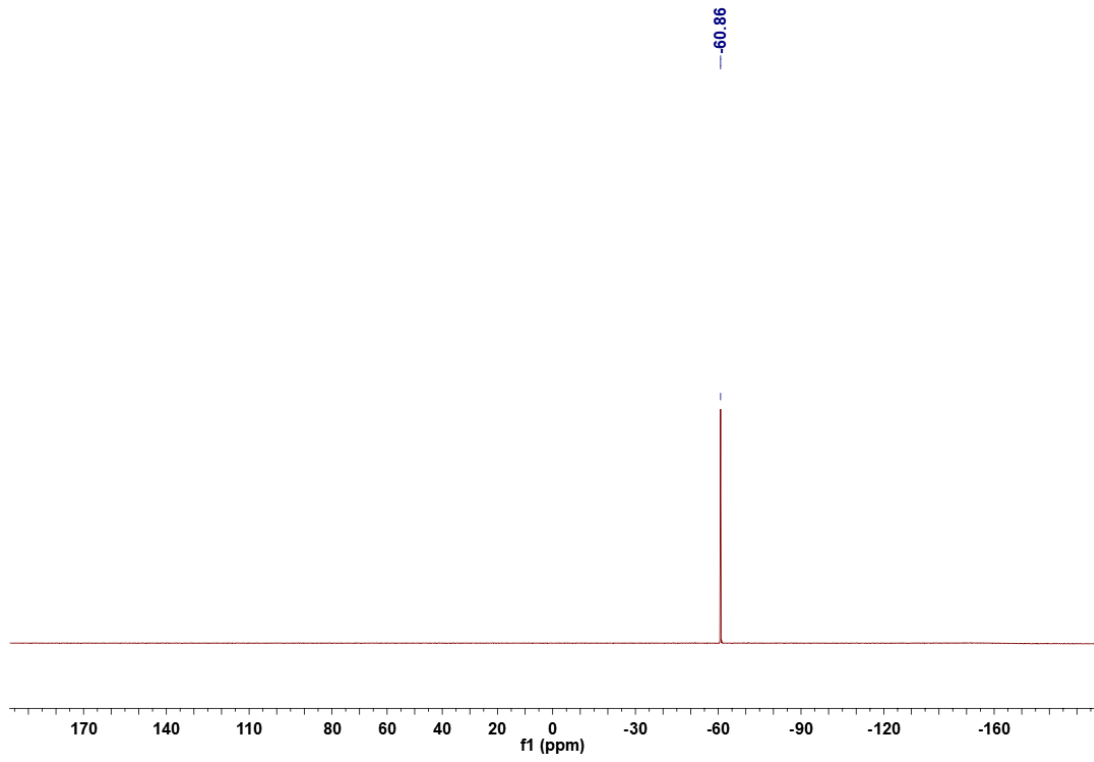

### 4-(hydroxy(phenyl)methyl)-3,8-dimethylisoquinolin-1(2H)-one (3ao)

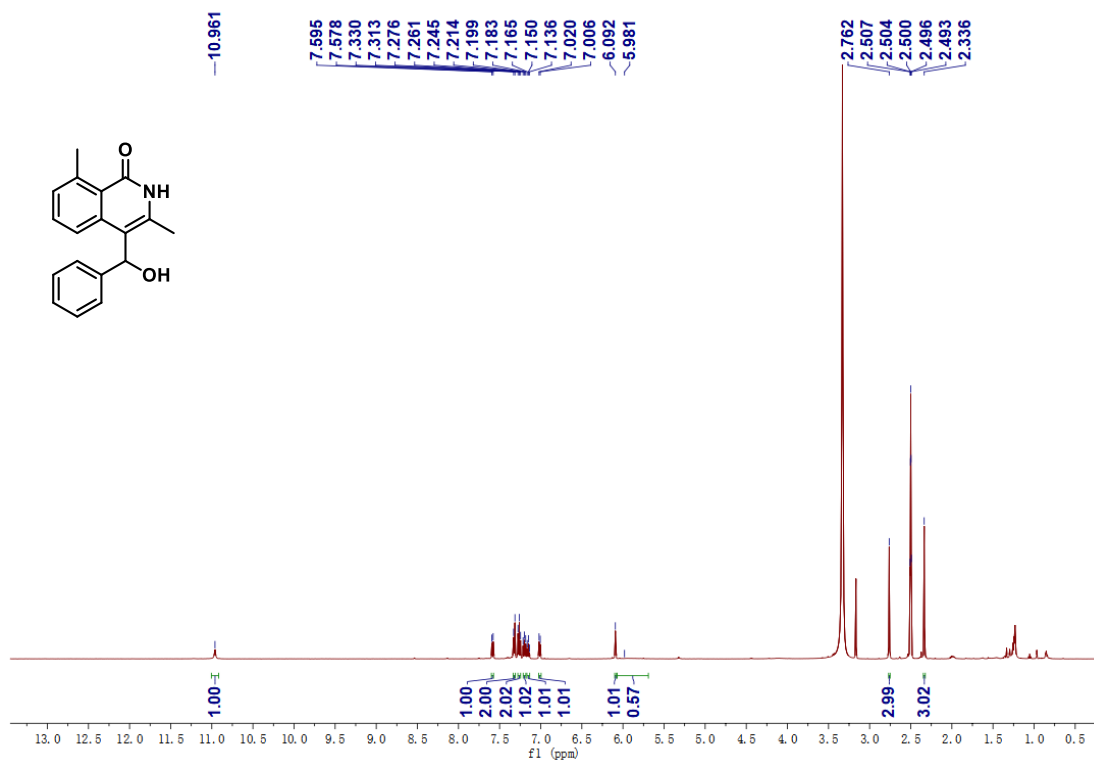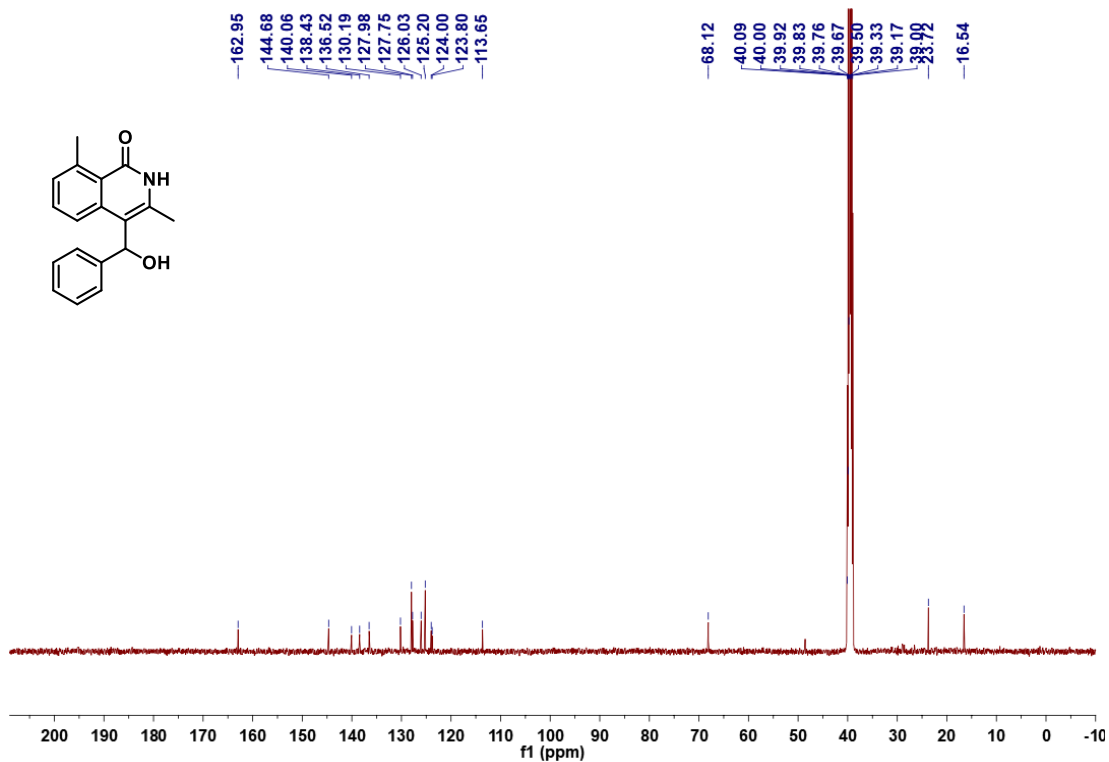

**8-fluoro-4-(hydroxy(phenyl)methyl)-3-methylisoquinolin-1(2H)-one (3ap)**

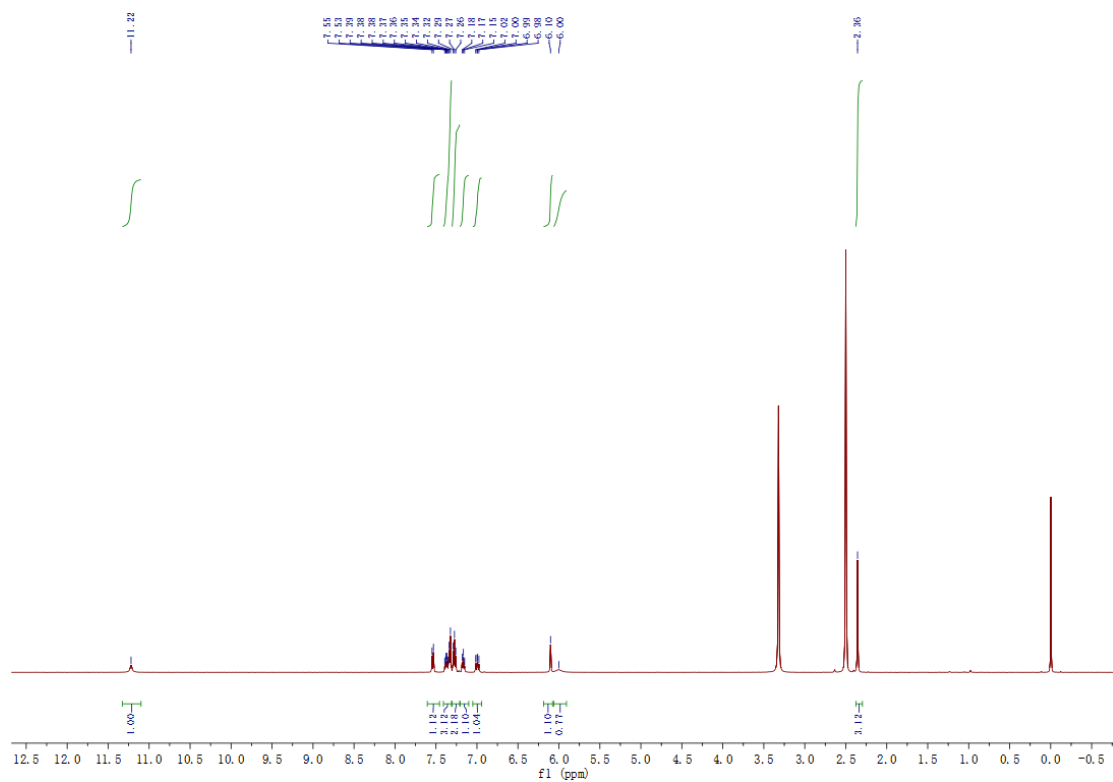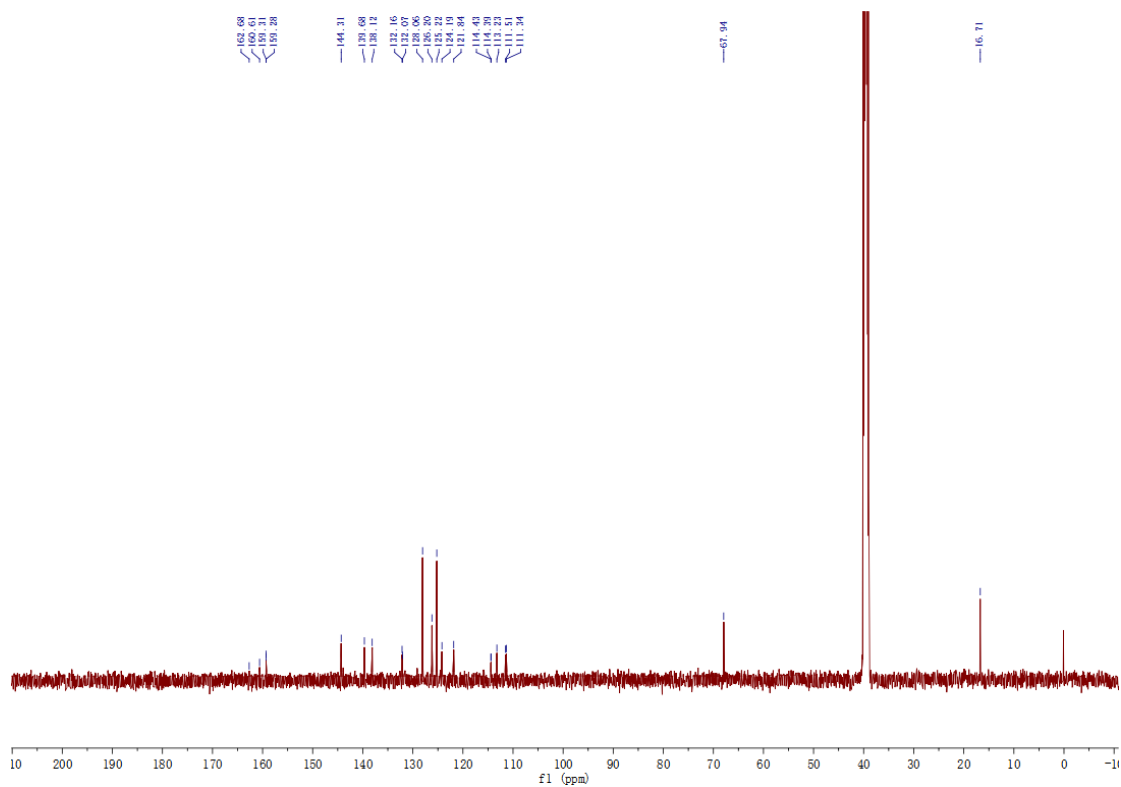

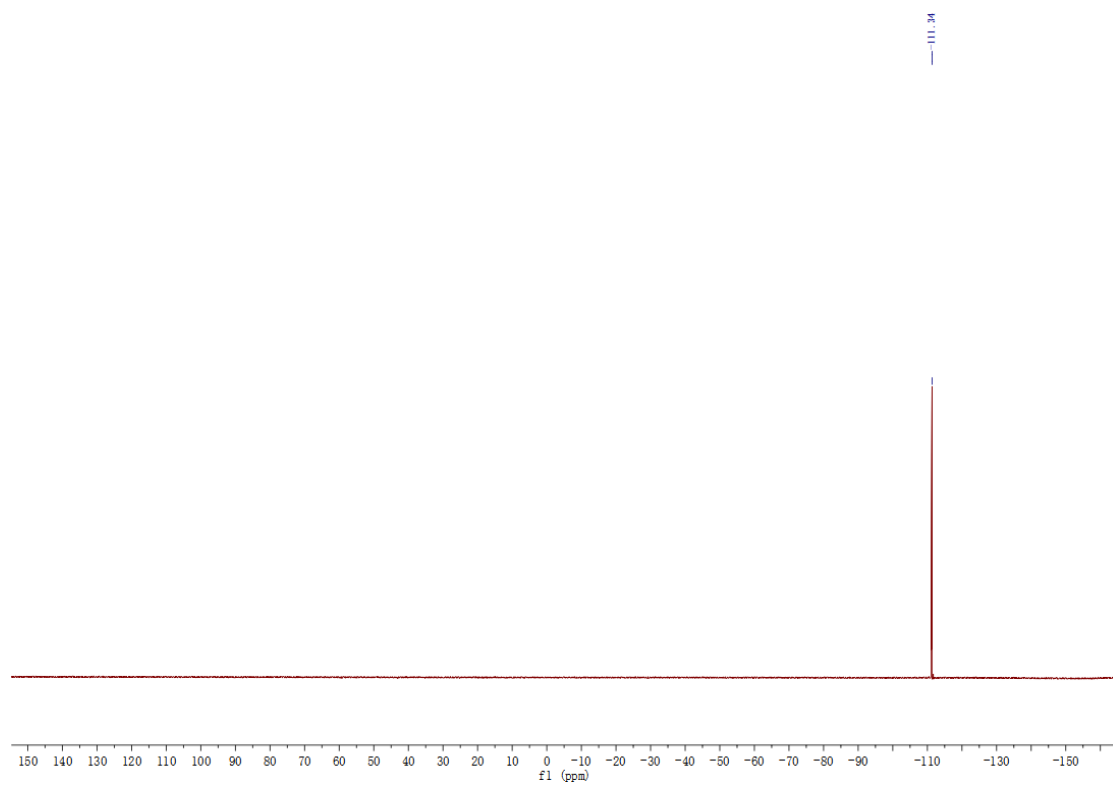

4-(hydroxy(phenyl)methyl)-3-methylbenzo[*g*]isoquinolin-1(2*H*)-one (3aq)

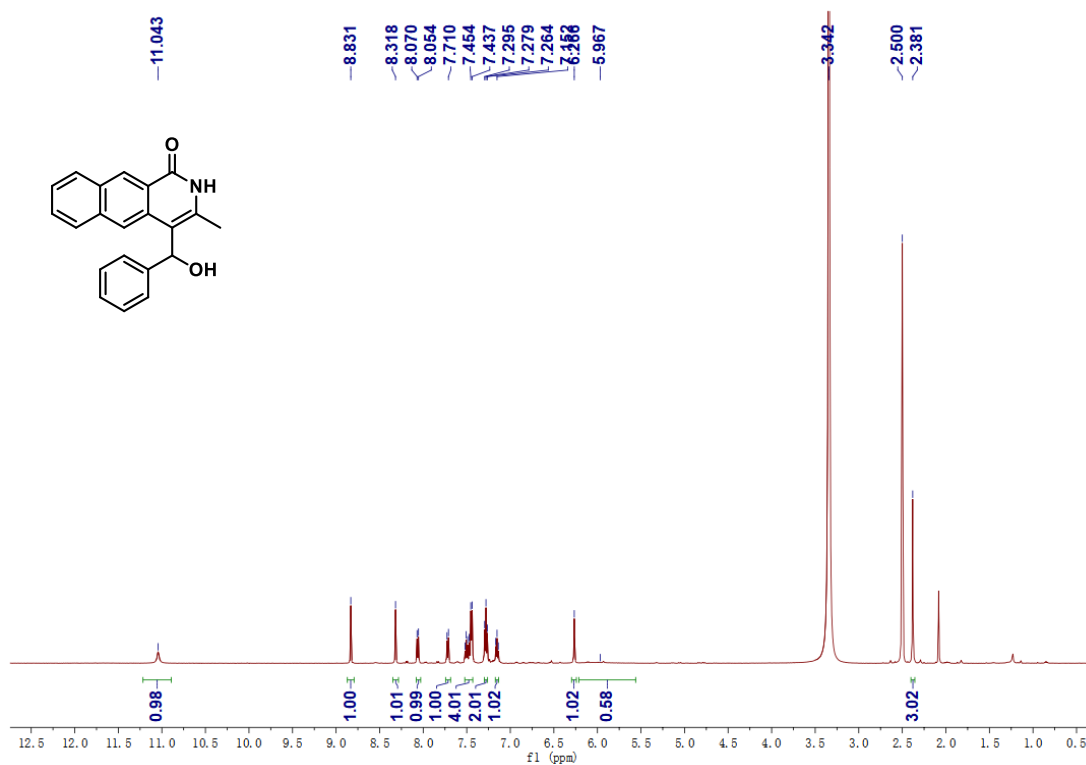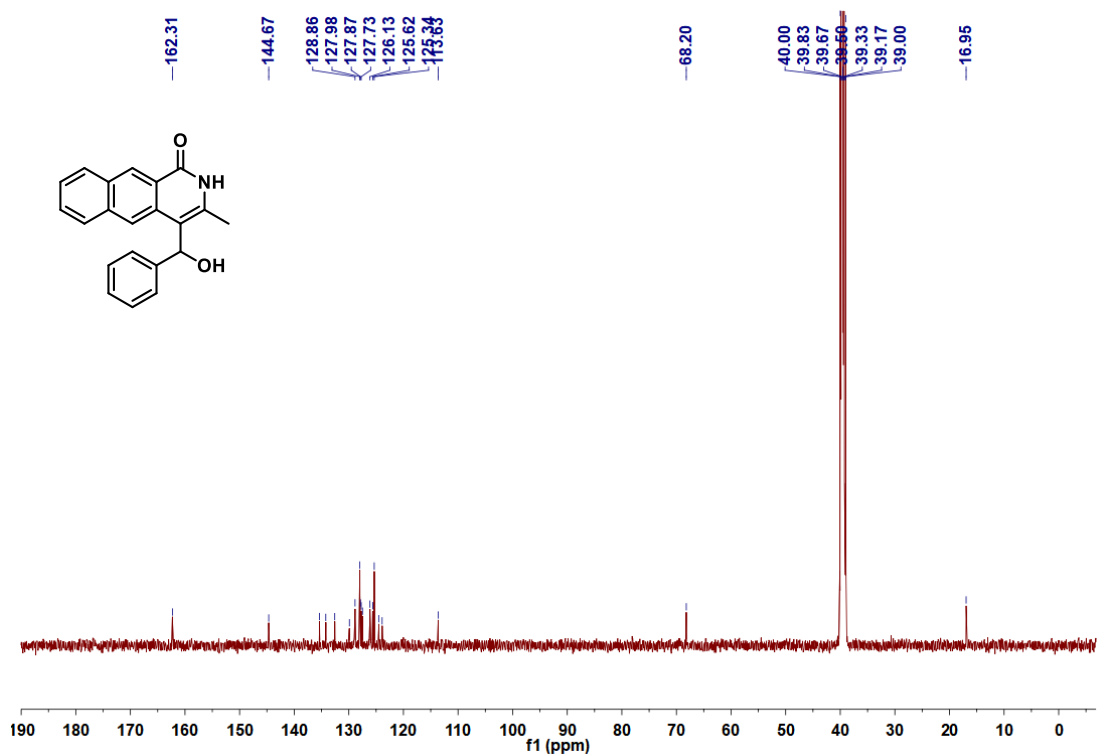

### 4-(hydroxy(phenyl)methyl)-5-methylfuro[2,3-c]pyridin-7(6H)-one (3ar)

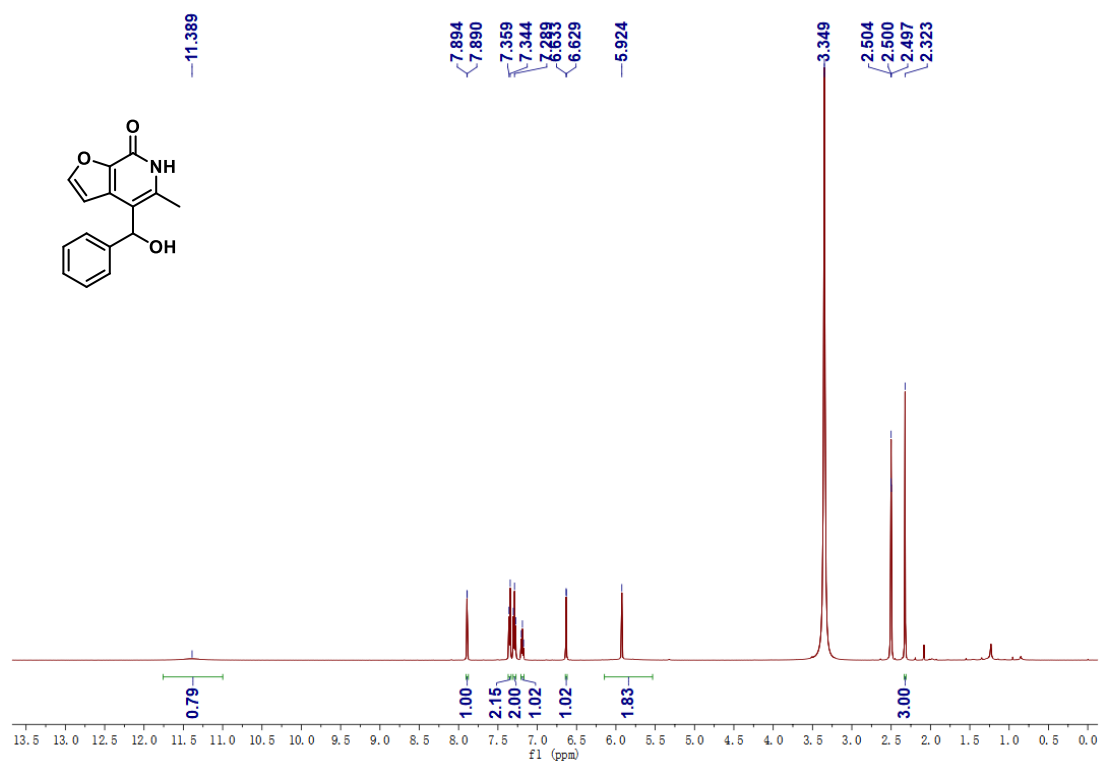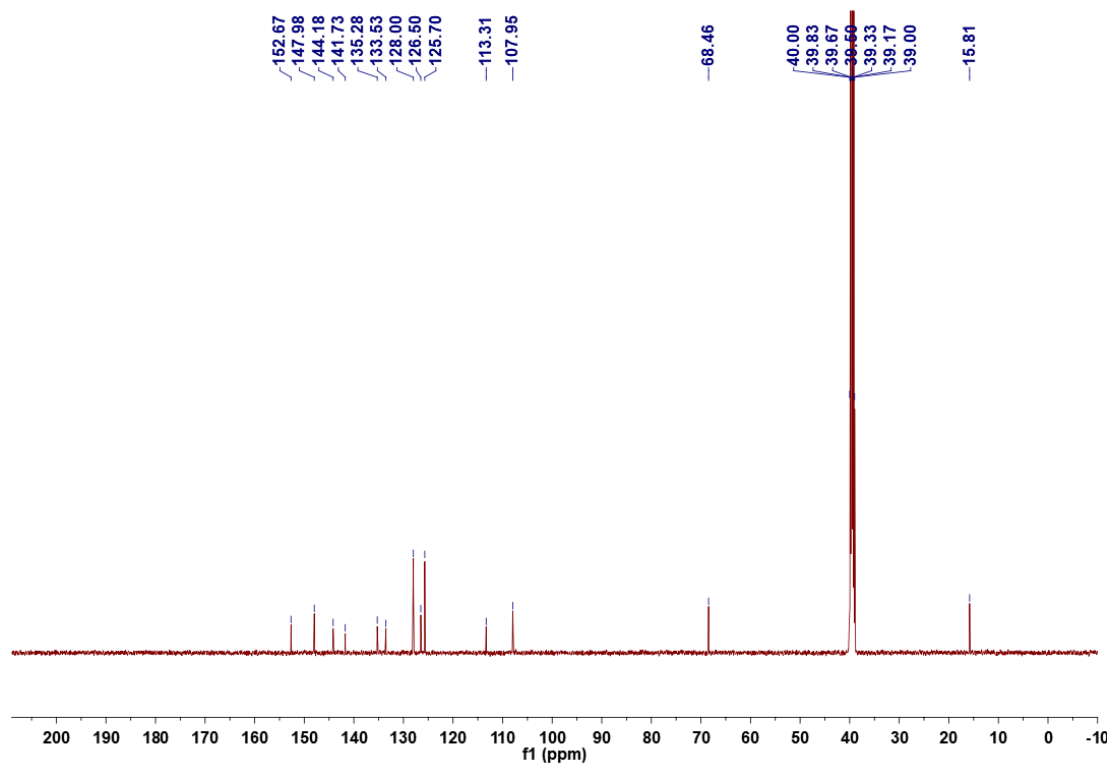

### 4-(hydroxy(phenyl)methyl)-5-methylthieno[2,3-c]pyridin-7(6H)-one (3as)

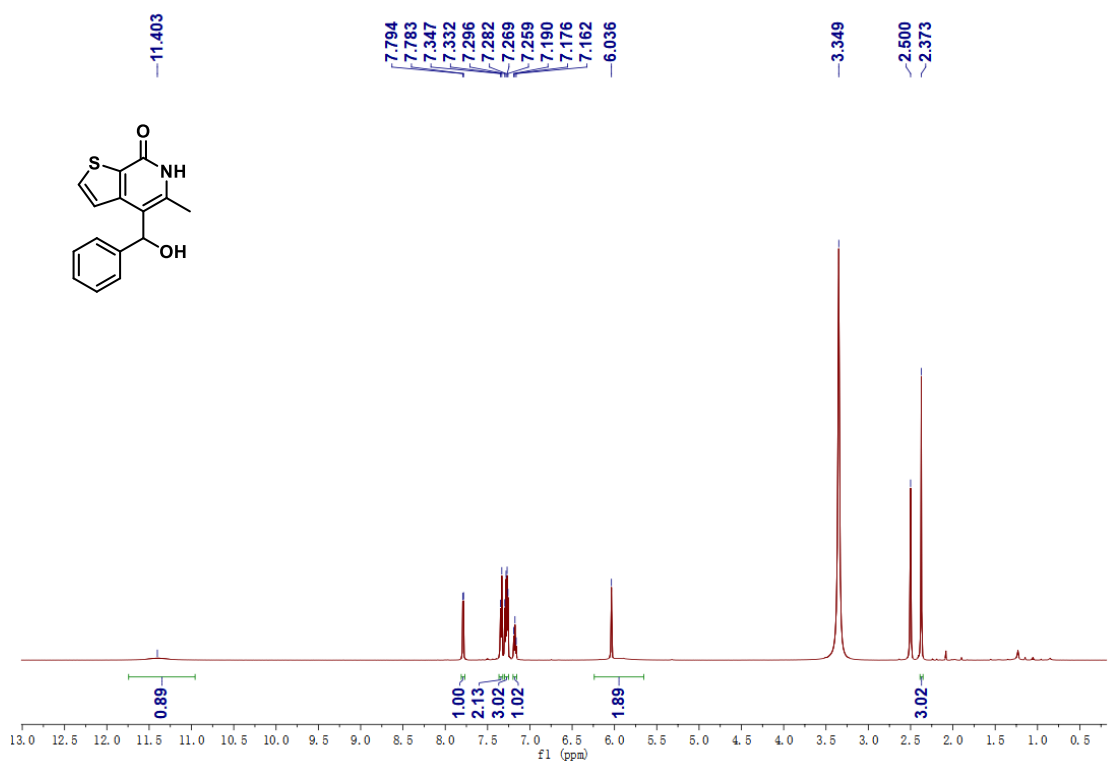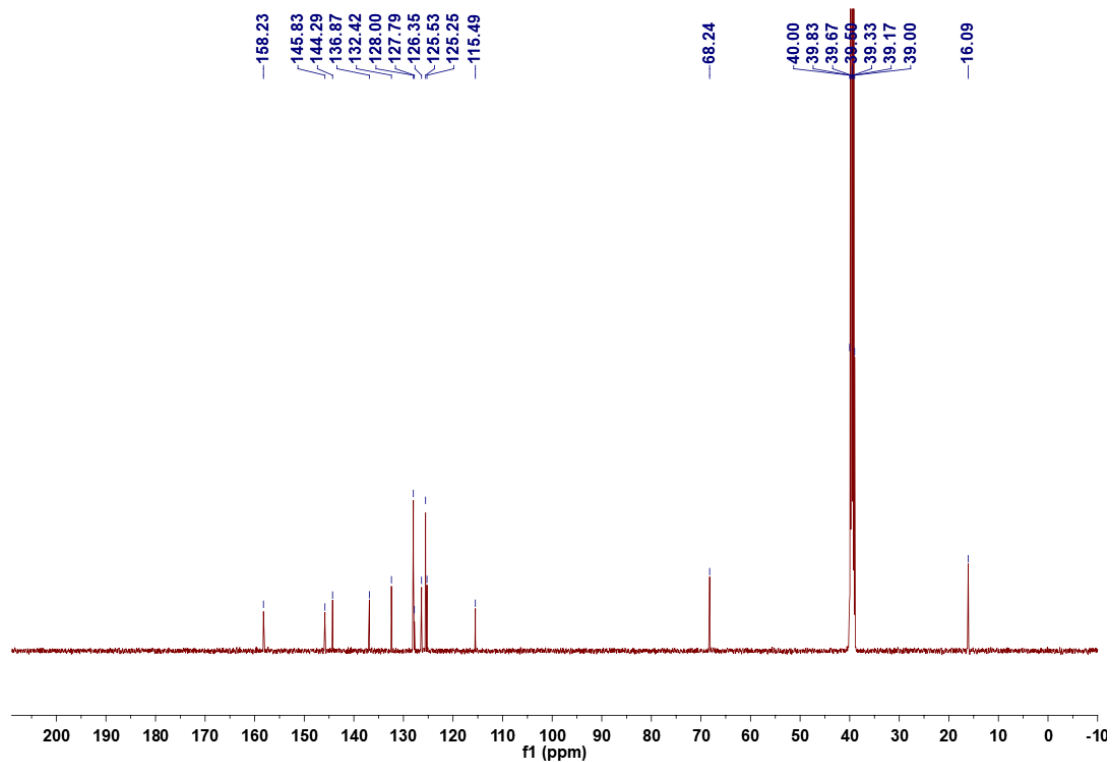



### 4-(hydroxy(phenyl)methyl)-3-methylbenzofuro[2,3-c]pyridin-1(2H)-one (3at)

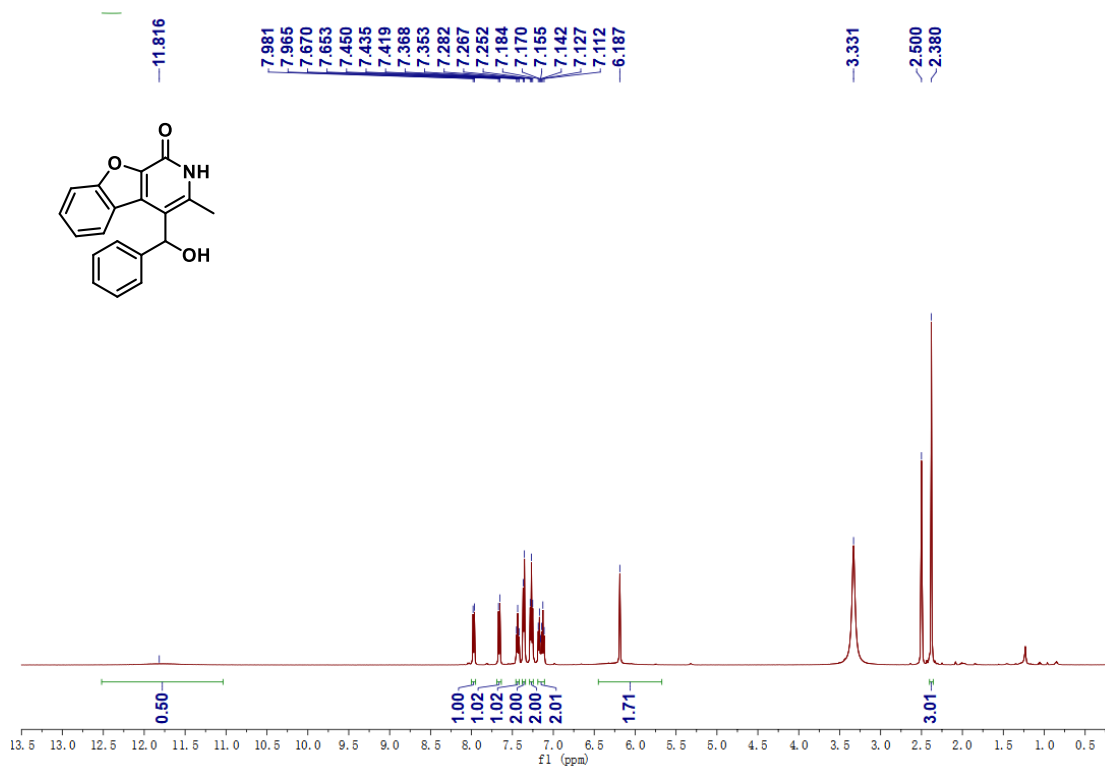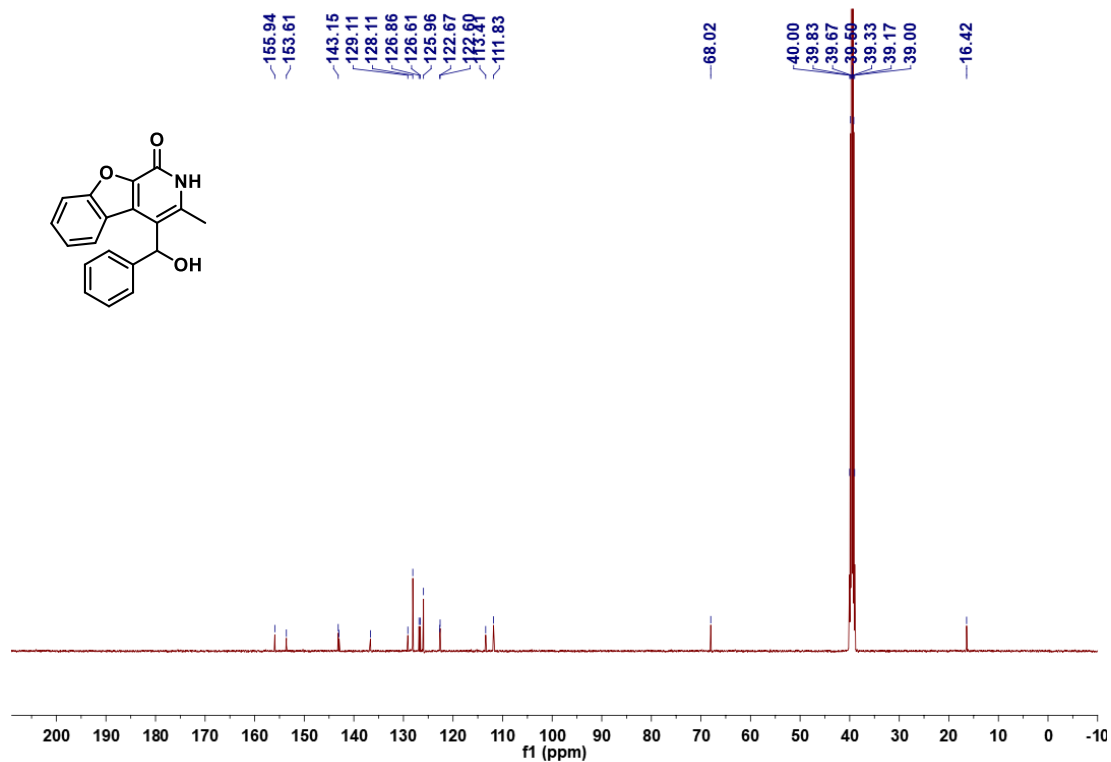

### 4-(hydroxy(p-tolyl)methyl)-3-methylisoquinolin-1(2H)-one (3au)

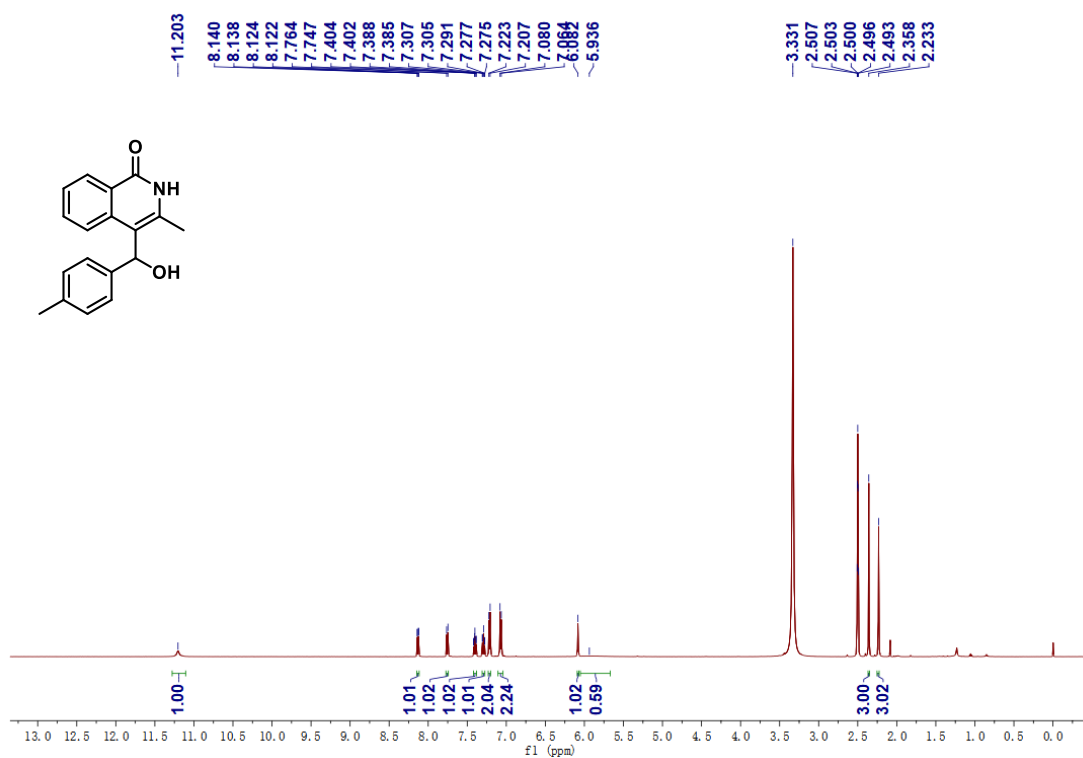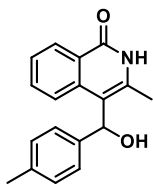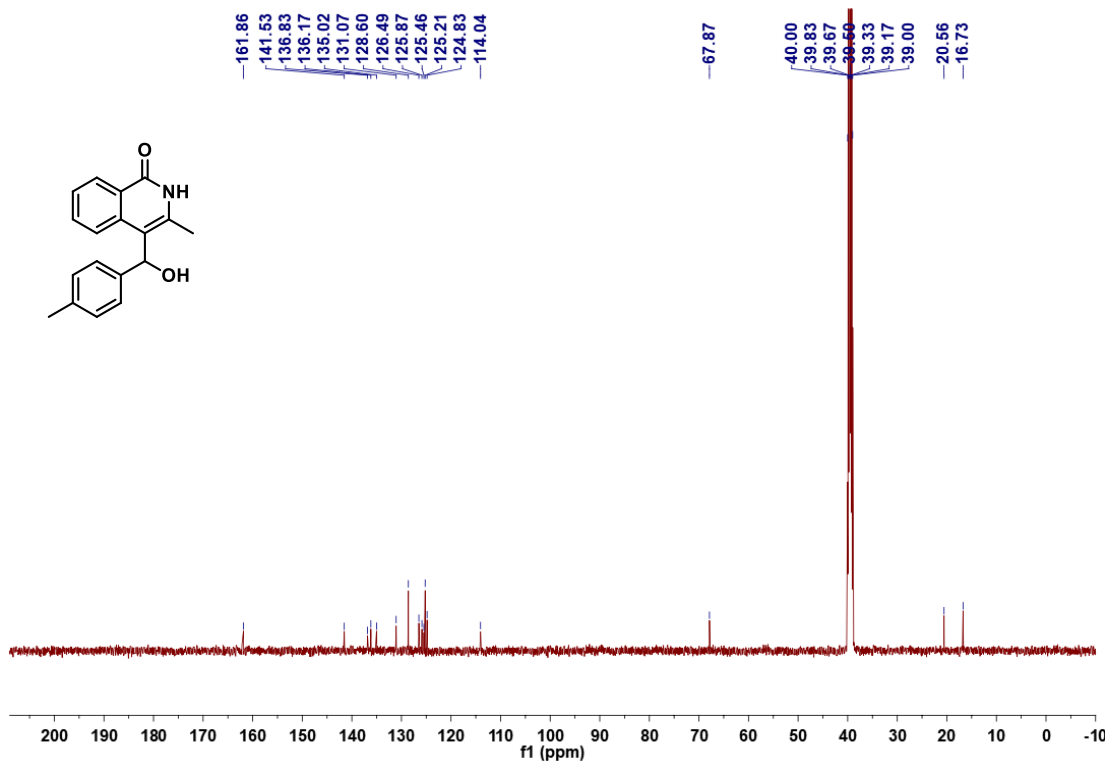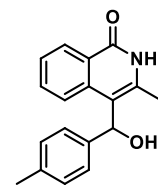

### 4-((4-(tert-butyl)phenyl)(hydroxy)methyl)-3-methylisoquinolin-1(2H)-one (3av)

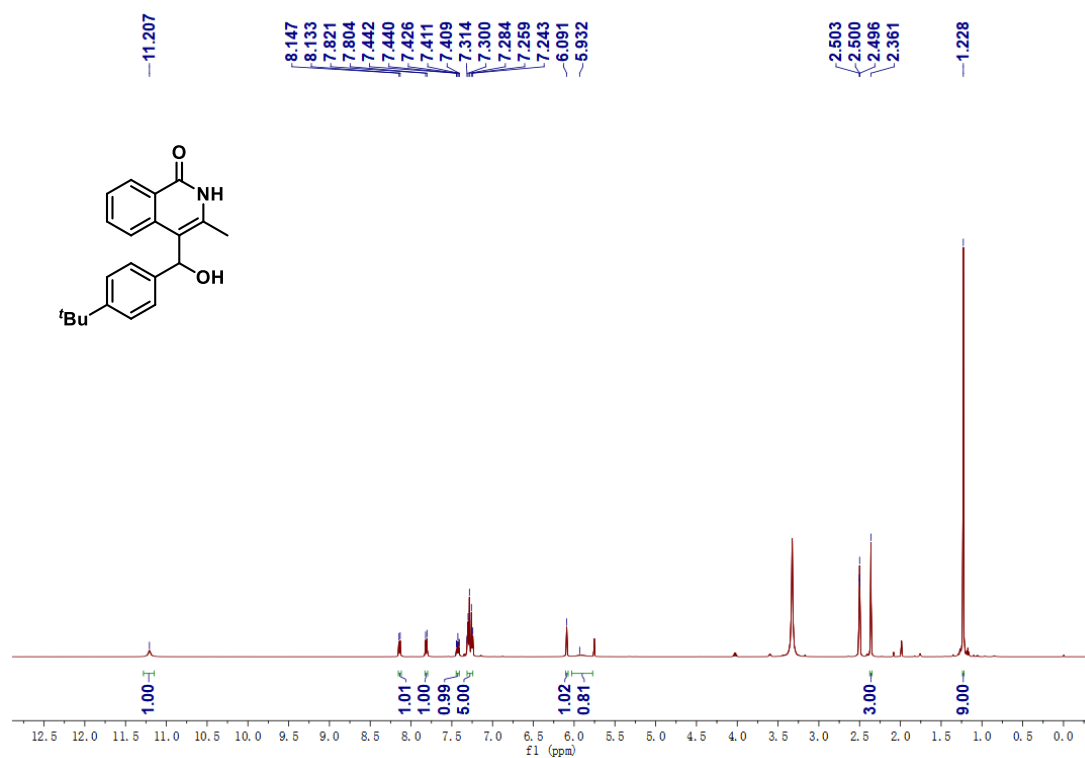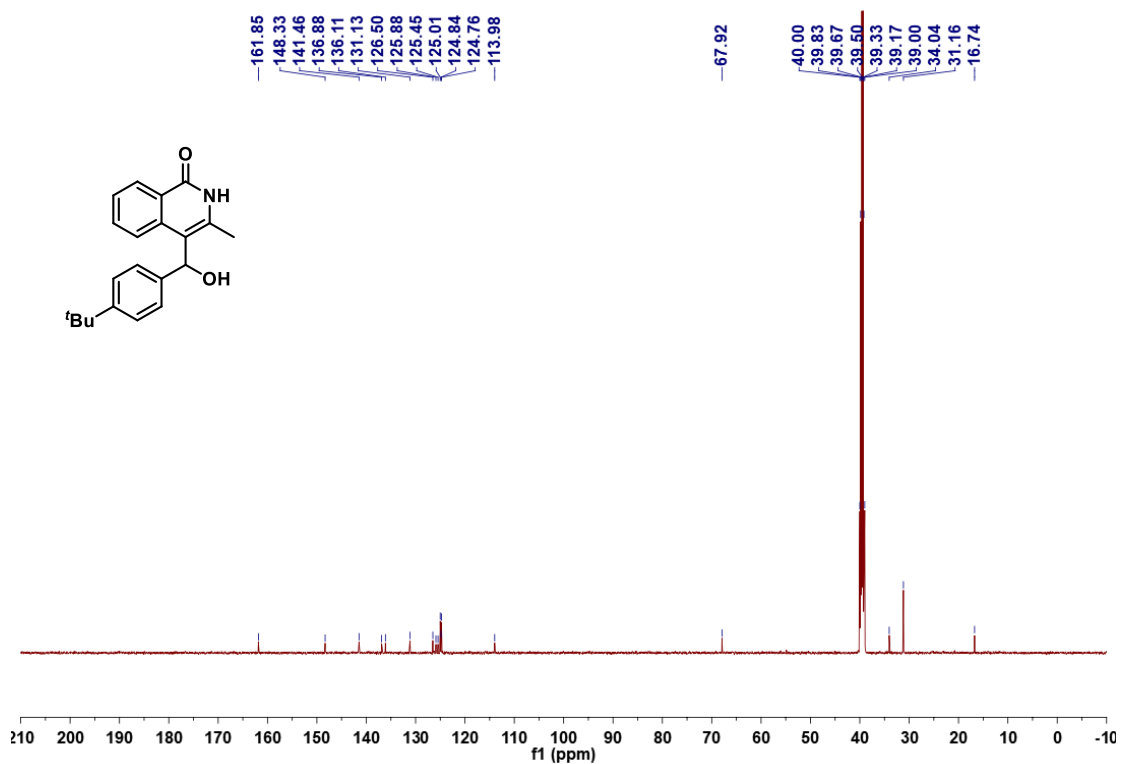

4-(hydroxy(4-methoxyphenyl)methyl)-3-methylisoquinolin-1(2H)-one (3aw)

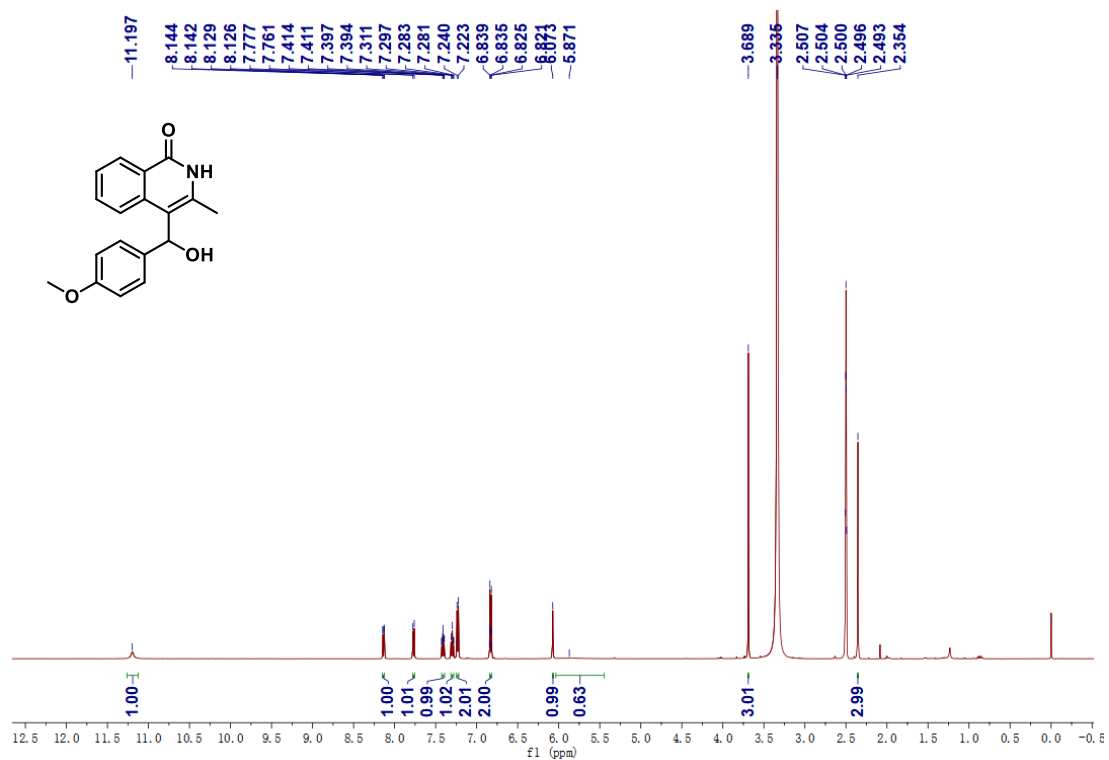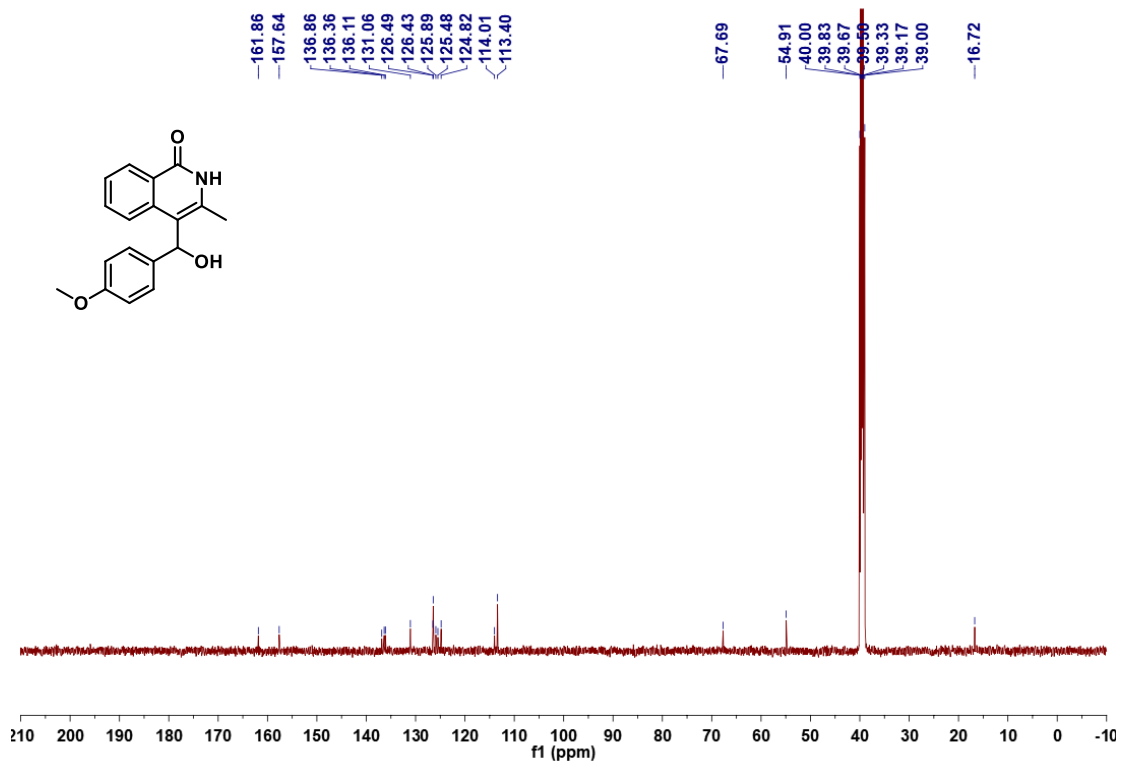

4-((4-fluorophenyl)(hydroxy)methyl)-3-methylisoquinolin-1(2H)-one (3ax)

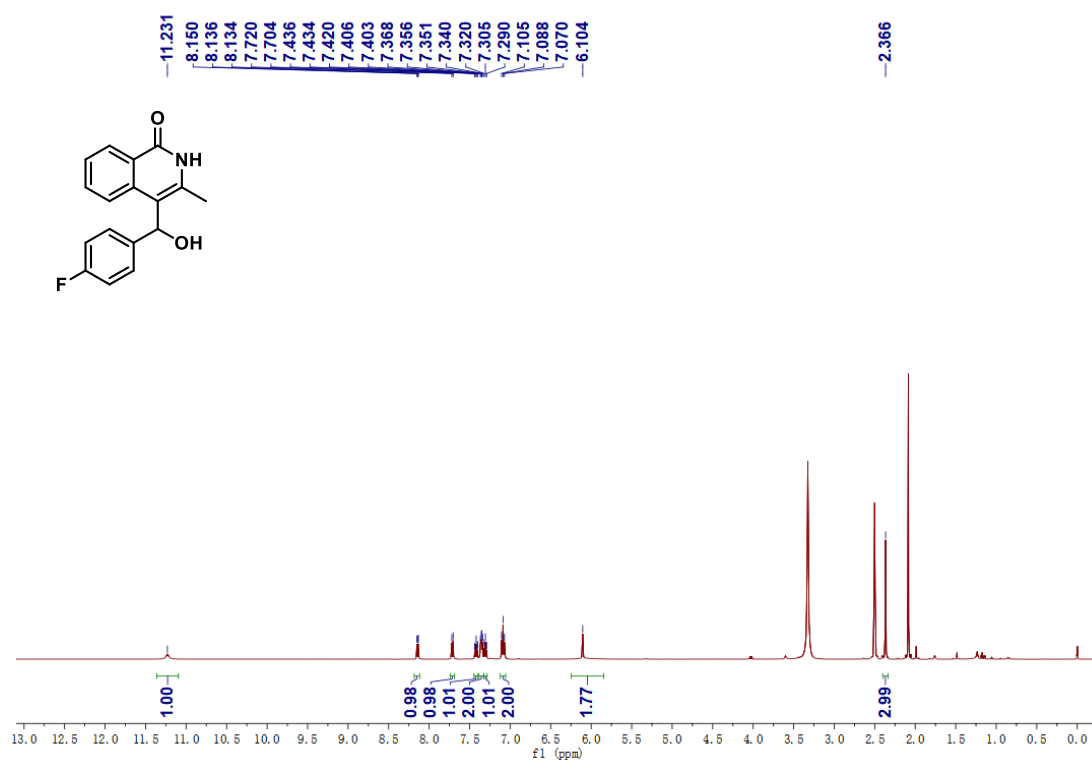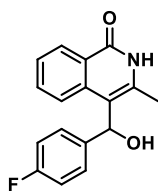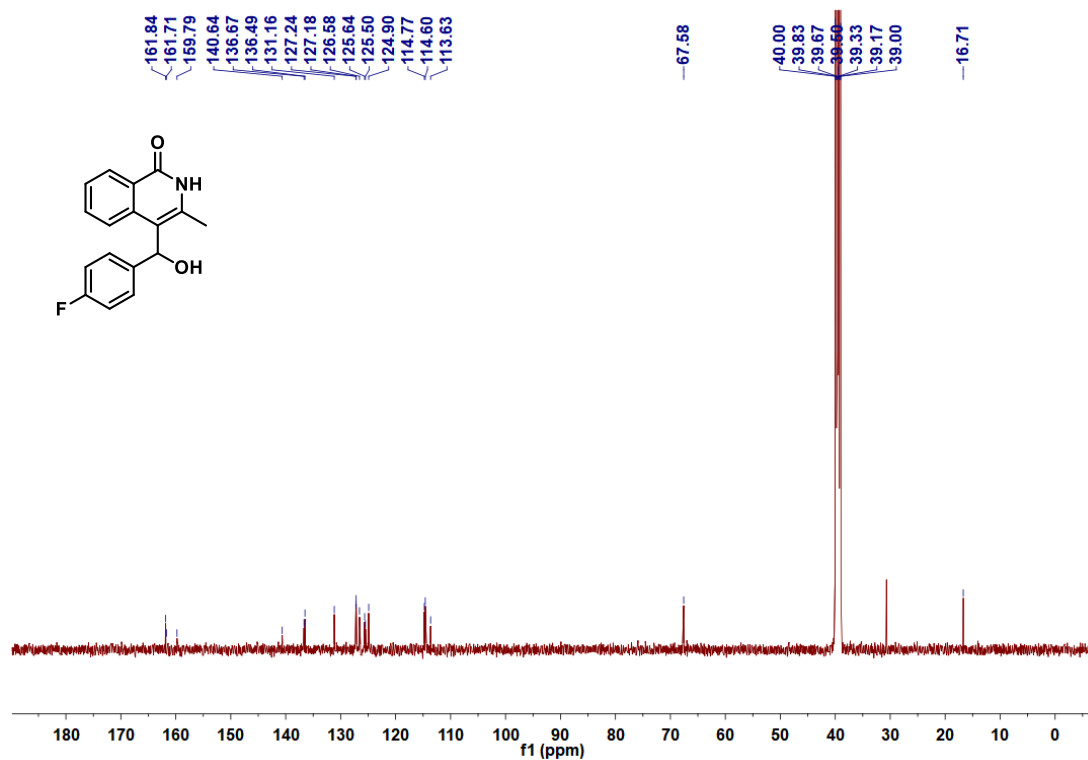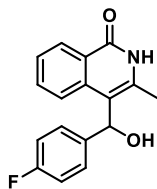

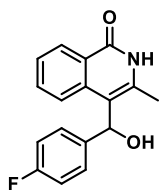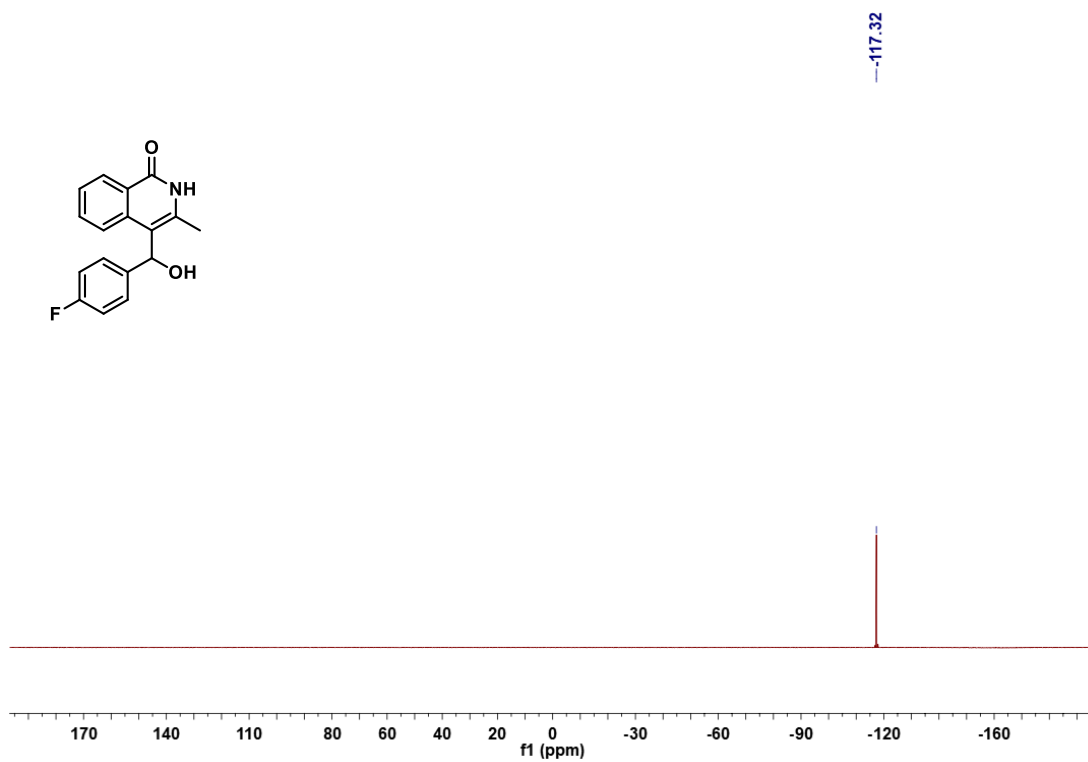

4-((4-bromophenyl)(hydroxy)methyl)-3-methylisoquinolin-1(2H)-one (3ay)

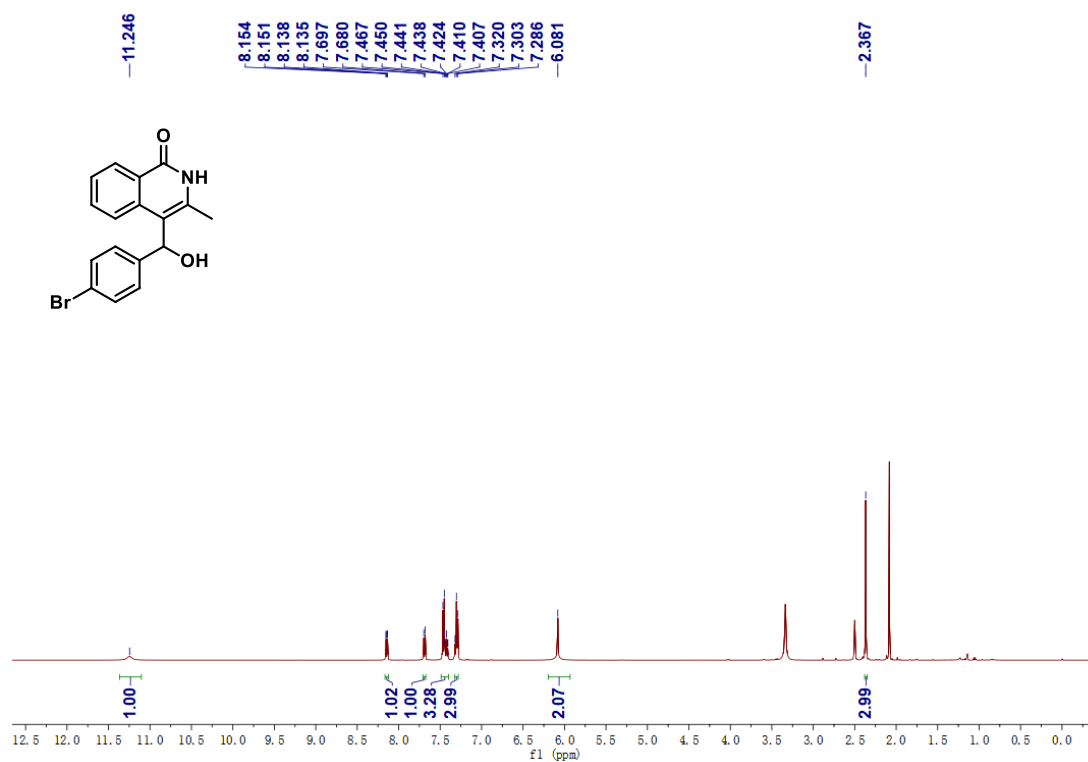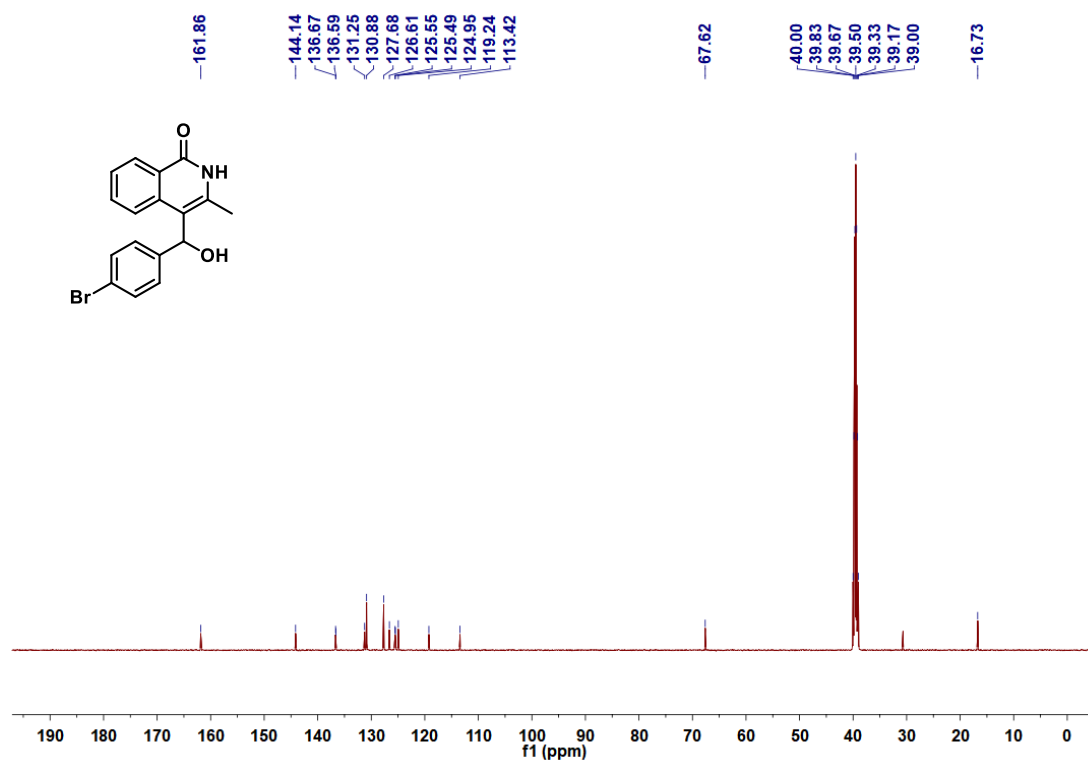

4-(hydroxy(3-methyl-1-oxo-1,2-dihydroisoquinolin-4-yl)methyl)benzonitrile (3az)

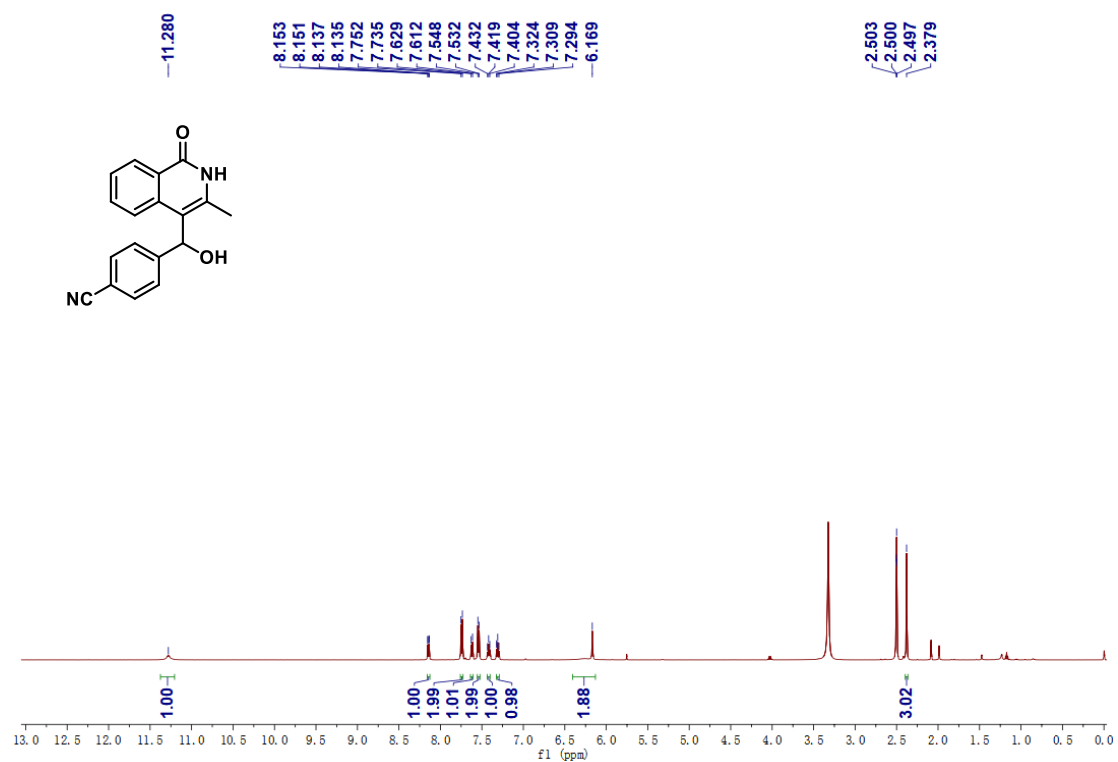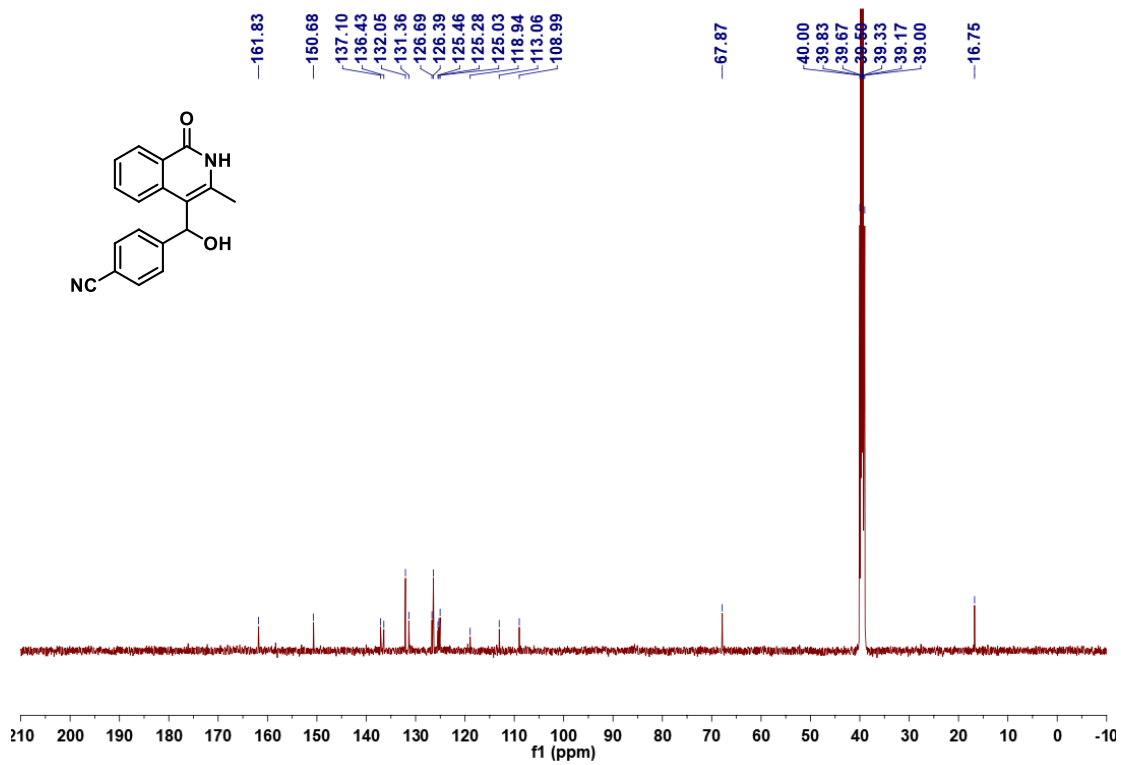



4-(hydroxy(3-methyl-1-oxo-1,2-dihydroisoquinolin-4-yl)methyl)benzonitrile (3ba)

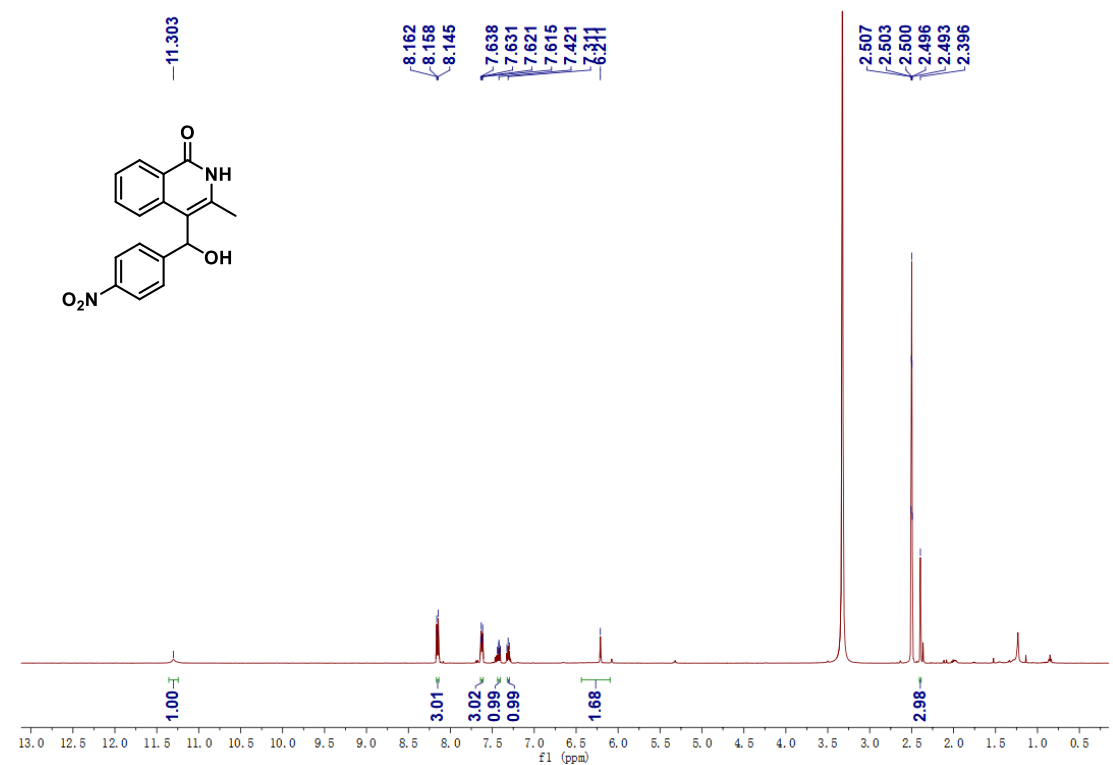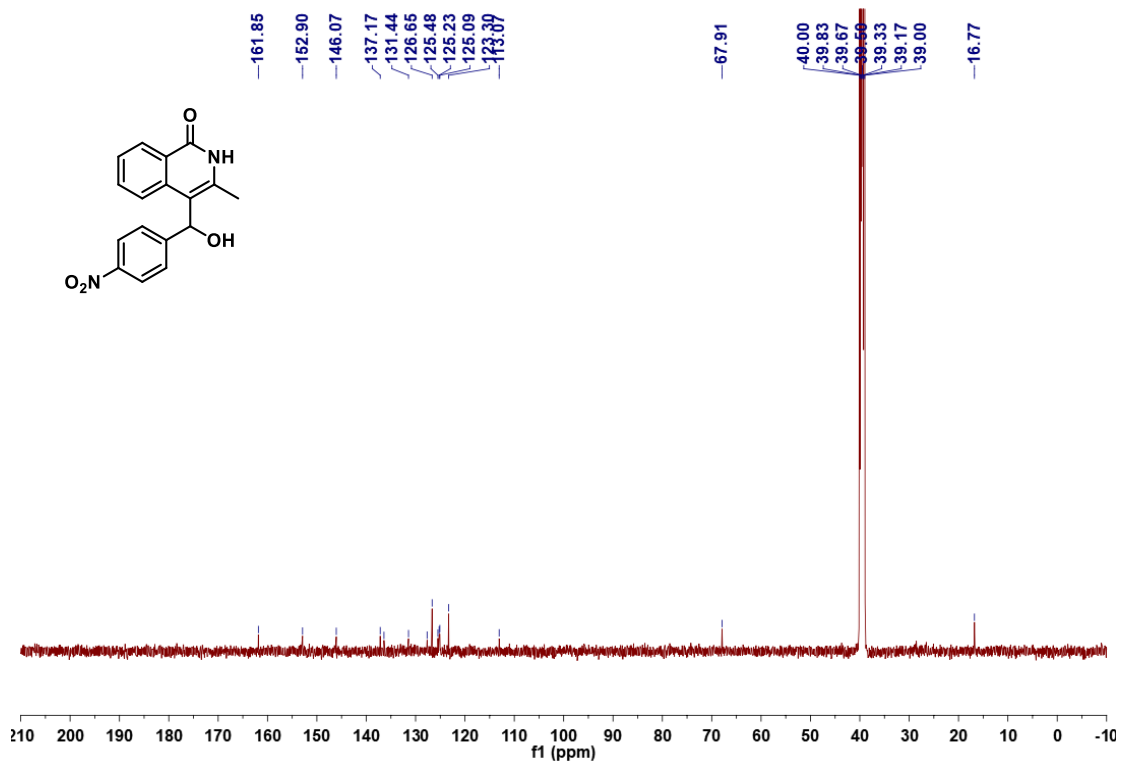

4-(hydroxy(4-(trifluoromethyl)phenyl)methyl)-3-methylisoquinolin-1(2H)-one (3bb)

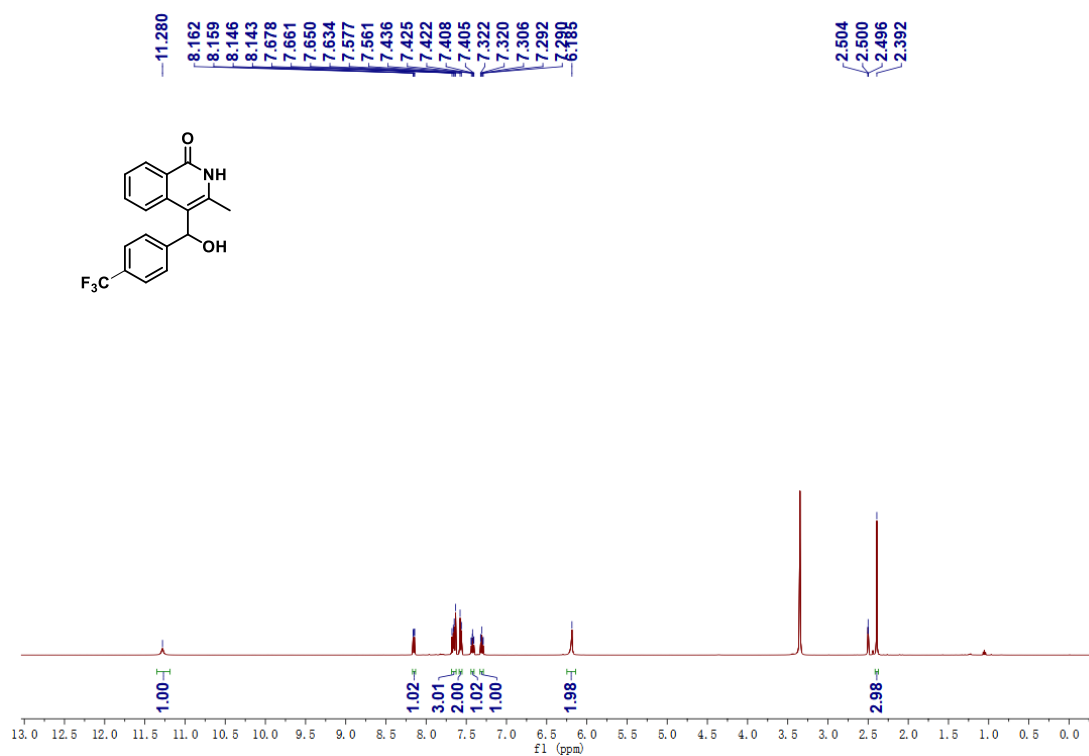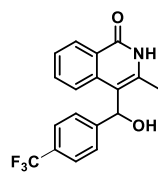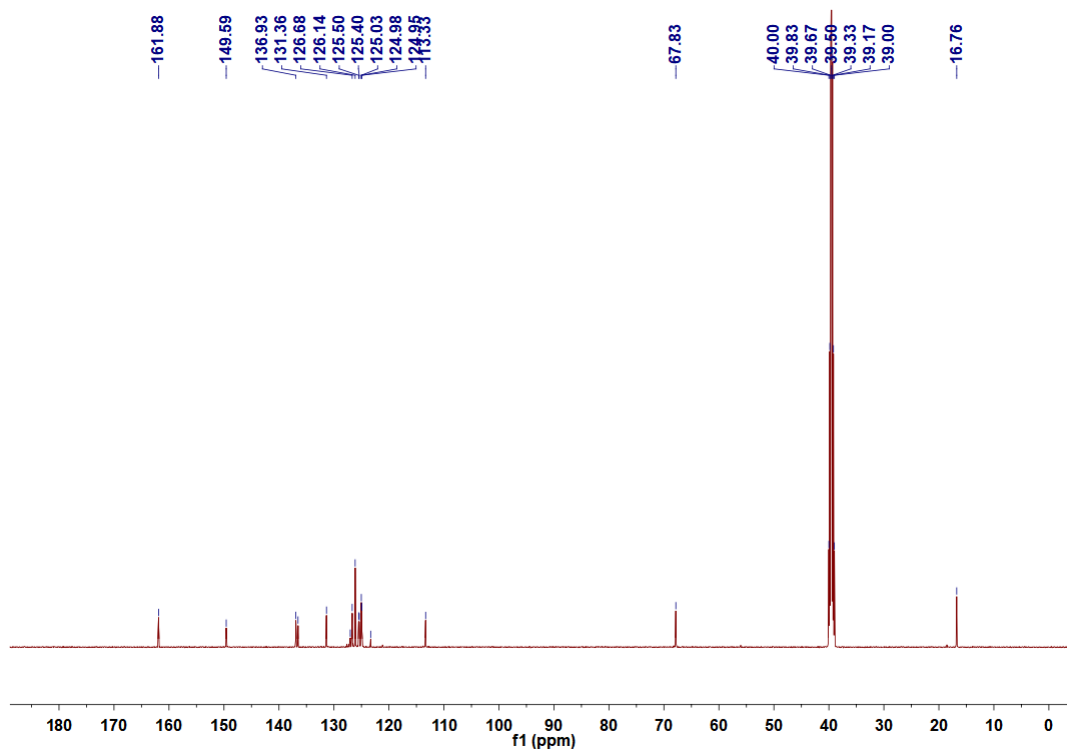

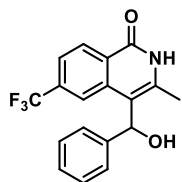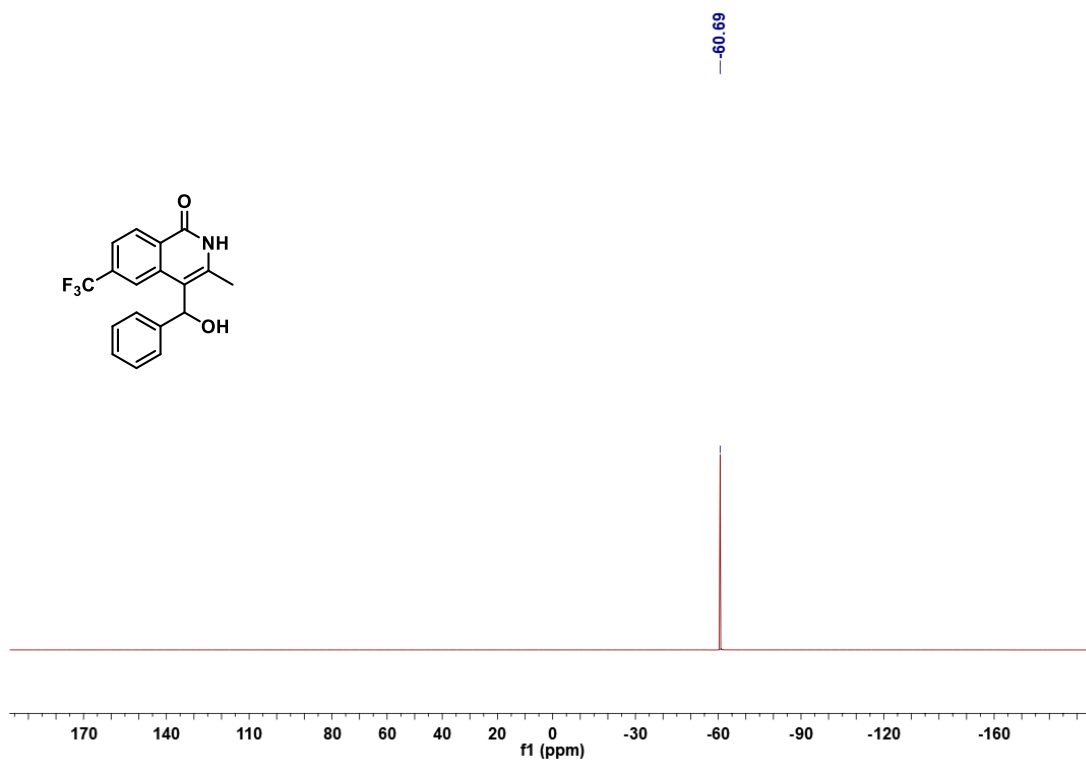

### 4-(hydroxy(naphthalen-2-yl)methyl)-3-methylisoquinolin-1(2H)-one (3bc)

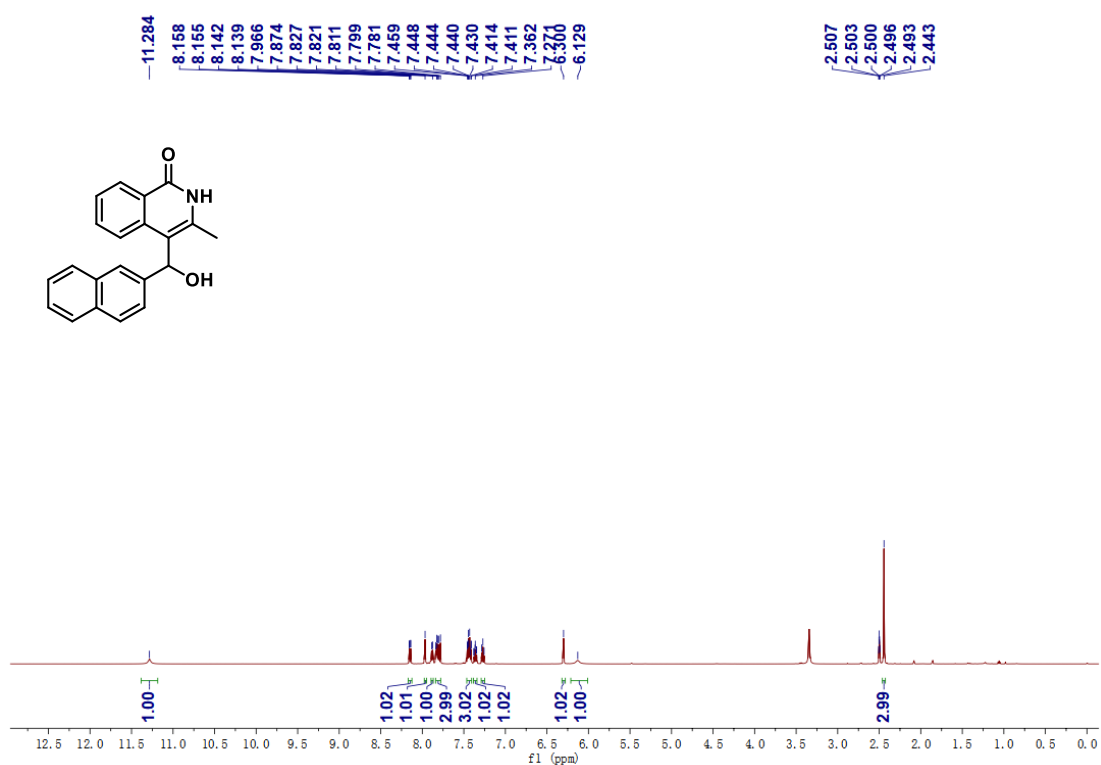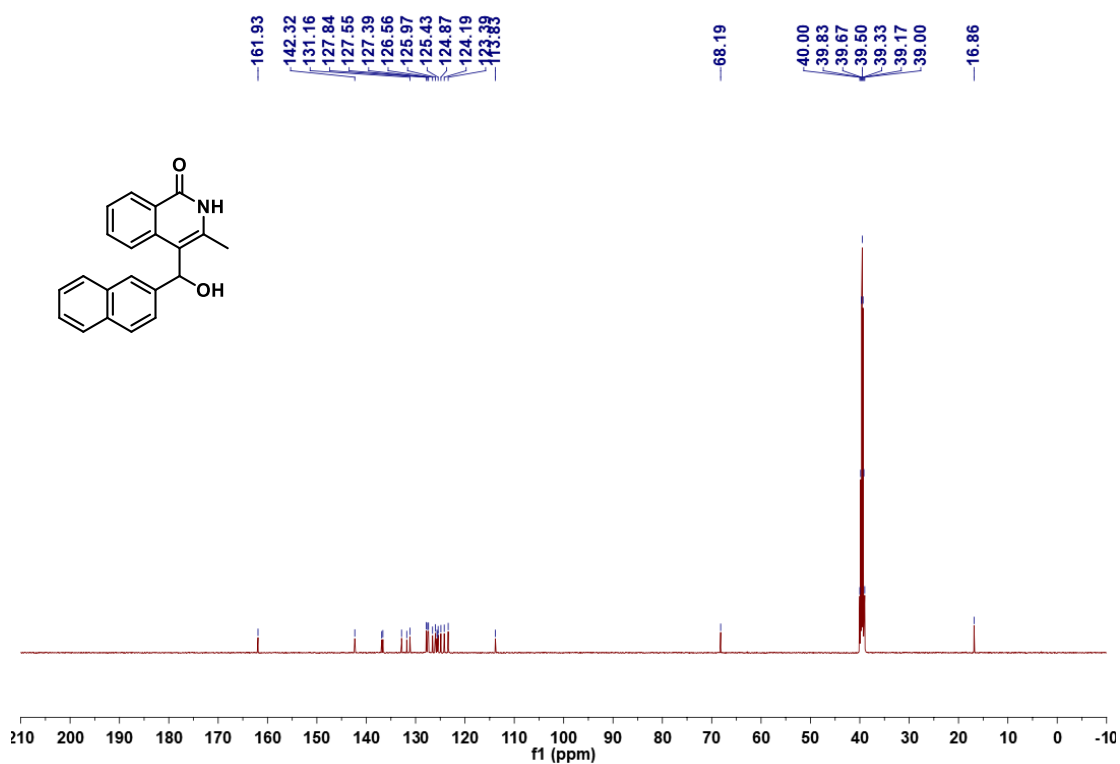

### 4-(hydroxy(thiophen-3-yl)methyl)-3-methylisoquinolin-1(2H)-one (3bd)

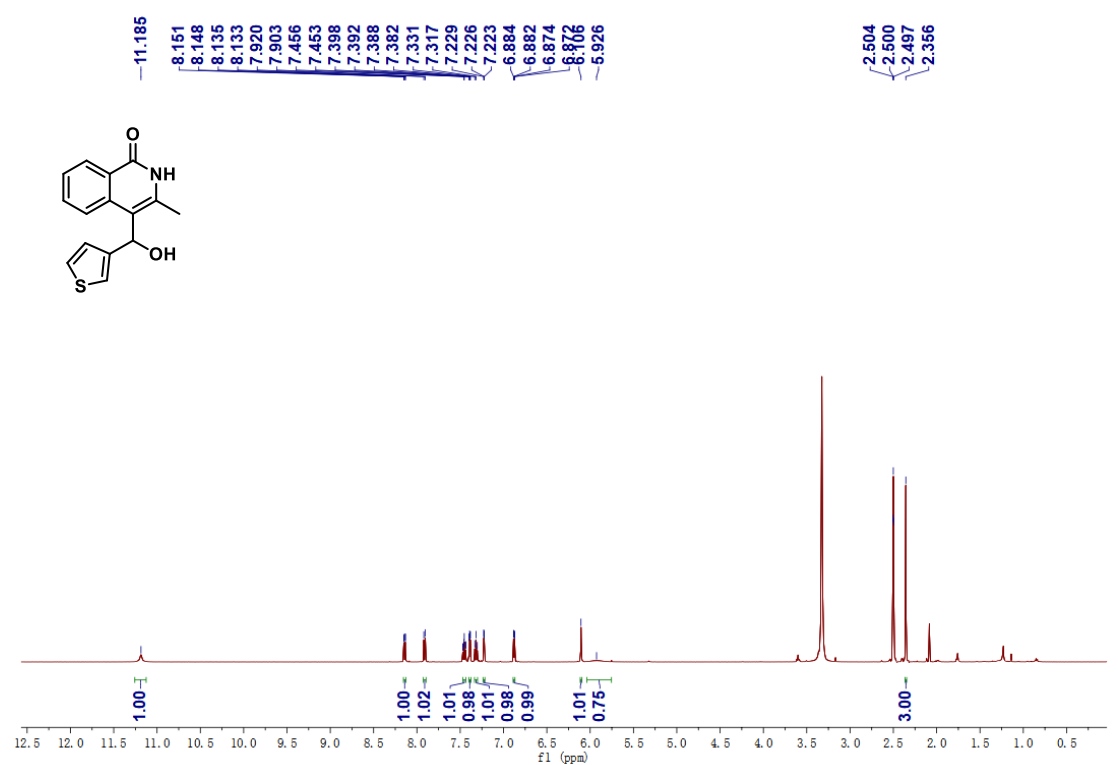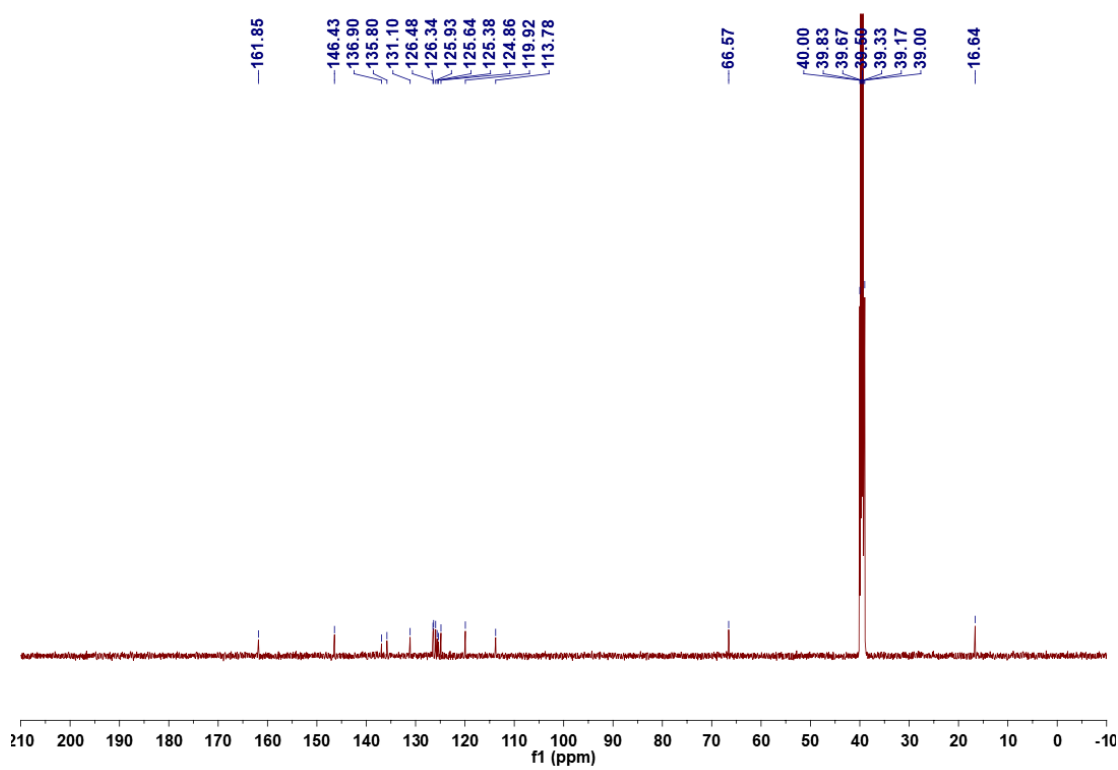

### 4-(hydroxy(pyridin-4-yl)methyl)-3-methylisoquinolin-1(2H)-one (3be)

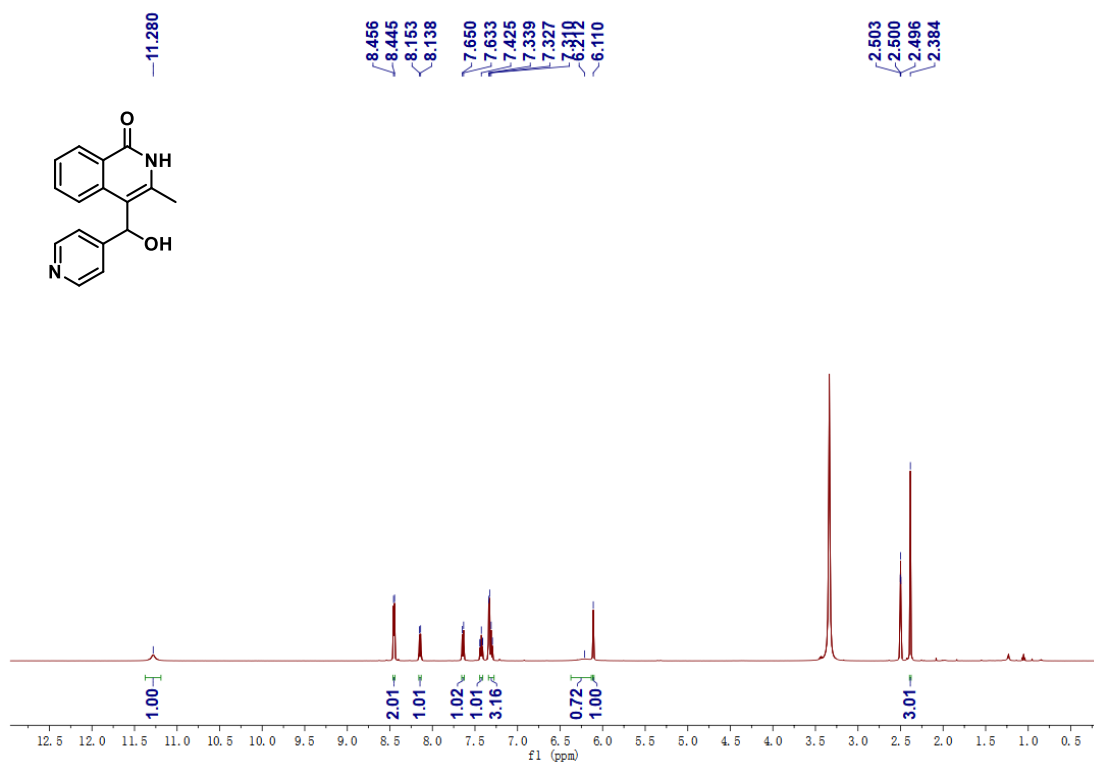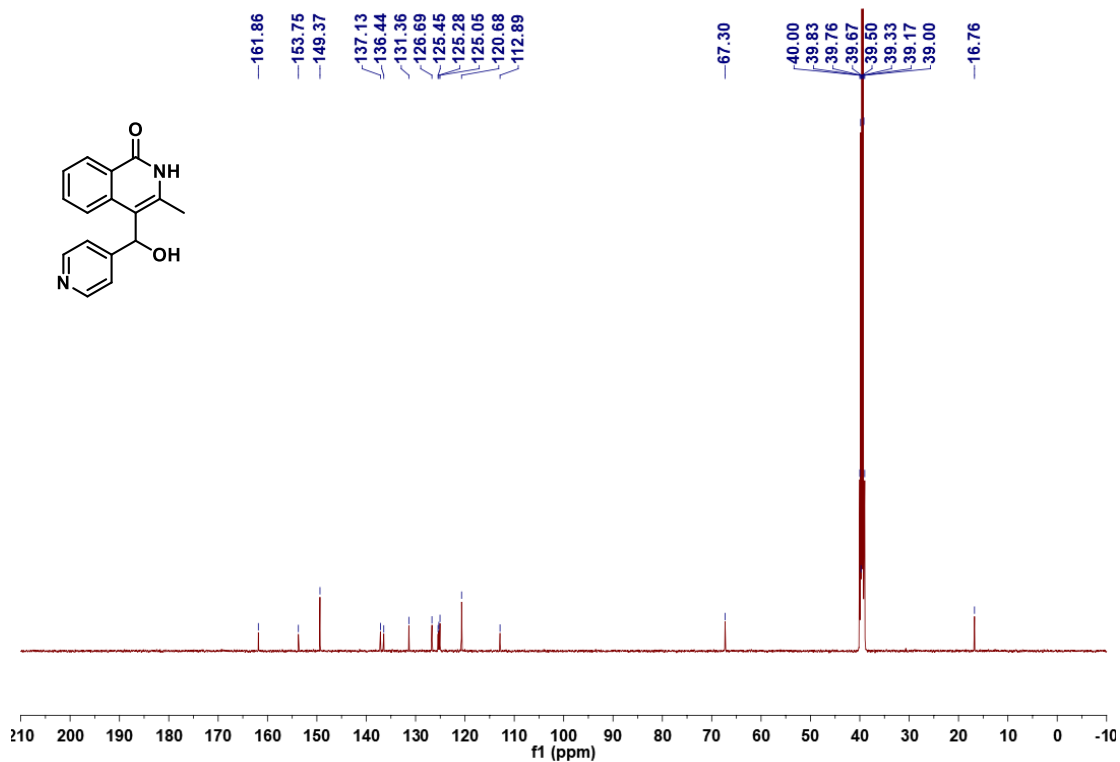

4-(hydroxy(4-(4-methylpiperazin-1-yl)phenyl)methyl)-3-methylisoquinolin-1(2H)-one (3bf)

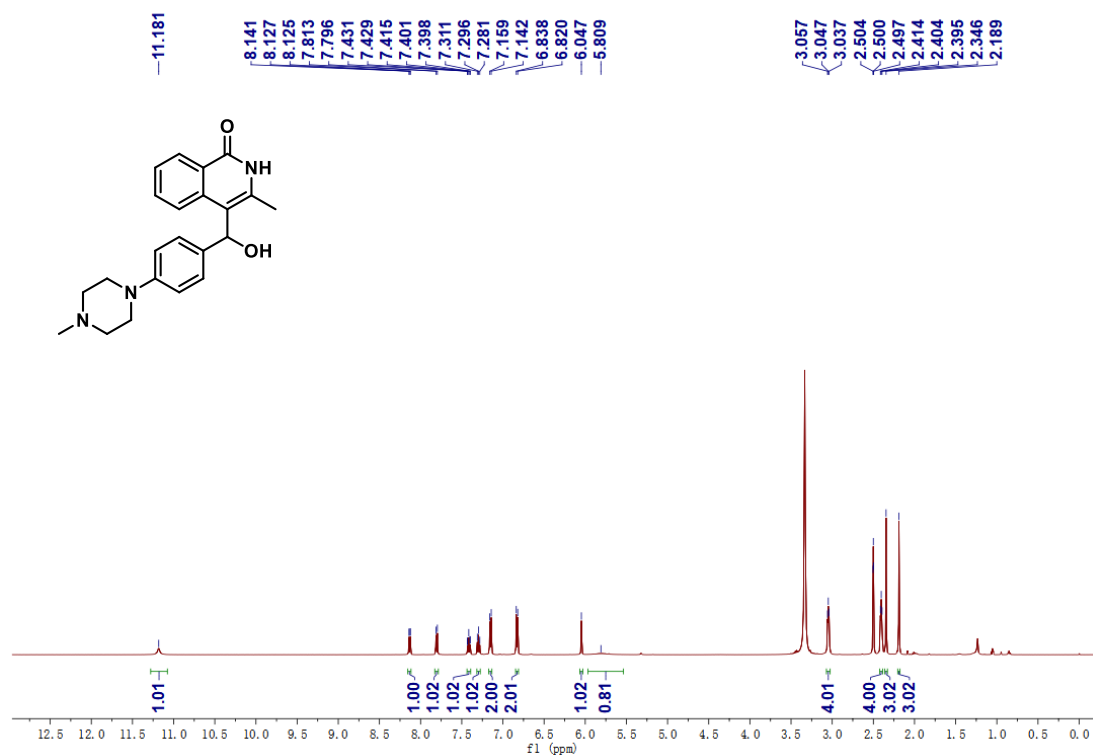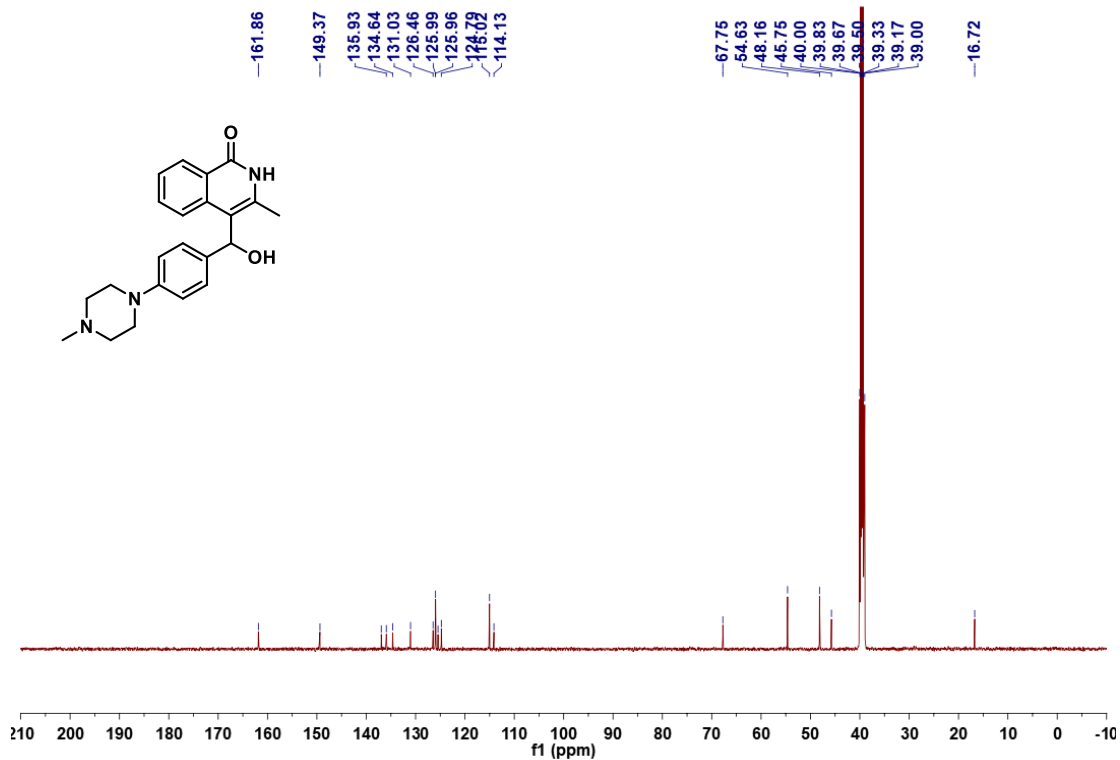

4-(hydroxy(4-(4-methylpiperazin-1-yl)phenyl)methyl)-6-iodo-3-methylisoquinolin-1(2H)-one  
(3bg)

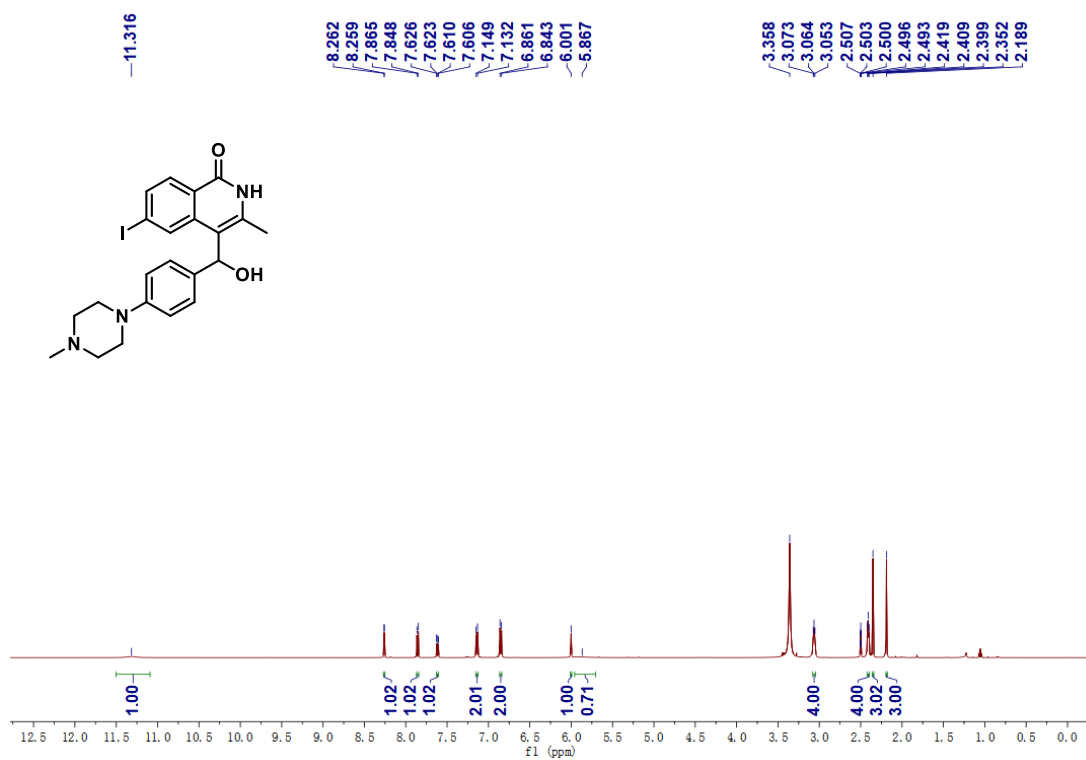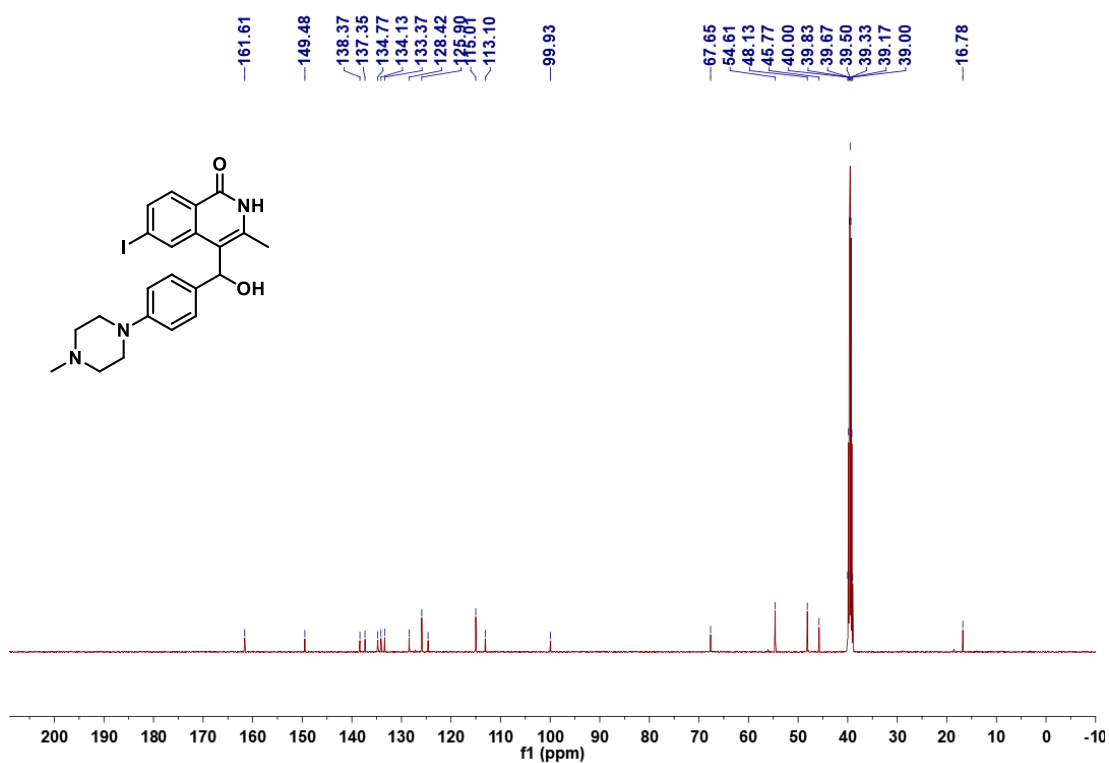



### 3-(hydroxy(4-(4-methylpiperazin-1-yl)phenyl)methyl)isoquinolin-1(2H)-one (3bh)

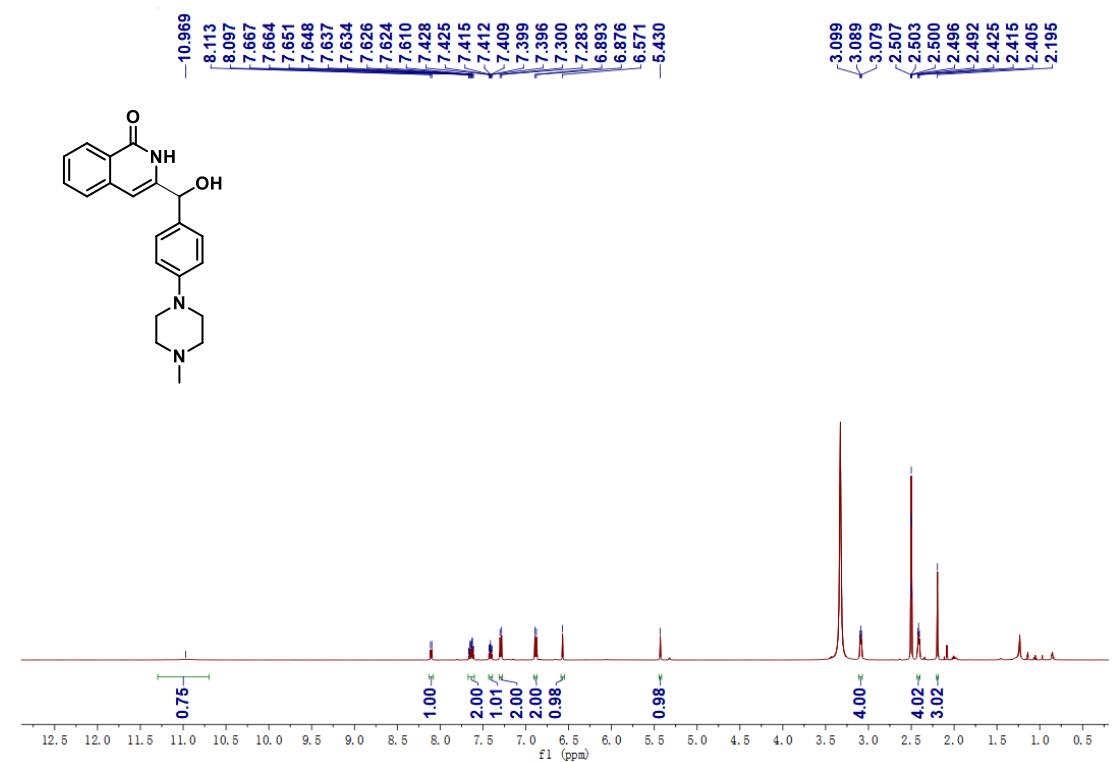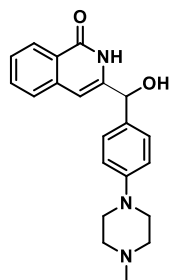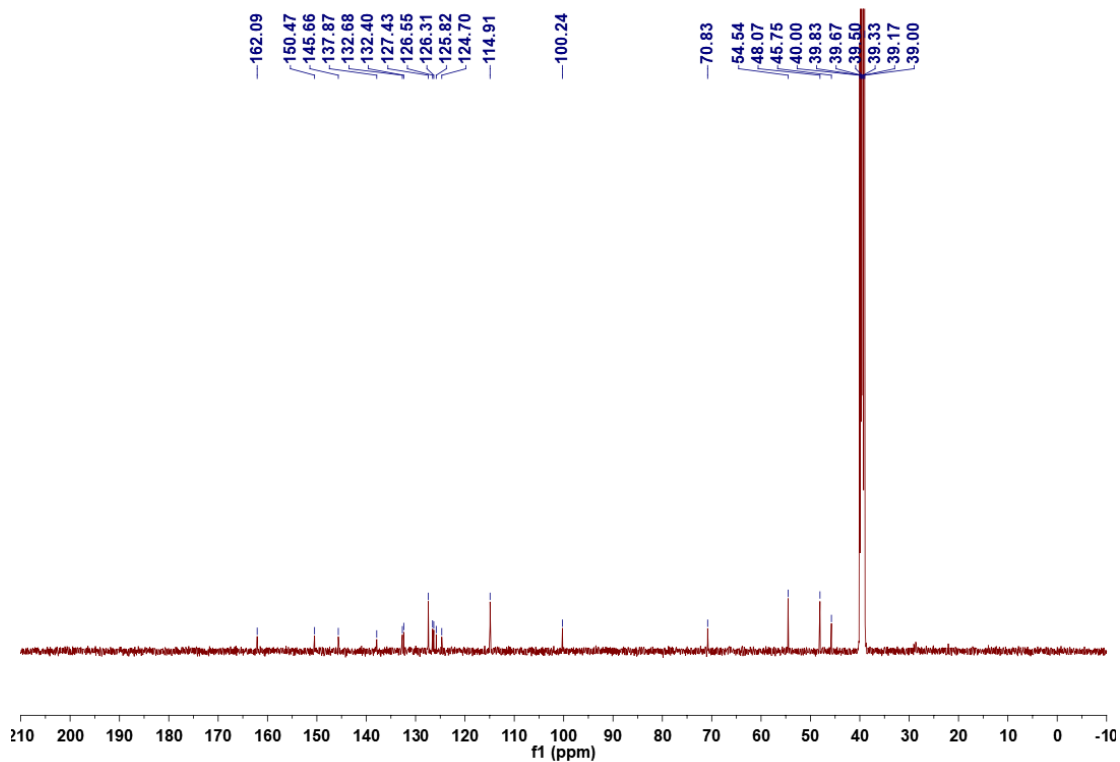

### 3-(hydroxy(phenyl)methyl)isoquinolin-1(2H)-one (3bi)

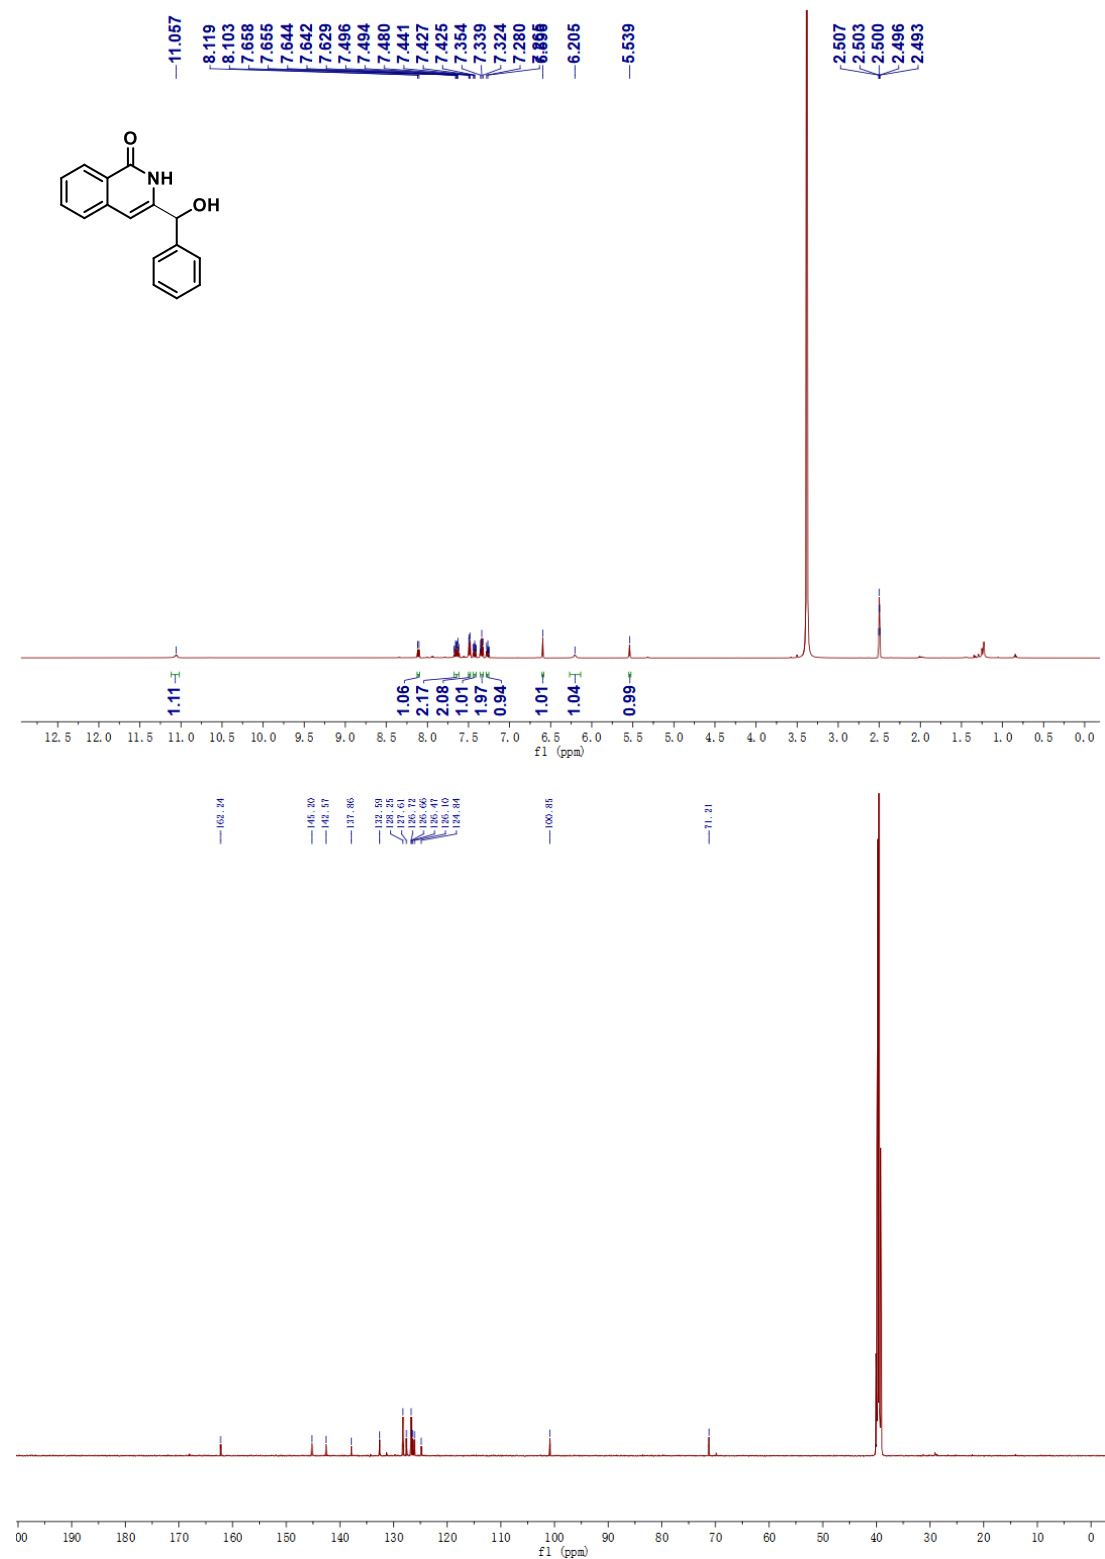

4-(hydroxy(phenyl)methyl)-3-phenylisoquinolin-1(2H)-one (3bj)

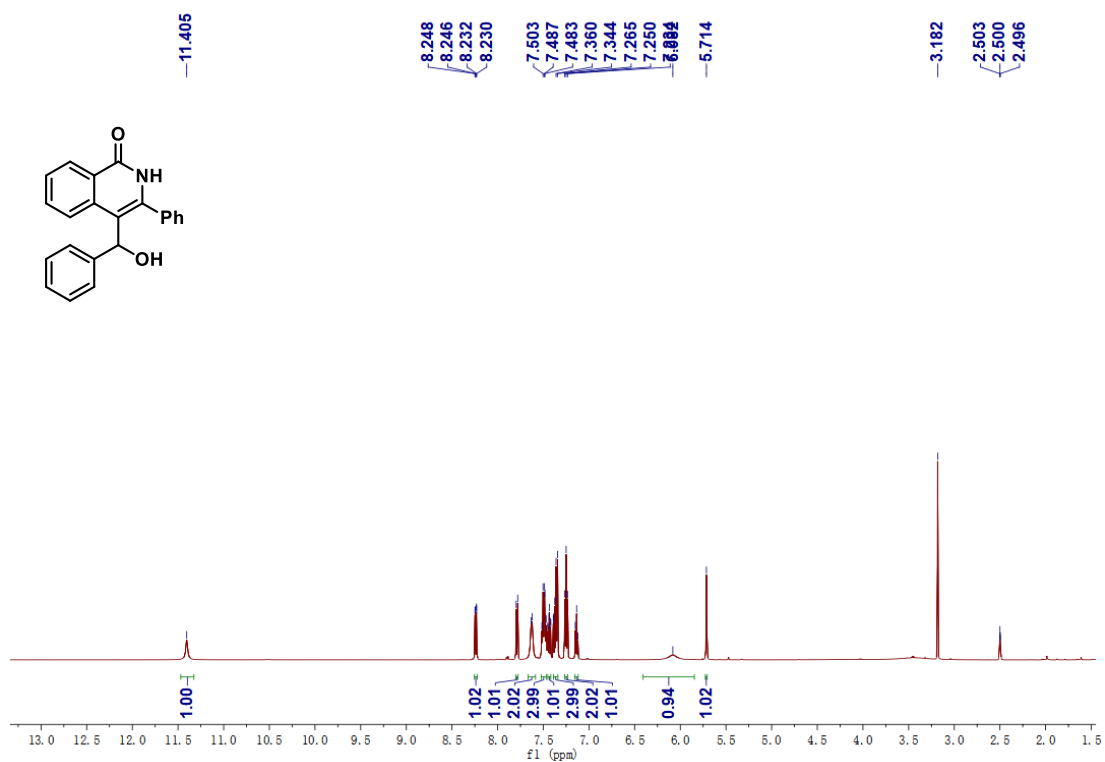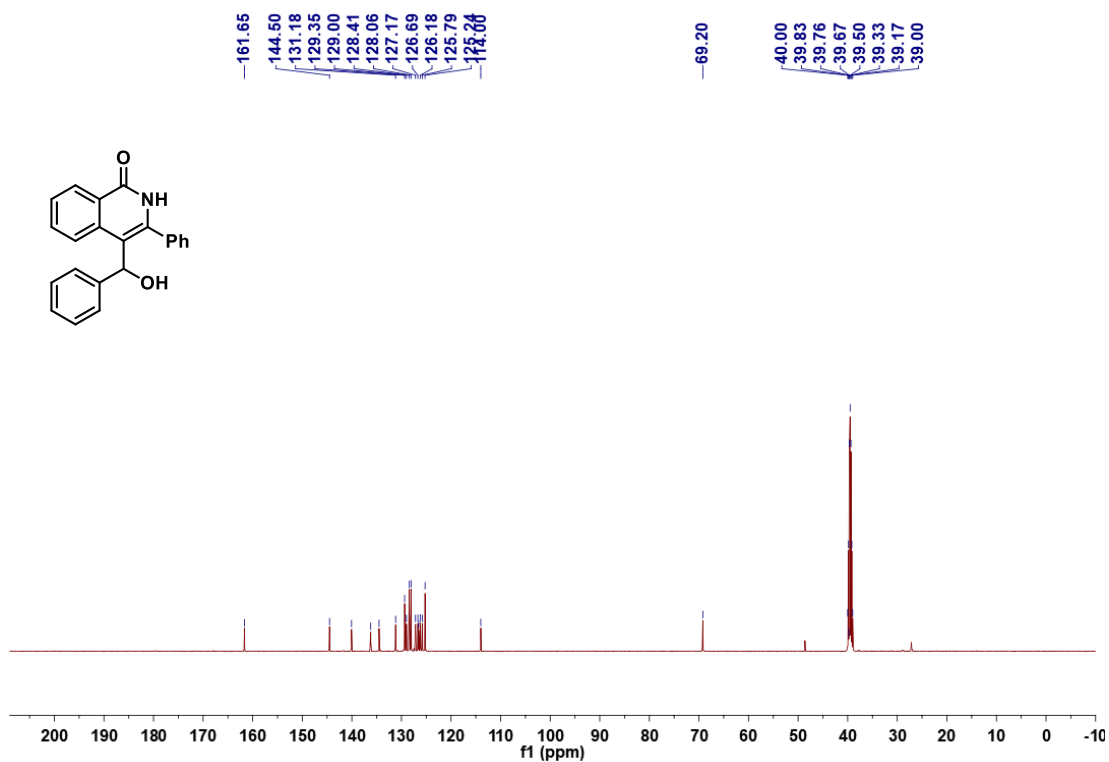

3-butyl-4-(hydroxy(phenyl)methyl)isoquinolin-1(2H)-one (3bk)

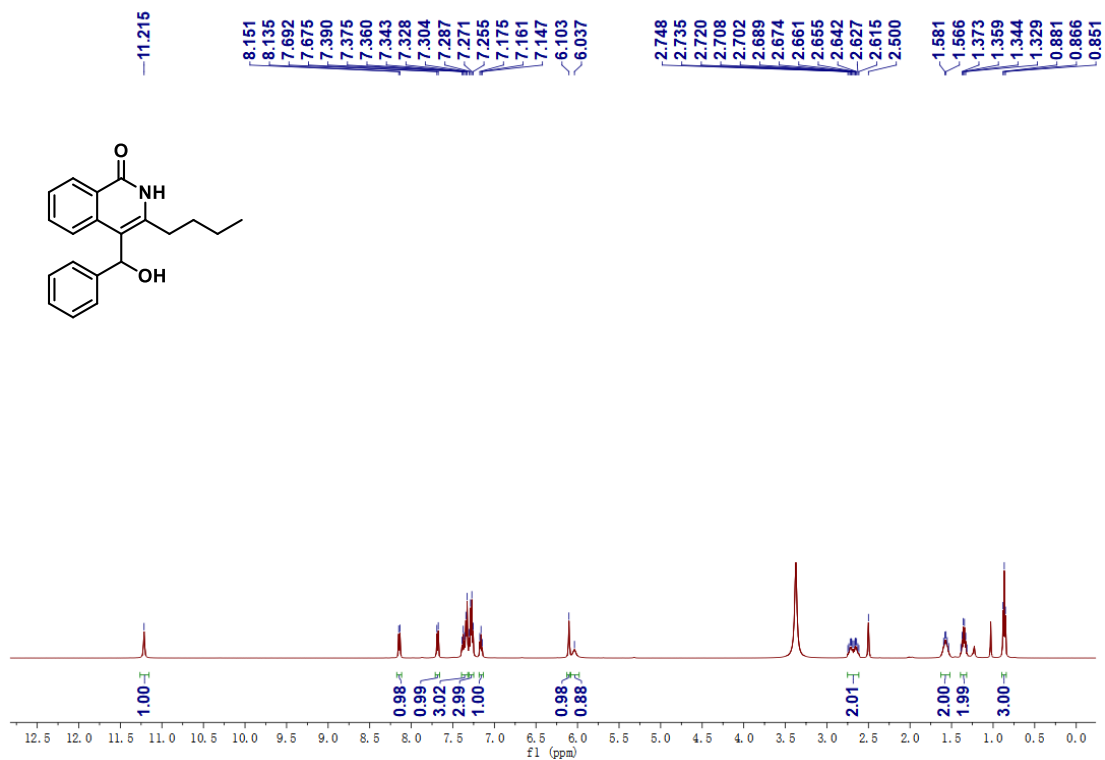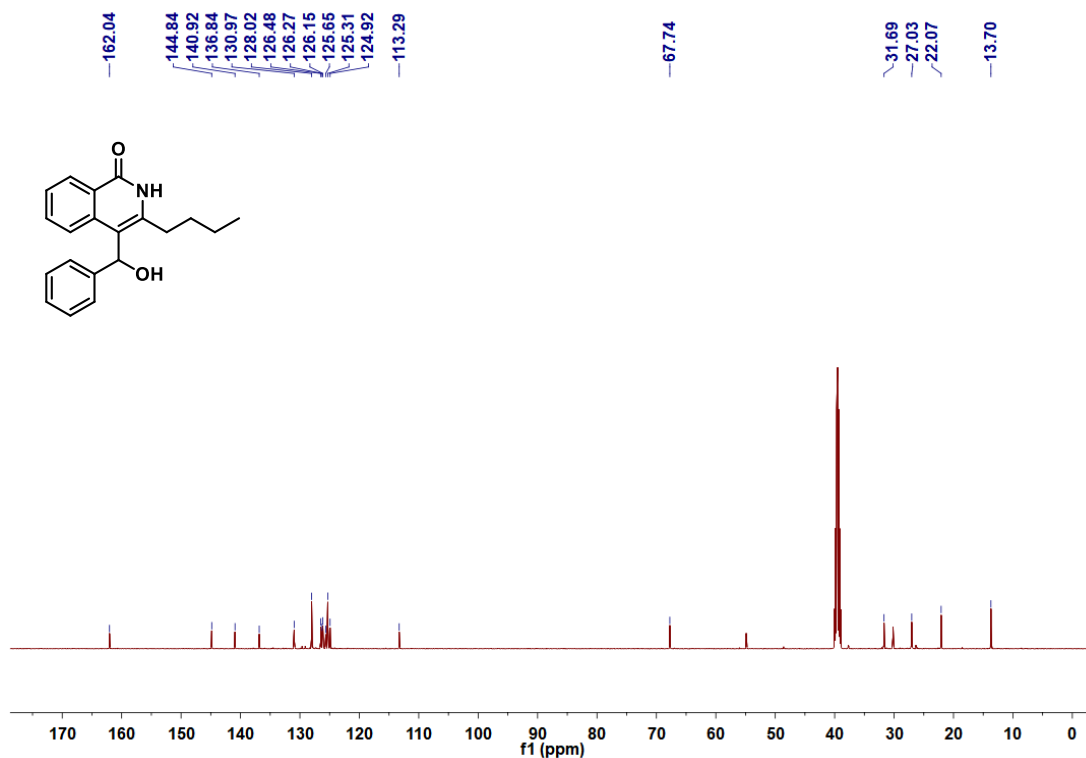

### 4-(1-hydroxy-1-phenylethyl)-3-methylisoquinolin-1(2H)-one (3bl)

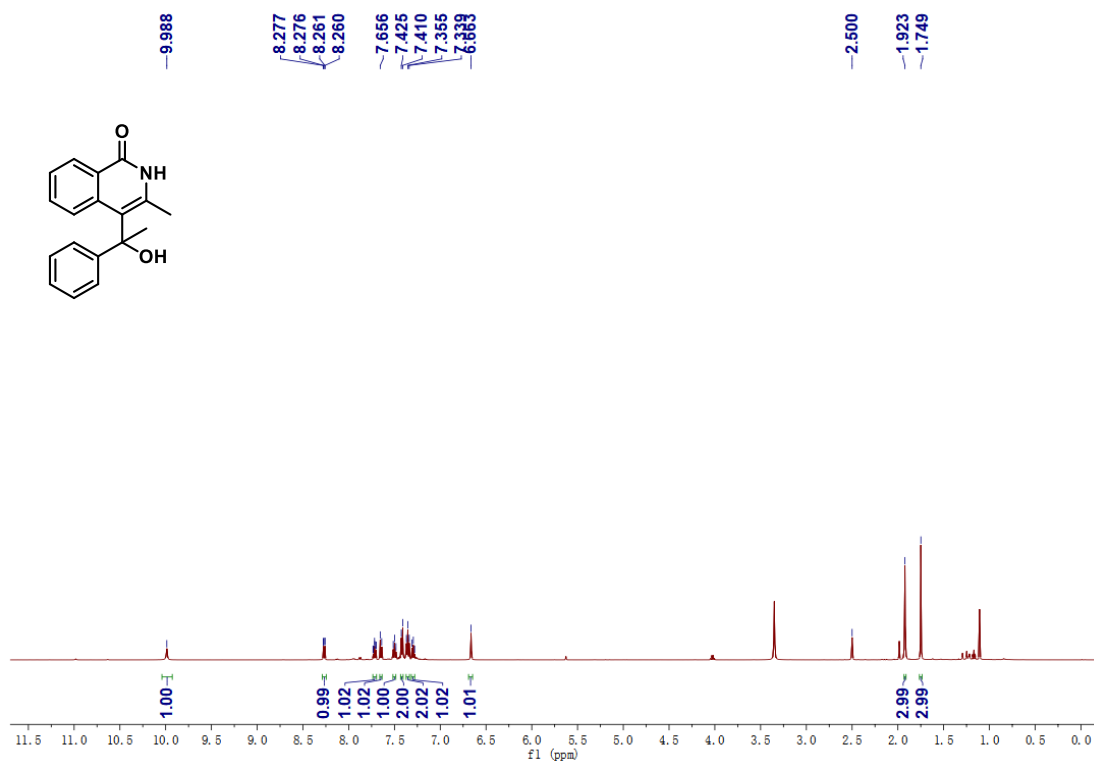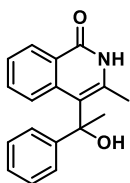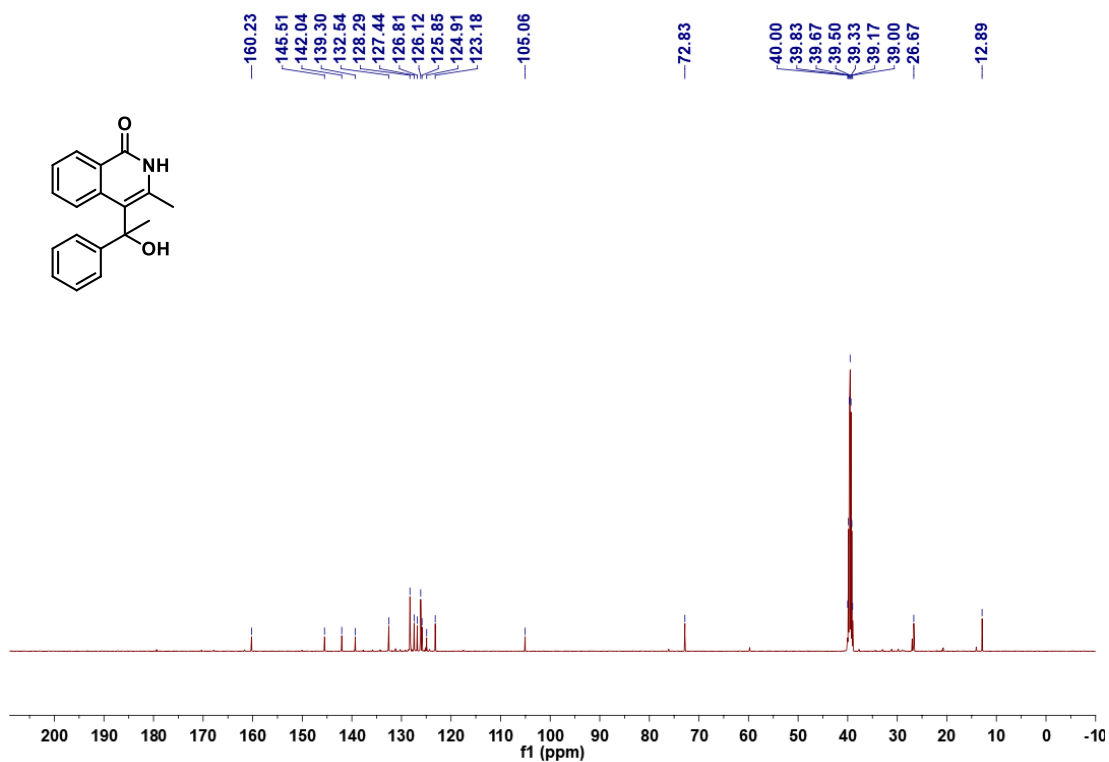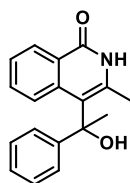

4-(cyclohexyl(hydroxy)methyl)-3-methylisoquinolin-1(2H)-one (3bm)

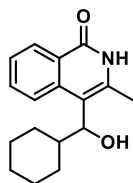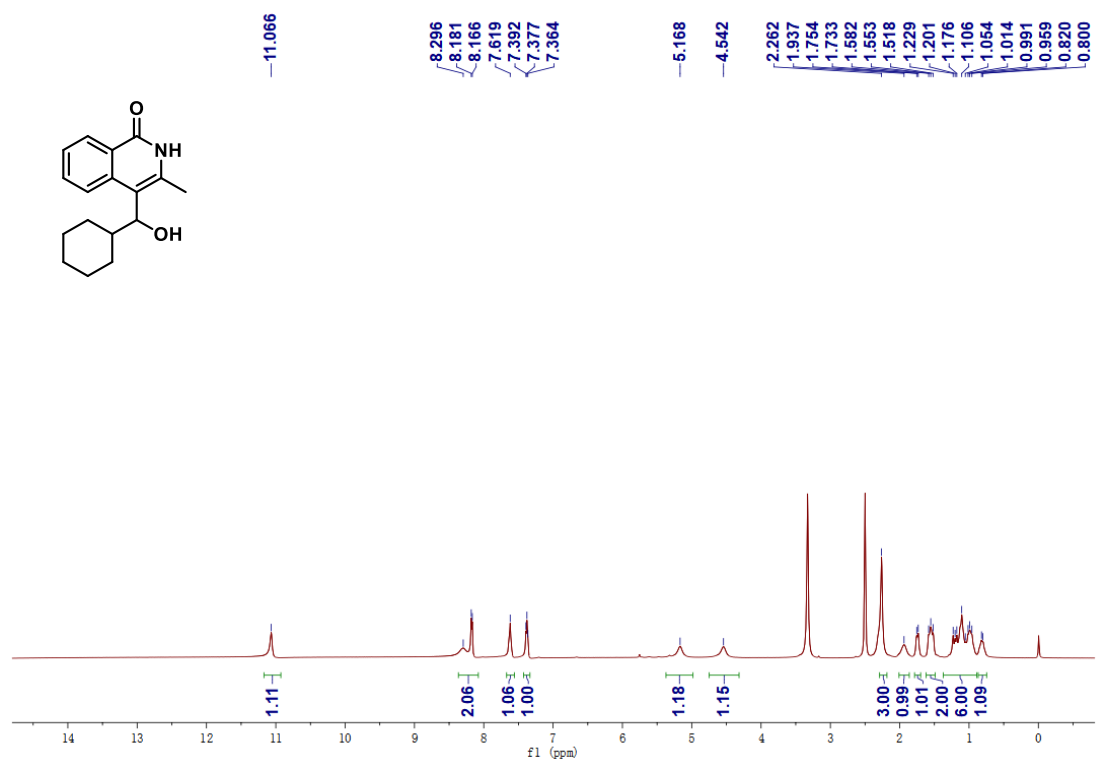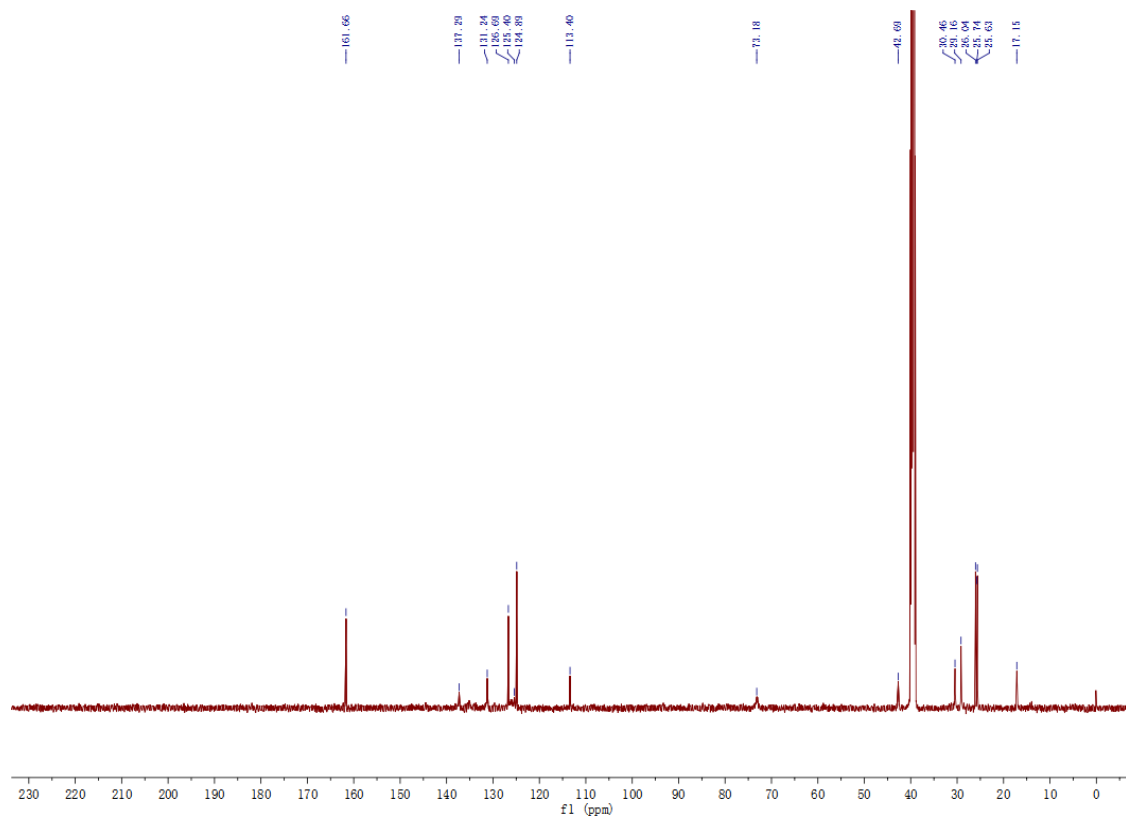

4-(1-hydroxycyclobutyl)-3-methylisoquinolin-1(2H)-one (3bn)

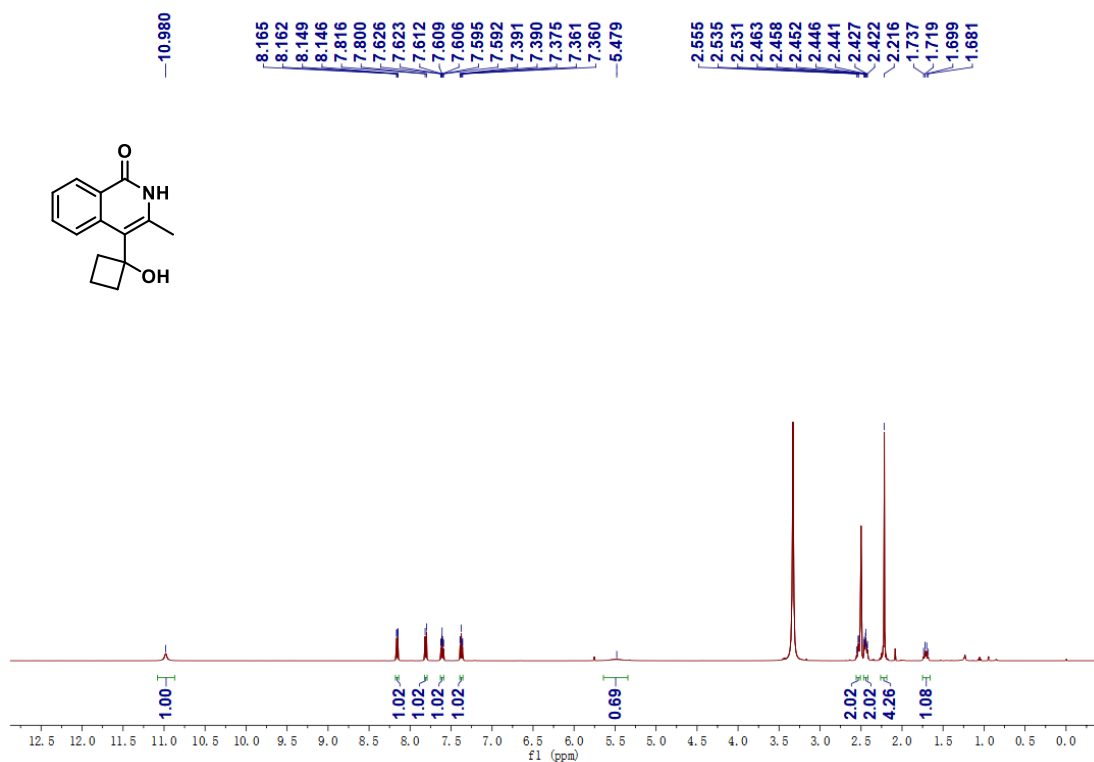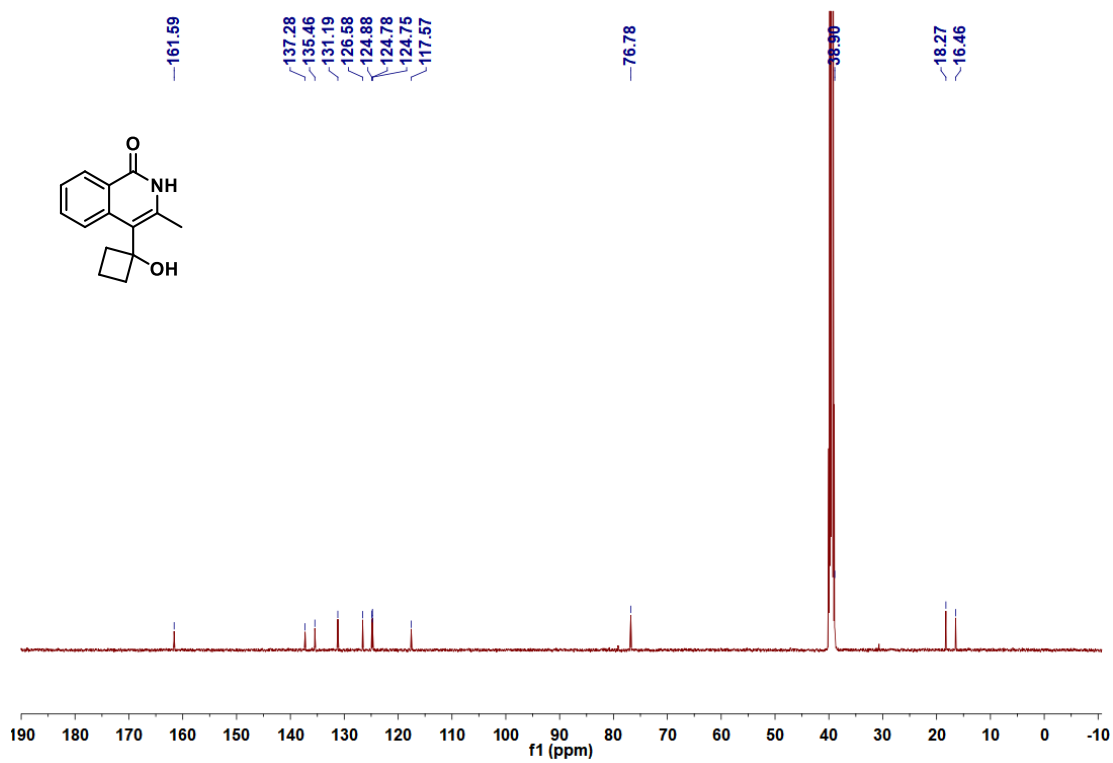

### 3-(methoxy(phenyl)methyl)-4-methylisoquinolin-1(2H)-one (4a)

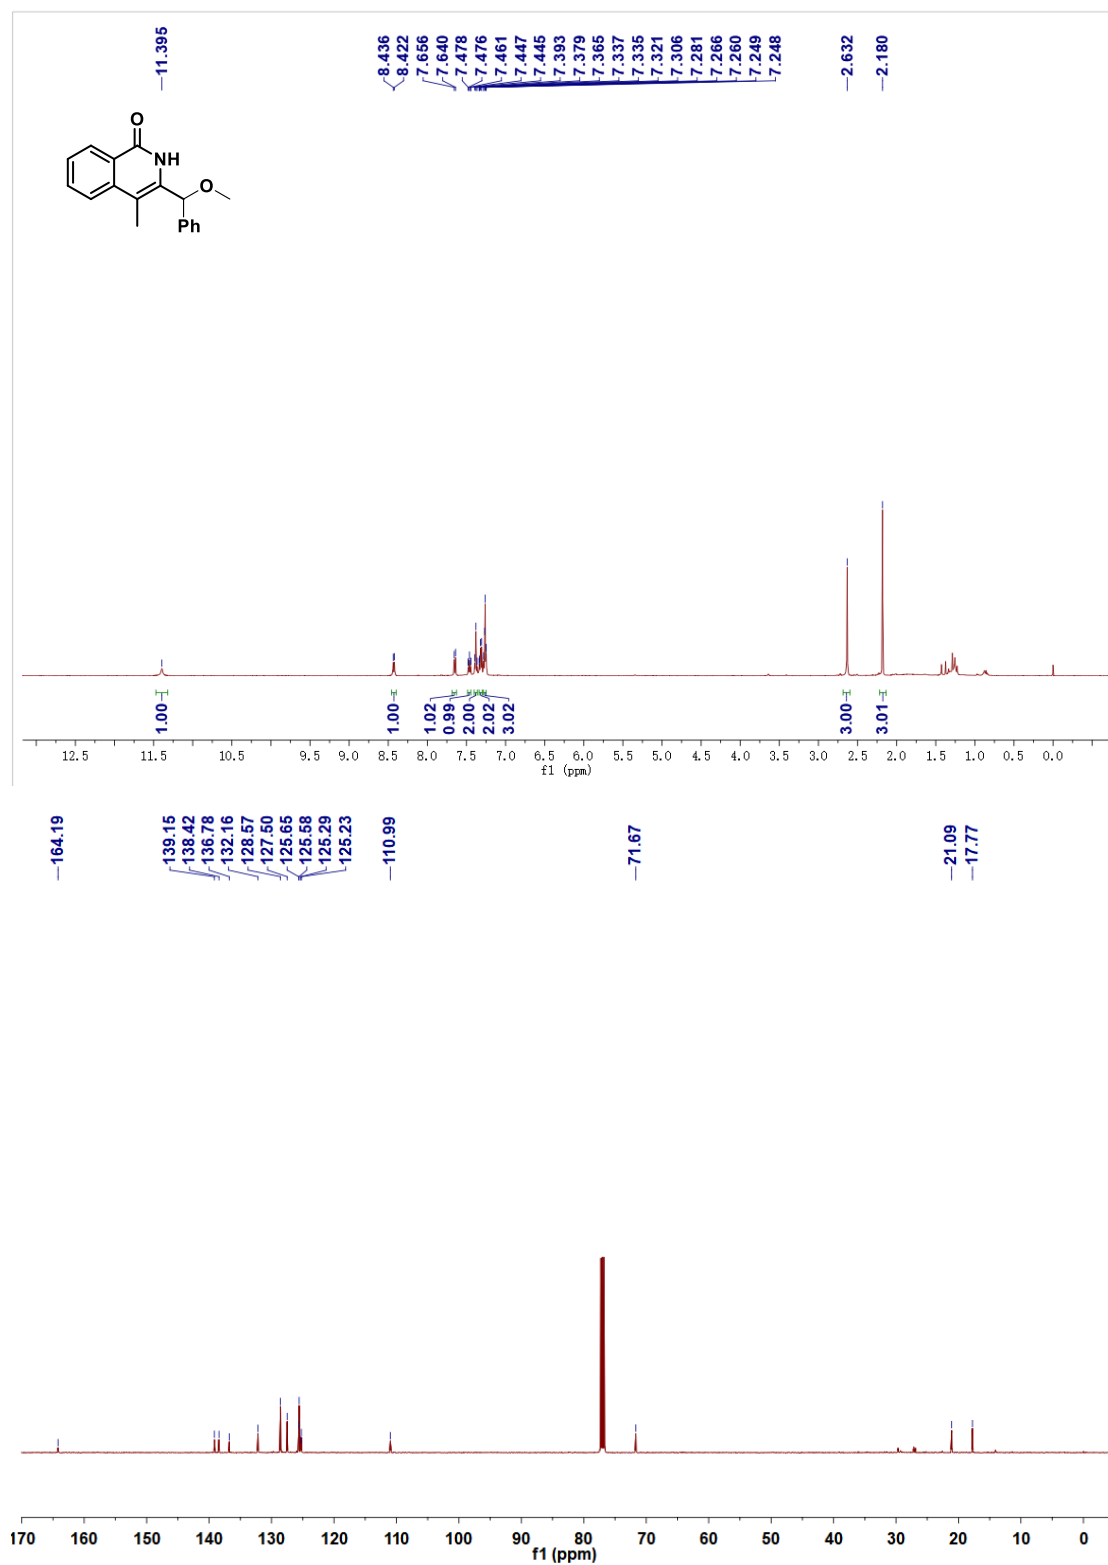



**A mixture of 3-benzoyl-4-methylisoquinolin-1(2H)-one (4b) and 4-benzoyl-3-methylisoquinolin-1(2H)-one (4b')**

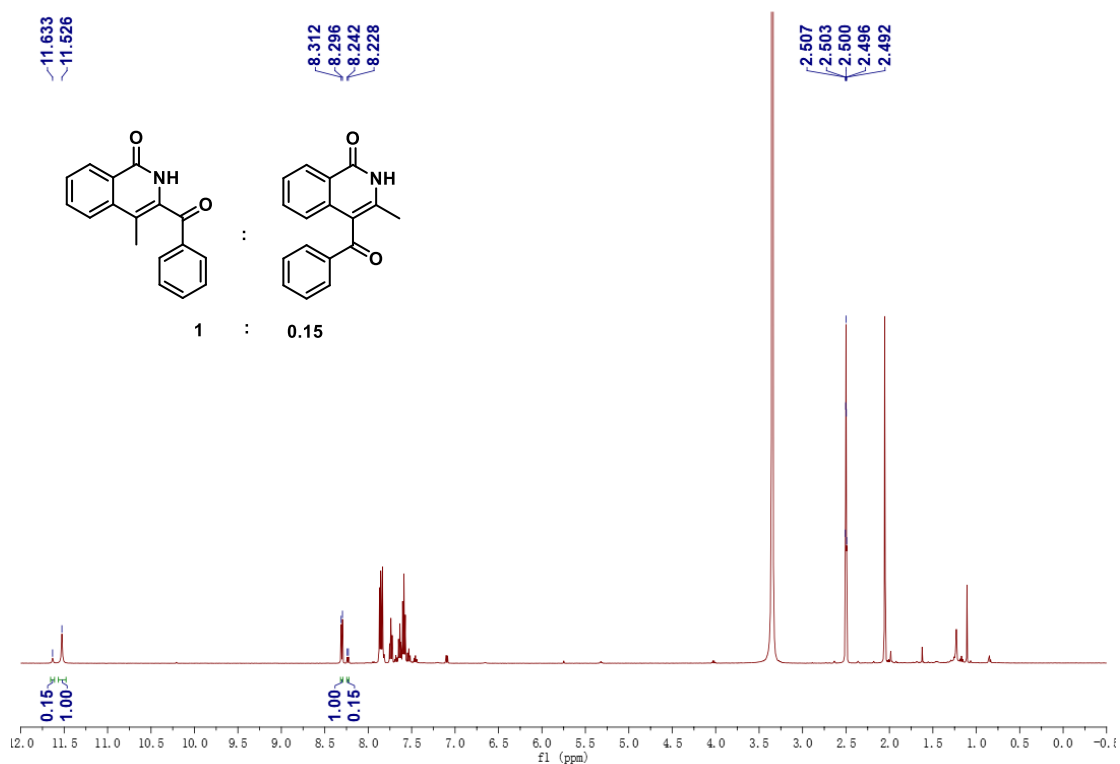

**3-benzoyl-4-methylisoquinolin-1(2H)-one (4b)**

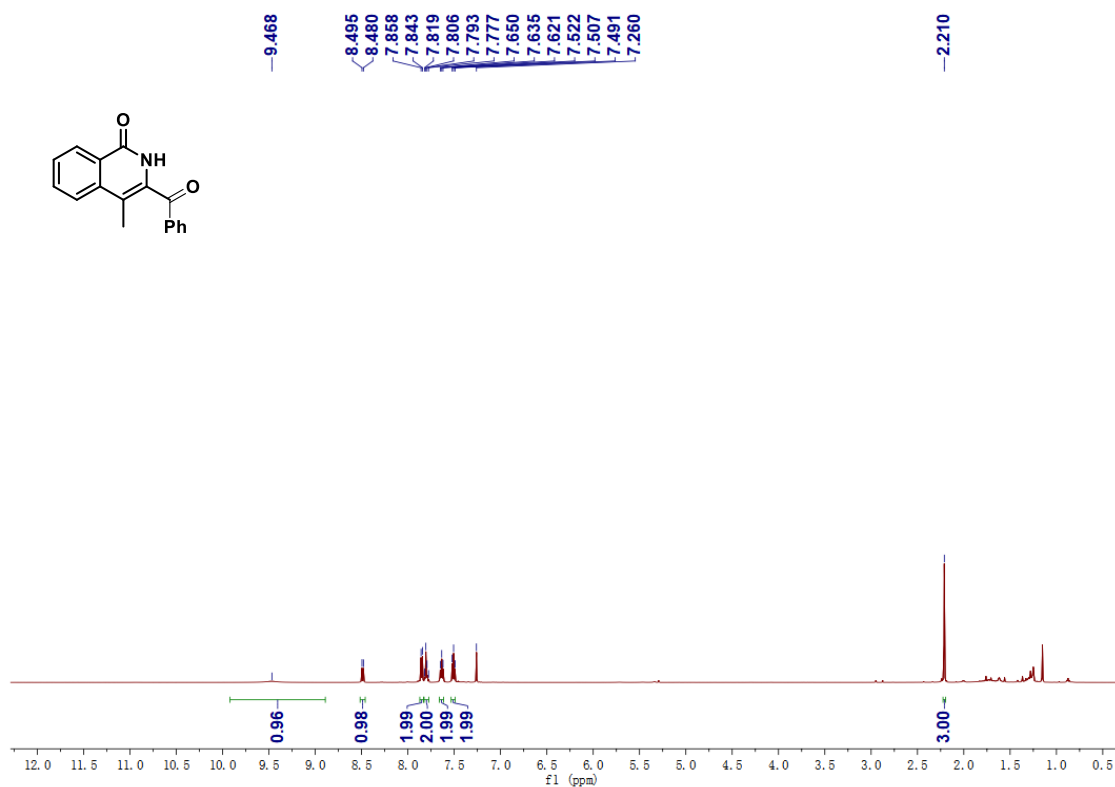

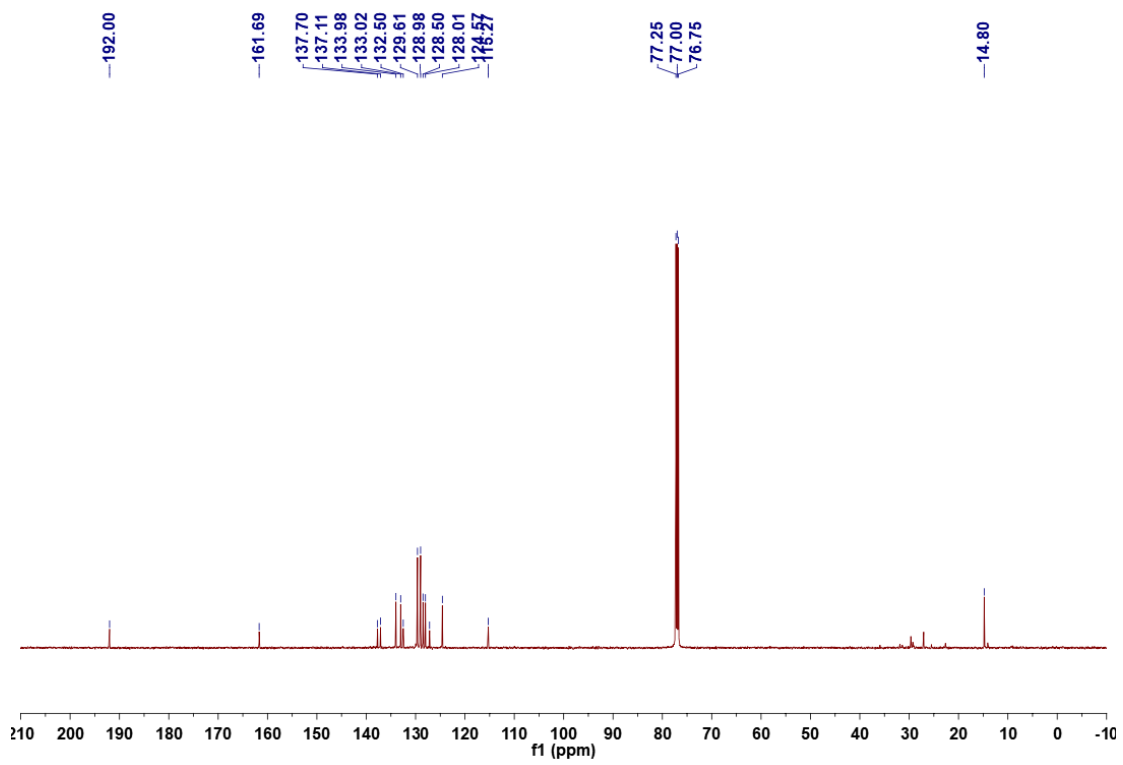

### 4-benzoyl-3-methylisoquinolin-1(2H)-one (4b')

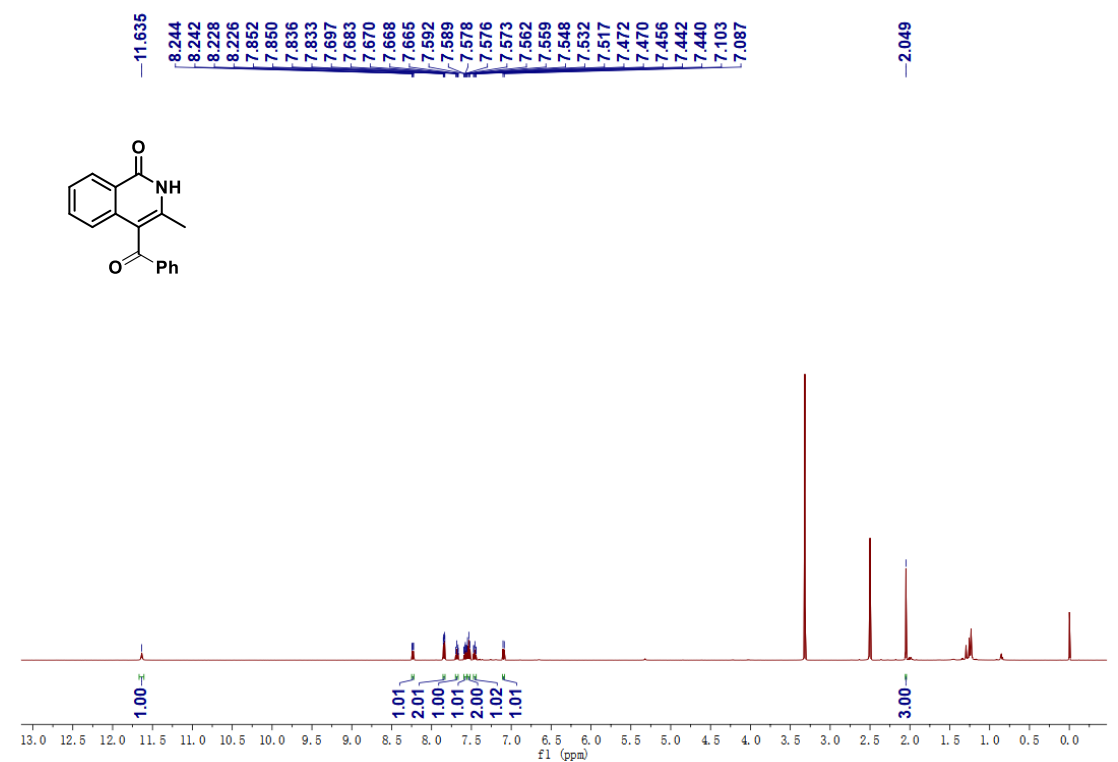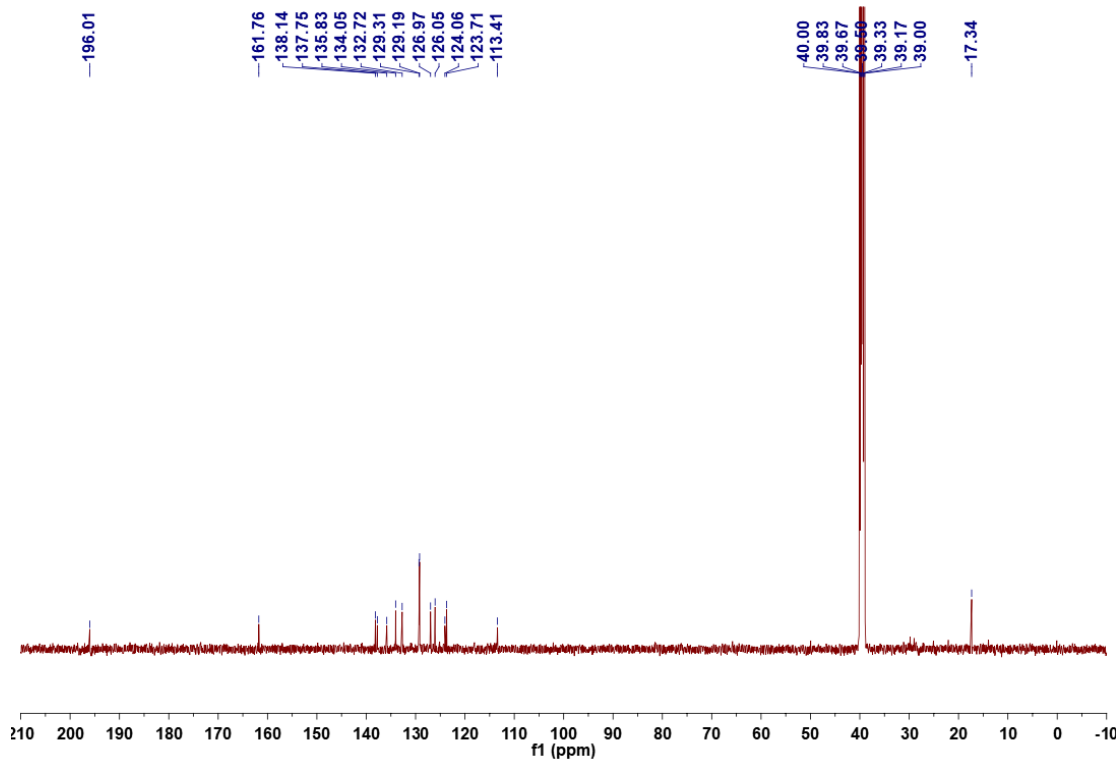

### 3-benzyl-4-methylisoquinolin-1(2H)-one (4c)

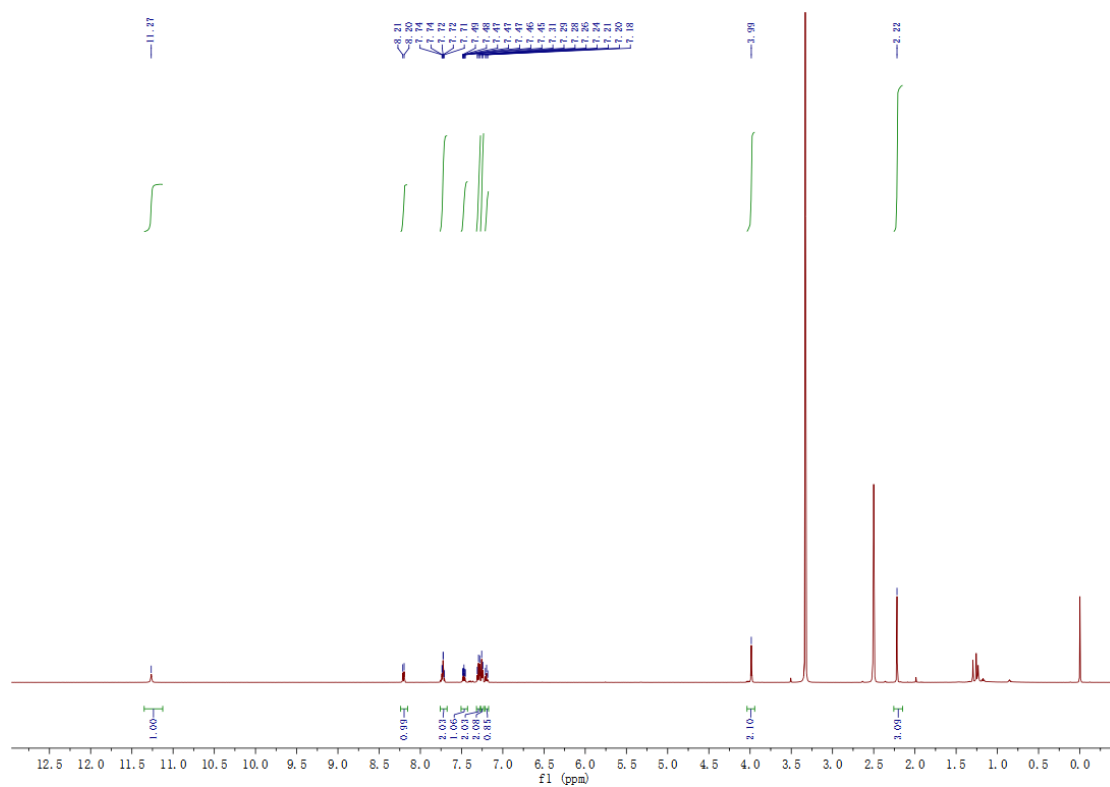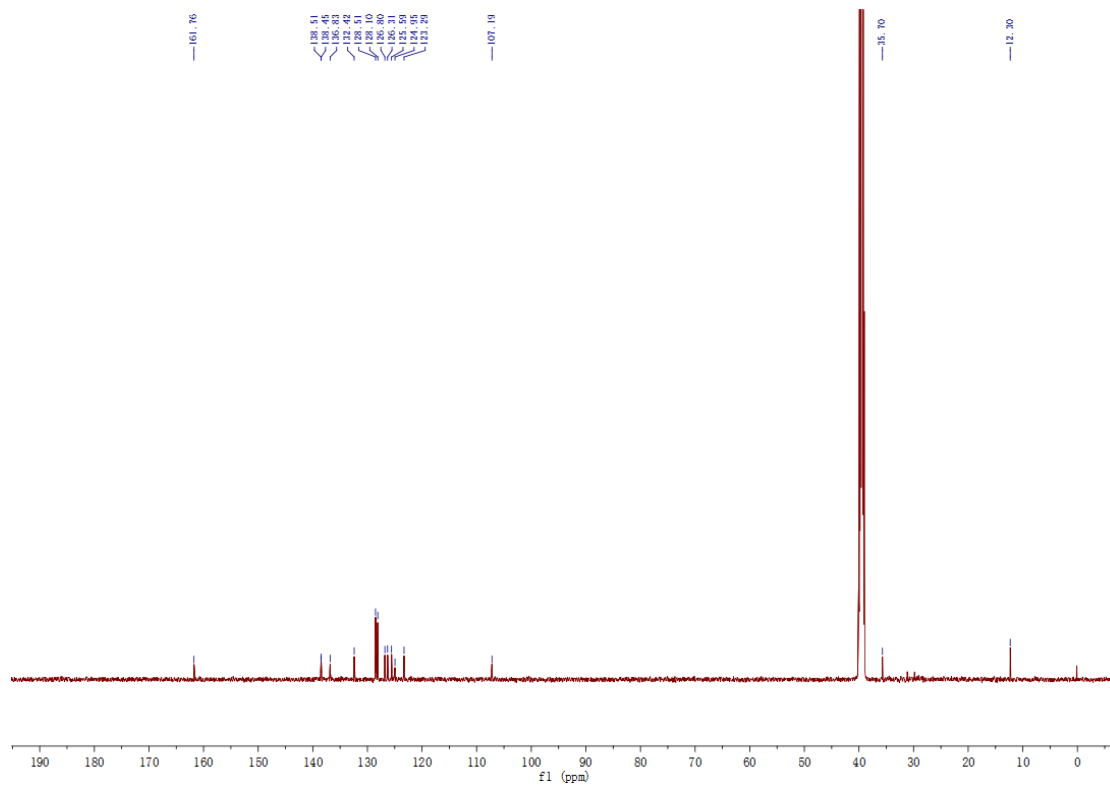

### 4-benzyl-3-methylisoquinolin-1(2H)-one (4c')

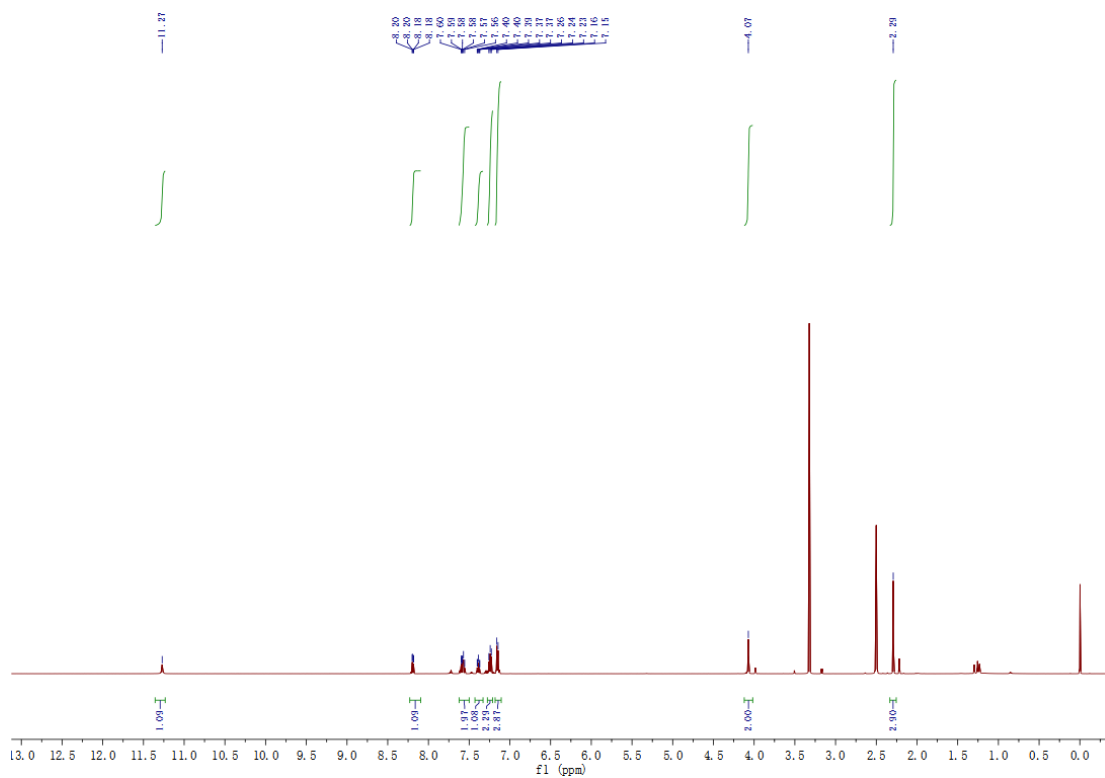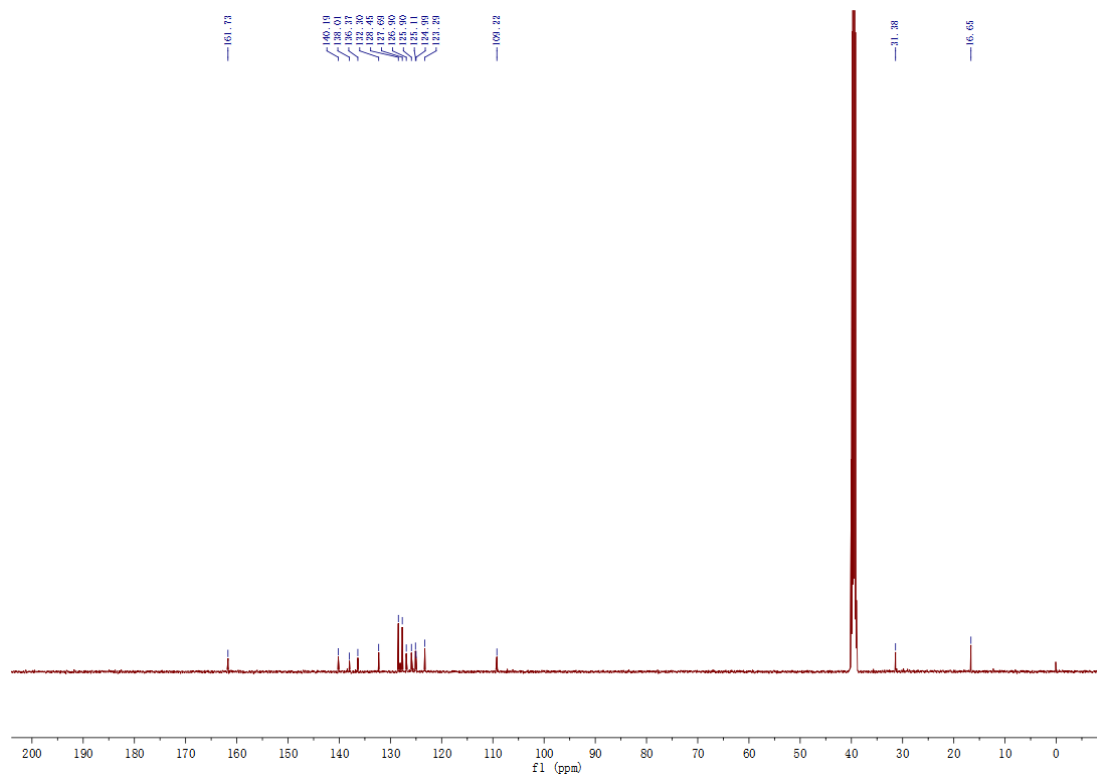

**(1,3-dimethylisoquinolin-4-yl)(phenyl)methanol (4d)**

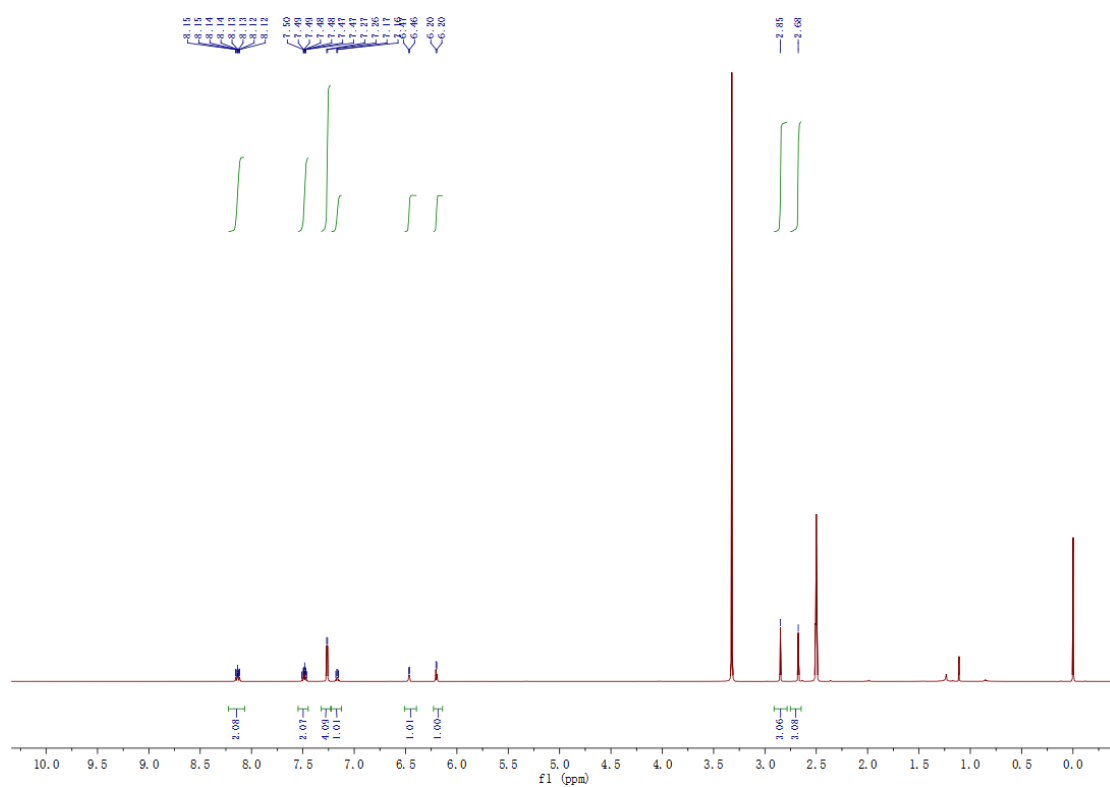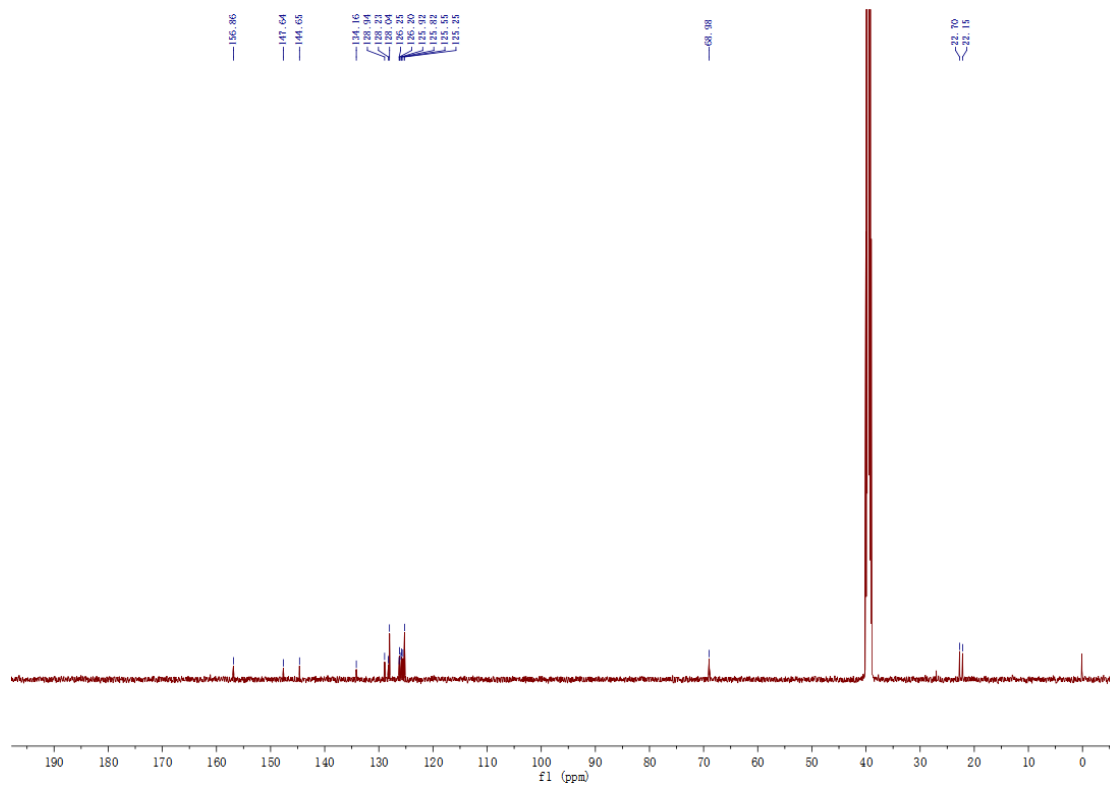

4-(hydroxy(phenyl)methyl)-3-methylisoquinolin-1(2H)-one-5,6,7,8-d<sub>4</sub> (3aa-D<sub>n</sub>)

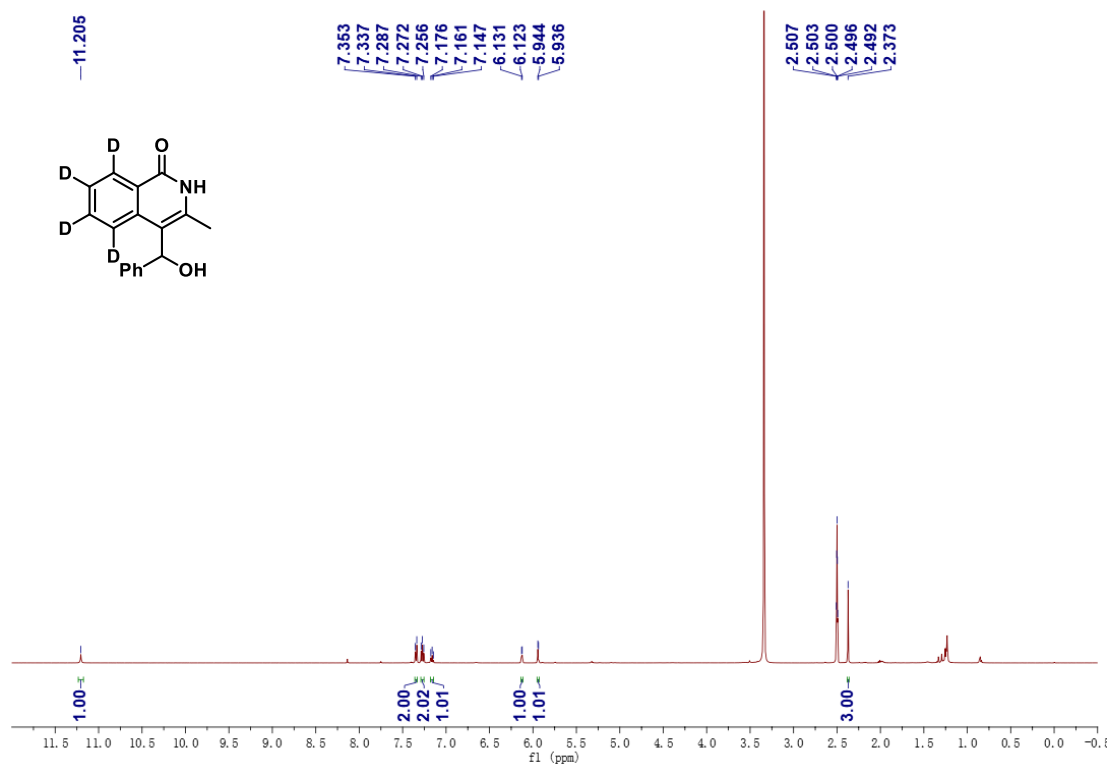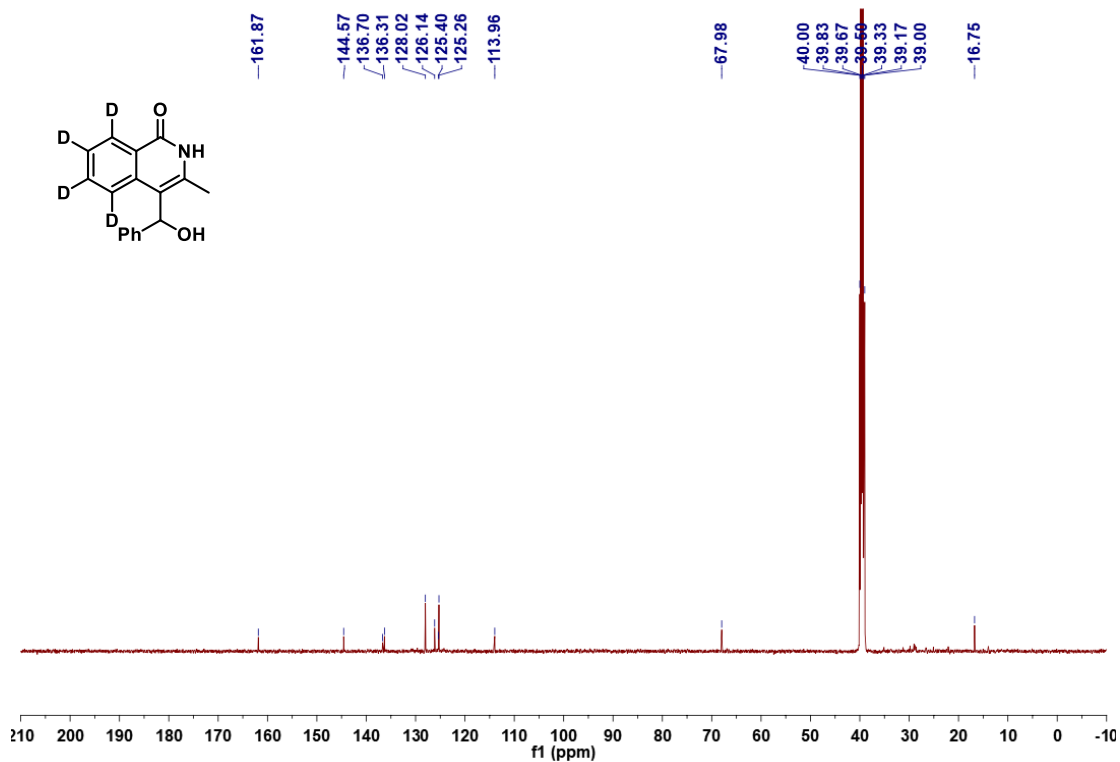

Supplement: d2gc02347d1.pdf [file d2gc02347d1.pdf]
